# Supplementary material for: The H3K27me3 epigenetic mark is crucial for callus cell identity and for the acquisition of new fate during root and shoot regeneration
Source: bioRxiv preprint, doi:10.1101/2022.05.12.491615, version 1 (2022-05-13)
Supplement: S1 [file 491615_file06.xlsx]

## Sheet: Callus expressed genes
Supplementary Data 1 Col-o Callus expressed genes.
Columns C,D,E show mRNA levels (in RPKM:Reads Per Kilobase of transcripts per Million mappesd reads) of callus derived from col-0 cotyledonas in three biological replicates. Column F is the mean.
A gene was considerd expressed if mean_RPKM > 1
Gene.ID	Gene name	Callus_RPKM_rep1	Callus_RPKM_rep2	Callus_RPKM_rep3	Callus_mean_RPKM
AT1G01010	NAC DOMAIN CONTAINING PROTEIN 1 (NAC001)	16.9209	24.9555	18.9069	20.2611
AT1G01020	(ARV1)	4.46601	5.59169	5.29163	5.11645
AT1G01040	DICER-LIKE 1 (DCL1)	10.9652	9.23949	10.7369	10.3139
AT1G01046	MICRORNA838A (MIR838A)	4.5875	6.68453	4.52029	5.26411
AT1G01050	PYROPHOSPHORYLASE 1 (PPa1)	34.6016	24.1543	26.903	28.553
AT1G01060	LATE ELONGATED HYPOCOTYL (LHY)	9.14464	7.22552	10.8883	9.08617
AT1G01070	nodulin MtN21 /EamA-like transporter family protein	2.35829	3.38616	5.64882	3.79776
AT1G01080	RNA-binding (RRM/RBD/RNP motifs) family protein	3.97437	4.30734	3.16211	3.8146
AT1G01090	PYRUVATE DEHYDROGENASE E1 ALPHA (PDH-E1 ALPHA)	41.1285	39.3148	44.6899	41.7111
AT1G01100	60S acidic ribosomal protein family	219.622	236.725	272.429	242.925
AT1G01110	IQ-DOMAIN 18 (IQD18)	1.69074	1.49108	0.86206	1.34796
AT1G01120	3-KETOACYL-COA SYNTHASE 1 (KCS1)	13.9401	17.5766	6.29841	12.605
AT1G01140	CBL-INTERACTING PROTEIN KINASE 9 (CIPK9)	0.73047	0.653191	2.73961	1.37442
AT1G01160	GRF1-INTERACTING FACTOR 2 (GIF2)	22.8698	25.9126	24.0439	24.2755
AT1G01170	ozone-responsive stress-like protein (DUF1138)	4.14567	2.49572	0.806594	2.48266
AT1G01180	S-adenosyl-L-methionine-dependent methyltransferases superfamily protein	1.50318	1.77799	1.24539	1.50885
AT1G01200	RAB GTPASE HOMOLOG A3 (RABA3)	2.31308	2.49755	1.95152	2.25405
AT1G01210	DNA-directed RNA polymerase%2C subunit M%2C archaeal	9.37207	11.3858	9.83483	10.1976
AT1G01220	L-FUCOKINASE/GDP-L-FUCOSE PYROPHOSPHORYLASE (FKGP)	7.48237	5.92541	10.7367	8.04817
AT1G01225	NC domain-containing protein-like protein	3.93765	6.42675	3.2924	4.55227
AT1G01230	ORMDL family protein	13.8646	13.6518	13.3216	13.6127
AT1G01240	transmembrane protein	15.2492	13.9407	11.3287	13.5062
AT1G01260	BHLH013; BHLH13; JAM2; JASMONATE ASSOCIATED MYC2 LIKE 2	10.2134	13.1773	11.2291	11.5399
AT1G01290	COFACTOR OF NITRATE REDUCTASE AND XANTHINE DEHYDROGENASE 3 (CNX3)	11.4439	11.36	13.334	12.046
AT1G01300	Eukaryotic aspartyl protease family protein	116.579	163.279	107.981	129.28
AT1G01320	REC1; REDUCED CHLOROPLAST COVERAGE	4.86161	4.01697	4.57257	4.48372
AT1G01340	CYCLIC NUCLEOTIDE GATED CHANNEL 10 (CNGC10)	1.81888	1.44876	2.29435	1.854
AT1G01350	Zinc finger (CCCH-type/C3HC4-type RING finger) family protein	14.5807	13.5949	16.72	14.9652
AT1G01360	REGULATORY COMPONENT OF ABA RECEPTOR 1 (RCAR1)	12.1043	14.6393	8.04932	11.5976
AT1G01370	(HTR12)	1.78505	2.65203	1.61795	2.01834
AT1G01430	TRICHOME BIREFRINGENCE-LIKE 25 (TBL25)	2.58323	2.75165	3.20197	2.84562
AT1G01440	hypothetical protein (DUF3133)	6.73205	7.16945	7.20967	7.03706
AT1G01448		3.40141	3.82582	2.94728	3.3915
AT1G01470	LATE EMBRYOGENESIS ABUNDANT 14 (LEA14)	69.5721	15.4127	122.225	69.07
AT1G01480	1-AMINO-CYCLOPROPANE-1-CARBOXYLATE SYNTHASE 2 (ACS2)	39.6613	7.95431	45.7854	31.1337
AT1G01490	Heavy metal transport/detoxification superfamily protein	25.2125	20.9501	22.4763	22.8796
AT1G01500	Erythronate-4-phosphate dehydrogenase family protein	4.55168	3.85434	4.88373	4.42991
AT1G01510	ANGUSTIFOLIA (AN)	19.4501	22.4728	18.4759	20.1329
AT1G01540	Protein kinase superfamily protein	20.4632	23.8793	21.6787	22.0071
AT1G01550	BYPASS 1 (BPS1)	108.364	88.635	117.184	104.728
AT1G01560	MAP KINASE 11 (MPK11)	2.50352	1.83794	3.70767	2.68304
AT1G01570	transferring glycosyl group transferase (DUF604)	1.91991	1.26533	0.981063	1.38877
AT1G01600	"CYTOCHROME P450, FAMILY 86, SUBFAMILY A, POLYPEPTIDE 4" (CYP86A4)	1.77759	3.48657	0.665328	1.9765
AT1G01610	GLYCEROL-3-PHOSPHATE ACYLTRANSFERASE 4 (GPAT4)	8.37422	10.8259	2.91687	7.37234
AT1G01620	PLASMA MEMBRANE INTRINSIC PROTEIN 1C (PIP1C)	33.1789	40.9609	19.621	31.2536
AT1G01630	Sec14p-like phosphatidylinositol transfer family protein	24.7325	29.7885	23.1603	25.8937
AT1G01640	BTB/POZ domain-containing protein	18.1292	16.714	15.9642	16.9358
AT1G01650	SIGNAL PEPTIDE PEPTIDASE-LIKE 4 (SPPL4)	14.2131	15.9397	16.5444	15.5658
AT1G01680	PLANT U-BOX 54 (PUB54)	11.0933	20.4023	9.86403	13.7866
AT1G01690	PUTATIVE RECOMBINATION INITIATION DEFECTS 3 (PRD3)	5.05744	5.3269	4.76998	5.05144
AT1G01700	RHO GUANYL-NUCLEOTIDE EXCHANGE FACTOR 2 (ROPGEF2)	0.811634	2.53911	0.277381	1.20937
AT1G01710	acyl-CoA thioesterase II	5.36919	5.52907	6.06865	5.65564
AT1G01720	(ATAF1)	44.4557	55.6059	73.884	57.9819
AT1G01725	adenylosuccinate synthetase	7.60164	7.28098	5.37473	6.75245
AT1G01730	hypothetical protein	46.9588	51.0025	40.9953	46.3189
AT1G01740	kinase with tetratricopeptide repeat domain-containing protein	2.09724	3.21994	1.85297	2.39005
AT1G01750	ACTIN DEPOLYMERIZING FACTOR 11 (ADF11)	1.39137	3.69312	1.24846	2.11098
AT1G01760	denosine deaminases acting on tRNA	2.16832	2.88755	1.72384	2.2599
AT1G01770	propionyl-CoA carboxylase	10.7154	6.39852	10.6391	9.25101
AT1G01780	PLIM2B (PLIM2b)	9.34609	6.19118	8.50636	8.01454
AT1G01800	NAD(P)-binding Rossmann-fold superfamily protein	34.8768	45.6889	42.3348	40.9669
AT1G01810	hypothetical protein	3.36085	1.87669	4.93412	3.39055
AT1G01820	PEROXIN 11C (PEX11C)	36.2134	36.7608	34.4459	35.8067
AT1G01830	ARM repeat superfamily protein	2.90565	4.973	2.65228	3.51031
AT1G01860	PALEFACE 1 (PFC1)	1.57958	2.04755	1.71792	1.78168
AT1G01880	5'-3' exonuclease family protein	1.20542	1.1867	0.881714	1.09127
AT1G01900	(SBTI1.1)	9.07185	2.51234	5.04378	5.54265
AT1G01910	ATGET3A; GET3A; GUIDED ENTRY OF TAIL-ANCHORED PROTEIN 3A	23.9371	21.6076	26.0981	23.881
AT1G01920	SET domain-containing protein	7.62194	10.5696	6.53023	8.24061
AT1G01930	zinc finger protein-like protein	5.30285	4.86899	4.72053	4.96412
AT1G01940	Cyclophilin-like peptidyl-prolyl cis-trans isomerase family protein	7.77211	9.08969	7.788	8.2166
AT1G01950	ARMADILLO REPEAT KINESIN 2 (ARK2)	5.20152	5.74084	5.21243	5.38493
AT1G01960	EMBRYO SAC DEVELOPMENT ARREST 10 (EDA10)	24.7034	26.419	24.0751	25.0658
AT1G01970	Tetratricopeptide repeat (TPR)-like superfamily protein	4.17762	4.25872	4.35966	4.26534
AT1G01990	hypothetical protein	30.1878	28.3041	25.0115	27.8345
AT1G02000	UDP-D-GLUCURONATE 4-EPIMERASE 2 (GAE2)	5.38112	4.53205	5.85912	5.25743
AT1G02010	SECRETORY 1A (SEC1A)	1.27633	1.21589	1.04587	1.17936
AT1G02020	nitroreductase family protein	2.75531	3.30817	1.85714	2.64021
AT1G02050	LESS ADHESIVE POLLEN 6 (LAP6)	7.21092	9.74883	5.36825	7.44267
AT1G02060	Tetratricopeptide repeat (TPR)-like superfamily protein	5.5901	8.47465	5.00824	6.35766
AT1G02080	transcription regulator	22.9428	21.4113	27.7474	24.0339
AT1G02090	FUSCA 5 (FUS5)	18.0415	14.3953	16.3691	16.2686
AT1G02100	SUPPRESSOR OF BRI1 (SBI1)	12.9953	16.6433	12.5906	14.0764
AT1G02110	bZIP domain class transcription factor (DUF630 and DUF632)	25.2605	28.8342	20.5524	24.8824
AT1G02120	VASCULAR ASSOCIATED DEATH1 (VAD1)	19.059	23.1861	19.7611	20.6687
AT1G02130	RAS 5 (RA-5)	16.8941	16.0483	14.7496	15.8974
AT1G02140	MAGO NASHI (MAGO)	82.2947	75.2097	84.4317	80.6453
AT1G02145	HOMOLOG OF ASPARAGINE-LINKED GLYCOSYLATION 12 (ALG12)	4.55	5.09421	3.99236	4.54552
AT1G02150	Tetratricopeptide repeat (TPR)-like superfamily protein	13.4495	17.2364	10.8657	13.8505
AT1G02160	Cox19 family protein (CHCH motif)	18.4079	20.6198	20.2216	19.7498
AT1G02170	METACASPASE 1 (MC1)	13.7868	11.0287	14.878	13.2312
AT1G02180	ferredoxin-like protein	3.19743	3.4059	2.11738	2.9069
AT1G02220	NAC DOMAIN CONTAINING PROTEIN 3 (NAC003)	47.6996	28.4016	96.6046	57.5686
AT1G02230	NAC DOMAIN CONTAINING PROTEIN 4 (NAC004)	4.11032	3.27054	3.73072	3.70386
AT1G02260	Divalent ion symporter	3.34512	2.50457	3.13007	2.99325
AT1G02270	Calcium-binding endonuclease/exonuclease/phosphatase family	3.45004	3.76517	3.41328	3.54283
AT1G02280	TRANSLOCON AT THE OUTER ENVELOPE MEMBRANE OF CHLOROPLASTS 33 (TOC33)	9.2881	9.05391	8.19662	8.84621
AT1G02290	hypothetical protein	6.01953	9.01187	4.21362	6.41501
AT1G02305	ATCATHB2	32.3566	23.5985	29.4567	28.4706
AT1G02310	ENDO-BETA-MANNANASE 1 (MAN1)	1.72077	0.443724	2.35623	1.50691
AT1G02330	integrator complex subunit-like protein	20.0143	19.243	24.2032	21.1535
AT1G02360	Chitinase family protein	21.1718	12.8536	63.4732	32.4995
AT1G02370	Tetratricopeptide repeat (TPR)-like superfamily protein	7.74037	10.3006	7.98689	8.67594
AT1G02380	transmembrane protein	6.21567	5.05204	6.4366	5.90144
AT1G02400	GIBBERELLIN 2-OXIDASE 6 (GA2OX6)	4.81369	3.17232	10.9361	6.30737
AT1G02410	cytochrome c oxidase assembly protein CtaG / Cox11 family	10.1361	9.54566	11.1969	10.2929
AT1G02420	Pentatricopeptide repeat (PPR) superfamily protein	3.35541	4.12485	2.96299	3.48108
AT1G02430	ADP-RIBOSYLATION FACTOR D1B (ARFD1B)	1.58641	1.95785	1.3253	1.62319
AT1G02450	NIM1-INTERACTING 1 (NIMIN1)	12.4491	11.8789	0.902387	8.41013
AT1G02475	Polyketide cyclase/dehydrase and lipid transport superfamily protein	3.76927	2.53944	4.12816	3.47896
AT1G02500	S-ADENOSYLMETHIONINE SYNTHETASE 1 (SAM1)	298.254	367.447	377.063	347.588
AT1G02520	ATP-BINDING CASSETTE B11 (ABCB11)	22.3428	21.9768	30.9491	25.0896
AT1G02530	ATP-BINDING CASSETTE B12 (ABCB12)	1.25659	1.57743	2.12453	1.65285
AT1G02560	NUCLEAR ENCODED CLP PROTEASE 5 (CLPP5)	19.0766	17.4107	17.7286	18.072
AT1G02660	alpha/beta-Hydrolases superfamily protein	3.62943	2.25004	3.74302	3.20749
AT1G02680	TBP-ASSOCIATED FACTOR 13 (TAF13)	7.11407	6.92123	6.96141	6.9989
AT1G02690	IMPORTIN ALPHA ISOFORM 6 (IMPA-6)	13.5976	18.0961	14.5275	15.4071
AT1G02720	GALACTURONOSYLTRANSFERASE 5 (GATL5)	3.06004	2.65274	2.07547	2.59608
AT1G02730	CELLULOSE SYNTHASE-LIKE D5 (CSLD5)	15.3068	21.193	11.2338	15.9112
AT1G02740	MORF RELATED GENE 2; MRG2	7.43002	7.32674	7.63865	7.46514
AT1G02750	Drought-responsive family protein	11.3475	9.23664	12.3792	10.9878
AT1G02770	hypothetical protein	2.51112	0.1182	0.793099	1.14081
AT1G02780	EMBRYO DEFECTIVE 2386 (emb2386)	418.025	501.904	556.392	492.107
AT1G02810	Plant invertase/pectin methylesterase inhibitor superfamily	18.9078	11.1215	15.8067	15.2787
AT1G02816	pectinesterase (Protein of unknown function%2C DUF538)	22.6308	16.3496	24.4338	21.1381
AT1G02840	SERINE/ARGININE-RICH PROTEIN SPLICING FACTOR 34 (SR34)	52.2931	64.0992	38.846	51.7461
AT1G02850	BETA GLUCOSIDASE 11 (BGLU11)	76.2606	86.8055	101.345	88.1369
AT1G02860	NITROGEN LIMITATION ADAPTATION (NLA)	18.9116	6.41387	17.6534	14.3263
AT1G02870	nucleolar-like protein	21.6646	23.8388	23.4258	22.9764
AT1G02880	THIAMIN PYROPHOSPHOKINASE1 (TPK1)	6.2796	5.66539	9.19707	7.04735
AT1G02890	AAA-type ATPase family protein	30.1769	29.4834	32.5383	30.7329
AT1G02900	RAPID ALKALINIZATION FACTOR 1 (RALF1)	4.74364	4.11578	2.77541	3.87828
AT1G02910	LOW PSII ACCUMULATION1 (LPA1)	5.58361	5.62494	4.91924	5.37593
AT1G02920	GLUTATHIONE S-TRANSFERASE 7 (GSTF7)	183.201	61.084	504.957	249.747
AT1G02930	GLUTATHIONE S-TRANSFERASE 6 (GSTF6)	209.051	43.1492	404.842	219.014
AT1G02960	kinetochore protein	7.98444	8.72392	6.60441	7.77092
AT1G02970	WEE1 KINASE HOMOLOG (WEE1)	2.39608	2.91679	2.71394	2.6756
AT1G02990	hypothetical protein	6.1399	6.98082	6.59031	6.57034
AT1G03000	PEROXIN 6 (PEX6)	5.4797	6.22416	4.66835	5.4574
AT1G03030	P-loop containing nucleoside triphosphate hydrolases superfamily protein	7.02011	6.27988	6.82588	6.70862
AT1G03040	basic helix-loop-helix (bHLH) DNA-binding superfamily protein	22.9002	24.0712	24.6469	23.8728
AT1G03060	SPIRRIG (SPI)	7.19275	7.34121	8.95672	7.83023
AT1G03080	NETWORKED 1D (NET1D)	34.0395	33.5156	37.6343	35.0631
AT1G03090	(MCCA)	10.628	7.67698	10.4912	9.5987
AT1G03100	Pentatricopeptide repeat (PPR) superfamily protein	2.06052	2.23951	2.28105	2.19369
AT1G03110	TRNA MODIFICATION 82 (TRM82)	6.19207	7.34216	6.96753	6.83392
AT1G03130	PHOTOSYSTEM I SUBUNIT D-2 (PSAD-2)	6.928	1.7753	3.2838	3.9957
AT1G03140	splicing factor Prp18 family protein	41.3644	37.8276	37.5467	38.9129
AT1G03150	Acyl-CoA N-acyltransferases (NAT) superfamily protein	5.28171	4.64239	6.31792	5.41401
AT1G03160	FZO-LIKE (FZL)	2.7769	2.49358	2.29398	2.52148
AT1G03180	non-structural protein	2.24353	2.6154	1.85112	2.23669
AT1G03190	ULTRAVIOLET HYPERSENSITIVE 6 (UVH6)	4.40782	4.62155	5.2017	4.74369
AT1G03200	hypothetical protein	9.95319	6.63078	12.5498	9.71124
AT1G03210	Phenazine biosynthesis PhzC/PhzF protein	27.4223	28.1567	32.974	29.5177
AT1G03220	Eukaryotic aspartyl protease family protein	665.454	405.332	914.641	661.809
AT1G03230	Eukaryotic aspartyl protease family protein	87.2479	98.3062	77.3565	87.6369
AT1G03250	R3H domain protein	8.94084	8.69287	9.7473	9.127
AT1G03260	SNARE associated Golgi protein family	3.17899	2.70049	2.67101	2.85016
AT1G03270	CBS domain protein with a domain protein (DUF21)	1.8183	2.06982	1.24705	1.71172
AT1G03280	Transcription factor TFIIE%2C alpha subunit	13.7543	14.8635	14.9129	14.5102
AT1G03290	ELKS/Rab6-interacting/CAST family protein	20.6731	18.2495	19.8194	19.5807
AT1G03300	DOMAIN OF UNKNOWN FUNCTION 724 1 (ATDUF1)	3.29316	2.73207	2.07969	2.70164
AT1G03310	DEBRANCHING ENZYME 1 (DBE1)	8.60792	6.9628	7.47523	7.68198
AT1G03330	LSM2; SM-LIKE 2	13.3157	12.6321	12.5058	12.8179
AT1G03350	BSD domain-containing protein	27.8627	24.2874	27.5812	26.5771
AT1G03360	RIBOSOMAL RNA PROCESSING 4 (RRP4)	9.78237	12.5983	12.4705	11.617
AT1G03365	RING/U-box superfamily protein	7.09983	8.72897	6.73422	7.52101
AT1G03370	C2 calcium/lipid-binding and GRAM domain containing protein	10.512	10.9033	12.368	11.2611
AT1G03380	HOMOLOG OF YEAST AUTOPHAGY 18 (ATG18) G (ATG18G)	13.561	11.5427	11.7684	12.2907
AT1G03400	2-oxoglutarate (2OG) and Fe(II)-dependent oxygenase superfamily protein	10.3905	14.9485	6.55035	10.6298
AT1G03410	(2A6)	5.88335	7.01979	6.26272	6.38862
AT1G03430	HISTIDINE-CONTAINING PHOSPHOTRANSFER FACTOR 5 (AHP5)	5.833	7.23391	4.58554	5.88415
AT1G03440	Leucine-rich repeat (LRR) family protein	1.77031	2.5086	1.25684	1.84525
AT1G03457	RNA-binding (RRM/RBD/RNP motifs) family protein	3.0418	5.12634	4.38758	4.18524
AT1G03470	NETWORKED 3A (NET3A)	5.17233	6.58421	3.43308	5.06321
AT1G03475	LESION INITIATION 2 (LIN2)	15.6911	17.6582	15.5219	16.2904
AT1G03495	HXXXD-type acyl-transferase family protein	3.88584	3.00995	3.94751	3.61443
AT1G03510	Tetratricopeptide repeat (TPR)-like superfamily protein	1.31371	1.85923	1.86068	1.67787
AT1G03520	Core-2/I-branching beta-1%2C6-N-acetylglucosaminyltransferase family protein	4.1405	4.02265	2.82494	3.66269
AT1G03530	NUCLEAR ASSEMBLY FACTOR 1 (NAF1)	13.6207	17.5086	13.212	14.7804
AT1G03540	Pentatricopeptide repeat (PPR-like) superfamily protein	2.4828	2.30196	1.87851	2.22109
AT1G03550	SECRETORY CARRIER MEMBRANE PROTEIN 4 (SCAMP4)	3.43014	3.00374	3.6081	3.34733
AT1G03560	Pentatricopeptide repeat (PPR-like) superfamily protein	4.35367	6.13613	4.22161	4.9038
AT1G03590	Protein phosphatase 2C family protein	19.952	21.9857	21.7805	21.2394
AT1G03600	(PSB27)	2.92188	1.04467	1.19962	1.72206
AT1G03610	plant/protein (DUF789)	28.439	22.6295	21.0908	24.0531
AT1G03620	ELMO/CED-12 family protein	9.15043	3.29217	3.43015	5.29092
AT1G03650	Acyl-CoA N-acyltransferases (NAT) superfamily protein	2.86948	3.62369	3.05728	3.18348
AT1G03680	THIOREDOXIN M-TYPE 1 (THM1)	11.2678	8.25481	8.19529	9.23929
AT1G03687	DTW domain-containing protein	5.70752	6.84158	6.05911	6.20274
AT1G03730	pyrroline-5-carboxylate reductase	6.45659	8.42138	6.78043	7.21947
AT1G03740	Protein kinase superfamily protein	11.9043	9.1759	13.7874	11.6225
AT1G03750	SWITCH 2 (SWI2)	4.65807	3.93013	4.69801	4.42874
AT1G03760	Prefoldin chaperone subunit family protein	11.1652	11.4047	12.2171	11.5957
AT1G03770	RING 1B (RING1B)	10.9621	8.97545	18.5181	12.8186
AT1G03780	TARGETING PROTEIN FOR XKLP2 (TPX2)	4.00165	6.52021	2.98415	4.502
AT1G03800	ERF DOMAIN PROTEIN 10 (ERF10)	2.77143	1.68744	2.8114	2.42342
AT1G03820	E6-like protein	38.4941	15.8929	8.86975	21.0856
AT1G03830	guanylate-binding family protein	7.14142	6.55245	6.81618	6.83668
AT1G03850	GLUTAREDOXIN 13 (GRXS13)	7.546	6.53759	14.1839	9.42251
AT1G03860	PROHIBITIN 2 (PHB2)	30.7206	31.0291	39.7358	33.8285
AT1G03870	FASCICLIN-LIKE ARABINOOGALACTAN 9 (FLA9)	5.50499	5.00597	4.38272	4.96456
AT1G03900	ATP-BINDING CASSETTE I18 (ABCI18)	77.1421	71.9958	77.6873	75.6084
AT1G03905	ATP-BINDING CASSETTE I19 (ABCI19)	3.54669	2.68811	4.73351	3.6561
AT1G03910	CACTIN; CTN	21.5745	21.9467	23.5127	22.3446
AT1G03930	DUAL SPECIFICITY KINASE 1 (ADK1)	5.54849	4.98538	6.35313	5.629
AT1G03940	HXXXD-type acyl-transferase family protein	2.86402	2.32392	3.16868	2.78554
AT1G03950	VACUOLAR PROTEIN SORTING-ASSOCIATED PROTEIN 2.3 (VPS2.3)	3.68232	1.81494	4.95089	3.48272
AT1G03960	Calcium-binding EF hand family protein	3.99636	3.76792	3.87522	3.87983
AT1G03970	G-BOX BINDING FACTOR 4 (GBF4)	18.2236	13.5932	18.3922	16.7364
AT1G03980	PHYTOCHELATIN SYNTHASE 2 (PCS2)	0.92057	1.36845	0.890902	1.05997
AT1G04000	hypothetical protein	9.37941	7.50527	6.15856	7.68108
AT1G04010	PHOSPHOLIPID STEROL ACYL TRANSFERASE 1 (PSAT1)	1.65291	2.19722	1.47775	1.77596
AT1G04020	BREAST CANCER ASSOCIATED RING 1 (BARD1)	2.6224	3.96033	1.6326	2.73845
AT1G04030	eisosome protein	4.11508	6.95831	3.38752	4.8203
AT1G04040	HAD superfamily%2C subfamily IIIB acid phosphatase	113.279	83.3165	165.058	120.551
AT1G04050	HOMOLOG OF SU(VAR)3-9 1 (SUVR1)	3.48257	3.74804	3.66143	3.63068
AT1G04070	TRANSLOCASE OF OUTER MEMBRANE 22-I (TOM22-I)	20.7159	20.0062	17.9671	19.563
AT1G04080	(PRP39)	37.0003	37.5386	39.6242	38.0544
AT1G04100	INDOLEACETIC ACID-INDUCED PROTEIN 10 (IAA10)	9.73094	3.07306	7.19064	6.66488
AT1G04120	ATP-BINDING CASSETTE C5 (ABCC5)	27.5139	33.1979	36.9769	32.5629
AT1G04130	TETRATRICOPEPTIDE REPEAT 2 (TPR2)	5.40862	4.89512	4.88115	5.06163
AT1G04140	Transducin family protein / WD-40 repeat family protein	25.911	26.7844	26.1702	26.2885
AT1G04170	EUKARYOTIC TRANSLATION INITIATION FACTOR 2 GAMMA SUBUNIT (EIF2 GAMMA)	37.8222	40.0578	44.6503	40.8434
AT1G04190	TETRATRICOPEPTIDE REPEAT 3 (TPR3)	20.3178	18.8283	22.635	20.5937
AT1G04200	dyggve-melchior-clausen syndrome protein	10.7818	9.77104	11.547	10.6999
AT1G04210	Leucine-rich repeat protein kinase family protein	16.4934	18.0948	18.6827	17.757
AT1G04220	3-KETOACYL-COA SYNTHASE 2 (KCS2)	15.7046	21.8493	2.95625	13.5034
AT1G04230	rRNA-processing EFG1-like protein (DUF2361)	8.27738	7.20876	9.16164	8.21593
AT1G04240	SHORT HYPOCOTYL 2 (SHY2)	4.92693	7.056	1.98343	4.65545
AT1G04250	AUXIN RESISTANT 3 (AXR3)	39.5434	47.9896	29.1133	38.8821
AT1G04260	CAMV MOVEMENT PROTEIN INTERACTING PROTEIN 7 (MPI7)	19.2468	19.6675	16.6517	18.522
AT1G04270	CYTOSOLIC RIBOSOMAL PROTEIN S15 (RPS15)	323.896	348.915	355.145	342.652
AT1G04280	P-loop containing nucleoside triphosphate hydrolases superfamily protein	12.44	14.5147	20.2971	15.7506
AT1G04290	Thioesterase superfamily protein	1.50285	1.23178	1.64984	1.46149
AT1G04300	MUSE13; TRAF1B; TUMOR NECROSIS FACTOR RECEPTOR-ASSOCIATED FACTOR 1B	24.2906	22.5261	25.7996	24.2054
AT1G04310	ETHYLENE RESPONSE SENSOR 2 (ERS2)	7.20559	7.39516	3.96062	6.18712
AT1G04340	HR-like lesion-inducing protein-like protein	12.2619	11.7038	11.8687	11.9448
AT1G04350	2-oxoglutarate (2OG) and Fe(II)-dependent oxygenase superfamily protein	1.58481	0.89141	0.798942	1.09172
AT1G04390	BTB/POZ domain-containing protein	3.16952	3.61876	3.05448	3.28092
AT1G04400	CRYPTOCHROME 2 (CRY2)	51.7236	46.3408	55.4177	51.1607
AT1G04410	CYTOSOLIC-NAD-DEPENDENT MALATE DEHYDROGENASE 1 (c-NAD-MDH1)	263.908	191.42	296.121	250.483
AT1G04420	NAD(P)-linked oxidoreductase superfamily protein	1.93766	1.97835	1.90281	1.93961
AT1G04425		3.45913	3.66301	0.970784	2.69764
AT1G04430	S-adenosyl-L-methionine-dependent methyltransferases superfamily protein	30.9882	29.022	39.3882	33.1328
AT1G04440	CASEIN KINASE LIKE 13 (CKL13)	34.1957	24.5627	35.3293	31.3626
AT1G04480	Ribosomal protein L14p/L23e family protein	91.9446	103.321	120.063	105.109
AT1G04510	MOS4-ASSOCIATED COMPLEX 3A (MAC3A)	20.1365	19.4196	21.6087	20.3883
AT1G04520	PLASMODESMATA-LOCATED PROTEIN 2 (PDLP2)	2.10066	3.08741	2.06313	2.41707
AT1G04530	TETRATRICOPEPTIDE REPEAT 4 (TPR4)	14.7587	16.0609	10.2089	13.6762
AT1G04550	INDOLE-3-ACETIC ACID INDUCIBLE 12 (IAA12)	12.9118	15.6912	12.0394	13.5475
AT1G04555	transmembrane protein	5.75024	5.08532	6.89699	5.91085
AT1G04580	ALDEHYDE OXIDASE 4 (AO4)	13.0398	1.82873	42.7171	19.1952
AT1G04590	PPR containing-like protein	8.26841	9.06821	8.96445	8.76703
AT1G04630	MATERNAL EFFECT EMBRYO ARREST 4 (MEE4)	12.7342	12.7321	11.6531	12.3732
AT1G04635	EMBRYO DEFECTIVE 1687 (EMB1687)	5.63383	4.10285	8.38109	6.03926
AT1G04640	LIPOYLTRANSFERASE 2 (LIP2)	2.60637	2.64661	2.70581	2.65293
AT1G04650	holliday junction resolvase	2.48822	2.45018	2.33108	2.42316
AT1G04680	Pectin lyase-like superfamily protein	3.06878	1.80004	4.39421	3.08767
AT1G04690	POTASSIUM CHANNEL BETA SUBUNIT 1 (KAB1)	39.3459	37.125	45.082	40.5176
AT1G04700	PB1 domain-containing protein tyrosine kinase	1.26181	1.27846	1.4517	1.33066
AT1G04710	PEROXISOMAL 3-KETOACYL-COA THIOLASE 4 (PKT4)	1.42593	1.98121	1.76635	1.7245
AT1G04730	CHROMOSOME TRANSMISSION FIDELITY 18 (CTF18)	2.59846	3.0425	2.22346	2.62147
AT1G04750	VESICLE-ASSOCIATED MEMBRANE PROTEIN 721 (VAMP721)	42.0281	43.0294	45.3179	43.4585
AT1G04770	SD!2; SULFUR DEFICIENCY INDUCED 2	30.582	47.1628	37.6706	38.4718
AT1G04780	Ankyrin repeat family protein	30.9623	31.1706	37.7109	33.2813
AT1G04790	RING/U-box superfamily protein	8.67327	9.66302	9.82528	9.38719
AT1G04810	26S proteasome regulatory complex%2C non-ATPase subcomplex%2C Rpn2/Psmd1 subunit	23.8836	24.1965	28.0364	25.3722
AT1G04820	TUBULIN ALPHA-4 CHAIN (TUA4)	189.397	236.539	199.282	208.406
AT1G04830	Ypt/Rab-GAP domain of gyp1p superfamily protein	6.43984	6.13906	7.22512	6.60134
AT1G04840	Tetratricopeptide repeat (TPR)-like superfamily protein	1.03855	1.22497	0.931663	1.06506
AT1G04850	ubiquitin-associated (UBA)/TS-N domain-containing protein	30.5633	28.7729	41.9761	33.7708
AT1G04860	UBIQUITIN-SPECIFIC PROTEASE 2 (UBP2)	13.9562	13.2095	14.5173	13.8943
AT1G04870	PROTEIN ARGININE METHYLTRANSFERASE 10 (PRMT10)	27.1276	32.4328	32.3337	30.6314
AT1G04900	NADH dehydrogenase ubiquinone complex I%2C assembly factor-like protein (DUF185)	3.7181	4.56114	3.45125	3.91017
AT1G04910	O-fucosyltransferase family protein	9.94515	9.30716	10.7318	9.99469
AT1G04930	hydroxyproline-rich glycoprotein family protein	2.32122	2.30922	2.70923	2.44656
AT1G04945	HIT-type Zinc finger family protein	4.09366	4.29211	5.22611	4.53729
AT1G04950	TATA BOX ASSOCIATED FACTOR II 59 (TAFII59)	7.42543	7.32348	6.41048	7.05313
AT1G04960	golgin family A protein (DUF1664)	7.51899	6.08863	8.77169	7.45977
AT1G04970	LBR-1	14.4489	11.6215	15.4008	13.8237
AT1G04980	PDI-LIKE 2-2 (PDIL2-2)	4.94185	4.78261	8.01127	5.91191
AT1G04985	triacylglycerol lipase-like protein	13.1143	11.1141	12.68	12.3028
AT1G04990	Zinc finger C-x8-C-x5-C-x3-H type family protein	19.2887	10.4557	24.995	18.2465
AT1G05000	PLANT AND FUNGI ATYPICAL DUAL-SPECI&#64257;CITY PHOSPHATASE 1 (PFA-DSP1)	2.16164	0.804868	2.40397	1.79016
AT1G05010	ETHYLENE-FORMING ENZYME (EFE)	35.53	29.3026	80.9386	48.5904
AT1G05030	Major facilitator superfamily protein	1.74007	2.10892	1.58196	1.81032
AT1G05055	GENERAL TRANSCRIPTION FACTOR II H2 (GTF2H2)	6.58433	6.75199	5.86804	6.40146
AT1G05060	coiled-coil protein	28.6402	23.291	29.491	27.1407
AT1G05065	CLAVATA3/ESR-RELATED 20 (CLE20)	12.0006	8.72438	11.6236	10.7829
AT1G05070	transmembrane protein%2C putative (DUF1068)	13.1676	12.0838	11.9968	12.4161
AT1G05090	dentin sialophosphoprotein-like protein	6.38445	7.45542	5.60415	6.48134
AT1G05100	MITOGEN-ACTIVATED PROTEIN KINASE KINASE KINASE 18 (MAPKKK18)	4.16919	6.69609	5.08533	5.31687
AT1G05120	Helicase protein with RING/U-box domain-containing protein	8.97261	10.719	9.92906	9.87356
AT1G05135		3.63578	5.81484	3.56973	4.34011
AT1G05140	Peptidase M50 family protein	5.80891	4.36067	2.9656	4.37839
AT1G05150	Calcium-binding tetratricopeptide family protein	14.3267	15.5338	10.5572	13.4726
AT1G05160	"CYTOCHROME P450, FAMILY 88, SUBFAMILY A, POLYPEPTIDE 3" (CYP88A3)	3.56846	4.63817	3.32754	3.84472
AT1G05170	Galactosyltransferase family protein	1.07545	0.872099	1.3872	1.11158
AT1G05180	AUXIN RESISTANT 1 (AXR1)	13.9047	11.4096	14.9531	13.4225
AT1G05190	EMBRYO DEFECTIVE 2394 (emb2394)	7.13277	7.53729	6.90811	7.19272
AT1G05200	GLUTAMATE RECEPTOR 3.4 (GLR3.4)	1.03133	1.40801	1.17885	1.20607
AT1G05205	hexokinase-1 protein	13.3827	14.0052	15.3897	14.2592
AT1G05220	Transmembrane protein 97%2C Putative	0.707629	1.65904	0.748301	1.03832
AT1G05270	TraB family protein	12.4681	11.2228	14.1949	12.6286
AT1G05300	ZINC TRANSPORTER 5 PRECURSOR (ZIP5)	1.81553	1.50158	2.03858	1.78523
AT1G05320	myosin heavy chain%2C embryonic smooth protein	9.04998	10.0189	13.6249	10.8979
AT1G05340	cysteine-rich TM module stress tolerance protein	7.12553	1.0298	11.4564	6.53724
AT1G05350	NAD(P)-binding Rossmann-fold superfamily protein	9.05563	9.59228	10.271	9.63964
AT1G05360	KILLING ME SLOWLY 2 (KMS2)	3.9478	3.74711	2.98594	3.56029
AT1G05380	Acyl-CoA N-acyltransferase with RING/FYVE/PHD-type zinc finger protein	16.1156	17.4673	17.6466	17.0765
AT1G05385	LOW PSII ACCUMULATION 19 (LPA19)	2.42561	2.6113	1.10635	2.04775
AT1G05400	hypothetical protein	3.25977	2.45033	3.01576	2.90862
AT1G05410	CDPK adapter%2C putative (DUF1423)	10.3443	11.2818	10.6099	10.7453
AT1G05430	hypothetical protein	9.98282	9.96458	10.8864	10.2779
AT1G05460	SILENCING DEFECTIVE (SDE3)	7.97117	7.52871	6.28064	7.26017
AT1G05470	COTYLEDON VASCULAR PATTERN 2 (CVP2)	2.46683	3.15482	1.78285	2.46816
AT1G05490	CHROMATIN REMODELING 31 (chr31)	4.4813	2.06957	3.19523	3.2487
AT1G05500	(NTMC2T2.1)	9.13858	8.32451	8.89873	8.78727
AT1G05520	Sec23/Sec24 protein transport family protein	14.157	12.7385	16.2325	14.376
AT1G05570	CALLOSE SYNTHASE 1 (CALS1)	6.25246	6.27977	4.96916	5.8338
AT1G05575	transmembrane protein	3.26287	2.16541	4.62488	3.35105
AT1G05577	UPSTREAM OF FLC protein (DUF966)	2.4337	5.20563	1.7043	3.11454
AT1G05590	BETA-HEXOSAMINIDASE 2 (HEXO2)	3.13926	5.0011	1.54552	3.22863
AT1G05600	EMBRYO DEFECTIVE 3101 (EMB3101)	3.15612	3.28137	1.93777	2.79175
AT1G05620	URIDINE-RIBOHYDROLASE 2 (URH2)	13.0186	14.2061	23.1937	16.8061
AT1G05630	INOSITOL-POLYPHOSPHATE 5-PHOSPHATASE 13 (5PTASE13)	1.41867	2.41616	1.45929	1.7647
AT1G05640	Ankyrin repeat family protein	2.25576	3.74314	0.99442	2.33111
AT1G05670	Pentatricopeptide repeat (PPR-like) superfamily protein	2.74006	3.65696	2.43693	2.94465
AT1G05675	UDP-Glycosyltransferase superfamily protein	2.02958	0.451635	1.23243	1.23788
AT1G05680	URIDINE DIPHOSPHATE GLYCOSYLTRANSFERASE 74E2 (UGT74E2)	3.37843	1.22995	5.46673	3.35837
AT1G05710	basic helix-loop-helix (bHLH) DNA-binding superfamily protein	19.2302	7.22803	7.4477	11.302
AT1G05720	selenoprotein family protein	10.0558	11.6648	11.3316	11.0174
AT1G05730	FAM136A-like protein (DUF842)	3.36626	3.23487	3.84961	3.48358
AT1G05750	PIGMENT DEFECTIVE 247 (PDE247)	2.23262	2.59259	2.46542	2.43021
AT1G05780	Vacuolar ATPase assembly integral membrane protein VMA21-like domain-containing protein	4.21128	4.56869	3.9845	4.25482
AT1G05785	Got1/Sft2-like vescicle transport protein family	2.68474	2.9417	2.57474	2.73373
AT1G05790	lipase class 3 family protein	3.91883	3.78785	3.46582	3.72417
AT1G05805	basic helix-loop-helix (bHLH) DNA-binding superfamily protein	9.30781	5.36342	8.81619	7.82914
AT1G05810	RAB GTPASE HOMOLOG A5E (RABA5E)	7.06907	17.0097	6.22476	10.1012
AT1G05830	TRITHORAX-LIKE PROTEIN 2 (ATX2)	6.26118	7.85772	7.00693	7.04194
AT1G05840	Eukaryotic aspartyl protease family protein	11.0724	11.1322	9.63747	10.614
AT1G05850	POM-POM1 (POM1)	100.827	68.3471	93.9893	87.7211
AT1G05860	INO80 complex subunit D-like protein	5.87295	6.19512	5.81595	5.96134
AT1G05870	hypothetical protein (DUF1685)	27.1144	26.4474	24.0602	25.874
AT1G05890	ARIADNE 5 (ARI5)	21.2518	22.7243	22.2799	22.0853
AT1G05900	ENDONUCLEASE III 2 (NTH2)	1.75561	1.41155	1.4854	1.55085
AT1G05910	cell division cycle protein 48-related / CDC48-like protein	11.0458	11.2556	16.4212	12.9075
AT1G05940	CATIONIC AMINO ACID TRANSPORTER 9 (CAT9)	11.1058	10.6145	12.0837	11.268
AT1G05950	hypothetical protein	4.62877	4.93624	2.82831	4.13111
AT1G05960	ARM repeat superfamily protein	5.04377	7.33062	5.73743	6.03727
AT1G05970	RNA-binding (RRM/RBD/RNP motifs) family protein	4.60786	6.23999	4.34346	5.06377
AT1G06000	UGT89C1	5.12756	11.8965	5.67813	7.56741
AT1G06010	basic leucine zipper/W2 domain protein	6.64834	8.64533	4.39254	6.56207
AT1G06040	SALT TOLERANCE (STO)	55.3141	44.1365	26.7272	42.0593
AT1G06050	ENHANCED DISEASE RESISTANCE-like protein (DUF1336)	3.3547	2.3168	2.75249	2.808
AT1G06060	LisH and RanBPM domains containing protein	8.59511	8.66864	7.61076	8.29151
AT1G06070	Basic-leucine zipper (bZIP) transcription factor family protein	14.7441	14.3495	14.614	14.5692
AT1G06080	DELTA 9 DESATURASE 1 (ADS1)	66.1617	115.109	12.4205	64.5636
AT1G06110	SKP1/ASK-INTERACTING PROTEIN 16 (SKIP16)	19.2052	22.0668	16.7725	19.3482
AT1G06130	GLYOXALASE 2-4 (GLX2-4)	8.75382	9.93839	8.46182	9.05134
AT1G06140	MITOCHONDRIAL EDITING FACTOR 3 (MEF3)	1.10638	1.23765	1.15231	1.16545
AT1G06180	MYB DOMAIN PROTEIN 13 (MYB13)	3.83799	4.13555	5.01853	4.33069
AT1G06190	RHO-N 1 (RHON1)	11.471	10.7687	12.491	11.5769
AT1G06200	Peptidase S24/S26A/S26B/S26C family protein	16.3232	17.7102	15.2873	16.4402
AT1G06210	ENTH/VHS/GAT family protein	16.9691	17.6354	19.8647	18.1564
AT1G06220	MATERNAL EFFECT EMBRYO ARREST 5 (MEE5)	24.7081	27.461	27.8978	26.689
AT1G06230	GLOBAL TRANSCRIPTION FACTOR GROUP E4 (GTE4)	30.5342	31.2879	27.4459	29.756
AT1G06240	diiron containing four-helix bundle family ferritin protein%2C putative (Protein of unknown function DUF455)	4.62678	4.12395	4.60705	4.45259
AT1G06250	alpha/beta-Hydrolases superfamily protein	2.33394	1.94993	2.03413	2.106
AT1G06265		1.53133	1.79811	1.10721	1.47888
AT1G06270	Pentatricopeptide repeat (PPR) superfamily protein	4.55835	6.07441	4.36493	4.99923
AT1G06290	ACYL-COA OXIDASE 3 (ACX3)	17.4182	14.0433	24.2417	18.5677
AT1G06350	ADS4; ATADS4; DELTA 9 DESATURASE 4	1.60732	2.50703	0.199816	1.43806
AT1G06370		1.34781	2.1827	0.865381	1.4653
AT1G06380	Ribosomal protein L1p/L10e family	9.33592	12.4544	10.0959	10.6288
AT1G06390	GSK3/SHAGGY-LIKE PROTEIN KINASE 1 (GSK1)	20.0767	20.878	19.0033	19.986
AT1G06400	(ARA-2)	33.5896	29.3713	26.2174	29.7261
AT1G06410	TREHALOSE-PHOSPHATASE/SYNTHASE 7 (TPS7)	39.4121	38.0524	41.7655	39.7434
AT1G06420	DNA ligase-like protein	2.05244	1.84493	0.416749	1.43804
AT1G06430	FTSH PROTEASE 8 (ftsh8)	7.29481	7.13032	9.28236	7.9025
AT1G06440	Ubiquitin carboxyl-terminal hydrolase family protein	2.46403	1.9218	2.90764	2.43116
AT1G06450	Polynucleotidyl transferase%2C ribonuclease H-like superfamily protein	7.50585	3.95502	5.66019	5.70702
AT1G06460	ALPHA-CRYSTALLIN DOMAIN 32.1 (ACD32.1)	2.30209	1.47843	1.60265	1.79439
AT1G06470	Nucleotide/sugar transporter family protein	5.89223	5.25677	5.38372	5.51091
AT1G06475	transmembrane protein	3.27589	5.42136	3.1266	3.94128
AT1G06500	hypothetical protein	7.12967	6.91358	6.3526	6.79862
AT1G06510	forkhead-associated domain protein	3.25515	4.54708	3.38572	3.72932
AT1G06515	SMALL SUBUNIT OF SPT A; SSSPTA	7.63903	9.21502	6.50412	7.78605
AT1G06520	GLYCEROL-3-PHOSPHATE ACYLTRANSFERASE 1 (GPAT1)	3.60616	0.907343	3.88724	2.80025
AT1G06530	PEROXISOMAL AND MITOCHONDRIAL DIVISION FACTOR 2 (PMD2)	50.5139	53.3583	44.617	49.4964
AT1G06540	hypothetical protein	1.27161	2.11138	4.91811	2.76703
AT1G06550	ATP-dependent caseinolytic (Clp) protease/crotonase family protein	51.2477	47.6978	92.7516	63.899
AT1G06560	NOP2C	5.64817	5.64289	5.78931	5.69346
AT1G06570	PHYTOENE DESATURATION 1 (PDS1)	53.5825	39.8846	52.2677	48.5783
AT1G06580	PENTATRICOPEPTIDE REPEAT 1; PPR1	1.73006	2.25522	1.43737	1.80755
AT1G06590	anaphase-promoting complex subunit	3.47094	3.9692	3.20153	3.54722
AT1G06620	2-oxoglutarate (2OG) and Fe(II)-dependent oxygenase superfamily protein	15.9908	31.9725	22.1064	23.3566
AT1G06630	F-box/RNI-like superfamily protein	10.1145	11.1075	9.65794	10.2933
AT1G06640	2-oxoglutarate (2OG) and Fe(II)-dependent oxygenase superfamily protein	26.2465	23.2674	21.2973	23.6037
AT1G06650	2-oxoglutarate (2OG) and Fe(II)-dependent oxygenase superfamily protein	23.4343	9.67945	13.8582	15.6573
AT1G06660	JASON (JASON)	2.483	3.72317	2.32096	2.84238
AT1G06670	NUCLEAR DEIH-BOXHELICASE (NIH)	18.6565	21.5328	22.0468	20.7454
AT1G06680	PHOTOSYSTEM II SUBUNIT P-1 (PSBP-1)	36.9085	2.84533	8.40961	16.0545
AT1G06700	Protein kinase superfamily protein	27.2141	27.3412	27.966	27.5071
AT1G06710	Tetratricopeptide repeat (TPR)-like superfamily protein	2.75619	3.29033	2.98908	3.01187
AT1G06720	P-loop containing nucleoside triphosphate hydrolases superfamily protein	15.0256	17.2091	17.3906	16.5418
AT1G06730	pfkB-like carbohydrate kinase family protein	5.69757	5.64818	5.17246	5.50607
AT1G06760	H1.1; HISTONE 1.1	178.357	146.565	158.969	161.297
AT1G06770	DREB2A-INTERACTING PROTEIN 1 (DRIP1)	3.19777	3.83726	3.85471	3.62991
AT1G06780	GALACTURONOSYLTRANSFERASE 6 (GAUT6)	4.79461	4.37775	6.78753	5.31996
AT1G06790	RNA polymerase Rpb7 N-terminal domain-containing protein	3.77386	4.09784	4.06826	3.97999
AT1G06800	PHOSPHOLIPASE A I GAMMA 1 (PLA-I\{gamma\}1)	14.5708	20.0342	17.7874	17.4641
AT1G06820	CAROTENOID ISOMERASE (CRTISO)	5.10685	5.1825	5.21064	5.16666
AT1G06840	Leucine-rich repeat protein kinase family protein	18.8243	19.1745	14.9872	17.662
AT1G06850	BASIC LEUCINE-ZIPPER 52 (bZIP52)	6.6781	6.16061	6.77645	6.53839
AT1G06870	PLASTIDIC TYPE I SIGNAL PEPTIDASE 2A (PLSP2A)	7.84173	7.53308	9.90725	8.42735
AT1G06890	UDP-XYLOSE TRANSPORTER3; UXT3	25.3579	24.9817	31.4508	27.2635
AT1G06900	Insulinase (Peptidase family M16) family protein	18.6691	20.0325	18.6564	19.1193
AT1G06910	TRF-LIKE 7 (TRFL7)	2.80746	3.56209	2.65514	3.00823
AT1G06950	TRANSLOCON AT THE INNER ENVELOPE MEMBRANE OF CHLOROPLASTS 110 (TIC110)	17.7698	18.1548	20.0062	18.6436
AT1G06960	RNA-binding (RRM/RBD/RNP motifs) family protein	6.76132	7.67904	4.92861	6.45632
AT1G06980	6%2C7-dimethyl-8-ribityllumazine synthase	36.3111	44.3157	19.9041	33.5103
AT1G06990	GDSL-like Lipase/Acylhydrolase superfamily protein	2.79614	8.02674	1.17487	3.99925
AT1G07000	EXOCYST SUBUNIT EXO70 FAMILY PROTEIN B2 (EXO70B2)	12.0946	11.4082	17.3932	13.632
AT1G07010	SHEWENELLA-LIKE PROTEIN PHOSPHATASE 1 (SLP1)	1.89113	0.629474	1.88439	1.46833
AT1G07020	hypothetical protein	21.235	22.7333	21.9512	21.9732
AT1G07030	Mitochondrial substrate carrier family protein	11.3208	13.4574	12.4516	12.4099
AT1G07040	plant/protein	20.4815	11.205	25.6947	19.1271
AT1G07070	Ribosomal protein L35Ae family protein	10.492	10.8624	11.3077	10.8874
AT1G07080	Thioredoxin superfamily protein	20.399	18.3062	20.6906	19.7986
AT1G07090	LIGHT SENSITIVE HYPOCOTYLS 6 (LSH6)	18.591	19.7927	18.0548	18.8128
AT1G07110	"FRUCTOSE-2,6-BISPHOSPHATASE" (F2KP)	5.35316	4.15326	5.50847	5.00496
AT1G07130	(STN1)	1.37249	0.866617	1.50755	1.24889
AT1G07135	glycine-rich protein	28.5003	6.88909	19.0074	18.1323
AT1G07140	(SIRANBP)	80.6516	73.2791	111.028	88.3194
AT1G07150	MITOGEN-ACTIVATED PROTEIN KINASE KINASE KINASE 13 (MAPKKK13)	2.6341	2.40794	1.58745	2.20983
AT1G07170	PHF5-like protein	15.8364	20.284	16.4795	17.5333
AT1G07200	Double Clp-N motif-containing P-loop nucleoside triphosphate hydrolases superfamily protein	7.90771	9.01661	9.36827	8.76419
AT1G07210	Ribosomal protein S18	30.3394	32.6969	33.1124	32.0496
AT1G07220	O-glucosyltransferase rumi-like protein (DUF821)	9.88857	10.949	11.9575	10.9317
AT1G07230	NON-SPECIFIC PHOSPHOLIPASE C1 (NPC1)	24.4346	20.7696	18.8511	21.3518
AT1G07240	UDP-GLUCOSYL TRANSFERASE 71C5 (UGT71C5)	16.4916	18.1317	19.9603	18.1945
AT1G07250	UDP-GLUCOSYL TRANSFERASE 71C4 (UGT71C4)	7.85245	10.265	6.86992	8.32912
AT1G07260	UDP-GLUCOSYL TRANSFERASE 71C3 (UGT71C3)	7.39781	18.7058	3.73592	9.94653
AT1G07280	Tetratricopeptide repeat (TPR)-like superfamily protein	5.72525	3.80555	2.54672	4.02584
AT1G07290	GOLGI NUCLEOTIDE SUGAR TRANSPORTER 2 (GONST2)	2.05056	1.28061	0.748875	1.36002
AT1G07300	josephin protein-like protein	5.96302	4.8738	4.98154	5.27279
AT1G07310	Calcium-dependent lipid-binding (CaLB domain) family protein	41.7469	35.3199	36.4128	37.8265
AT1G07320	RIBOSOMAL PROTEIN L4 (RPL4)	6.19096	8.94732	4.38277	6.50702
AT1G07350	SERINE/ARGININE RICH-LIKE PROTEIN 45A (SR45a)	29.0769	25.2641	35.0977	29.8129
AT1G07360	MOS4-ASSOCIATED COMPLEX SUBUNIT 5A (MAC5A)	23.4152	23.6854	25.6956	24.2654
AT1G07370	PROLIFERATING CELLULAR NUCLEAR ANTIGEN 1 (PCNA1)	19.6068	18.8587	16.8839	18.4498
AT1G07380	Neutral/alkaline non-lysosomal ceramidase	16.9071	11.3341	15.0834	14.4415
AT1G07390	RECEPTOR LIKE PROTEIN 1 (RLP1)	2.89046	0.876667	4.06166	2.60959
AT1G07400	HSP20-like chaperones superfamily protein	13.2666	6.6321	25.9252	15.2746
AT1G07410	RAB GTPASE HOMOLOG A2B (RABA2b)	3.52641	2.39964	2.58419	2.83675
AT1G07420	STEROL 4-ALPHA-METHYL-OXIDASE 2-1 (SMO2-1)	13.8822	16.0904	12.1999	14.0575
AT1G07430	HIGHLY ABA-INDUCED PP2C GENE 2 (HAI2)	6.15442	3.78578	5.48828	5.14282
AT1G07470	Transcription factor IIA%2C alpha/beta subunit	6.85224	6.86253	7.313	7.00926
AT1G07480	Transcription factor IIA%2C alpha/beta subunit	6.18612	5.74757	6.58379	6.17249
AT1G07500	hypothetical protein	13.456	5.31747	17.5883	12.1206
AT1G07510	FTSH PROTEASE 10 (ftsh10)	15.4088	14.9796	18.0421	16.1435
AT1G07520	GRAS family transcription factor	8.08665	7.65293	6.35099	7.36352
AT1G07530	SCARECROW-LIKE 14 (SCL14)	25.8447	27.1767	23.37	25.4638
AT1G07570	(APK1A)	3.73729	6.4805	2.2639	4.16056
AT1G07590	Tetratricopeptide repeat (TPR)-like superfamily protein	55.7744	36.5364	153.272	81.861
AT1G07610	METALLOTHIONEIN 1C (MT1C)	60.5211	39.889	87.9709	62.7937
AT1G07615	OBG A-1	7.42445	10.1705	7.8266	8.47387
AT1G07630	POL-LIKE 5 (PLL5)	22.6964	19.3839	25.1837	22.4213
AT1G07650	Leucine-rich repeat transmembrane protein kinase	2.02069	2.26681	2.29721	2.1949
AT1G07660	Histone superfamily protein	38.6873	44.8563	31.8937	38.4791
AT1G07670	ENDOMEMBRANE-TYPE CA-ATPASE 4 (ECA4)	42.3491	30.2459	47.1869	39.9273
AT1G07700	Thioredoxin superfamily protein	2.63923	1.79189	1.95589	2.129
AT1G07705	NEGATIVE ON TATA LESS2A; NOT2A	7.44173	6.80828	8.46267	7.57089
AT1G07720	3-KETOACYL-COA SYNTHASE 3 (KCS3)	5.14862	2.87149	3.67478	3.89829
AT1G07740	Tetratricopeptide repeat (TPR)-like superfamily protein	1.20515	1.43368	1.40605	1.34829
AT1G07745	HOMOLOG OF RAD51 D (RAD51D)	1.6048	2.65772	1.7092	1.99057
AT1G07750	RmlC-like cupins superfamily protein	31.8159	13.2944	31.8933	25.6679
AT1G07770	RIBOSOMAL PROTEIN S15A (RPS15A)	93.7525	101.473	130.536	108.587
AT1G07780	PHOSPHORIBOSYLANTHRANILATE ISOMERASE 1 (PAI1)	4.54664	6.90149	5.54692	5.66502
AT1G07790	(HTB1)	45.8523	58.271	39.0363	47.7199
AT1G07810	ER-TYPE CA2+-ATPASE 1 (ECA1)	35.9464	25.5579	39.2248	33.5764
AT1G07820	Histone superfamily protein	96.3183	110.288	68.6658	91.7575
AT1G07830	ribosomal protein L29 family protein	20.2467	27.8804	19.91	22.679
AT1G07840	Sas10/Utp3/C1D family	8.38802	8.83311	8.77088	8.664
AT1G07870	Protein kinase superfamily protein	15.1609	14.9111	17.0842	15.7187
AT1G07880	(ATMPK13)	11.2899	6.66757	0.950199	6.30254
AT1G07890	ASCORBATE PEROXIDASE 1 (APX1)	116.5	124.707	153.57	131.592
AT1G07901	hypothetical protein	4.96529	7.93843	6.24864	6.38412
AT1G07910	RNALIGASE (RNL)	2.43119	2.74448	3.20327	2.79298
AT1G07920	GTP binding Elongation factor Tu family protein	312.875	334.524	371.352	339.584
AT1G07930	GTP binding Elongation factor Tu family protein	295.314	306.637	357.734	319.895
AT1G07940	GTP binding Elongation factor Tu family protein	298.216	314.887	361.648	324.917
AT1G07950	(MED22B)	11.1582	11.1044	10.7632	11.0086
AT1G07960	PDI-LIKE 5-1 (PDIL5-1)	14.5434	15.4516	14.9905	14.9952
AT1G07970	cytochrome B561%2C amino-terminal protein	7.82694	8.99563	8.84114	8.55457
AT1G07980	"NUCLEAR FACTOR Y, SUBUNIT C10" (NF-YC10)	9.73684	9.68859	10.9264	10.1173
AT1G07985	Expressed protein	1.53681	1.92436	1.40845	1.62321
AT1G07990	SIT4 phosphatase-associated family protein	10.8875	12.0153	11.3132	11.4053
AT1G08000	GATA TRANSCRIPTION FACTOR 10 (GATA10)	3.73438	4.24235	3.32858	3.76844
AT1G08010	GATA TRANSCRIPTION FACTOR 11 (GATA11)	6.49919	7.38291	5.35852	6.41354
AT1G08030	TYROSYLPROTEIN SULFOTRANSFERASE (TPST)	5.4386	5.2396	6.83468	5.83763
AT1G08040	trimethylguanosine synthase (DUF707)	7.89582	9.52648	9.72793	9.05008
AT1G08050	Zinc finger (C3HC4-type RING finger) family protein	9.82979	10.0124	20.3335	13.3919
AT1G08060	MORPHEUS MOLECULE (MOM)	5.49319	4.9054	5.74338	5.38065
AT1G08070	ORGANELLE TRANSCRIPT PROCESSING 82 (OTP82)	1.27091	0.993542	1.24711	1.17052
AT1G08110	ATGLYI2; GLYOXALASE12	22.4808	22.8196	18.9587	21.4197
AT1G08115		3.15635	5.69423	1.25564	3.36874
AT1G08120	TP53-regulating kinase-like protein	1.49303	1.8649	2.31195	1.88996
AT1G08125	S-adenosyl-L-methionine-dependent methyltransferases superfamily protein	6.48054	7.49793	6.58607	6.85485
AT1G08130	DNA LIGASE 1 (LIG1)	6.39527	7.35452	6.00737	6.58572
AT1G08180	cyclin-dependent kinase inhibitor	5.12657	6.17772	6.84208	6.04879
AT1G08190	VACUOLAR PROTEIN SORTING 41 (VPS41)	11.7833	11.2419	11.2755	11.4336
AT1G08200	UDP-D-APIOSE/UDP-D-XYLOSE SYNTHASE 2 (AXS2)	43.4308	43.3187	54.2695	47.0063
AT1G08210	Eukaryotic aspartyl protease family protein	6.42414	7.87255	5.73458	6.67709
AT1G08220	ATPase complex subunit	4.42344	4.69514	5.00138	4.70665
AT1G08230	Transmembrane amino acid transporter family protein	5.48266	2.68095	6.95592	5.03985
AT1G08250	AROGENATE DEHYDRATASE 6 (ADT6)	1.93107	3.34088	2.4494	2.57378
AT1G08260	TILTED 1 (TIL1)	4.26951	5.32981	4.65265	4.75066
AT1G08270	vacuolar protein sorting-associated protein	2.91245	3.72262	3.07008	3.23505
AT1G08280	GALT29A; GLYCOSYLTRANSFERASE 29A	6.31458	7.86796	5.69725	6.6266
AT1G08290	WIP DOMAIN PROTEIN 3 (WIP3)	6.85702	3.00197	6.44006	5.43301
AT1G08300	NO VEIN-LIKE (NVL)	1.52948	2.20936	1.68757	1.80881
AT1G08315	ARM repeat superfamily protein	32.838	23.5123	35.6939	30.6814
AT1G08350	Endomembrane protein 70 protein family	4.30169	4.87556	3.77681	4.31802
AT1G08360	Ribosomal protein L1p/L10e family	169.615	178.61	187.332	178.519
AT1G08370	DECAPPING 1 (DCP1)	18.0187	18.483	19.9557	18.8191
AT1G08380	PHOTOSYSTEM I SUBUNIT O (PSAO)	7.95178	0.378308	0.900944	3.07701
AT1G08390	recQ-mediated instability-like protein	1.45822	1.97917	0.986705	1.4747
AT1G08400	RINT-1 / TIP-1 family	3.23934	3.69304	3.32256	3.41831
AT1G08410	P-loop containing nucleoside triphosphate hydrolases superfamily protein	14.4217	14.141	13.6097	14.0575
AT1G08420	BRI1 SUPPRESSOR 1 (BSU1)-LIKE 2 (BSL2)	10.9012	9.99621	11.4634	10.7869
AT1G08430	ALUMINUM-ACTIVATED MALATE TRANSPORTER 1 (ALMT1)	7.45623	3.72733	3.50742	4.897
AT1G08440	aluminum activated malate transporter family protein	1.7844	2.45513	16.3819	6.87381
AT1G08450	CALRETICULIN 3 (CRT3)	23.0504	17.8411	30.7032	23.8649
AT1G08460	HISTONE DEACETYLASE 8 (HDA08)	13.6033	13.7297	10.6843	12.6724
AT1G08470	STRICTOSIDINE SYNTHASE-LIKE 3 (SSL3)	6.34999	6.92394	5.68815	6.32069
AT1G08480	SUCCINATE DEHYDROGENASE 6 (SDH6)	40.9758	39.5659	43.6869	41.4095
AT1G08490	CHLOROPLASTIC NIFS-LIKE CYSTEINE DESULFURASE (CPNIFS)	8.7746	8.61638	8.76124	8.7174
AT1G08510	FATTY ACYL-ACP THIOESTERASES B (FATB)	26.2642	23.4998	21.9141	23.8927
AT1G08520	ALBINA 1 (ALB1)	5.29704	4.15799	3.77933	4.41145
AT1G08530	chitinase-like protein	4.82283	5.44614	5.28699	5.18532
AT1G08540	RNAPOLYMERASE SIGMA SUBUNIT 2 (SIG2)	2.52647	2.31273	1.8255	2.22157
AT1G08550	NON-PHOTOCHEMICAL QUENCHING 1 (NPQ1)	2.48718	2.35804	2.79225	2.54582
AT1G08560	SYNTAXIN OF PLANTS 111 (SYP111)	22.2049	40.4104	16.5144	26.3766
AT1G08570	ATYPICAL CYS HIS RICH THIOREDOXIN 4 (ACHT4)	24.9568	20.2999	22.0776	22.4448
AT1G08580	hypothetical protein	19.0385	22.5283	25.1122	22.2263
AT1G08590	ATPXL1; PHLOEM INTERCALATED WITH XYLEM-LIKE 1; PXL1; PXY-LIKE1	1.06898	1.16067	0.803257	1.01097
AT1G08600	(ATRX)	7.14951	6.58478	8.0638	7.26603
AT1G08610	Pentatricopeptide repeat (PPR) superfamily protein	5.00489	5.45177	3.25386	4.57017
AT1G08620	(PKDM7D)	9.63991	9.91579	12.6998	10.7518
AT1G08630	THREONINE ALDOLASE 1 (THA1)	1.36822	0.584718	1.87602	1.27632
AT1G08640	CHLOROPLAST J-LIKE DOMAIN 1 (CJD1)	10.3498	10.1126	13.0478	11.1701
AT1G08650	PHOSPHOENOLPYRUVATE CARBOXYLASE KINASE 1 (PPCK1)	33.126	75.1639	26.9115	45.0671
AT1G08660	MALE GAMETOPHYTE DEFECTIVE 2 (MGP2)	13.2885	16.7477	11.7143	13.9169
AT1G08680	ARF GAP-LIKE ZINC FINGER-CONTAINING PROTEIN ZIGA4 (ZIGA4)	5.99219	6.62899	6.57313	6.3981
AT1G08700	PRESENILIN-1 (PS1)	25.1338	26.0524	27.9739	26.3867
AT1G08710	F-box family protein	5.38662	4.97903	4.10609	4.82391
AT1G08720	ENHANCED DISEASE RESISTANCE 1 (EDR1)	9.0768	8.58026	10.885	9.51402
AT1G08750	ATGPI8; GPI8	3.20304	3.49036	3.52794	3.40711
AT1G08760	GPI-anchored adhesin-like protein%2C putative (DUF936)	12.5198	13.0051	12.5952	12.7067
AT1G08770	PRENYLATED RAB ACCEPTOR 1.E (PRA1.E)	16.7544	12.9216	14.5799	14.752
AT1G08780	ABI3-INTERACTING PROTEIN 3 (AIP3)	10.4353	10.7208	10.8755	10.6772
AT1G08800	MYOB1; MYOSIN BINDING PROTEIN 1	21.3531	16.0673	23.0546	20.1583
AT1G08820	VAMP/SYNAPTOBREVIN-ASSOCIATED PROTEIN 27-2 (VAP27-2)	19.5289	17.1992	22.1657	19.6313
AT1G08830	COPPER/ZINC SUPEROXIDE DISMUTASE 1 (CSD1)	48.9529	29.9989	112.793	63.9148
AT1G08840	EMBRYO DEFECTIVE 2411 (emb2411)	1.3104	1.54155	1.15119	1.33438
AT1G08845	Ribosomal L18p/L5e family protein	1.88095	2.56832	2.24346	2.23091
AT1G08880	(H2AXA)	58.6263	64.7639	63.1965	62.1955
AT1G08890	Major facilitator superfamily protein	3.27716	3.09213	4.12737	3.49889
AT1G08910	zinc ion binding protein	7.07717	4.13592	9.54116	6.91808
AT1G08920	ERD (EARLY RESPONSE TO DEHYDRATION) SIX-LIKE 1 (ESL1)	10.4605	8.61475	15.8815	11.6523
AT1G08930	EARLY RESPONSE TO DEHYDRATION 6 (ERD6)	21.0389	18.2869	24.0611	21.129
AT1G08940	Phosphoglycerate mutase family protein	44.619	27.753	60.5285	44.3002
AT1G08960	CATION EXCHANGER 11 (CAX11)	6.41347	6.12603	5.13638	5.89196
AT1G08970	"NUCLEAR FACTOR Y, SUBUNIT C9" (NF-YC9)	23.9759	29.9606	24.3109	26.0825
AT1G08980	AMIDASE 1 (AMI1)	4.991	2.94271	2.6324	3.52204
AT1G08990	PLANT GLYCOGENIN-LIKE STARCH INITIATION PROTEIN 5 (PGSIP5)	1.0128	0.668756	1.59449	1.09201
AT1G09000	NPK1-RELATED PROTEIN KINASE 1 (NP1)	1.87463	2.35103	1.88891	2.03819
AT1G09010	glycoside hydrolase family 2 protein	12.9992	13.986	10.4045	12.4632
AT1G09020	HOMOLOG OF YEAST SUCROSE NONFERMENTING 4 (SNF4)	10.1568	9.98616	10.2702	10.1378
AT1G09040	arginine-glutamic acid dipeptide repeat protein	2.06904	2.01427	1.96738	2.01689
AT1G09050	arginine-glutamic acid dipeptide repeat protein	2.61631	2.72642	2.49731	2.61334
AT1G09060	JMJ24	10.6765	11.013	11.1035	10.931
AT1G09070	SOYBEAN GENE REGULATED BY COLD-2 (SRC2)	136.747	76.7871	150.873	121.469
AT1G09080	BINDING PROTEIN 3 (BIP3)	3.26694	0.450983	3.15387	2.2906
AT1G09090	RESPIRATORY BURST OXIDASE HOMOLOG B (RBOHB)	1.66672	0.73516	1.59643	1.33277
AT1G09100	26S PROTEASOME AAA-ATPASE SUBUNIT RPT5B (RPT5B)	19.8028	18.9777	23.9096	20.8967
AT1G09130	ATP-dependent caseinolytic (Clp) protease/crotonase family protein	16.3602	14.5864	19.6213	16.856
AT1G09140	SERINE/ARGININE-RICH PROTEIN SPLICING FACTOR 30 (SR30)	26.7682	24.5095	23.6996	24.9924
AT1G09150	pseudouridine synthase and archaeosine transglycosylase (PUA) domain-containing protein	10.6368	11.3197	9.61198	10.5228
AT1G09160	Protein phosphatase 2C family protein	10.2651	10.3023	8.40412	9.65718
AT1G09180	SECRETION-ASSOCIATED RAS SUPER FAMILY 1 (SARA1A)	0.984213	0.372223	3.19037	1.5156
AT1G09190	Tetratricopeptide repeat (TPR)-like superfamily protein	2.96026	2.5576	3.10399	2.87395
AT1G09195	Ppx-GppA phosphatase	1.71586	2.44937	1.39457	1.85326
AT1G09200	Histone superfamily protein	108.788	121.552	101.472	110.604
AT1G09210	CALRETICULIN 1B (CRT1b)	43.4096	41.0181	48.2176	44.2151
AT1G09220	Pentatricopeptide repeat (PPR) superfamily protein	2.00607	1.643	1.94305	1.86404
AT1G09230	RNA-binding (RRM/RBD/RNP motifs) family protein	4.97802	5.47637	4.88715	5.11385
AT1G09250	basic helix-loop-helix (bHLH) DNA-binding superfamily protein	22.3464	30.6704	15.7334	22.9167
AT1G09270	IMPORTIN ALPHA ISOFORM 4 (IMPA-4)	16.2773	18.506	16.7787	17.1873
AT1G09280	rhodanese-like domain protein	12.1064	14.4565	12.0998	12.8876
AT1G09290	hypothetical protein	5.7566	7.13275	5.70571	6.19835
AT1G09300	ATICP55	2.40239	2.85399	2.93546	2.73062
AT1G09310	plant/protein (Protein of unknown function%2C DUF538)	9.62169	11.1865	7.83116	9.54644
AT1G09320	agenet domain-containing protein	5.70388	5.58378	4.7852	5.35762
AT1G09330	golgi apparatus membrane protein-like protein ECHIDNA protein	14.4464	13.6192	15.5484	14.538
AT1G09340	CHLOROPLAST RNA BINDING (CRB)	1.36194	0.819758	0.895661	1.02579
AT1G09380	UMAMIT25; USUALLY MULTIPLE ACIDS MOVE IN AND OUT TRANSPORTERS 25	9.09933	0.742835	14.3074	8.04986
AT1G09390	GDSL-like Lipase/Acylhydrolase superfamily protein	5.17468	1.5762	3.11957	3.29015
AT1G09410	pentatricopeptide (PPR) repeat-containing protein	1.35885	1.18321	0.902777	1.14828
AT1G09415	NIM1-INTERACTING 3 (NIMIN-3)	7.31586	7.95715	6.70797	7.32699
AT1G09420	GLUCOSE-6-PHOSPHATE DEHYDROGENASE 4 (G6PD4)	2.19248	2.40663	2.36568	2.3216
AT1G09430	ATP-CITRATE LYASE A-3 (ACLA-3)	15.5699	19.4674	18.4188	17.8187
AT1G09450	HASPIN-RELATED GENE (Haspin)	2.00437	2.8162	1.90031	2.2403
AT1G09460	Carbohydrate-binding X8 domain superfamily protein	27.3976	72.7442	6.95227	35.698
AT1G09470	ATNEAP3	1.66076	3.37012	0.948892	1.99326
AT1G09480	NAD(P)-binding Rossmann-fold superfamily protein	4.23004	5.50435	6.86623	5.53354
AT1G09486		5.47572	6.94329	6.63983	6.35295
AT1G09490	NAD(P)-binding Rossmann-fold superfamily protein	8.85907	10.9333	11.6396	10.4773
AT1G09500	NAD(P)-binding Rossmann-fold superfamily protein	2.72196	2.51655	8.93947	4.72599
AT1G09520	hypothetical protein	21.6166	28.0357	22.5871	24.0798
AT1G09530	PHYTOCHROME INTERACTING FACTOR 3 (PIF3)	2.9041	1.45532	2.20055	2.18666
AT1G09540	MYB DOMAIN PROTEIN 61 (MYB61)	2.56539	2.16504	0.313122	1.68119
AT1G09560	GERMIN-LIKE PROTEIN 5 (GLP5)	85.7484	45.0144	135.648	88.8037
AT1G09570	PHYTOCHROME A (PHYA)	47.21	51.9241	38.729	45.9544
AT1G09575	calcium uniporter-like protein (DUF607)	5.83212	4.87571	6.80745	5.83843
AT1G09580	emp24/gp25L/p24 family/GOLD family protein	3.25988	2.73544	2.6636	2.88631
AT1G09590	Translation protein SH3-like family protein	148.232	184.179	181.727	171.379
AT1G09620	ATP binding/leucine-tRNA ligases/aminoacyl-tRNA ligase	52.9656	57.5267	48.4156	52.9693
AT1G09630	RAB GTPASE 11C (RAB11c)	20.7791	21.8672	27.7025	23.4496
AT1G09640	Translation elongation factor EF1B%2C gamma chain	141.263	160.645	175.285	159.064
AT1G09645	transmembrane protein	10.6398	10.3349	10.0892	10.3546
AT1G09660	RNA-binding KH domain-containing protein	8.89574	8.75565	10.3604	9.33725
AT1G09680	Pentatricopeptide repeat (PPR) superfamily protein	3.54022	3.64974	3.5575	3.58249
AT1G09690	Translation protein SH3-like family protein	210.861	261.341	260.283	244.162
AT1G09700	HYPONASTIC LEAVES 1 (HYL1)	8.99041	10.2397	8.91652	9.38221
AT1G09730	ARABIDOPSIS SUMO PROTEASE 1; ASP1	9.75701	9.85346	9.81012	9.80687
AT1G09740	Adenine nucleotide alpha hydrolases-like superfamily protein	14.0565	10.5523	24.4702	16.3597
AT1G09760	U2 SMALL NUCLEAR RIBONUCLEOPROTEIN A (U2A')	17.653	18.9426	19.2482	18.6146
AT1G09770	CELL DIVISION CYCLE 5 (CDC5)	86.5109	103.624	84.4395	91.525
AT1G09780	2,3-BIPHOSPHOGLYCERATE-INDEPENDENT PHOSPHOGLYCERATE MUTASE 1 (iPGAM1)	80.229	61.8605	90.8443	77.6446
AT1G09794	Cox19 family protein (CHCH motif)	2.63961	2.1429	3.1802	2.65424
AT1G09795	ATP PHOSPHORIBOSYL TRANSFERASE 2 (ATP-PRT2)	4.23098	4.71658	4.16223	4.36993
AT1G09800	Pseudouridine synthase family protein	2.01039	1.59001	1.75307	1.78449
AT1G09810	EVOLUTIONARILY CONSERVED C-TERMINAL REGION 11 (ECT11)	5.92105	5.1326	5.57855	5.54407
AT1G09812	multidrug resistance protein	4.26426	4.04484	2.07673	3.46195
AT1G09815	POLYMERASE DELTA 4 (POLD4)	49.6954	51.2598	48.9448	49.9667
AT1G09820	Pentatricopeptide repeat (PPR-like) superfamily protein	3.83952	4.0478	3.71059	3.86597
AT1G09830	PURINE BIOSYNTHESIS 2 (PUR2)	13.5503	15.0204	13.6794	14.0834
AT1G09840	SHAGGY-LIKE PROTEIN KINASE 41 (SK41)	29.8041	29.9609	27.7394	29.1681
AT1G09850	XYLEM BARK CYSTEINE PEPTIDASE 3 (XBCP3)	9.91353	7.61531	9.33175	8.95353
AT1G09870	histidine acid phosphatase family protein	11.8082	12.1037	10.8112	11.5744
AT1G09900	Pentatricopeptide repeat (PPR-like) superfamily protein	4.84541	5.48414	4.86742	5.06566
AT1G09910	Rhamnogalacturonate lyase family protein	4.80713	5.99012	4.54035	5.11254
AT1G09920	TRAF-type zinc finger-like protein	9.30302	8.24435	11.0697	9.53902
AT1G09932	Phosphoglycerate mutase family protein	1.95524	1.45074	4.05297	2.48632
AT1G09940	(HEMA2)	15.7907	10.654	17.9337	14.7928
AT1G09950	RESPONSE TO ABA AND SALT 1 (RAS1)	3.35718	2.42518	2.45601	2.74612
AT1G09960	SUCROSE TRANSPORTER 4 (SUT4)	5.48586	7.66149	3.70337	5.61691
AT1G09970	(LRR XI-23)	171.815	230.265	150.881	184.32
AT1G09980	Putative serine esterase family protein	11.1244	12.165	12.1631	11.8175
AT1G09995	DNA repair DEAD helicase RAD3/XP-D subfamily protein	4.28095	4.71041	4.21011	4.40049
AT1G10020	formin-like protein (DUF1005)	16.8952	18.2055	16.0239	17.0415
AT1G10030	HOMOLOG OF YEAST ERGOSTEROL28 (ERG28)	4.84803	6.16352	4.0622	5.02458
AT1G10040	alpha/beta-Hydrolases superfamily protein	2.54507	2.91933	1.52904	2.33115
AT1G10050	glycosyl hydrolase family 10 protein / carbohydrate-binding domain-containing protein	5.43735	6.08335	6.77883	6.09984
AT1G10070	BRANCHED-CHAIN AMINO ACID TRANSAMINASE 2 (BCAT-2)	6.99537	3.3972	9.10881	6.50046
AT1G10090	Early-responsive to dehydration stress protein (ERD4)	2.0743	2.09936	1.74808	1.97391
AT1G10095	Protein prenylyltransferase superfamily protein	1.58269	1.68035	1.1279	1.46364
AT1G10120	CIB4; CRY2-INTERACTING BHLH 4	3.77034	5.34187	1.54787	3.55336
AT1G10130	ENDOPLASMIC RETICULUM-TYPE CALCIUM-TRANSPORTING ATPASE 3 (ECA3)	5.29792	5.9037	5.68381	5.62848
AT1G10140	Uncharacterized conserved protein UCP031279	134.985	137.341	109.086	127.137
AT1G10150	Carbohydrate-binding protein	13.2716	9.64872	16.0482	12.9895
AT1G10170	NF-X-LIKE 1 (NFXL1)	41.5227	31.2341	46.8419	39.8662
AT1G10180	LOW protein: exocyst complex component-like protein	11.8652	15.2396	10.9705	12.6918
AT1G10200	WLIM1 (WLIM1)	43.5939	33.5442	28.5268	35.2216
AT1G10210	MITOGEN-ACTIVATED PROTEIN KINASE 1 (MPK1)	4.95916	6.15917	3.35911	4.82582
AT1G10230	SKP1-LIKE 18 (SK18)	18.7015	18.8624	25.6007	21.0549
AT1G10240	FAR1-RELATED SEQUENCE 11 (FRS11)	4.9068	4.52132	3.92145	4.44986
AT1G10250	paired amphipathic helix Sin3-like protein	2.25026	1.67589	1.92809	1.95141
AT1G10270	GLUTAMINE-RICH PROTEIN 23 (GRP23)	13.9536	14.5452	14.842	14.4469
AT1G10280	Core-2/I-branching beta-1%2C6-N-acetylglucosaminyltransferase family protein	2.72208	2.68152	3.00861	2.80407
AT1G10290	DYNAMIN-LIKE PROTEIN 6 (ADL6)	16.6635	14.9826	19.0659	16.904
AT1G10300	Nucleolar GTP-binding protein	0.791781	4.74874	3.44388	2.9948
AT1G10310	NAD(P)-binding Rossmann-fold superfamily protein	4.15427	3.64761	3.97332	3.92507
AT1G10320	Zinc finger C-x8-C-x5-C-x3-H type family protein	7.18672	7.26725	7.42627	7.29341
AT1G10350	DNAJ heat shock family protein	7.5572	9.81763	9.49837	8.95773
AT1G10370	EARLY-RESPONSIVE TO DEHYDRATION 9 (ERD9)	1.15458	0.324812	2.89681	1.45873
AT1G10390	DRA2; DRACULA2	26.9872	28.411	32.4168	29.2717
AT1G10400	UDP-Glycosyltransferase superfamily protein	12.3603	13.5075	0.526417	8.79806
AT1G10410	CW14 protein (DUF1336)	29.7765	23.6486	31.371	28.2654
AT1G10430	PROTEIN PHOSPHATASE 2A-2 (PP2A-2)	11.716	12.957	12.9539	12.5423
AT1G10450	SIN3-LIKE 6 (SNL6)	10.6107	10.3709	12.4066	11.1294
AT1G10460	GERMIN-LIKE PROTEIN 7 (GLP7)	11.9478	16.7133	9.93649	12.8659
AT1G10470	RESPONSE REGULATOR 4 (ARR4)	61.7339	78.0221	65.5761	68.4441
AT1G10480	ZINC FINGER PROTEIN 5 (ZFP5)	17.3962	17.4664	13.3093	16.0573
AT1G10490	GNAT acetyltransferase (DUF699)	4.58458	6.28037	5.46434	5.4431
AT1G10500	CHLOROPLAST-LOCALIZED ISCA-LIKE PROTEIN (CPISCA)	17.3524	14.5157	19.2188	17.029
AT1G10510	EMBRYO DEFECTIVE 2004 (emb2004)	4.42997	4.68046	4.68849	4.59964
AT1G10522	PLASTID REDOX INSENSITIVE 2 (PRIN2)	5.35576	3.9082	5.02123	4.76173
AT1G10530	D-ribose-binding periplasmic protein	6.97458	6.56919	8.47415	7.33931
AT1G10540	NUCLEOBASE-ASCORBATE TRANSPORTER 8 (NAT8)	10.7139	6.00124	6.93091	7.88201
AT1G10570	OVERLY TOLERANT TO SALT 2 (OTS2)	13.2924	12.2571	11.3711	12.3069
AT1G10580	Transducin/WD40 repeat-like superfamily protein	24.9615	25.7179	25.052	25.2438
AT1G10585	basic helix-loop-helix (bHLH) DNA-binding superfamily protein	17.3979	7.31083	36.243	20.3172
AT1G10590	Nucleic acid-binding%2C OB-fold-like protein	71.3791	81.0065	68.7603	73.7153
AT1G10600	ASSOCIATED MOLECULE WITH THE SH3 DOMAIN OF STAM 2 (AMSH2)	3.44324	3.98248	3.50517	3.64363
AT1G10610	basic helix-loop-helix (bHLH) DNA-binding superfamily protein	1.29988	1.8094	1.15371	1.42099
AT1G10630	ADP-RIBOSYLATION FACTOR A1F (ARFA1F)	33.3185	35.1188	38.4435	35.6269
AT1G10650	SBP (S-ribonuclease binding protein) family protein	5.58281	5.03679	8.38457	6.33472
AT1G10660	transmembrane protein	5.25464	4.98477	5.53602	5.25848
AT1G10670	ATP-CITRATE LYASE A-1 (ACLA-1)	38.8151	37.1511	43.8965	39.9542
AT1G10682	SHORT OPEN READING FRAME 1; SORF1	3.28028	4.53881	10.0649	5.96134
AT1G10690	cyclin-dependent kinase inhibitor	10.9172	10.4815	7.58436	9.661
AT1G10700	PHOSPHORIBOSYL PYROPHOSPHATE (PRPP) SYNTHASE 3 (PRS3)	8.80826	7.74487	10.925	9.15937
AT1G10720	BSD domain-containing protein	15.4255	15.3914	14.2097	15.0089
AT1G10730	ADAPTOR PROTEIN-1 MU-ADAPTIN 1; AP1M1	5.87655	5.42119	4.92511	5.40762
AT1G10740	alpha/beta-Hydrolases superfamily protein	8.09144	9.55792	6.58631	8.07856
AT1G10750	carboxyl-terminal peptidase%2C putative (DUF239)	1.59317	3.7472	0.277281	1.87255
AT1G10760	STARCH EXCESS 1 (SEX1)	14.5193	11.7946	9.5303	11.9481
AT1G10780	F-box/RNI-like superfamily protein	2.19266	3.10521	2.1545	2.48413
AT1G10820	hypothetical protein (DUF3755)	3.72685	4.30572	3.69043	3.90767
AT1G10830	15-CIS-ZETA-CAROTENE ISOMERASE (Z-ISO)	4.33407	3.56706	5.15426	4.3518
AT1G10840	TRANSLATION INITIATION FACTOR 3 SUBUNIT H1 (TIF3H1)	42.6554	47.3522	46.6724	45.56
AT1G10850	Leucine-rich repeat protein kinase family protein	3.64343	5.38936	2.43358	3.82212
AT1G10865	cytochrome C oxidase assembly factor	9.48237	11.7712	13.4127	11.5554
AT1G10870	ARF-GAP DOMAIN 4 (AGD4)	3.91137	4.17641	3.97209	4.01996
AT1G10890	arginine/glutamate-rich 1 protein	22.7407	25.4892	23.5999	23.9433
AT1G10900	Phosphatidylinositol-4-phosphate 5-kinase family protein	4.12564	3.64939	3.94973	3.90825
AT1G10910	EMBRYO DEFECTIVE 3103 (EMB3103)	4.988	5.36042	3.93534	4.76125
AT1G10920	(LOV1)	1.204	2.10256	0.382652	1.22974
AT1G10930	(RECQ4A)	2.39346	2.60668	1.96093	2.32036
AT1G10940	SNF1-RELATED PROTEIN KINASE 2.4 (SNRK2.4)	33.3691	35.9176	37.6409	35.6425
AT1G10950	TRANSMEMBRANE NINE 1 (TMN1)	35.2602	34.9369	39.2005	36.4658
AT1G10960	FERREDOXIN 1 (FD1)	35.3396	6.04163	24.1048	21.8287
AT1G10970	ZINC TRANSPORTER 4 PRECURSOR (ZIP4)	4.6753	4.49326	4.63699	4.60185
AT1G10990	transmembrane protein	51.9517	77.3114	55.0556	61.4396
AT1G11000	MILDEW RESISTANCE LOCUS O 4 (MLO4)	4.65882	6.87918	4.36298	5.30033
AT1G11020	RING/FYVE/PHD zinc finger superfamily protein	10.4034	10.5542	8.05223	9.66995
AT1G11050	Protein kinase superfamily protein	12.8873	9.66797	11.0085	11.1879
AT1G11060	ATWAPL1; WAPL1; WINGS APART-LIKE PROTEIN 1	5.10223	5.58488	5.26639	5.31783
AT1G11090	alpha/beta-Hydrolases superfamily protein	15.3199	12.6983	13.0344	13.6842
AT1G11100	FRG5; SNF2-RING-HELICASE?LIKE 5	5.9958	5.39238	7.40538	6.26452
AT1G11120	CTTNBP 2 amino-terminal-like protein	1.2579	1.78421	1.11368	1.38526
AT1G11125	hypothetical protein	2.9722	5.11378	2.1458	3.41059
AT1G11130	STRUBBELIG (SUB)	11.3307	12.1717	10.6223	11.3749
AT1G11170	lysine ketoglutarate reductase trans-splicing-like protein (DUF707)	1.00111	0.80587	1.38348	1.06348
AT1G11175		8.12854	7.22482	4.61375	6.65571
AT1G11185		36.218	55.9442	29.3518	40.5047
AT1G11190	BIFUNCTIONAL NUCLEASE I (BFN1)	7.90469	1.57425	7.69448	5.72447
AT1G11200	organic solute transporter ostalpha protein (DUF300)	6.93578	7.32598	6.81617	7.02598
AT1G11210	cotton fiber protein%2C putative (DUF761)	6.88477	1.36067	10.1553	6.13357
AT1G11220	cotton fiber%2C putative (DUF761)	1.54609	2.67638	0.623966	1.61548
AT1G11240	ribosomal RNA-processing protein	22.5161	27.676	24.1957	24.7959
AT1G11260	SUGAR TRANSPORTER 1 (STP1)	18.2642	15.7882	16.5771	16.8765
AT1G11280	S-locus lectin protein kinase family protein	4.82445	7.09055	2.35966	4.75822
AT1G11290	CHLORORESPIRATORY REDUCTION22 (CRR22)	1.49701	1.36029	1.39794	1.41841
AT1G11310	MILDEW RESISTANCE LOCUS O 2 (MLO2)	18.8931	16.1235	22.1347	19.0504
AT1G11320	GDSL esterase/lipase	1.83871	2.59465	1.48952	1.9743
AT1G11330	S-locus lectin protein kinase family protein	21.3324	27.4309	16.0688	21.6107
AT1G11350	S-DOMAIN-1 13 (SD1-13)	3.01276	1.59722	2.56243	2.39081
AT1G11360	Adenine nucleotide alpha hydrolases-like superfamily protein	23.3875	26.6764	20.7738	23.6126
AT1G11380	PLAC8 family protein	4.34837	4.42909	2.83923	3.87223
AT1G11390	Protein kinase superfamily protein	6.07689	5.71632	6.53667	6.10996
AT1G11400	PARTNER OF Y14-MAGO (PYM)	13.4343	15.9026	15.322	14.8863
AT1G11410	S-locus lectin protein kinase family protein	1.62482	0.542282	1.86801	1.34504
AT1G11420	DOMAIN OF UNKNOWN FUNCTION 724 2 (DUF2)	11.1674	10.2899	11.0848	10.8473
AT1G11430	MULTIPLE ORGANELLAR RNA EDITING FACTOR 9 (MORF9)	7.3047	6.76635	7.21481	7.09529
AT1G11475	(NRPB10)	15.2808	15.9208	15.0067	15.4028
AT1G11480	eukaryotic translation initiation factor-like protein	41.8004	40.3872	47.8963	43.3613
AT1G11520	pliceosome associated protein-like protein	18.7129	16.9613	21.305	18.9931
AT1G11545	XYLOGLUCAN ENDOTRANSGLUCOSYLASE/HYDROLASE 8 (XTH8)	6.7242	6.77086	3.91783	5.8043
AT1G11580	METHYLESTERASE PCR A (PMEPCRA)	759.18	1525.77	821.081	1035.34
AT1G11592		3.79727	5.07471	3.08804	3.98667
AT1G11600	"CYTOCHROME P450, FAMILY 77, SUBFAMILY B, POLYPEPTIDE 1" (CYP77B1)	12.5883	19.1942	0.884405	10.889
AT1G11630	Tetratricopeptide repeat (TPR)-like superfamily protein	7.71214	8.59579	7.4963	7.93474
AT1G11650	(RBP45B)	53.2988	46.81	55.2198	51.7762
AT1G11660	heat shock protein 70 (Hsp 70) family protein	12.021	11.8536	14.7605	12.8784
AT1G11670	MATE efflux family protein	27.9696	31.2306	26.4645	28.5549
AT1G11680	CYTOCHROME P450 51G1 (CYP51G1)	102.635	116.884	90.7507	103.423
AT1G11700	senescence regulator (Protein of unknown function%2C DUF584)	2.16559	0.210368	1.32207	1.23268
AT1G11710	Pentatricopeptide repeat (PPR) superfamily protein	2.21405	2.71348	2.11408	2.3472
AT1G11720	STARCH SYNTHASE 3 (SS3)	7.91387	9.97434	10.5558	9.48135
AT1G11735	MICRORNA171B (MIR171B)	0.874067	3.41654	0.695429	1.66201
AT1G11750	CLP PROTEASE PROTEOLYTIC SUBUNIT 6 (CLPP6)	8.18615	8.02423	8.51022	8.2402
AT1G11755	LEAF WILTING 1 (LEW1)	3.09097	2.97524	2.87227	2.97949
AT1G11760	(MED32)	8.6376	10.0454	7.79615	8.8264
AT1G11780	oxidoreductase%2C 2OG-Fe(II) oxygenase family protein	4.7541	4.96391	3.92673	4.54825
AT1G11790	AROGENATE DEHYDRATASE 1 (ADT1)	3.93217	3.94047	6.68987	4.85417
AT1G11800	endonuclease/exonuclease/phosphatase family protein	5.09137	4.79242	5.39547	5.09308
AT1G11820	O-Glycosyl hydrolases family 17 protein	8.29874	10.5505	6.67498	8.50807
AT1G11840	GLYOXALASE I HOMOLOG (GLX1)	98.5214	76.5243	121.052	98.6992
AT1G11860	Glycine cleavage T-protein family	21.6136	25.9794	24.9682	24.1871
AT1G11870	SERYL-TRNA SYNTHETASE (SRS)	3.42771	3.50095	3.1489	3.35918
AT1G11880	transferases%2C transferring hexosyl groups	2.73558	3.03658	2.69826	2.82347
AT1G11890	SECRETION 22 (SEC22)	14.516	11.3654	15.0111	13.6309
AT1G11900	Tetratricopeptide repeat (TPR)-like superfamily protein	1.60039	1.91072	1.32916	1.61342
AT1G11905	B-cell receptor-associated protein 31-like protein	9.65911	9.89263	10.4468	9.99953
AT1G11910	ASPARTIC PROTEINASE A1 (APA1)	89.4548	74.1487	104.646	89.4166
AT1G11925	Stigma-specific Stig1 family protein	0.30929	0.0382925	2.68515	1.01091
AT1G11930	Putative pyridoxal phosphate-dependent enzyme%2C YBL036C type	16.6777	16.2922	16.6986	16.5562
AT1G11940	Core-2/I-branching beta-1%2C6-N-acetylglucosaminyltransferase family protein	4.62486	3.91572	5.37563	4.63873
AT1G11950	Transcription factor jumonji (jmjC) domain-containing protein	3.78892	4.99337	3.94929	4.24386
AT1G11960	ERD (early-responsive to dehydration stress) family protein	2.5365	2.62877	3.59022	2.9185
AT1G12000	Phosphofructokinase family protein	61.4671	55.945	87.8187	68.4102
AT1G12020	hypothetical protein	27.9847	37.6112	41.9133	35.8364
AT1G12030	phosphoenolpyruvate carboxylase%2C putative (DUF506)	6.29731	6.0947	10.4925	7.62816
AT1G12040	LEUCINE-RICH REPEAT/EXTENSIN 1 (LRX1)	0.400503	3.91909	0.940494	1.75336
AT1G12050	ATFAH; FAH; FUMARYLACETOACETATE HYDROLASE; SHORT-DAY SENSITIVE CELL DEATHSHORT-DAY SENSITIVE CELL DEATHSHORT-DAY SENSITIVE CELL DEATH 111; SSCD1	11.7814	8.69705	11.7539	10.7441
AT1G12060	BCL-2-ASSOCIATED ATHANOGENE 5 (BAG5)	3.13381	2.20651	4.36334	3.23455
AT1G12080	Vacuolar calcium-binding protein-like protein	0.33053	4.45232	0.161074	1.64798
AT1G12110	NITRATE TRANSPORTER 1.1 (NRT1.1)	19.2297	33.5257	19.5301	24.0952
AT1G12120	hypothetical protein (DUF863)	26.0786	27.2047	23.3234	25.5355
AT1G12130	FMOGS-OX6	1.13515	0.715403	1.88412	1.24489
AT1G12140	FLAVIN-MONOOXYGENASE GLUCOSINOLATE S-OXYGENASE 5 (FMO GS-OX5)	11.8297	10.2814	24.1801	15.4304
AT1G12160	Flavin-binding monooxygenase family protein	8.25155	13.813	8.82514	10.2966
AT1G12200	FLAVIN MONOOXYGENASE (FMO)	72.6959	124.603	92.8479	96.7156
AT1G12210	RPS5-LIKE 1 (RFL1)	3.24837	2.88632	3.55858	3.23109
AT1G12220	RESISTANT TO P. SYRINGAE 5 (RPS5)	2.85627	3.05187	3.02683	2.97832
AT1G12230	Aldolase superfamily protein	13.1367	11.9319	8.87919	11.3159
AT1G12240	(ATBETAFRUCT4)	2.51722	0.681511	5.3999	2.86621
AT1G12244	Polynucleotidyl transferase%2C ribonuclease H-like superfamily protein	1.82487	2.01976	1.41644	1.75369
AT1G12270	HOP1 (Hop1)	25.3515	27.5043	24.6114	25.8224
AT1G12280	SUPPRESSOR OF MKK1 MKK2 2 (SUMM2)	2.45395	3.2982	1.81822	2.52345
AT1G12290	Disease resistance protein (CC-NBS-LRR class) family	1.5834	2.06929	1.06149	1.57139
AT1G12300	Tetratricopeptide repeat (TPR)-like superfamily protein	2.14437	2.65371	1.61587	2.13798
AT1G12310	Calcium-binding EF-hand family protein	79.107	85.0936	78.3551	80.8519
AT1G12320	ankyrin repeat/KH domain protein (DUF1442)	4.93881	7.79614	4.83827	5.85774
AT1G12340	Cornichon family protein	3.08155	3.44454	2.71217	3.07942
AT1G12350	4-PHOSPHO-PANTO-THENOYLCYSTEINE SYNTHETASE (COAB)	7.24969	6.49071	7.4216	7.054
AT1G12360	KEULE (KEU)	12.2234	12.933	14.1311	13.0958
AT1G12370	PHOTOLYASE 1 (PHR1)	1.3374	2.11115	1.09676	1.5151
AT1G12380	hypothetical protein	7.87209	13.4734	6.83712	9.39419
AT1G12390	Cornichon family protein	7.18696	8.46282	6.39992	7.3499
AT1G12400	Nucleotide excision repair%2C TFIIH%2C subunit TTDA	5.30434	5.81863	4.7776	5.30019
AT1G12410	CLP PROTEASE PROTEOLYTIC SUBUNIT 2 (CLP2)	17.9079	18.6695	18.4091	18.3288
AT1G12420	ACT DOMAIN REPEAT 8 (ACR8)	17.1872	27.1668	11.7199	18.6913
AT1G12430	ARMADILLO REPEAT KINESIN 3 (ARK3)	6.90453	8.39748	6.07079	7.12427
AT1G12440	A20/AN1-like zinc finger family protein	54.3651	42.9225	49.5685	48.9521
AT1G12450	SNARE associated Golgi protein family	4.21992	3.03659	3.07653	3.44435
AT1G12460	Leucine-rich repeat protein kinase family protein	2.31107	2.43663	1.90662	2.21811
AT1G12470	zinc ion binding protein	7.34719	7.63041	7.65877	7.54546
AT1G12500	Nucleotide-sugar transporter family protein	7.2623	6.75014	6.40832	6.80692
AT1G12520	COPPER CHAPERONE FOR SOD1 (CCS)	29.3713	18.8191	50.7695	32.9866
AT1G12530	hypothetical protein	5.23734	4.48776	5.30545	5.01018
AT1G12560	EXPANSIN A7 (EXPA7)	0.317366	3.31758	0.471341	1.36876
AT1G12580	PHOSPHOENOLPYRUVATE CARBOXYLASE-RELATED KINASE 1 (PEPKR1)	18.9858	18.5899	16.8852	18.1536
AT1G12600	UDP-N-acetylglucosamine (UAA) transporter family	1.41998	0.764411	1.47522	1.21987
AT1G12620	Pentatricopeptide repeat (PPR) superfamily protein	1.61284	2.54903	1.5107	1.89086
AT1G12640	LYSOPHOSPHOLIPID ACYLTRANSFERASE 1 (LPLAT1)	22.0404	16.1595	22.5333	20.2444
AT1G12650	rRNA biogenesis RRP36-like protein	14.3557	16.2051	16.9854	15.8487
AT1G12680	PHOSPHOENOLPYRUVATE CARBOXYLASE-RELATED KINASE 2 (PEPKR2)	10.1168	10.0185	8.90098	9.67875
AT1G12700	RNA PROCESSING FACTOR 1 (RPF1)	0.894024	1.45553	0.856707	1.06876
AT1G12710	PHLOEM PROTEIN 2-A12 (PP2-A12)	1.81046	2.22281	1.34208	1.79178
AT1G12730	GPI transamidase subunit PIG-U	1.30716	1.99915	1.0643	1.45687
AT1G12740	"CYTOCHROME P450, FAMILY 87, SUBFAMILY A, POLYPEPTIDE 2" (CYP87A2)	15.8741	20.1789	7.10682	14.3866
AT1G12750	RHOMBOID-LIKE PROTEIN 6 (RBL6)	2.83538	4.25739	3.33344	3.4754
AT1G12760	Zinc finger%2C C3HC4 type (RING finger) family protein	22.0312	20.1424	19.0539	20.4092
AT1G12770	EMBRYO DEFECTIVE 1586 (EMB1586)	8.27978	9.58116	9.80603	9.22232
AT1G12775	Pentatricopeptide repeat (PPR) superfamily protein	1.6746	2.02815	1.55776	1.7535
AT1G12780	UDP-D-GLUCOSE/UDP-D-GALACTOSE 4-EPIMERASE 1 (UGE1)	92.7512	33.4296	43.7385	56.6398
AT1G12790	DNA ligase-like protein	4.24788	3.63712	3.76726	3.88409
AT1G12800	S1 DOMAIN-CONTAINING RBP; SDP	6.64977	6.39618	5.70267	6.24954
AT1G12805	nucleotide binding protein	215.985	365.37	211.503	264.286
AT1G12810	proline-rich family protein	62.1856	97.9862	50.5482	70.24
AT1G12820	AUXIN SIGNALING F-BOX 3 (AFB3)	16.4024	15.3441	13.5582	15.1016
AT1G12830	nucleolin	30.7416	30.5652	32.1574	31.1547
AT1G12840	DE-ETIOLATED 3 (DET3)	29.6084	27.4997	36.194	31.1007
AT1G12850	Phosphoglycerate mutase family protein	26.4288	25.5461	27.2462	26.407
AT1G12880	NUDIX HYDROLASE HOMOLOG 12 (NUDT12)	19.3541	15.0123	5.98188	13.4494
AT1G12890	Integrase-type DNA-binding superfamily protein	54.0105	39.1815	16.9819	36.7246
AT1G12900	GLYCERALDEHYDE 3-PHOSPHATE DEHYDROGENASE A SUBUNIT 2 (GAPA-2)	1.72228	0.740746	1.77244	1.41182
AT1G12910	ANTHOCYANIN11 (ATAN11)	32.6434	36.2043	26.9759	31.9412
AT1G12920	EUKARYOTIC RELEASE FACTOR 1-2 (ERF1-2)	72.5801	97.7517	71.0734	80.4684
AT1G12930	ARM repeat superfamily protein	4.80246	5.29419	4.40808	4.83491
AT1G12940	NITRATE TRANSPORTER2.5 (NRT2.5)	1.99827	12.1954	3.57322	5.92231
AT1G12950	ROOT HAIR SPECIFIC 2 (RSH2)	12.2466	13.6918	15.9597	13.966
AT1G12970	PLANT INTRACELLULAR RAS GROUP-RELATED LRR 3 (PIRL3)	7.22996	7.03648	7.02958	7.09867
AT1G12980	ENHANCER OF SHOOT REGENERATION 1 (ESR1)	10.2781	3.49867	14.2617	9.34616
AT1G12990	beta-1%2C4-N-acetylglucosaminyltransferase family protein	4.6539	4.55679	4.53421	4.58163
AT1G13000	transmembrane protein%2C putative (DUF707)	6.49452	6.20995	7.32335	6.67594
AT1G13020	EUKARYOTIC INITIATION FACTOR 4B2 (EIF4B2)	15.6559	20.5384	14.5711	16.9218
AT1G13030	sphere organelles protein-like protein	6.14516	7.05194	6.43375	6.54362
AT1G13040	Pentatricopeptide repeat (PPR-like) superfamily protein	3.76987	5.54033	5.22277	4.84432
AT1G13050	proline-rich receptor-like kinase	3.65963	4.25989	4.12232	4.01395
AT1G13060	20S PROTEASOME BETA SUBUNIT E1 (PBE1)	37.1348	36.414	40.736	38.0949
AT1G13080	"CYTOCHROME P450, FAMILY 71, SUBFAMILY B, POLYPEPTIDE 2" (CYP71B2)	7.72858	2.9363	15.3104	8.65843
AT1G13090	"CYTOCHROME P450, FAMILY 71, SUBFAMILY B, POLYPEPTIDE 28" (CYP71B28)	13.8445	4.84763	10.1707	9.62092
AT1G13110	"CYTOCHROME P450, FAMILY 71 SUBFAMILY B, POLYPEPTIDE 7" (CYP71B7)	0.869799	0.533952	2.68003	1.36126
AT1G13120	nucleoporin GLE1-like protein	7.10728	8.01315	6.84432	7.32158
AT1G13140	"CYTOCHROME P450, FAMILY 86, SUBFAMILY C, POLYPEPTIDE 3" (CYP86C3)	0.995191	1.93542	0.864644	1.26508
AT1G13145		7.10479	8.25364	5.2245	6.86098
AT1G13150	"CYTOCHROME P450, FAMILY 86, SUBFAMILY C, POLYPEPTIDE 4" (CYP86C4)	1.84422	2.78461	0.982456	1.87043
AT1G13160	ARM repeat superfamily protein	14.2839	14.3004	18.5893	15.7245
AT1G13170	OSBP(OXYSTEROL BINDING PROTEIN)-RELATED PROTEIN 1D (ORP1D)	11.2408	11.7498	10.0126	11.0011
AT1G13180	DISTORTED TRICHOMES 1 (DIS1)	7.18162	6.1864	7.4049	6.9243
AT1G13190	RNA-binding (RRM/RBD/RNP motifs) family protein	32.1482	30.5182	31.2302	31.2989
AT1G13195	RING/U-box superfamily protein	9.03008	7.10236	9.47777	8.53674
AT1G13210	AUTOINHIBITED CA2+/ATPASE II (ACA.l)	10.9013	12.9274	13.4614	12.43
AT1G13220	LITTLE NUCLEI2 (LINC2)	16.2755	15.1297	16.203	15.8694
AT1G13245	ROTUNDIFOLIA LIKE 17 (RTFL17)	12.1114	8.9485	12.1205	11.0601
AT1G13250	GALACTURONOSYLTRANSFERASE-LIKE 3 (GATL3)	3.54843	6.41223	0.931663	3.63078
AT1G13260	RELATED TO ABI3/VP1 1 (RAV1)	22.0857	17.1803	12.2177	17.1612
AT1G13270	METHIONINE AMINOPEPTIDASE 1B (MAP1C)	5.00806	4.6449	5.43871	5.03056
AT1G13280	ALLENE OXIDE CYCLASE 4 (AOC4)	58.5609	104.637	46.5618	69.9199
AT1G13300	HYPERSENSITIVITY TO LOW PI-ELICITED PRIMARY ROOT SHORTENING 1 (HRS1)	3.55386	2.61458	1.05233	2.40692
AT1G13320	PROTEIN PHOSPHATASE 2A SUBUNIT A3 (PP2AA3)	13.1104	15.0696	15.1352	14.4384
AT1G13330	ARABIDOPSIS HOP2 HOMOLOG (AHP2)	3.27396	2.05454	2.61138	2.64663
AT1G13340	Regulator of Vps4 activity in the MVB pathway protein	17.8093	11.4181	20.8769	16.7014
AT1G13350	Protein kinase superfamily protein	6.26811	5.66964	6.78687	6.24154
AT1G13360	hypothetical protein	35.2761	44.0734	58.8319	46.0604
AT1G13380	sodium/hydrogen exchanger (DUF1218)	28.6141	35.8168	28.9409	31.124
AT1G13390	translocase subunit seca	27.0018	25.0609	36.1162	29.393
AT1G13410	Tetratricopeptide repeat (TPR)-like superfamily protein	1.45521	1.6672	1.44725	1.52322
AT1G13440	GLYCERALDEHYDE-3-PHOSPHATE DEHYDROGENASE C2 (GAPC2)	721.128	682.902	627.544	677.191
AT1G13450	GT-1 (GT-1)	9.75817	10.3278	10.1435	10.0765
AT1G13460	TRUE	6.2106	7.59253	5.90763	6.57025
AT1G13480	hypothetical protein (DUF1262)	6.29313	3.43437	6.58226	5.43659
AT1G13520	hypothetical protein (DUF1262)	11.2227	3.51177	19.4563	11.3969
AT1G13560	AMINOALCOHOLPHOSPHOTRANSFERASE 1 (AAPT1)	7.29453	9.59457	6.14601	7.67837
AT1G13570	F-box/RNI-like superfamily protein	14.3914	17.6099	13.0549	15.0187
AT1G13580	LAG1 LONGEVITY ASSURANCE HOMOLOG 3 (LAG13)	3.57158	3.61024	4.73567	3.9725
AT1G13590	PHYTOSULFOKINE 1 PRECURSOR (PSK1)	2.96984	1.37826	10.8898	5.0793
AT1G13620	ROOT MERISTEM GROWTH FACTOR 2 (RGF2)	5.18215	1.32976	5.73273	4.08155
AT1G13630	Tetratricopeptide repeat (TPR)-like superfamily protein	1.27619	1.4012	1.26371	1.3137
AT1G13640	Phosphatidylinositol 3- and 4-kinase family protein	25.1338	27.8351	18.3043	23.7577
AT1G13690	ATPASE E1 (ATE1)	13.086	13.6205	11.8567	12.8544
AT1G13700	6-PHOSPHOGLUCONOLACTONASE 1 (PGL1)	5.28839	2.82919	4.58049	4.23269
AT1G13730	Nuclear transport factor 2 (NTF2) family protein with RNA binding (RRM-RBD-RNP motifs) domain-containing protein	9.78247	12.0481	11.2038	11.0114
AT1G13740	ABI FIVE BINDING PROTEIN 2 (AFP2)	3.14262	4.54849	4.85657	4.18256
AT1G13750	Purple acid phosphatases superfamily protein	2.00995	4.1763	1.44579	2.54402
AT1G13770	ROOT UV-B SENSITIVE 3 (RUS3)	5.26063	5.36139	4.48578	5.03593
AT1G13780	F-box/RNI-like/FBD-like domains-containing protein	3.51336	2.43781	3.47264	3.14127
AT1G13790	FACTOR OF DNA METHYLATION 4 (FDM4)	1.58415	0.571138	0.959881	1.03839
AT1G13800	EMBRYONIC FACTOR 19 (FAC19)	1.33865	1.94209	1.28092	1.52055
AT1G13810	Restriction endonuclease%2C type II-like superfamily protein	8.54553	9.17469	8.24769	8.65597
AT1G13820	alpha/beta-Hydrolases superfamily protein	1.74383	2.06624	1.44781	1.75263
AT1G13860	QUASIMODO2 LIKE 1 (QUL1)	7.0308	5.49116	5.99758	6.17318
AT1G13870	DEFORMED ROOTS AND LEAVES 1 (DRL1)	8.76777	9.96325	8.31071	9.01391
AT1G13880	ELM2	12.624	15.3022	11.2746	13.0669
AT1G13900	PURPLE ACID PHOSPHATASE 2 (PAP2)	13.0861	10.5715	13.0432	12.2336
AT1G13910	Leucine-rich repeat (LRR) family protein	2.95761	2.97322	3.26124	3.06403
AT1G13930	oleosin-B3-like protein	21.5301	20.5488	18.129	20.0693
AT1G13940	T-box transcription factor%2C putative (DUF863)	5.34992	7.3586	4.76993	5.82615
AT1G13950	EUKARYOTIC ELONGATION FACTOR 5A-1 (ELF5A-1)	3.62974	6.34255	2.14119	4.03782
AT1G13960	WRKY DNA-BINDING PROTEIN 4 (WRKY4)	19.9362	19.8675	20.616	20.1399
AT1G13970	beta-hexosaminidase (DUF1336)	3.66203	3.45161	4.76876	3.9608
AT1G13980	GNOM (GN)	19.4289	22.0251	19.3136	20.2558
AT1G13990	plant/protein	33.6365	32.6435	41.2789	35.853
AT1G14000	VH1-INTERACTING KINASE (VIK)	18.8984	17.3553	22.8301	19.6946
AT1G14010	emp24/gp25L/p24 family/GOLD family protein	18.8133	14.7346	19.531	17.693
AT1G14020	O-fucosyltransferase family protein	4.42243	4.78135	4.20458	4.46945
AT1G14030	LYSINE METHYLTRANSFERASE (LSMT)-LIKE (LSMT-L)	1.75683	2.05039	0.836826	1.54801
AT1G14040	EXS (ERD1/XPR1/SYG1) family protein	3.68837	3.14236	4.3481	3.72628
AT1G14060	GCK domain-containing protein	43.6117	46.5966	55.9676	48.7253
AT1G14070	FUCOSYLTRANSFERASE 7 (FUT7)	4.99436	5.41893	3.3881	4.60046
AT1G14080	FUCOSYLTRANSFERASE 6 (FUT6)	1.47875	1.36064	0.226374	1.02192
AT1G14090		4.05114	5.06169	4.10347	4.40543
AT1G14120	2-oxoglutarate (2OG) and Fe(II)-dependent oxygenase superfamily protein	3.34567	5.78986	1.87627	3.6706
AT1G14130	ATDAO; DAO1; DIOXYGENASE FOR AUXIN OXIDATION 1	22.1727	34.4199	35.6644	30.7523
AT1G14140	UNCOUPLING PROTEIN 3 (UCP3)	5.89683	7.1333	5.69604	6.24206
AT1G14170	RNA-binding KH domain-containing protein	20.9919	12.0278	24.7146	19.2448
AT1G14180	RING/U-box superfamily protein	2.87047	3.86239	2.07788	2.93691
AT1G14200	RING/U-box superfamily protein	12.7497	9.52198	28.7318	17.0012
AT1G14210	Ribonuclease T2 family protein	45.8836	40.2818	34.462	40.2091
AT1G14230	GDA1/CD39 nucleoside phosphatase family protein	14.0104	13.5756	15.2793	14.2884
AT1G14240	GDA1/CD39 nucleoside phosphatase family protein	5.00031	3.97144	1.16912	3.38029
AT1G14260	RING/FYVE/PHD zinc finger superfamily protein	3.18246	3.20675	5.95766	4.11562
AT1G14290	SPHINGOID BASE HYDROXYLASE 2 (SBH2)	16.6856	25.9373	15.1444	19.2558
AT1G14300	ARM repeat superfamily protein	10.5217	12.4854	11.5599	11.5223
AT1G14310	Haloacid dehalogenase-like hydrolase (HAD) superfamily protein	2.98867	3.28573	3.06863	3.11434
AT1G14320	SUPPRESSOR OF ACAULIS 52 (SAC52)	419.92	424.4	582.438	475.586
AT1G14330	Galactose oxidase/kelch repeat superfamily protein	24.9811	18.9551	26.2035	23.3799
AT1G14340	RNA-binding (RRM/RBD/RNP motifs) family protein	15.9384	7.82041	20.2532	14.6707
AT1G14345	NAD(P)-linked oxidoreductase superfamily protein	2.15204	2.41204	1.55909	2.04106
AT1G14350	FOUR LIPS (FLP)	12.6338	17.483	13.5327	14.5498
AT1G14360	UDP-GALACTOSE TRANSPORTER 3 (UTR3)	13.1414	9.91128	15.4436	12.8321
AT1G14370	PROTEIN KINASE 2A (APK2A)	15.0255	9.72374	16.5	13.7498
AT1G14380	IQ-DOMAIN 28 (IQD28)	9.97855	12.0441	8.84084	10.2878
AT1G14390	Leucine-rich repeat protein kinase family protein	6.91017	5.33648	6.18802	6.14489
AT1G14400	UBIQUITIN CARRIER PROTEIN 1 (UBC1)	58.942	64.2614	53.0327	58.7454
AT1G14410	WHIRLY 1 (WHY1)	6.37829	7.70447	6.11837	6.73371
AT1G14450	NADH dehydrogenase (ubiquinone)s	24.3168	20.2503	29.786	24.7844
AT1G14460	AAA-type ATPase family protein	3.35178	4.37325	3.82008	3.84837
AT1G14470	Pentatricopeptide repeat (PPR) superfamily protein	1.41323	1.5346	0.965053	1.3043
AT1G14480	Ankyrin repeat family protein	4.48931	5.38777	2.65682	4.17797
AT1G14490	AHL28; AT-HOOK MOTIF NUCLEAR LOCALIZED PROTEIN 28	1.15148	0.870965	1.07719	1.03321
AT1G14510	ALFIN-LIKE 7 (AL7)	30.5919	34.6061	32.8117	32.6699
AT1G14530	TOM THREE HOMOLOG 1 (THH1)	2.19981	2.32036	2.07738	2.19919
AT1G14540	PEROXIDASE 4 (PER4)	1.51531	0.0938037	1.9485	1.18587
AT1G14560	Mitochondrial substrate carrier family protein	7.29632	7.60778	7.73016	7.54475
AT1G14570	ATPUX7; PLANT UBX DOMAIN-CONTAINING PROTEIN 7; PUX7	21.5965	19.6573	25.42	22.2246
AT1G14590	Nucleotide-diphospho-sugar transferase family protein	2.7013	3.07825	2.48146	2.75367
AT1G14600	Homeodomain-like superfamily protein	2.29665	0.964159	4.80089	2.68723
AT1G14610	TWIN 2 (TWN2)	33.6969	38.5632	44.8867	39.0489
AT1G14620	DECOY (DECOY)	17.465	23.128	18.4302	19.6744
AT1G14630	XRI1-like protein	22.1218	19.4827	9.66308	17.0892
AT1G14640	SWAP (Suppressor-of-White-APricot)/surp domain-containing protein	10.3536	4.00403	5.55406	6.63724
AT1G14642	hypothetical protein	6.77824	3.18569	3.75673	4.57355
AT1G14650	SWAP (Suppressor-of-White-APricot)/surp domain-containing protein / ubiquitin family protein	39.1785	38.2007	35.7752	37.7181
AT1G14670	Endomembrane protein 70 protein family	54.0353	56.5644	60.5288	57.0428
AT1G14680	early endosome antigen	6.22532	4.91348	5.28921	5.476
AT1G14685	BASIC PENTACYSTEINE 2 (BPC2)	20.6028	22.8979	19.7946	21.0984
AT1G14687	HOMEOBOX PROTEIN 32 (HB32)	4.49104	2.94202	2.63684	3.35663
AT1G14690	MICROTUBULE-ASSOCIATED PROTEIN 65-7 (MAP65-7)	17.9721	20.15	15.5253	17.8825
AT1G14710	hydroxyproline-rich glycoprotein family protein	45.623	33.988	42.2053	40.6054
AT1G14720	XYLOGLUCAN ENDOTRANSGLUCOSYLASE/HYDROLASE 28 (XTH28)	29.3642	8.79631	21.4849	19.8818
AT1G14740	TITANIA 1 (TTA1)	70.9794	81.7664	64.3366	72.3608
AT1G14770	RING/FYVE/PHD zinc finger superfamily protein	5.18335	6.59695	3.67261	5.15097
AT1G14780	MAC/Perforin domain-containing protein	6.54029	2.18246	10.6883	6.47036
AT1G14790	RNA-DEPENDENT RNA POLYMERASE 1 (RDR1)	5.03006	7.23791	3.05219	5.10672
AT1G14810	semialdehyde dehydrogenase family protein	22.9301	22.0872	27.2083	24.0752
AT1G14820	Sec14p-like phosphatidylinositol transfer family protein	14.9025	14.8492	8.9462	12.8993
AT1G14830	DYNAMIN-LIKE 1C (DL1C)	20.4222	19.6395	24.4526	21.5048
AT1G14840	MICROTUBULE-ASSOCIATED PROTEINS 70-4 (MAP70-4)	2.06173	2.9421	1.99796	2.33393
AT1G14850	NUCLEOPORIN 155 (NUP155)	15.1703	18.5997	15.9346	16.5682
AT1G14860	NUDIX HYDROLASE HOMOLOG 18 (NUDT18)	2.3002	4.62323	5.7273	4.21691
AT1G14870	PLANT CADMIUM RESISTANCE 2 (PCR2)	106.945	62.1132	167.758	112.272
AT1G14890	Plant invertase/pectin methylesterase inhibitor superfamily protein	157.067	159.656	249.741	188.821
AT1G14900	HIGH MOBILITY GROUP A (HMGA)	42.14	63.4842	30.9654	45.5299
AT1G14910	ENTH/ANTH/VHS superfamily protein	14.7343	13.9599	13.2489	13.981
AT1G14920	GIBBERELLIC ACID INSENSITIVE (GAI)	6.34744	7.16366	4.05106	5.85405
AT1G14970	O-fucosyltransferase family protein	3.52811	4.31354	3.6243	3.82198
AT1G14980	CHAPERONIN 10 (CPN10)	70.708	74.4106	80.0006	75.0397
AT1G14990	transmembrane protein	5.76563	5.29508	5.35731	5.47267
AT1G15000	SERINE CARBOXYPEPTIDASE-LIKE 50 (scpl50)	4.15142	9.89774	6.01527	6.68814
AT1G15010	mediator of RNA polymerase II transcription subunit	4.27925	0.803142	5.35098	3.47779
AT1G15020	QUIESCIN-SULFHYDRYL OXIDASE 1 (QSOX1)	7.34212	7.8004	6.90198	7.34817
AT1G15030	hypothetical protein (DUF789)	6.92513	7.15969	6.80195	6.96226
AT1G15040	GLUTAMINE AMIDOTRANSFERASE 1_2.1 (GAT1_2.1)	4.18939	2.89485	10.3128	5.799
AT1G15060	alpha/beta hydrolase family protein	5.31803	6.59165	6.43215	6.11394
AT1G15080	LIPID PHOSPHATE PHOSPHATASE 2 (LPP2)	1.64784	1.31373	0.506546	1.15604
AT1G15100	RING-H2 FINGER A2A (RHA2A)	43.4151	43.5938	48.2387	45.0825
AT1G15110	PHOSPHATIDYLSERINE SYNTHASE 1 (PSS1)	8.45662	11.3872	10.7568	10.2002
AT1G15120	Ubiquinol-cytochrome C reductase hinge protein	40.7759	44.8504	51.0769	45.5677
AT1G15125	S-adenosyl-L-methionine-dependent methyltransferases superfamily protein	1.27038	4.34495	0.80544	2.14026
AT1G15130	Endosomal targeting BRO1-like domain-containing protein	31.3912	27.1193	34.8203	31.1103
AT1G15140	FAD/NAD(P)-binding oxidoreductase	6.17357	5.97337	7.87467	6.67387
AT1G15160	MATE efflux family protein	1.45318	2.44981	1.3849	1.76263
AT1G15165	RING/FYVE/PHD zinc finger superfamily protein	0.908894	1.57917	0.6285	1.03885
AT1G15170	MATE efflux family protein	22.8002	20.9364	23.1662	22.3009
AT1G15180	MATE efflux family protein	1.32985	1.17397	1.31631	1.27338
AT1G15190	Fasciclin-like arabinogalactan family protein	2.74403	4.65243	3.67912	3.69186
AT1G15200	protein-protein interaction regulator family protein	37.7262	41.5349	37.6579	38.973
AT1G15210	ATP-BINDING CASSETTE G35 (ABCG35)	14.8722	21.0023	12.1752	16.0166
AT1G15215	SAWADEE HOMEODOMAIN HOMOLOG 1 (SHH1)	6.08051	5.80313	6.69512	6.19292
AT1G15220	(CCMH)	3.09215	4.63395	3.03825	3.58812
AT1G15230	hypothetical protein	44.2396	40.481	39.0435	41.2547
AT1G15240	phox (PX) domain-containing protein	10.3045	10.4564	11.0013	10.5874
AT1G15250	Zinc-binding ribosomal protein family protein	18.1762	22.7678	17.0807	19.3416
AT1G15270	Translation machinery associated TMA7	82.2573	64.9235	90.2507	79.1439
AT1G15280	CASC3/Barentsz eIF4AIII binding protein	17.2884	18.4084	17.3078	17.6682
AT1G15310	SIGNAL RECOGNITION PARTICLE 54 KDA SUBUNIT (ATHSRP54A)	10.0536	6.01828	10.0904	8.72074
AT1G15330	Cystathionine beta-synthase (CBS) protein	2.25475	1.35765	0.275101	1.29583
AT1G15340	METHYL-CPG-BINDING DOMAIN 10 (MBD10)	53.771	65.8664	41.3192	53.6522
AT1G15350	DUF4050 family protein	19.7381	14.9848	19.3858	18.0362
AT1G15370	SNARE-like superfamily protein	13.6743	13.6572	13.459	13.5968
AT1G15380	GLYOXYLASE I 4 (GLYI4)	34.9043	9.932	43.3176	29.3846
AT1G15385	cotton fiber protein	41.3647	10.4003	27.2015	26.3222
AT1G15390	PEPTIDE DEFORMYLASE 1A (PDF1A)	8.57319	12.218	8.14348	9.64489
AT1G15400	hypothetical protein	24.0031	25.7696	30.5697	26.7808
AT1G15405		32.7711	35.3296	27.8648	31.9885
AT1G15410	aspartate-glutamate racemase family	4.23583	4.95949	2.87465	4.02333
AT1G15420	LANT-SPECIFIC COMPONENT OF THE PRE- RRNA PROCESSING COMPLEX1; PCP1	30.1884	33.3689	35.2598	32.939
AT1G15430	hypothetical protein (DUF1644)	22.1295	15.0843	25.4986	20.9041
AT1G15440	PERIODIC TRYPTOPHAN PROTEIN 2 (PWP2)	18.0735	21.6061	22.3849	20.6882
AT1G15470	Transducin/WD40 repeat-like superfamily protein	4.79129	4.79432	6.80057	5.46206
AT1G15480	Tetratricopeptide repeat (TPR)-like superfamily protein	9.25526	11.0786	8.12393	9.48594
AT1G15490	alpha/beta-Hydrolases superfamily protein	4.79559	6.53682	4.4948	5.27574
AT1G15500	(ATNTT2)	58.8559	63.841	54.4376	59.0448
AT1G15510	EARLY CHLOROPLAST BIOGENESIS2 (ECB2)	1.45476	1.66098	2.00207	1.70594
AT1G15520	ATP-BINDING CASSETTE G40 (ABCG40)	1.31211	0.361248	3.96512	1.8795
AT1G15530	Concanavalin A-like lectin protein kinase family protein	6.24847	5.60843	5.81033	5.88907
AT1G15570	CYCLIN A2;3 (CYCA2;3)	3.16035	6.28263	2.86651	4.10316
AT1G15580	INDOLE-3-ACETIC ACID INDUCIBLE 5 (IAA5)	35.8308	41.989	85.3944	54.4047
AT1G15610	transmembrane protein	4.93978	7.12188	1.08326	4.38164
AT1G15630	transmembrane protein	11.1315	19.5324	1.96001	10.8746
AT1G15640	transmembrane protein	10.2639	20.0701	2.02764	10.7872
AT1G15660	CENTROMERE PROTEIN C (CENP-C)	8.13978	11.3662	7.80787	9.10461
AT1G15670	Galactose oxidase/kelch repeat superfamily protein	55.7227	75.9031	55.1819	62.2692
AT1G15690	(AVP1)	147.893	152.106	180.067	160.022
AT1G15700	(ATPC2)	4.9672	6.13747	3.28715	4.79727
AT1G15710	prephenate dehydrogenase family protein	10.5861	11.4412	10.0712	10.6995
AT1G15720	TRF-LIKE 5 (TRFL5)	3.83722	4.47983	3.2279	3.84831
AT1G15730	Cobalamin biosynthesis CobW-like protein	1.37793	1.66997	0.746975	1.26496
AT1G15740	Leucine-rich repeat family protein	22.8281	14.4969	17.6339	18.3196
AT1G15750	TOPLESS (TPL)	55.7846	61.2257	54.4245	57.1449
AT1G15780	MED15_1; MEDIATOR 15_1; NON-RECOGNITION-OF-BTH 4; NRB4	17.679	14.9722	22.4538	18.3683
AT1G15790	mediator of RNA polymerase II transcription subunit 15a-like protein	5.39792	5.19463	6.79522	5.79592
AT1G15800	hypothetical protein	5.72478	5.74695	6.20476	5.89216
AT1G15810	S15/NS1%2C RNA-binding protein	11.6358	14.1141	11.7197	12.4899
AT1G15820	LIGHT HARVESTING COMPLEX PHOTOSYSTEM II SUBUNIT 6 (LHCB6)	19.9286	2.71637	4.04498	8.89664
AT1G15860	defective in cullin neddylation protein (DUF298)	14.9684	9.76187	17.9782	14.2362
AT1G15870	Mitochondrial glycoprotein family protein	2.59409	2.39868	2.94692	2.64657
AT1G15880	GOLGI SNARE 11 (GOS11)	16.867	17.887	13.297	16.017
AT1G15910	FACTOR OF DNA METHYLATION 1 (FDM1)	13.5108	17.8408	7.54614	12.9659
AT1G15920	Polynucleotidyl transferase%2C ribonuclease H-like superfamily protein	18.8985	20.8572	20.8033	20.1863
AT1G15930	Ribosomal protein L7Ae/L30e/S12e/Gadd45 family protein	116.966	141.235	132.023	130.075
AT1G15940	ATPDS5E; PDS5E	19.3672	20.9741	19.3362	19.8925
AT1G15950	CINNAMOYL COA REDUCTASE 1 (CCR1)	38.1072	38.9408	48.2149	41.7543
AT1G15970	DNA glycosylase superfamily protein	5.15053	6.39697	4.09219	5.21323
AT1G16000	GAG1At protein	15.8107	17.029	14.4135	15.7511
AT1G16010	MAGNESIUM TRANSPORTER 2 (MGT2)	19.1768	15.7276	20.0817	18.3287
AT1G16020	CALCIUM CAFFEINE ZINC SENSITIVITY 1A; CCZ1A	3.19266	3.01809	2.15259	2.78778
AT1G16030	HEAT SHOCK PROTEIN 70B (Hsp70b)	20.867	3.89309	18.8135	14.5245
AT1G16040	phosphatidylinositol-glycan biosynthesis class F-like protein	8.46832	7.28995	8.47464	8.07764
AT1G16060	ARIA-INTERACTING DOUBLE AP2 DOMAIN PROTEIN (ADAP)	2.11744	2.01405	0.661455	1.59765
AT1G16070	TUBBY LIKE PROTEIN 8 (TLP8)	2.23039	4.46648	2.04016	2.91234
AT1G16080	nuclear protein	9.01668	9.74942	6.02749	8.26453
AT1G16090	WALL ASSOCIATED KINASE-LIKE 7 (WAKL7)	1.66271	2.63449	1.14452	1.81391
AT1G16110	WALL ASSOCIATED KINASE-LIKE 6 (WAKL6)	2.69685	1.99581	1.55043	2.08103
AT1G16170	ephrin-A3 protein	4.7179	3.83655	4.10558	4.22001
AT1G16180	Serinc-domain containing serine and sphingolipid biosynthesis protein	91.7336	78.499	83.6655	84.6327
AT1G16190	RADIATION SENSITIVE23A (RAD23A)	11.2243	11.2444	14.2362	12.2349
AT1G16210	coiled-coil protein	43.5104	37.3841	53.3585	44.751
AT1G16220	Protein phosphatase 2C family protein	5.44875	8.14416	5.20035	6.26442
AT1G16240	SYNTAXIN OF PLANTS 51 (SYP51)	31.6391	31.8799	26.2719	29.9303
AT1G16250	Galactose oxidase/kelch repeat superfamily protein	6.90658	7.0375	6.45909	6.80106
AT1G16260	Wall-associated kinase family protein	3.04867	4.12411	3.02512	3.3993
AT1G16270	kinase superfamily with octicosapeptide/Phox/Bem1p domain-containing protein	13.7548	14.8825	15.7585	14.7986
AT1G16280	RNA HELICASE 36 (RH36)	8.33159	7.26568	7.13872	7.57866
AT1G16300	GLYCERALDEHYDE-3-PHOSPHATE DEHYDROGENASE OF PLASTID 2 (GAPCP-2)	8.42698	8.78472	9.79305	9.00158
AT1G16310	Cation efflux family protein	1.62685	1.86151	3.17299	2.22045
AT1G16320	plant/protein (DUF2358)	9.2258	7.03717	7.4327	7.89856
AT1G16330	CYCLIN B3;1 (CYCB3;1)	1.15883	1.69257	0.678721	1.17671
AT1G16340	(ATKDSA2)	4.84932	5.23797	3.52212	4.53647
AT1G16350	Aldolase-type TIM barrel family protein	38.5583	52.4165	44.0547	45.0099
AT1G16370	ORGANIC CATION/CARNITINE TRANSPORTER 6 (OCT6)	0.991174	3.16429	0.8002	1.65189
AT1G16430	Surfeit locus protein 5 subunit 22 of Mediator complex	3.60322	3.92979	3.89951	3.81084
AT1G16460	RHODANESE HOMOLOGUE 2 (RDH2)	11.6373	10.9846	7.31284	9.97823
AT1G16470	PROTEASOME SUBUNIT PAB1 (PAB1)	18.6426	17.5047	21.6153	19.2542
AT1G16480	Tetratricopeptide repeat (TPR)-like superfamily protein	1.88668	1.82435	1.49225	1.73442
AT1G16500	filamentous hemagglutinin transporter	3.94019	4.03882	2.10182	3.36027
AT1G16510	SAUR41; SMALL AUXIN UPREGULATED 41	7.87434	11.9716	12.3168	10.7209
AT1G16520	interactor of constitutive active ROPs protein	17.3699	19.7735	12.8992	16.6809
AT1G16530	ASYMMETRIC LEAVES 2-LIKE 9 (ASL9)	8.46265	5.33129	12.6159	8.80328
AT1G16540	ABA DEFICIENT 3 (ABA3)	6.13668	5.34475	8.50391	6.66178
AT1G16550		3.00689	5.06028	3.05605	3.70774
AT1G16560	Per1-like family protein	19.8562	22.4434	23.0185	21.7727
AT1G16570	UDP-Glycosyltransferase superfamily protein	4.71038	5.53662	4.19069	4.81256
AT1G16590	(REV7)	1.9013	2.16185	0.988919	1.68402
AT1G16610	ARGININE/SERINE-RICH 45 (SR45)	18.8541	19.4916	20.1364	19.494
AT1G16630	transmembrane protein	2.89532	5.84228	2.30781	3.6818
AT1G16640	AP2/B3-like transcriptional factor family protein	2.41521	1.39516	1.49864	1.76967
AT1G16650	S-adenosyl-L-methionine-dependent methyltransferases superfamily protein	3.84978	3.17782	4.90415	3.97725
AT1G16670	COLD-RESPONSIVE PROTEIN KINASE 1; CRPK1	11.0138	9.44716	11.7341	10.7317
AT1G16680	Chaperone DnaJ-domain superfamily protein	8.09056	9.93907	6.77604	8.26856
AT1G16690	Enhancer of polycomb-like transcription factor protein	2.02442	2.21668	1.54058	1.92722
AT1G16700	Alpha-helical ferredoxin	10.3567	11.8873	10.8057	11.0166
AT1G16710	HISTONE ACETYLTRANSFERASE OF THE CBP FAMILY 12 (HAC12)	9.01169	9.59711	9.06104	9.22328
AT1G16720	HIGH CHLOROPHYLL FLUORESCENCE PHENOTYPE 173 (HCF173)	5.20872	4.53389	5.1888	4.97714
AT1G16740	Ribosomal protein L20	17.3086	18.7124	19.4054	18.4755
AT1G16780	(VHP2;2)	1.51562	1.32916	1.96131	1.60203
AT1G16790	ribosomal protein-like protein	12.6748	9.43058	12.663	11.5895
AT1G16800	P-loop containing nucleoside triphosphate hydrolases superfamily protein	3.91444	3.66328	4.00311	3.86028
AT1G16810	7-dehydrocholesterol reductase-like protein	37.4953	36.7082	34.1977	36.1337
AT1G16820	vacuolar ATP synthase catalytic subunit-related / V-ATPase-related / vacuolar proton pump-like protein	1.69397	1.36766	1.34777	1.4698
AT1G16825	Reticulon family protein	1.51682	1.78295	1.32151	1.54043
AT1G16830	Pentatricopeptide repeat (PPR) superfamily protein	2.32422	3.2446	2.35554	2.64146
AT1G16840	hypothetical protein	44.1776	39.0822	42.304	41.8546
AT1G16850	transmembrane protein	14.7996	14.1554	18.0785	15.6778
AT1G16870	mitochondrial 28S ribosomal protein S29-like protein	12.8296	13.6418	14.1582	13.5432
AT1G16880	ACT DOMAIN REPEATS 11 (ACR11)	3.89297	3.79692	3.12194	3.60395
AT1G16890	UBIQUITIN-CONJUGATING ENZYME 36 (UBC36)	45.1132	42.0532	43.5117	43.5594
AT1G16900	EMS-MUTAGENIZED BRI1 SUPPRESSOR 3 (EBS3)	11.7243	10.113	10.9007	10.9127
AT1G16916	transmembrane protein	8.71809	10.1477	7.39349	8.75309
AT1G16920	RAB GTPASE HOMOLOG A1B (RABA1b)	18.9998	20.4272	14.2813	17.9028
AT1G16970	KU70 HOMOLOG (KU70)	4.07252	4.38964	4.81757	4.42658
AT1G17020	SENESCENCE-RELATED GENE 1 (SRG1)	30.3339	12.2281	43.4053	28.6558
AT1G17030	hypothetical protein	1.25943	1.21493	1.12033	1.19823
AT1G17040	SH2 DOMAIN PROTEIN A (SHA)	1.60505	2.27937	1.62202	1.83548
AT1G17050	SOLANESYL DIPHOSPHATE SYNTHASE 2 (SPS2)	12.1638	16.1418	8.17605	12.1605
AT1G17060	CYTOCHROME P450 72C1 (CYP72C1)	19.9184	24.0591	27.4002	23.7926
AT1G17070	GC-rich sequence DNA-binding factor-like protein with Tuftelin interacting domain-containing protein	9.64019	10.6606	9.58852	9.96312
AT1G17080	Ribosomal protein L18ae family	31.9922	25.4402	30.6944	29.3756
AT1G17090	transmembrane protein	2.1709	1.30229	1.96915	1.81411
AT1G17100	SOUL heme-binding family protein	2.59295	1.83994	3.28019	2.57103
AT1G17110	UBIQUITIN-SPECIFIC PROTEASE 15 (UBP15)	13.3437	13.4333	12.521	13.0993
AT1G17120	CATIONIC AMINO ACID TRANSPORTER 8 (CAT8)	15.7035	18.5829	9.26174	14.516
AT1G17130	coiled-coil protein (DUF572)	15.3714	12.5648	18.1955	15.3772
AT1G17140	INTERACTOR OF CONSTITUTIVE ACTIVE ROPS 1 (ICR1)	5.74627	11.1072	3.29081	6.71476
AT1G17145	RING/U-box superfamily protein	7.91438	8.3468	9.14724	8.46947
AT1G17160	RBSK; RIBOKINASE	9.3748	8.55325	7.5955	8.50785
AT1G17170	GLUTATHIONE S-TRANSFERASE TAU 24 (GSTU24)	51.1696	46.5868	113.727	70.4946
AT1G17180	GLUTATHIONE S-TRANSFERASE TAU 25 (GSTU25)	14.1752	5.8919	25.9989	15.3553
AT1G17190	GLUTATHIONE S-TRANSFERASE TAU 26 (GSTU26)	5.80223	16.4414	9.86451	10.7027
AT1G17200	CASP-LIKE PROTEIN 2A1; CASPL2A1	3.05178	4.26963	0.619406	2.64694
AT1G17210	IAP-LIKE PROTEIN 1 (ILP1)	36.3609	42.8504	35.7193	38.3102
AT1G17220	FU-GAERI1 (FUG1)	5.11112	3.15878	2.66536	3.64509
AT1G17230	Leucine-rich receptor-like protein kinase family protein	1.05521	0.721188	1.80534	1.19391
AT1G17270	O-fucosyltransferase family protein	2.03755	2.5907	1.65559	2.09461
AT1G17280	UBIQUITIN-CONJUGATING ENZYME 34 (UBC34)	9.8803	10.8705	10.4519	10.4009
AT1G17290	ALANINE AMINOTRANSFERAS (AlaAT1)	142.855	114.14	175.428	144.141
AT1G17310	MADS-box transcription factor family protein	5.20488	2.13925	6.12727	4.49047
AT1G17330	Metal-dependent phosphohydrolase	6.00938	7.14755	8.07094	7.07596
AT1G17340	SAC5; SUPPRESSOR OF ACTIN 5	1.67238	1.93595	2.70275	2.10369
AT1G17350	NADH:ubiquinone oxidoreductase intermediate-associated protein 30	3.47791	4.76148	3.59768	3.94569
AT1G17360	LOW protein: protein phosphatase 1 regulatory subunit-like protein	7.41637	8.70891	7.35483	7.8267
AT1G17370	OLIGOURIDYLATE BINDING PROTEIN 1B (UBP1B)	23.4519	28.7611	20.609	24.274
AT1G17380	JASMONATE-ZIM-DOMAIN PROTEIN 5 (JAZ5)	4.54797	4.32266	7.46437	5.445
AT1G17410	Nucleoside diphosphate kinase family protein	3.74728	4.72169	2.74093	3.73664
AT1G17420	LIPOXYGENASE 3 (LOX3)	4.32898	1.03503	4.89291	3.41897
AT1G17440	ENHANCED ETHYLENE RESPONSE 4 (EER4)	15.2474	16.2522	13.3361	14.9452
AT1G17450	B-block binding subunit of TFIIIC	3.31486	3.07091	2.68794	3.02457
AT1G17455	ELF4-LIKE 4 (ELF4-L4)	4.15962	5.65864	3.67274	4.497
AT1G17460	TRF-LIKE 3 (TRFL3)	3.94525	4.45122	3.39803	3.9315
AT1G17470	DEVELOPMENTALLY REGULATED G-PROTEIN 1 (DRG1)	15.107	18.6614	15.6315	16.4666
AT1G17480	IQ-DOMAIN 7 (IQD7)	5.15293	5.908	3.64927	4.9034
AT1G17490	epidermal patterning factor-like protein	15.0133	16.3538	16.2095	15.8589
AT1G17500	ATPase E1-E2 type family protein / haloacid dehalogenase-like hydrolase family protein	19.6782	20.2261	23.2894	21.0646
AT1G17510	hypothetical protein	15.9507	13.3334	17.7419	15.6753
AT1G17520	Homeodomain-like/winged-helix DNA-binding family protein	8.5319	7.95557	7.75928	8.08225
AT1G17530	TRANSLOCASE OF INNER MITOCHONDRIAL MEMBRANE 23 (TIM23-1)	69.4114	72.1861	75.235	72.2775
AT1G17550	HOMOLOGY TO ABI2 (HAB2)	20.6967	21.5599	20.4525	20.903
AT1G17560	HUELLENLOS (HLL)	8.11898	9.7951	7.16663	8.36023
AT1G17580	MYOSIN 1 (MYA1)	8.28636	7.56277	8.02623	7.95845
AT1G17590	"NUCLEAR FACTOR Y, SUBUNIT A8" (NF-YA8)	7.29539	11.637	6.43176	8.45472
AT1G17620	Late embryogenesis abundant (LEA) hydroxyproline-rich glycoprotein family	46.7881	32.1205	58.2449	45.7179
AT1G17630	CELL WALL MAINTAINER 1; CWM1	2.069	1.65926	2.18604	1.97143
AT1G17650	GLYOXYLATE REDUCTASE 2 (GLYR2)	1.81465	2.37043	1.05075	1.74528
AT1G17665	CA-responsive protein	2.99126	2.94125	3.33554	3.08935
AT1G17680	tetratricopeptide repeat (TPR)-containing protein	5.55382	5.99696	5.69479	5.74852
AT1G17690	NUCLEOLAR FACTOR 1 (NOF1)	6.54102	6.8973	7.5233	6.9872
AT1G17720	(ATB BETA)	21.2057	19.9666	23.0137	21.3953
AT1G17730	VACUOLAR PROTEIN SORTING 46.1 (VPS46.1)	20.396	20.7749	18.7332	19.968
AT1G17745	3-PHOSPHOGLYCERATE DEHYDROGENASE (PGDH)	15.4992	18.6623	26.786	20.3158
AT1G17750	PEP1 RECEPTOR 2 (PEPR2)	1.00769	2.4182	1.5733	1.6664
AT1G17760	(CSTF77)	1.76363	1.89376	1.29964	1.65235
AT1G17780	transmembrane protein	9.44165	9.10315	8.89365	9.14615
AT1G17790	DNA-binding bromodomain-containing protein	4.66303	5.40243	3.18671	4.41739
AT1G17820	testis-expressed sequence 2-like protein (DUF2404)	4.4837	4.29063	5.07331	4.61588
AT1G17830	hypothetical protein (DUF789)	3.38294	5.42489	7.92769	5.57851
AT1G17840	ATP-BINDING CASSETTE G11 (ABCG11)	12.9558	15.5337	4.94913	11.1462
AT1G17850	Rhodanese/Cell cycle control phosphatase superfamily protein	2.01091	2.59555	1.33585	1.98077
AT1G17860	Kunitz family trypsin and protease inhibitor protein	26.6651	14.312	67.1704	36.0492
AT1G17870	ETHYLENE-DEPENDENT GRAVITROPISM-DEFICIENT AND YELLOW-GREEN-LIKE 3 (EGY3)	1.87415	1.92517	1.23793	1.67908
AT1G17880	BASIC TRANSCRIPTION FACTOR 3 (BTF3)	73.0285	79.1578	81.9985	78.0616
AT1G17890	(GER2)	30.5273	35.884	43.3126	36.5746
AT1G17930	MAIN; MAINTENANCE OF MERISTEMS	7.59466	7.52291	7.2825	7.46669
AT1G17940	Endosomal targeting BRO1-like domain-containing protein	1.18546	1.80992	0.901263	1.29888
AT1G17960	Threonyl-tRNA synthetase	9.2645	1.28868	9.09803	6.55041
AT1G17980	POLY(A) POLYMERASE 1 (PAPS1)	6.91878	7.06887	8.24399	7.41055
AT1G18030	Protein phosphatase 2C family protein	2.46251	3.18412	2.33702	2.66122
AT1G18040	CYCLIN-DEPENDENT KINASE D1;3 (CDKD1;3)	3.48293	4.73509	2.58327	3.60043
AT1G18070	Translation elongation factor EF1A/initiation factor IF2gamma family protein	32.5741	27.5779	38.6445	32.9322
AT1G18075	MICRORNA159B (MIR159B)	5.02689	8.34848	3.82766	5.73435
AT1G18080	(ATARCA)	237.337	268.166	291.753	265.752
AT1G18090	5'-3' exonuclease family protein	0.892748	1.10148	1.01033	1.00152
AT1G18100	(E12A11)	4.41428	1.2105	11.4095	5.67809
AT1G18150	(ATMPK8)	6.25108	5.98356	7.23954	6.49139
AT1G18160	Protein kinase superfamily protein	13.9969	15.0697	13.6035	14.2234
AT1G18190	GOLGIN CANDIDATE 2 (GC2)	8.78914	9.32184	8.69031	8.93376
AT1G18210	Calcium-binding EF-hand family protein	40.5839	37.0441	48.0769	41.9016
AT1G18250	(ATLP-1)	22.584	39.3666	16.5059	26.1522
AT1G18260	EMS-MUTAGENIZED BRI1 SUPPRESSOR 5 (EBS5)	25.1582	22.9294	24.527	24.2049
AT1G18265	zein-binding protein (Protein of unknown function%2C DUF593)	7.19254	5.63631	1.48363	4.77082
AT1G18270	ketose-bisphosphate aldolase class-II family protein	6.33959	5.07679	5.93126	5.78255
AT1G18300	NUDIX HYDROLASE HOMOLOG 4 (NUDT4)	4.20542	2.60267	2.57172	3.12661
AT1G18320	Mitochondrial import inner membrane translocase subunit Tim17/Tim22/Tim23 family protein	2.53742	2.70497	2.9059	2.7161
AT1G18330	EARLY-PHYTOCHROME-RESPONSIVE1 (EPR1)	4.03756	4.30154	2.5228	3.62063
AT1G18335	Acyl-CoA N-acyltransferases (NAT) superfamily protein	2.99729	3.26185	3.36352	3.20756
AT1G18340	basal transcription factor complex subunit-like protein	3.11994	2.95686	2.96523	3.01401
AT1G18360	alpha/beta-Hydrolases superfamily protein	3.99313	3.53842	3.66188	3.73115
AT1G18370	HINKEL (HIK)	5.69297	9.78678	6.03167	7.17047
AT1G18390	LEAF RUST 10 DISEASE-RESISTANCE LOCUS RECEPTOR- LIKE PROTEIN KINASE-LIKE 1.1; LRK10L1.1	1.26079	0.838353	2.37881	1.49265
AT1G18440	Peptidyl-tRNA hydrolase family protein	3.01691	3.44476	2.83539	3.09902
AT1G18450	ACTIN-RELATED PROTEIN 4 (ARP4)	12.5062	15.0724	11.1512	12.9099
AT1G18460	alpha/beta-Hydrolases superfamily protein	2.67412	3.02932	2.08214	2.59519
AT1G18470	Transmembrane Fragile-X-F-associated protein	9.63171	5.79096	8.06742	7.83003
AT1G18480	SHEWENELLA-LIKE PROTEIN PHOSPHATASE 2 (SLP2)	34.0286	32.2763	41.3611	35.8887
AT1G18485	Pentatricopeptide repeat (PPR) superfamily protein	1.11573	1.04871	1.24146	1.1353
AT1G18490	PCO3; PLANT CYSTEINE OXIDASE 3	3.29182	3.47079	2.33096	3.03119
AT1G18500	METHYLTHIOALKYLMALATE SYNTHASE-LIKE 4 (MAML-4)	19.4064	27.7901	21.9337	23.0434
AT1G18540	Ribosomal protein L6 family protein	291.342	333.271	411.217	345.277
AT1G18550	ATP binding microtubule motor family protein	2.97027	4.22553	2.96017	3.38532
AT1G18560	BED zinc finger and hAT dimerization domain-containing protein	2.64768	2.72207	2.59676	2.6555
AT1G18570	MYB DOMAIN PROTEIN 51 (MYB51)	16.0019	11.9386	17.4385	15.1263
AT1G18580	GALACTURONOSYLTRANSFERASE 11 (GAUT11)	10.6681	10.0296	10.4874	10.395
AT1G18590	SULFOTRANSFERASE 17 (SOT17)	4.16952	3.74491	3.4922	3.80221
AT1G18600	RHOMBOID-LIKE PROTEIN 12 (RBL12)	4.79027	4.49386	4.45498	4.57971
AT1G18610	Galactose oxidase/kelch repeat superfamily protein	5.28306	4.26763	3.65843	4.40304
AT1G18620	TON1 RECRUITING MOTIF 3 (TRM3)	2.44252	2.24053	1.514	2.06568
AT1G18630	GLYCINE-RICH RNA-BINDING PROTEIN 6 (GR-RBP6)	4.50492	5.13072	4.90067	4.84544
AT1G18640	3-PHOSPHOSERINE PHOSPHATASE (PSP)	7.54882	9.12321	7.70425	8.12543
AT1G18650	PLASMODESMATA CALLOSE-BINDING PROTEIN 3 (PDCB3)	3.11954	4.98312	3.09906	3.73391
AT1G18660	zinc finger (C3HC4-type RING finger) family protein	5.55366	5.37008	5.81546	5.57973
AT1G18670	IMPAIRED IN BABA-INDUCED STERILITY 1 (IBS1)	16.313	21.4651	20.5823	19.4535
AT1G18680	HNH endonuclease domain-containing protein	2.15266	2.57751	2.7175	2.48256
AT1G18690	XYLOGLUCAN XYLOSYLTRANSFERASE 4 (XXT4)	4.13548	4.92588	3.60786	4.22307
AT1G18700	DNAJ heat shock N-terminal domain-containing protein	7.88497	7.29498	7.58837	7.58944
AT1G18720	ER membrane protein%2C putative (DUF962)	29.7182	24.5306	35.1311	29.7933
AT1G18740	ROH1%2C putative (DUF793)	31.3139	19.4973	24.5273	25.1129
AT1G18745		8.16497	14.8344	12.293	11.7641
AT1G18773	acyl thioesterase-like protein	0.807955	1.68659	0.627021	1.04052
AT1G18800	NAP1-RELATED PROTEIN 2 (NRP2)	21.1142	23.4516	19.1375	21.2344
AT1G18830	Transducin/WD40 repeat-like superfamily protein	8.35206	0.688874	12.2089	7.08329
AT1G18840	IQ-DOMAIN 30 (IQD30)	8.77138	9.82997	5.55593	8.05243
AT1G18850	hypothetical protein	17.1361	21.471	20.0649	19.5573
AT1G18860	WRKY DNA-BINDING PROTEIN 61 (WRKY61)	0.942543	0.513662	4.33542	1.93054
AT1G18890	CALCIUM-DEPENDENT PROTEIN KINASE 1 (CDPK1)	18.2812	14.2642	20.3095	17.6183
AT1G18900	Pentatricopeptide repeat (PPR) superfamily protein	7.78552	8.70131	7.80936	8.09873
AT1G18910	zinc ion binding protein	3.9851	6.08978	6.45883	5.51124
AT1G18950	DDT domain superfamily	9.91172	11.1814	9.07929	10.0575
AT1G18980	RmlC-like cupins superfamily protein	2.12132	0.912371	3.15907	2.06425
AT1G19000	Homeodomain-like superfamily protein	41.8876	36.1434	32.8928	36.9746
AT1G19010	hypothetical protein	2.37978	2.4817	2.46258	2.44135
AT1G19020	CDP-diacylglycerol-glycerol-3-phosphate 3-phosphatidyltransferase	26.603	14.408	49.0129	30.008
AT1G19025	DNA repair metallo-beta-lactamase family protein	1.45604	1.14921	2.193	1.59942
AT1G19050	RESPONSE REGULATOR 7 (ARR7)	7.18531	8.89798	8.6443	8.24253
AT1G19070	F-box family protein	4.8698	4.75875	4.11669	4.58175
AT1G19080	TITAN 10 (TTN10)	4.18328	4.36183	4.77936	4.44149
AT1G19100	DEFECTIVE IN MERISTEM SILENCING 11 (DMS11)	3.22607	3.07919	3.20979	3.17168
AT1G19110	inter-alpha-trypsin inhibitor heavy chain-like protein	8.61194	12.7531	6.83421	9.39975
AT1G19115	DEEPER ROOTING 2; DRO2	8.24186	12.6724	7.31667	9.41032
AT1G19120	Small nuclear ribonucleoprotein family protein	18.5673	21.2179	17.4238	19.0697
AT1G19130	RmlC-like jelly roll fold protein	47.2171	36.4024	49.8354	44.485
AT1G19140	ubiquinone biosynthesis COQ9-like protein	8.69569	9.46777	10.4311	9.53154
AT1G19170	Pectin lyase-like superfamily protein	4.45637	6.61809	4.05264	5.04237
AT1G19180	JASMONATE-ZIM-DOMAIN PROTEIN 1 (JAZ1)	113.641	145.649	161.092	140.128
AT1G19190	alpha/beta-Hydrolases superfamily protein	3.64572	3.27858	2.7134	3.21257
AT1G19200	cyclin-dependent kinase%2C putative (DUF581)	7.85452	5.51055	8.23859	7.20122
AT1G19220	AUXIN RESPONSE FACTOR 19 (ARF19)	14.5017	24.8441	20.5439	19.9632
AT1G19230	Riboflavin synthase-like superfamily protein	1.16323	2.80101	2.67453	2.21292
AT1G19240	transmembrane protein	4.36546	5.53375	4.33418	4.74446
AT1G19250	FLAVIN-DEPENDENT MONOOXYGENASE 1 (FMO1)	1.21459	2.63475	3.14293	2.33076
AT1G19270	DA1 (DA1)	7.57801	6.48881	8.47554	7.51412
AT1G19290	Pentatricopeptide repeat (PPR) superfamily protein	5.381	7.74667	4.37544	5.83437
AT1G19300	PARVUS (PARVUS)	5.60493	4.24646	5.55129	5.13423
AT1G19310	RING/U-box superfamily protein	8.5323	6.19248	8.57442	7.7664
AT1G19330	histone deacetylase complex subunit	3.02908	5.01959	2.08137	3.37668
AT1G19340	Methyltransferase MT-A70 family protein	1.37079	2.15736	1.59911	1.70908
AT1G19350	BRI1-EMS-SUPPRESSOR 1 (BES1)	25.4312	30.0655	21.9019	25.7995
AT1G19360	REDUCED RESIDUAL ARABINOSE 3 (RRA3)	35.2374	37.5388	39.244	37.3401
AT1G19370	membrane protein	14.172	16.4863	13.0518	14.57
AT1G19380	sugar%2C putative (DUF1195)	38.7235	22.771	53.3329	38.2758
AT1G19394	hypothetical protein	3.46526	2.49963	2.76352	2.90947
AT1G19396	hypothetical protein	1.56192	1.65136	1.38576	1.53301
AT1G19397	transmembrane protein	5.58231	4.68483	6.07534	5.44749
AT1G19400	Erythronate-4-phosphate dehydrogenase family protein	9.97925	8.16962	10.8456	9.66483
AT1G19430	S-adenosyl-L-methionine-dependent methyltransferases superfamily protein	8.96448	11.0166	7.04438	9.00848
AT1G19440	3-KETOACYL-COA SYNTHASE 4 (KCS4)	8.00968	11.665	8.01957	9.23141
AT1G19450	Major facilitator superfamily protein	2.84225	2.73254	4.68281	3.4192
AT1G19480	DNA glycosylase superfamily protein	3.60261	3.6417	2.53277	3.25903
AT1G19485	Transducin/WD40 repeat-like superfamily protein	7.36525	7.42743	6.13914	6.97728
AT1G19490	Basic-leucine zipper (bZIP) transcription factor family protein	3.83599	4.08311	4.21337	4.04416
AT1G19520	NUCLEAR FUSION DEFECTIVE 5 (NFD5)	19.4273	22.0345	21.3967	20.9528
AT1G19530	DNA polymerase epsilon catalytic subunit A	128.803	143.97	91.4493	121.407
AT1G19540	NmrA-like negative transcriptional regulator family protein	11.2514	5.93866	10.5046	9.23157
AT1G19550	DEHYDROASCORBATE REDUCTASE; DHAR	6.19461	5.76901	4.19802	5.38721
AT1G19570	DEHYDROASCORBATE REDUCTASE (DHAR1)	23.9442	21.8525	12.533	19.4432
AT1G19580	GAMMA CARBONIC ANHYDRASE 1 (GAMMA CA1)	10.9422	11.1446	10.4761	10.8543
AT1G19600	pfkB-like carbohydrate kinase family protein	35.3139	32.3665	44.5722	37.4175
AT1G19610	(PDF1.4)	9.33743	3.8091	8.76466	7.30373
AT1G19650	Sec14p-like phosphatidylinositol transfer family protein	5.2689	4.72495	5.58344	5.19243
AT1G19660	ATBBD2; BBD2; BIFUNCTIONAL NUCLEASE IN BASAL DEFENSE RESPONSE 2	16.2513	13.4704	11.5355	13.7524
AT1G19680	RING/U-box superfamily protein	15.4352	21.7325	14.5162	17.228
AT1G19690	NAD(P)-binding Rossmann-fold superfamily protein	3.36292	5.08889	2.1712	3.54101
AT1G19700	BEL1-LIKE HOMEODOMAIN 10 (BEL10)	3.22003	2.64085	2.82979	2.89689
AT1G19710	UDP-Glycosyltransferase superfamily protein	14.322	12.8366	13.8504	13.6697
AT1G19715	Mannose-binding lectin superfamily protein	1.20845	1.00115	1.07399	1.09453
AT1G19720	Pentatricopeptide repeat (PPR-like) superfamily protein	2.30186	1.57261	1.51203	1.7955
AT1G19730	(ATTRX4)	8.85272	9.67265	7.88057	8.80198
AT1G19740	ATP-dependent protease La (LON) domain protein	12.106	12.0915	11.1001	11.7659
AT1G19770	PURINE PERMEASE 14 (PUP14)	68.5888	35.7293	40.6144	48.3108
AT1G19790	SHI-RELATED SEQUENCE 7 (SRS7)	6.9351	10.2402	4.20112	7.12547
AT1G19800	ATP-BINDING CASSETTE I14 (ABCI14)	12.4706	11.5995	13.7289	12.5997
AT1G19835	filament-like protein (DUF869)	17.4162	15.1006	15.1065	15.8744
AT1G19840	SAUR53; SMALL AUXIN UPREGULATED RNA 53	16.1905	36.8387	14.8817	22.637
AT1G19850	MONOPTEROS (MP)	67.0129	68.0701	60.8565	65.3132
AT1G19860	Zinc finger C-x8-C-x5-C-x3-H type family protein	4.81386	3.70882	4.39662	4.30644
AT1G19870	IQ-DOMAIN 32 (iqd32)	25.5261	31.42	26.2776	27.7412
AT1G19880	Regulator of chromosome condensation (RCC1) family protein	19.9975	20.073	19.4842	19.8516
AT1G19910	(AVA-P2)	101.688	86.8779	128.719	105.762
AT1G19920	(APS2)	36.4403	22.8408	33.3178	30.8663
AT1G19950	HVA22-LIKE PROTEIN H (ATHVA22H) (HVA22H)	1.39712	2.74695	1.60105	1.91504
AT1G19960	transcription factor	21.0375	40.082	2.87171	21.3304
AT1G19970	ER lumen protein retaining receptor family protein	4.54476	5.3783	3.33365	4.4189
AT1G19980	cytomatrix protein-like protein	4.75706	4.58834	3.89013	4.41185
AT1G19990	nucleolin	7.76001	7.9372	7.4695	7.72224
AT1G20050	HYDRA1 (HYD1)	43.1647	56.8625	29.835	43.2874
AT1G20060	ATP binding microtubule motor family protein	1.73841	2.35838	1.71345	1.93674
AT1G20070	hypothetical protein	3.31794	1.62853	1.69815	2.21487
AT1G20090	RHO-RELATED PROTEIN FROM PLANTS 2 (ROP2)	20.9193	21.6633	20.311	20.9645
AT1G20100	DNA ligase-like protein	68.0641	83.7366	99.9473	83.916
AT1G20110	FREE1; FYVE DOMAIN PROTEIN REQUIRED FOR ENDOSOMAL SORTING 1; FYVE-DOMAIN PROTEIN 1; FYVE1	32.4276	30.313	36.0025	32.9143
AT1G20140	SKP1-LIKE 4 (SK4)	23.5223	17.2773	24.7527	21.8507
AT1G20180	transmembrane protein (DUF677)	4.94563	0.877779	3.88291	3.23544
AT1G20200	EMBRYO DEFECTIVE 2719 (emb2719)	28.7285	29.8029	31.8584	30.1299
AT1G20220	Alba DNA/RNA-binding protein	20.5048	26.7514	30.3029	25.853
AT1G20225	Thioredoxin superfamily protein	16.0352	16.2123	19.6323	17.2933
AT1G20230	Pentatricopeptide repeat (PPR) superfamily protein	1.6318	1.56236	1.56814	1.58743
AT1G20260	V-ATPASE B SUBUNIT 3 (VAB3)	12.2745	12.5662	15.1125	13.3177
AT1G20270	2-oxoglutarate (2OG) and Fe(II)-dependent oxygenase superfamily protein	16.6884	21.9313	17.9905	18.8701
AT1G20300	Pentatricopeptide repeat (PPR) superfamily protein	6.8642	8.85219	7.94666	7.88768
AT1G20330	STEROL METHYLTRANSFERASE 2 (SMT2)	72.2034	99.0355	63.304	78.181
AT1G20340	DNA-DAMAGE-REPAIR/TOLERATION PROTEIN 112 (DRT112)	37.4688	2.48293	9.68116	16.5443
AT1G20350	TRANSLOCASE INNER MEMBRANE SUBUNIT 17-1 (TIM17-1)	14.6592	0.698837	9.06113	8.13973
AT1G20370	Pseudouridine synthase family protein	11.9281	12.24	13.9779	12.7153
AT1G20380	Prolyl oligopeptidase family protein	3.08901	3.01888	3.29953	3.13581
AT1G20410	Pseudouridine synthase family protein	6.70832	6.54993	7.08881	6.78235
AT1G20430	hypothetical protein	48.3024	53.1379	50.7897	50.7433
AT1G20440	COLD-REGULATED 47 (COR47)	29.1653	3.80979	2.90803	11.961
AT1G20450	EARLY RESPONSIVE TO DEHYDRATION 10 (ERD10)	37.2704	11.5116	20.4174	23.0665
AT1G20460	NADH-ubiquinone oxidoreductase chain	5.82408	5.30055	6.25311	5.79258
AT1G20470	SAUR-like auxin-responsive protein family	2.65843	3.04968	2.10082	2.60298
AT1G20480	AMP-dependent synthetase and ligase family protein	2.2151	3.01829	1.94321	2.3922
AT1G20510	OPC-8:0 COA LIGASE1 (OPCL1)	25.7771	28.4186	37.8258	30.6738
AT1G20540	Transducin/WD40 repeat-like superfamily protein	2.60655	4.2235	2.4244	3.08482
AT1G20550	O-fucosyltransferase family protein	2.81085	2.26853	2.84124	2.64021
AT1G20560	ACYL ACTIVATING ENZYME 1 (AAE1)	12.4132	14.2619	10.9114	12.5288
AT1G20575	DOLICHOL PHOSPHATE MANNOSE SYNTHASE 1 (DPMS1)	9.02912	7.33673	9.22263	8.52949
AT1G20580	Small nuclear ribonucleoprotein family protein	29.5427	30.5303	31.4891	30.5207
AT1G20590	cyclin	1.9661	3.03562	1.43868	2.1468
AT1G20600	AP2/B3-like transcriptional factor family protein	1.58847	1.51861	1.76001	1.62236
AT1G20610	CYCLIN B2;3 (CYCB2;3)	5.29298	6.62868	4.23551	5.38572
AT1G20620	CATALASE 3 (CAT3)	154.429	140.698	60.7311	118.619
AT1G20630	CATALASE 1 (CAT1)	52.6717	33.8817	54.6087	47.054
AT1G20640	NIN-LIKE PROTEIN 4; NLP4	3.4251	5.89709	2.53131	3.95117
AT1G20650	ALTERED SEED GERMINATION 5 (ASG5)	2.32931	4.22241	2.00473	2.85215
AT1G20670	DNA-binding bromodomain-containing protein	9.59219	9.67722	11.9436	10.4043
AT1G20693	HIGH MOBILITY GROUP B2 (HMGB2)	61.5866	80.5316	39.1913	60.4365
AT1G20696	HIGH MOBILITY GROUP B3 (HMGB3)	69.2877	82.57	59.4546	70.4374
AT1G20700	WUSCHEL RELATED HOMEOBOX 14 (WOX14)	6.70101	7.9731	7.4949	7.38967
AT1G20720	RAD3-like DNA-binding helicase protein	1.72971	2.02278	1.2626	1.6717
AT1G20760	Calcium-binding EF hand family protein	14.8094	15.0382	15.3871	15.0782
AT1G20770	coiled-coil protein	15.3454	15.775	16.7607	15.9604
AT1G20780	SENESCENCE-ASSOCIATED E3 UBIQUITIN LIGASE 1 (SAUL1)	10.7224	9.47186	13.0269	11.0737
AT1G20810	FKBP-like peptidyl-prolyl cis-trans isomerase family protein	2.01219	2.41303	1.91555	2.11359
AT1G20816	outer envelope pore-like protein	1.04123	1.71706	0.538051	1.09878
AT1G20823	ATATL80	1.3266	1.44908	0.911852	1.22918
AT1G20830	MULTIPLE CHLOROPLAST DIVISION SITE 1 (MCD1)	4.43066	3.96559	3.78133	4.0592
AT1G20840	TONOPLAST MONOSACCHARIDE TRANSPORTER1 (TMT1)	2.72587	3.19961	4.01114	3.31221
AT1G20850	XYLEM CYSTEINE PEPTIDASE 2 (XCP2)	5.00733	0.424326	3.19873	2.8768
AT1G20880	RNA-binding (RRM/RBD/RNP motifs) family protein	2.61989	2.18212	2.14434	2.31545
AT1G20890	caveolin-1 protein	2.55008	3.58498	1.78884	2.6413
AT1G20900	ESCAROLA (ESC)	9.58231	19.3675	13.1675	14.0391
AT1G20910	ARID/BRIGHT DNA-binding domain-containing protein	4.24773	4.15505	4.54722	4.31667
AT1G20920	P-loop containing nucleoside triphosphate hydrolases superfamily protein	30.8686	30.0225	24.0863	28.3258
AT1G20930	CYCLIN-DEPENDENT KINASE B2;2 (CDKB2;2)	6.11463	7.091	4.9663	6.05731
AT1G20950	Phosphofructokinase family protein	20.1776	21.8341	23.4872	21.833
AT1G20960	EMBRYO DEFECTIVE 1507 (emb1507)	46.2268	44.9317	52.2635	47.8073
AT1G20970	calponin-like domain protein	49.9455	43.3756	65.2953	52.8721
AT1G20980	SQUAMOSA PROMOTER BINDING PROTEIN-LIKE 14 (SPL14)	32.9305	27.6246	34.6285	31.7279
AT1G21000	PLATZ transcription factor family protein	24.2135	28.592	23.0653	25.2903
AT1G21010	poly polymerase	13.7343	6.65348	29.0448	16.4775
AT1G21050	MIZU-KUSSEI-like protein (Protein of unknown function%2C DUF617)	5.97952	11.7519	4.38778	7.37307
AT1G21060	Serine/Threonine-kinase%2C putative (Protein of unknown function%2C DUF547)	1.62526	3.62195	2.31284	2.52002
AT1G21065	secondary thiamine-phosphate synthase enzyme	5.95472	7.94994	6.43712	6.78059
AT1G21080	DNAJ heat shock N-terminal domain-containing protein	12.4803	11.5681	15.4878	13.1787
AT1G21090	Cupredoxin superfamily protein	4.82186	7.4562	3.58344	5.28717
AT1G21100	INDOLE GLUCOSINOLATE O-METHYLTRANSFERASE 1 (IGMT1)	1.90198	1.52777	6.6653	3.36502
AT1G21110	INDOLE GLUCOSINOLATE O-METHYLTRANSFERASE 3 (IGMT3)	8.51674	4.43737	13.035	8.66303
AT1G21120	INDOLE GLUCOSINOLATE O-METHYLTRANSFERASE 2 (IGMT2)	31.9309	13.654	28.4594	24.6814
AT1G21130	INDOLE GLUCOSINOLATE O-METHYLTRANSFERASE 4 (IGMT4)	18.2996	7.85649	25.6769	17.2777
AT1G21140	Vacuolar iron transporter (VIT) family protein	1.72258	1.0432	0.905064	1.22361
AT1G21150	Mitochondrial transcription termination factor family protein	3.04321	3.66307	2.17399	2.96009
AT1G21160	eukaryotic translation initiation factor 2 (eIF-2) family protein	12.6607	11.276	16.5576	13.4981
AT1G21170	(SEC5B)	5.90004	6.54474	6.06167	6.16882
AT1G21190	LSM3A; SM-LIKE 3A	13.5727	15.876	14.3517	14.6002
AT1G21200	sequence-specific DNA binding transcription factor	8.1652	9.15923	7.5475	8.29064
AT1G21280	Copia-like polyprotein/retrotransposon	9.22463	8.44488	6.89182	8.18711
AT1G21310	EXTENSIN 3 (EXT3)	166.633	353.82	166.044	228.832
AT1G21350	Thioredoxin superfamily protein	3.87313	4.6394	4.03728	4.18327
AT1G21370	transmembrane protein	12.9052	12.024	15.4339	13.4544
AT1G21380	Target of Myb protein 1	18.9286	14.3804	18.4248	17.2446
AT1G21390	EMBRYO DEFECTIVE 2170 (emb2170)	5.48658	6.20983	7.29313	6.32985
AT1G21400	Thiamin diphosphate-binding fold (THDP-binding) superfamily protein	9.13477	3.4493	10.5453	7.70978
AT1G21410	(SKP2A)	11.3988	7.13565	10.1331	9.55586
AT1G21440	Phosphoenolpyruvate carboxylase family protein	10.2418	10.0845	10.7203	10.3488
AT1G21450	SCARECROW-LIKE 1 (SCL1)	26.233	23.9706	21.6912	23.9649
AT1G21460	(SWEET1)	3.28518	0.803293	0.121079	1.40319
AT1G21480	Exostosin family protein	4.65857	4.23563	4.4355	4.44323
AT1G21510	TPRXL	2.01738	2.263	0.246935	1.50911
AT1G21520	hypothetical protein	59.3794	68.9915	51.4929	59.9546
AT1G21525		14.1683	19.0337	11.2365	14.8128
AT1G21550	Calcium-binding EF-hand family protein	2.54159	0.0594372	3.25041	1.95048
AT1G21560	hypothetical protein	10.5152	11.0726	9.79032	10.4594
AT1G21580	Zinc finger C-x8-C-x5-C-x3-H type family protein	19.1845	19.1307	18.21	18.8417
AT1G21590	kinase with adenine nucleotide alpha hydrolases-like domain-containing protein	5.91381	5.90519	8.61084	6.80994
AT1G21600	PLASTID TRANSCRIPTIONALLY ACTIVE 6 (PTAC6)	4.80073	5.35846	3.12573	4.42831
AT1G21610	UBINUCLEIN 1; UBN1	8.92523	9.13916	8.20116	8.75518
AT1G21630	Calcium-binding EF hand family protein	22.2522	20.7225	24.0725	22.3491
AT1G21640	NAD KINASE 2 (NADK2)	8.57121	7.69765	10.0786	8.78248
AT1G21650	(SECA2)	1.33303	1.18525	1.46087	1.32638
AT1G21660	Chaperone DnaJ-domain superfamily protein	12.2577	12.7123	13.8408	12.9369
AT1G21670	DPP6 amino-terminal domain protein	1.44496	0.67957	2.02968	1.38474
AT1G21680	DPP6 N-terminal domain-like protein	30.6453	36.0361	24.9845	30.5553
AT1G21690	EMBRYO DEFECTIVE 1968 (emb1968)	7.76982	8.04272	7.144	7.65218
AT1G21695	hydroxyproline-rich glycoprotein family protein	1.72928	1.71001	1.30766	1.58231
AT1G21700	SWITCH/SUCROSE NONFERMENTING 3C (SWI3C)	12.2993	12.8207	12.9445	12.6882
AT1G21710	8-OXOGUANINE-DNA GLYCOSYLASE 1 (OGG1)	8.88789	11.131	6.86711	8.96201
AT1G21720	PROTEASOME BETA SUBUNIT C1 (PBC1)	35.7119	30.9507	40.1073	35.59
AT1G21730	KIN7.1; KINESIN 7.1	3.20876	4.54266	3.90021	3.88388
AT1G21740	DUF630 family protein%2C putative (DUF630 and DUF632)	6.35482	11.7714	3.85433	7.32684
AT1G21750	PDI-LIKE 1-1 (PDIL1-1)	47.3388	40.2417	73.7583	53.7796
AT1G21760	F-BOX PROTEIN 7 (FBP7)	3.11348	3.61062	2.72975	3.15128
AT1G21770	Acyl-CoA N-acyltransferases (NAT) superfamily protein	3.63531	2.70188	3.06859	3.13526
AT1G21780	BTB/POZ domain-containing protein	11.9588	12.1885	10.4997	11.549
AT1G21790	TRAM%2C LAG1 and CLN8 (TLC) lipid-sensing domain containing protein	4.59767	3.45472	3.03923	3.69721
AT1G21830	hypothetical protein	10.5137	9.62062	12.8924	11.0089
AT1G21840	UREASE ACCESSORY PROTEIN F (UREF)	4.83606	6.49774	3.33541	4.88974
AT1G21880	LYSM DOMAIN GPI-ANCHORED PROTEIN 1 PRECURSOR (LYM1)	15.9615	20.632	15.3148	17.3028
AT1G21900	P24 SUBFAMILY DELTA 5; P24DELTA5	19.4733	17.7599	27.6726	21.6353
AT1G21910	DEHYDRATION RESPONSE ELEMENT-BINDING PROTEIN 26 (DREB26)	27.173	10.91	23.8713	20.6515
AT1G21920	Histone H3 K4-specific methyltransferase SET7/9 family protein	34.4165	41.2974	25.0222	33.5787
AT1G21930	transmembrane protein	2.4097	4.81321	3.19724	3.47338
AT1G21970	LEAFY COTYLEDON 1 (LEC1)	4.04425	1.3785	1.50492	2.30922
AT1G21980	PHOSPHATIDYLINOSITOL-4-PHOSPHATE 5-KINASE 1 (PIP5K1)	69.2374	70.4606	79.3741	73.024
AT1G21990	F-box/RNI-like/FBD-like domains-containing protein	21.1591	18.0944	19.7093	19.6543
AT1G22020	SERINE HYDROXYMETHYLTRANSFERASE 6 (SHM6)	12.6682	11.5898	14.0589	12.7723
AT1G22030	BPS1-like protein	14.7667	19.1932	9.19958	14.3865
AT1G22040	Galactose oxidase/kelch repeat superfamily protein	9.15486	8.42276	9.78901	9.12221
AT1G22050	MEMBRANE-ANCHORED UBIQUITIN-FOLD PROTEIN 6 PRECURSOR (MUB6)	2.58739	2.81606	2.08207	2.49517
AT1G22060	sporulation-specific protein	9.03196	10.4999	8.74216	9.42466
AT1G22065	hypothetical protein	10.6725	2.69552	30.1157	14.4946
AT1G22070	TGA1A-RELATED GENE 3 (TGA3)	9.29786	10.6237	7.42491	9.1155
AT1G22140	zinc finger CCCH domain protein	16.1729	15.4806	17.1579	16.2704
AT1G22170	Phosphoglycerate mutase family protein	6.30828	7.27984	5.11028	6.2328
AT1G22180	Sec14p-like phosphatidylinositol transfer family protein	9.67829	8.76305	12.7564	10.3993
AT1G22190	RAP2.4; RELATED TO AP2 4; WIND2	53.4063	34.6766	42.2619	43.4482
AT1G22200	Endoplasmic reticulum vesicle transporter protein	10.9548	11.514	11.1184	11.1957
AT1G22220	AUXIN UP-REGULATED F-BOX PROTEIN 2 (AUF2)	21.0565	27.9582	16.0732	21.696
AT1G22230	nucleolar GTP-binding protein	1.13449	2.83854	3.17531	2.38278
AT1G22270	Trm112p-like protein	32.655	35.3682	33.6141	33.8791
AT1G22280	PHYTOCHROME-ASSOCIATED PROTEIN PHOSPHATASE TYPE 2C (PAPP2C)	34.6611	32.2902	45.2685	37.4066
AT1G22300	GENERAL REGULATORY FACTOR 10 (GRF10)	106.003	102.126	122.537	110.222
AT1G22310	METHYL-CPG-BINDING DOMAIN 8 (MBD8)	5.98681	7.43632	7.15542	6.85951
AT1G22360	UDP-GLUCOSYL TRANSFERASE 85A2 (UGT85A2)	64.8874	67.1774	144.919	92.3278
AT1G22400	(UGT85A1)	15.9909	17.5219	6.65445	13.3891
AT1G22403		3.41868	3.96151	4.99173	4.12397
AT1G22410	Class-II DAHP synthetase family protein	96.6602	104.768	195.615	132.348
AT1G22440	Zinc-binding alcohol dehydrogenase family protein	14.5978	23.1074	20.3979	19.3677
AT1G22450	CYTOCHROME C OXIDASE 6B (COX6B)	34.6009	35.0092	40.2679	36.626
AT1G22470	hypothetical protein	3.18306	2.26179	4.8107	3.41851
AT1G22490	basic helix-loop-helix (bHLH) DNA-binding superfamily protein	0.935701	1.2998	2.54483	1.59345
AT1G22510	E3 ubiquitin-protein ligase RNF170-like protein (DUF 1232)	8.10587	6.69913	9.65076	8.15192
AT1G22520	MICOS complex subunit Mic10-like protein (DUF543)	7.4433	7.47653	8.21943	7.71309
AT1G22530	PATELLIN 2 (PATL2)	40.6686	28.513	32.7254	33.969
AT1G22540	NPF5.10	2.85478	2.96576	2.84523	2.88859
AT1G22550	Major facilitator superfamily protein	2.9579	3.71057	2.58486	3.08444
AT1G22570	Major facilitator superfamily protein	9.71967	12.298	6.03785	9.35183
AT1G22610	C2 calcium/lipid-binding plant phosphoribosyltransferase family protein	21.0503	20.7914	22.0128	21.2848
AT1G22620	SUPPRESSOR OF ACTIN 1 (ATSAC1)	6.58796	5.34851	6.18076	6.03908
AT1G22640	MYB DOMAIN PROTEIN 3 (MYB3)	12.8927	16.857	13.5334	14.4277
AT1G22660	Polynucleotide adenylyltransferase family protein	3.76067	3.81511	3.79868	3.79149
AT1G22700	Tetratricopeptide repeat (TPR)-like superfamily protein	6.94229	5.98365	6.01044	6.31213
AT1G22730	MA3 domain-containing protein	16.6813	14.3161	14.5295	15.1756
AT1G22750	transmembrane protein	1.79179	1.02447	2.39656	1.7376
AT1G22770	GIGANTEA (GI)	15.1019	14.4006	12.3232	13.9419
AT1G22780	POINTED FIRST LEAVES (PFL)	88.8122	115.012	114.552	106.125
AT1G22790	Low affinity potassium transport system protein	7.90991	9.47941	6.9568	8.11538
AT1G22800	S-adenosyl-L-methionine-dependent methyltransferases superfamily protein	7.19919	8.81349	7.22817	7.74695
AT1G22830	Tetratricopeptide repeat (TPR)-like superfamily protein	3.35802	3.52165	2.7294	3.20302
AT1G22840	CYTOCHROME C-1 (CYTC-1)	89.3805	74.7713	130.071	98.0742
AT1G22850	SNARE associated Golgi protein family	6.28559	6.03674	5.74383	6.02205
AT1G22860	Vacuolar sorting protein 39	5.06837	5.54449	4.81263	5.14183
AT1G22870	kinase family with ARM repeat domain-containing protein	5.23975	5.56677	5.73718	5.51457
AT1G22880	CELLULASE 5 (CEL5)	12.9023	11.2593	8.25444	10.8053
AT1G22882	ATSUN3; SUN-DOMAIN PROTEIN 3; SUN3	26.3308	15.88	25.4797	22.5635
AT1G22885	transmembrane protein	2.12566	2.7109	4.21374	3.01677
AT1G22900	Disease resistance-responsive (dirigent-like protein) family protein	0.43121	0.0726065	4.20275	1.56886
AT1G22910	RNA-binding (RRM/RBD/RNP motifs) family protein	4.29322	0.441657	2.57425	2.43637
AT1G22920	COP9 SIGNALOSOME 5A (CSN5A)	17.1089	14.947	16.4871	16.181
AT1G22930	T-complex protein 11	64.0447	50.7655	69.9607	61.5903
AT1G22940	THIAMINE REQUIRING 1 (TH1)	4.63434	5.10228	3.97885	4.57182
AT1G22950	2-oxoglutarate (2OG) and Fe(II)-dependent oxygenase superfamily protein	8.88392	10.2473	9.43148	9.52089
AT1G22960	Pentatricopeptide repeat (PPR) superfamily protein	7.38937	7.17758	9.14746	7.9048
AT1G22970	cyclin-D1-binding protein	10.7149	14.2108	11.4309	12.1189
AT1G22980	Grap2/cyclin-D-interacting protein	1.9995	1.87041	2.15466	2.00819
AT1G22985	CYTOKININ RESPONSE FACTOR 7 (CRF7)	56.5805	14.9835	39.3897	36.9846
AT1G22990	HEAVY METAL ASSOCIATED ISOPRENYLATED PLANT PROTEIN 22 (HIPP22)	6.03799	4.51753	4.6444	5.06664
AT1G23000	Heavy metal transport/detoxification superfamily protein	3.2777	4.39928	0.57351	2.75016
AT1G23010	LOW PHOSPHATE ROOT1 (LPR1)	2.75001	3.3884	1.69112	2.60984
AT1G23020	FERRIC REDUCTION OXIDASE 3 (FRO3)	3.6724	2.28329	7.95785	4.63785
AT1G23030	PLANT U-BOX PROTEIN 11; PUB11	10.921	7.61135	10.89	9.80744
AT1G23040	hydroxyproline-rich glycoprotein family protein	33.4206	14.9833	39.085	29.163
AT1G23080	PIN-FORMED 7 (PIN7)	83.5332	97.3046	105.797	95.5448
AT1G23100	GroES-like family protein	8.45259	8.49986	7.90405	8.2855
AT1G23120	Polyketide cyclase/dehydrase and lipid transport superfamily protein	9.76285	12.7325	15.6565	12.7173
AT1G23140	C2-DOMAIN ABA-RELATED8; CAR8	10.3872	9.38564	10.5647	10.1125
AT1G23160	Auxin-responsive GH3 family protein	16.3048	5.62407	0.437134	7.45533
AT1G23170	transmembrane protein (Protein of unknown function DUF2359%2C transmembrane)	3.39628	5.58339	3.47779	4.15249
AT1G23180	ARM repeat superfamily protein	4.45012	4.29322	5.15903	4.63412
AT1G23190	PHOSPHOGLUCOMUTASE 3 (PGM3)	28.1424	18.2615	32.035	26.1463
AT1G23220	Dynein light chain type 1 family protein	7.90575	10.9895	9.60077	9.49867
AT1G23230	mediator of RNA polymerase II transcription subunit	8.92665	9.52378	8.31088	8.92043
AT1G23260	MMS ZWEI HOMOLOGUE 1 (MMZ1)	20.5887	20.439	21.0221	20.6833
AT1G23280	MAK16 protein-like protein	19.104	23.0294	25.6612	22.5982
AT1G23290	(RPL27AB)	405.846	458.942	500.854	455.214
AT1G23310	GLUTAMATE:GLYOXYLATE AMINOTRANSFERASE (GGT1)	18.8929	16.7377	18.457	18.0292
AT1G23330	alpha/beta-Hydrolases superfamily protein	3.52553	3.71015	4.37903	3.87157
AT1G23360	(MENG)	5.21705	5.41951	5.25201	5.29619
AT1G23380	KNOTTED1-LIKE HOMEOBOX GENE 6 (KNAT6)	4.06589	5.27107	5.52452	4.95383
AT1G23390	Kelch repeat-containing F-box family protein	30.0832	18.9631	28.1313	25.7259
AT1G23400	(CAF2)	4.42825	3.86521	5.24347	4.51231
AT1G23410	Ribosomal protein S27a / Ubiquitin family protein	41.3533	75.2538	77.5847	64.7306
AT1G23440	Peptidase C15%2C pyroglutamyl peptidase I-like protein	40.7306	31.4813	51.4847	41.2322
AT1G23450	PPR superfamily protein	7.70646	2.80583	4.01741	4.84323
AT1G23460	Pectin lyase-like superfamily protein	6.68202	1.9692	4.45379	4.36834
AT1G23470		1.40876	1.2995	1.11393	1.27407
AT1G23480	CELLULOSE SYNTHASE-LIKE A3 (CSLA03)	0.703127	2.42081	2.13324	1.75239
AT1G23490	ADP-RIBOSYLATION FACTOR 1 (ARF1)	68.8404	52.5744	75.0788	65.4979
AT1G23550	SIMILAR TO RCD ONE 2 (SRO2)	5.56166	1.69203	6.31913	4.52428
AT1G23560	OBP32pep%2C putative (DUF220)	7.78341	4.75786	10.3805	7.64059
AT1G23710	hypothetical protein (DUF1645)	13.9634	7.05968	14.5295	11.8509
AT1G23720	Proline-rich extensin-like family protein	1.01243	5.81202	1.70568	2.84338
AT1G23750	Nucleic acid-binding%2C OB-fold-like protein	5.49629	18.0997	8.64163	10.7459
AT1G23760	(JP630)	12.8545	10.2905	0.189347	7.77811
AT1G23780	F-box family protein	36.6744	27.1893	37.4877	33.7838
AT1G23790	dicer-like protein (DUF936)	2.31895	3.38696	1.15453	2.28682
AT1G23800	ALDEHYDE DEHYDROGENASE 2B7 (ALDH2B7)	26.079	7.24429	35.9658	23.0964
AT1G23820	SPERMIDINE SYNTHASE 1 (SPDS1)	24.4349	34.9131	24.1614	27.8365
AT1G23830	transmembrane protein	4.69727	5.47433	3.76557	4.64572
AT1G23840	transmembrane protein	1.3933	1.83639	0.339022	1.18957
AT1G23850	transmembrane protein	4.40137	11.821	2.02462	6.08231
AT1G23860	RS-CONTAINING ZINC FINGER PROTEIN 21 (RSZ21)	23.7138	24.3087	16.9368	21.6531
AT1G23870	TREHALOSE-PHOSPHATASE/SYNTHASE 9 (TPS9)	18.2555	20.5994	23.3358	20.7302
AT1G23880	NHL domain-containing protein	1.54182	1.63251	2.52867	1.901
AT1G23890	NHL domain-containing protein	10.479	8.45191	7.88092	8.93728
AT1G23900	GAMMA-ADAPTIN 1 (GAMMA-ADAPTIN 1)	11.8177	11.2233	13.7162	12.2524
AT1G23950	hypothetical protein (DUF626)	18.0601	12.4448	18.3547	16.2865
AT1G23960	hypothetical protein (DUF626)	27.123	25.1625	28.3713	26.8856
AT1G23970	hypothetical protein (DUF626)	6.05393	4.42334	6.15808	5.54512
AT1G23980	RING/U-box superfamily protein	2.66341	3.51246	2.1906	2.78882
AT1G24040	Acyl-CoA N-acyltransferases (NAT) superfamily protein	3.51807	3.50368	2.71532	3.24569
AT1G24050	RNA-processing%2C Lsm domain-containing protein	37.0079	35.5808	38.7307	37.1065
AT1G24095	Putative thiol-disulfide oxidoreductase DCC	15.0434	10.8343	18.4558	14.7778
AT1G24100	UDP-GLUCOSYL TRANSFERASE 74B1 (UGT74B1)	32.0117	32.5439	41.9009	35.4855
AT1G24120	ARG1-LIKE 1 (ARL1)	5.9199	6.14977	5.51932	5.863
AT1G24130	Transducin/WD40 repeat-like superfamily protein	1.07698	1.94644	1.22243	1.41528
AT1G24140	Matrixin family protein	1.41416	0.973065	1.74181	1.37635
AT1G24150	FORMIN HOMOLOGUE 4 (FH4)	5.98301	5.4953	8.98764	6.82198
AT1G24160	triadin	6.66598	8.16873	5.82751	6.88741
AT1G24170	(LGT9)	17.5909	12.503	19.3978	16.4973
AT1G24180	IAA-CONJUGATE-RESISTANT 4 (IAR4)	41.2171	35.6649	53.3694	43.4172
AT1G24190	SIN3-LIKE 3 (SNL3)	13.6275	14.5977	15.6044	14.6099
AT1G24210	Paired amphipathic helix (PAH2) superfamily protein	1.063	0.927437	1.11321	1.03455
AT1G24240	Ribosomal protein L19 family protein	6.22805	6.36243	4.87776	5.82275
AT1G24265	bZIP transcription factor%2C putative (DUF1664)	1.29151	1.37757	1.43249	1.36719
AT1G24267	bZIP transcription factor%2C putative (DUF1664)	13.8353	11.6613	18.4001	14.6322
AT1G24280	GLUCOSE-6-PHOSPHATE DEHYDROGENASE 3 (G6PD3)	5.43194	5.9419	6.05828	5.81071
AT1G24290	AAA-type ATPase family protein	2.31542	2.9136	1.08992	2.10631
AT1G24300	GYF domain-containing protein	12.2742	12.1528	14.0837	12.8369
AT1G24310	NUP54	12.4476	13.1256	15.1541	13.5758
AT1G24320	Six-hairpin glycosidases superfamily protein	4.91268	7.7747	0.441158	4.37618
AT1G24340	EMBRYO DEFECTIVE 2421 (emb2421)	4.66743	4.94846	4.70574	4.77388
AT1G24350	Acid phosphatase/vanadium-dependent haloperoxidase-related protein	9.09376	7.21848	10.5634	8.95855
AT1G24360	NAD(P)-binding Rossmann-fold superfamily protein	30.9687	33.1635	32.2217	32.118
AT1G24430	HXXXD-type acyl-transferase family protein	2.56442	2.41248	1.27133	2.08274
AT1G24440	RING/U-box superfamily protein	7.4023	5.19855	6.77347	6.4581
AT1G24450	NUCLEAR FUSION DEFECTIVE 2 (NFD2)	13.0932	12.7647	8.90938	11.5891
AT1G24460	TGN-LOCALIZED SYP41 INTERACTING PROTEIN (TNO1)	14.8627	13.344	18.397	15.5346
AT1G24490	ALBINA 4 (ALB4)	6.04958	6.75604	8.42309	7.07624
AT1G24510	TCP-1/cpn60 chaperonin family protein	66.8833	73.9439	76.2543	72.3605
AT1G24530	Transducin/WD40 repeat-like superfamily protein	12.219	9.2101	8.33457	9.92121
AT1G24560	paramyosin	19.1179	18.3037	21.6625	19.6947
AT1G24575	DEAD-box ATP-dependent RNA helicase-like protein	4.08945	0.218298	0.0412603	1.44967
AT1G24580	RING/U-box superfamily protein	3.35224	1.00113	1.57685	1.97674
AT1G24600	hypothetical protein	7.42851	5.95619	4.53123	5.97198
AT1G24610	Rubisco methyltransferase family protein	8.27355	9.19825	8.00648	8.49276
AT1G24625	ZINC FINGER PROTEIN 7 (ZFP7)	9.94099	10.6349	10.4918	10.3559
AT1G24706	(THO2)	7.4876	6.9698	8.38207	7.61316
AT1G24764	MICROTUBULE-ASSOCIATED PROTEINS 70-2 (MAP70-2)	13.4859	17.6868	14.8769	15.3499
AT1G24793	LIPID X C1 (LPXC1)	8.44497	6.29065	5.16931	6.63498
AT1G24800	F-box family protein	26.0161	24.095	23.1906	24.4339
AT1G24807	Glutamine amidotransferase type 1 family protein	1.28761	1.54613	2.01115	1.61496
AT1G24880	LIPID X C2 (LPXC2)	6.4671	6.2142	4.47638	5.71922
AT1G24881	F-box family protein	26.4687	23.7972	22.8347	24.3669
AT1G24909	Glutamine amidotransferase type 1 family protein	1.52953	1.38586	2.64532	1.85357
AT1G24996	hypothetical protein	82.967	102.962	68.649	84.8594
AT1G25054	LIPID X C3 (LPXC3)	6.35708	6.12986	4.75353	5.74683
AT1G25055	F-box family protein	26.3252	25.0752	23.1497	24.85
AT1G25083	Glutamine amidotransferase type 1 family protein	1.73463	1.76055	2.46887	1.98802
AT1G25097	hypothetical protein	2.97862	3.6357	2.20058	2.9383
AT1G25098		29.2366	33.9737	27.622	30.2775
AT1G25145	LIPID X C4 (LPXC4)	8.67971	5.86201	5.50412	6.68195
AT1G25150	F-box family protein	26.7584	25.4998	24.2203	25.4928
AT1G25155	Glutamine amidotransferase type 1 family protein	1.65985	1.51579	2.14873	1.77479
AT1G25175		50.1961	58.5135	41.4723	50.0606
AT1G25210	LIPID X C5 (LPXC5)	7.76844	5.76082	4.65083	6.06003
AT1G25211	F-box family protein	26.5978	24.3981	22.536	24.5106
AT1G25220	ANTHRANILATE SYNTHASE BETA SUBUNIT 1 (ASB1)	13.1081	12.4694	20.5361	15.3712
AT1G25230	Calcineurin-like metallo-phosphoesterase superfamily protein	1.81474	3.13747	1.17844	2.04355
AT1G25260	Ribosomal protein L10 family protein	46.6982	55.3608	50.4069	50.822
AT1G25275	thionin-like protein	797.876	401.33	931.274	710.16
AT1G25280	TUBBY LIKE PROTEIN 10 (TLP10)	30.1256	34.0176	34.9811	33.0414
AT1G25290	RHOMBOID-LIKE PROTEIN 10 (RBL10)	1.99453	2.52497	1.18871	1.90274
AT1G25320	Leucine-rich repeat protein kinase family protein	19.5149	46.4052	11.8948	25.9383
AT1G25350	OVULE ABORTION 9 (OVA9)	15.4521	17.3003	18.927	17.2265
AT1G25360	Pentatricopeptide repeat (PPR) superfamily protein	1.24977	1.35409	1.24294	1.28227
AT1G25370	hypothetical protein (DUF1639)	9.1363	6.83181	9.68777	8.55196
AT1G25375	Metallo-hydrolase/oxidoreductase superfamily protein	4.44164	4.58014	4.23859	4.42012
AT1G25380	NAD+ TRANSPORTER 2 (NDT2)	9.16477	9.86925	9.01827	9.35076
AT1G25390	LEAF RUST 10 DISEASE-RESISTANCE LOCUS RECEPTOR- LIKE PROTEIN KINASE-LIKE 4; LRK10L4	7.50229	5.84778	6.09477	6.48162
AT1G25400	transmembrane protein	21.2527	6.85905	21.9681	16.6933
AT1G25420	IST1-LIKE 2; ISTL2	13.0033	13.0619	12.594	12.8864
AT1G25440	B-box type zinc finger protein with CCT domain-containing protein	2.91351	0.30837	0.629473	1.28378
AT1G25450	3-KETOACYL-COA SYNTHASE 5 (KCS5)	2.79331	4.39729	0.873749	2.68812
AT1G25460	NAD(P)-binding Rossmann-fold superfamily protein	3.35181	5.98252	1.85824	3.73085
AT1G25480	aluminum activated malate transporter family protein	4.01577	4.22605	3.24685	3.82956
AT1G25490	ROOTS CURL IN NPA (RCN1)	39.8897	40.1325	41.094	40.3721
AT1G25500	Plasma-membrane choline transporter family protein	3.67804	3.8308	3.09525	3.5347
AT1G25510	Eukaryotic aspartyl protease family protein	14.6709	28.715	7.9873	17.1244
AT1G25520	Uncharacterized protein family (UPF0016)	3.70624	3.67978	3.87652	3.75418
AT1G25530	Transmembrane amino acid transporter family protein	10.2949	30.4771	2.53121	14.4344
AT1G25540	PHYTOCHROME AND FLOWERING TIME 1 (PFT1)	10.9414	9.24773	11.0031	10.3974
AT1G25550	myb-like transcription factor family protein	42.3937	25.5438	41.3688	36.4354
AT1G25560	TEMPRANILLO 1 (TEM1)	32.6865	35.0965	29.5806	32.4545
AT1G25570	Di-glucose binding protein with Leucine-rich repeat domain-containing protein	19.9422	18.4024	24.9072	21.0839
AT1G25580	SUPPRESSOR OF GAMMA RADIATION 1 (SOG1)	7.97779	10.856	7.8853	8.90638
AT1G25682	CWC16A	9.61796	8.85885	10.7132	9.73
AT1G25988	coiled-coil protein%2C putative (DUF572)	1.1088	1.07711	1.25543	1.14711
AT1G26090	P-loop containing nucleoside triphosphate hydrolases superfamily protein	2.115	2.69535	1.72773	2.17936
AT1G26100	Cytochrome b561/ferric reductase transmembrane protein family	1.62221	2.31615	1.08311	1.67382
AT1G26110	DECAPPING 5 (DCP5)	78.4417	74.6745	85.9984	79.7049
AT1G26120	ISOPRENYLCYSTEINE METHYLESTERASE-LIKE 1 (ICME-LIKE1)	4.14036	3.58621	3.6721	3.79955
AT1G26130	ATPase E1-E2 type family protein / haloacid dehalogenase-like hydrolase family protein	2.27863	2.64463	1.91648	2.27992
AT1G26150	PROLINE-RICH EXTENSIN-LIKE RECEPTOR KINASE 10 (PERK10)	18.1889	18.5619	11.6292	16.1266
AT1G26160	Metal-dependent phosphohydrolase	6.19131	6.2733	5.99263	6.15241
AT1G26170	ARM repeat superfamily protein	5.66046	5.20286	5.80652	5.55661
AT1G26180	membrane protein	2.61154	3.41168	2.44018	2.82114
AT1G26190	Phosphoribulokinase / Uridine kinase family	6.4829	9.18767	8.82765	8.16607
AT1G26260	CRYPTOCHROME-INTERACTING BASIC-HELIX-LOOP-HELIX 5 (CIB5)	4.1295	7.602	5.02493	5.58548
AT1G26270	Phosphatidylinositol 3- and 4-kinase family protein	46.5121	84.0301	49.432	59.9914
AT1G26290	hypothetical protein	2.05044	3.73122	5.23402	3.67189
AT1G26300	BSD domain-containing protein	8.01528	6.36114	7.64052	7.33898
AT1G26330	DNA binding protein	1.74409	1.77845	1.31414	1.61223
AT1G26340	CYTOCHROME B5 ISOFORM A (CB5-A)	15.6123	13.3492	18.6997	15.8871
AT1G26370	RNA helicase family protein	8.87488	9.69126	9.74542	9.43718
AT1G26380	FAD-binding Berberine family protein	2.99199	0.454712	7.00367	3.48346
AT1G26390	FAD-binding Berberine family protein	0.969541	0.043603	3.23061	1.41458
AT1G26440	UREIDE PERMEASE 5 (UPS5)	11.7983	16.9974	11.0882	13.2946
AT1G26450	Carbohydrate-binding X8 domain superfamily protein	2.21843	3.32231	0.0924005	1.87771
AT1G26460	Tetratricopeptide repeat (TPR)-like superfamily protein	19.4986	21.0153	23.4172	21.3104
AT1G26470	SNRK2-SUBSTRATE 1; SNS1	19.9552	20.1889	23.4383	21.1941
AT1G26500	Pentatricopeptide repeat (PPR) superfamily protein	1.24151	0.871015	1.03181	1.04811
AT1G26520	Cobalamin biosynthesis CobW-like protein	3.19701	3.86243	3.8614	3.64028
AT1G26540	Agenet domain-containing protein	3.47552	1.68632	2.32229	2.49471
AT1G26550	FKBP-like peptidyl-prolyl cis-trans isomerase family protein	36.697	32.8288	46.1189	38.5482
AT1G26580	ELM2 domain protein	50.206	58.9159	47.1217	52.0812
AT1G26620	T-box transcription factor%2C putative (DUF863)	11.2354	10.3232	12.2515	11.27
AT1G26630	FUMONISIN B1-RESISTANT12 (FBR12)	393.284	356.383	433.409	394.359
AT1G26640	IPK; ISOPENTENYL PHOSPHATE KINASE	6.63958	8.42995	5.28146	6.78367
AT1G26650	Son of sevenless protein	7.69177	8.99279	5.63808	7.44088
AT1G26660	Prefoldin chaperone subunit family protein	3.52325	3.68711	4.14107	3.78381
AT1G26665	Mediator complex%2C subunit Med10	24.3455	30.6931	16.5209	23.8531
AT1G26670	(VTI1B)	23.8736	20.1908	24.1686	22.7443
AT1G26690	emp24/gp25L/p24 family/GOLD family protein	10.0322	8.60628	11.449	10.0292
AT1G26720	transmembrane protein	0.973961	1.5073	3.78907	2.09011
AT1G26730	EXS (ERD1/XPR1/SYG1) family protein	21.1509	36.2131	20.7524	26.0388
AT1G26740	Ribosomal L32p protein family	12.5121	11.4148	13.3729	12.4332
AT1G26750	hypothetical protein	11.0749	13.1117	12.3989	12.1951
AT1G26760	SET DOMAIN PROTEIN 35 (SDG35)	2.48653	4.87314	1.65727	3.00565
AT1G26770	EXPANSIN A10 (EXPA10)	20.525	27.996	32.6008	27.0406
AT1G26800	RING/U-box superfamily protein	7.67411	5.78108	7.79805	7.08442
AT1G26810	GALACTOSYLTRANSFERASE1 (GALT1)	1.38322	1.53421	1.08218	1.3332
AT1G26820	RIBONUCLEASE 3 (RNS3)	3.76419	1.69934	3.29654	2.92002
AT1G26830	CULLIN 3 (CUL3)	36.0862	35.8225	42.3137	38.0741
AT1G26840	ORIGIN RECOGNITION COMPLEX PROTEIN 6 (ORC6)	1.93393	1.90898	2.28566	2.04286
AT1G26850	S-adenosyl-L-methionine-dependent methyltransferases superfamily protein	81.5523	67.7169	85.397	78.222
AT1G26870	FEZ (FEZ)	2.83538	1.59669	1.97869	2.13692
AT1G26880	Ribosomal protein L34e superfamily protein	72.7	82.4078	83.4039	79.5039
AT1G26900	Pentatricopeptide repeat (PPR) superfamily protein	3.22954	4.23043	4.16529	3.87509
AT1G26910	RIBOSOMAL PROTEIN L10 B (RPL10B)	17.8843	20.8419	27.436	22.0541
AT1G26920	zinc finger CCHC domain protein	21.0165	14.6811	29.8813	21.8596
AT1G26930	Galactose oxidase/kelch repeat superfamily protein	58.0154	72.7397	79.0959	69.9503
AT1G26940	Cyclophilin-like peptidyl-prolyl cis-trans isomerase family protein	3.89102	5.05377	3.9877	4.31083
AT1G26945	KIDARI (KDR)	2.46841	9.75594	0.497647	4.24067
AT1G26960	HOMEOBOX PROTEIN 23 (AtHB23)	1.09973	2.7237	1.96681	1.93008
AT1G27000	GRIP/coiled-coil protein%2C putative (DUF1664)	30.1858	27.2284	37.0001	31.4714
AT1G27020	plant/protein	3.03963	0.706042	2.09704	1.94757
AT1G27050	homeobox leucine zipper protein	15.8875	15.6639	18.5617	16.7044
AT1G27060	Regulator of chromosome condensation (RCC1) family protein	1.59279	2.20699	1.41687	1.73888
AT1G27070	5'-AMP-activated protein kinase-like protein	4.91683	4.50345	3.69577	4.37202
AT1G27090	glycine-rich protein	60.4893	67.2965	62.888	63.5579
AT1G27100	Actin cross-linking protein	13.801	7.31121	12.2259	11.1127
AT1G27120	Galactosyltransferase family protein	1.41903	1.48802	1.00546	1.30417
AT1G27130	GLUTATHIONE S-TRANSFERASE TAU 13 (GSTU13)	37.9312	34.0672	32.3437	34.7807
AT1G27140	GLUTATHIONE S-TRANSFERASE TAU 14 (GSTU14)	1.90484	10.7925	2.53378	5.07705
AT1G27150	Tetratricopeptide repeat (TPR)-like superfamily protein	8.6172	7.14425	8.74651	8.16932
AT1G27170	transmembrane receptors / ATP binding protein	1.33037	1.4804	1.32407	1.37828
AT1G27190	Leucine-rich repeat protein kinase family protein	26.6863	34.0591	28.0314	29.5922
AT1G27200	glycosyltransferase family protein (DUF23)	10.6286	9.27911	8.7111	9.53962
AT1G27210	ARM repeat superfamily protein	8.04369	8.70774	7.08388	7.94511
AT1G27290	transmembrane protein	39.7977	32.4856	36.2491	36.1774
AT1G27300	transmembrane protein	44.4912	41.2522	49.8966	45.2133
AT1G27310	NUCLEAR TRANSPORT FACTOR 2A (NTF2A)	54.6675	49.0795	57.5243	53.7571
AT1G27320	HISTIDINE KINASE 3 (HK3)	21.1993	20.8179	20.736	20.9177
AT1G27330	Ribosome associated membrane protein RAMP4	33.9477	36.1563	38.3101	36.138
AT1G27340	LEAF CURLING RESPONSIVENESS (LCR)	21.897	21.2522	16.56	19.9031
AT1G27350	Ribosome associated membrane protein RAMP4	29.7001	31.0624	34.5882	31.7835
AT1G27360	SQUAMOSA PROMOTER-LIKE 11 (SPL11)	1.82029	1.45873	1.74791	1.67564
AT1G27370	SQUAMOSA PROMOTER BINDING PROTEIN-LIKE 10 (SPL10)	2.93079	2.14679	3.0574	2.71166
AT1G27385	phosphoribosylformylglycinamidine synthase	3.55583	3.27018	4.25728	3.69443
AT1G27390	TRANSLOCASE OUTER MEMBRANE 20-2 (TOM20-2)	33.9308	32.3964	35.3447	33.8906
AT1G27400	Ribosomal protein L22p/L17e family protein	86.5887	103.739	101.887	97.4048
AT1G27410	DNA repair metallo-beta-lactamase family protein	3.94654	3.61404	1.54928	3.03662
AT1G27420	Galactose oxidase/kelch repeat superfamily protein	3.00873	3.81912	1.59794	2.8086
AT1G27430	GYF domain-containing protein	13.3762	12.904	15.163	13.8144
AT1G27435	hypothetical protein	15.8297	16.6704	16.8342	16.4447
AT1G27440	(GUT2)	4.44492	4.00354	4.86007	4.43618
AT1G27450	ADENINE PHOSPHORIBOSYL TRANSFERASE 1 (APT1)	47.012	47.8998	54.7946	49.9022
AT1G27460	NO POLLEN GERMINATION RELATED 1 (NPGR1)	4.73962	4.93199	4.19581	4.62248
AT1G27470	transducin family protein / WD-40 repeat family protein	13.0017	15.6098	14.2438	14.2851
AT1G27500	Tetratricopeptide repeat (TPR)-like superfamily protein	5.89483	9.7541	7.1864	7.61178
AT1G27510	EXECUTER 2 (EX2)	10.9278	9.53953	9.25268	9.90668
AT1G27520	MANNOSIDASE 5; MNS5	9.41989	10.5409	8.96277	9.6412
AT1G27530	ubiquitin-fold modifier-conjugating enzyme	33.1452	29.1028	32.0898	31.4459
AT1G27540	F-box protein (DUF295)	16.7336	15.3354	11.559	14.5427
AT1G27565	hypothetical protein	5.84376	7.18274	7.15124	6.72591
AT1G27580	F-box protein (DUF295)	12.8583	9.83264	7.36772	10.0196
AT1G27590		10.0644	12.1983	10.4395	10.9007
AT1G27595	TANG1	7.31953	8.47422	7.03509	7.60961
AT1G27600	IRREGULAR XYLEM 9-LIKE (IRX9-L)	10.5923	11.6938	8.62627	10.3041
AT1G27620	HXXXD-type acyl-transferase family protein	5.22501	4.59424	2.44096	4.08674
AT1G27630	CYCLIN T 1;3 (CYCT1;3)	8.78643	8.64277	9.82471	9.08463
AT1G27650	(ATU2AF35A)	59.3189	63.9481	51.6356	58.3009
AT1G27680	ADPGLC-PPASE LARGE SUBUNIT (APL2)	5.28285	5.23928	6.3486	5.62357
AT1G27690	lipase%2C putative (DUF620)	22.4148	13.7316	15.7584	17.3016
AT1G27695	TGD5; TRIGALACTOSYLDIACYLGLYCEROL 5	5.32311	5.49281	4.5263	5.11407
AT1G27700	Syntaxin/t-SNARE family protein	3.94385	3.50977	3.79609	3.74991
AT1G27730	SALT TOLERANCE ZINC FINGER (STZ)	64.6697	19.1315	30.3048	38.0354
AT1G27750	nucleic acid binding protein	11.7955	12.6888	12.3631	12.2825
AT1G27752	Ubiquitin system component Cue protein	9.97082	11.2342	10.0718	10.4256
AT1G27760	SALT-TOLERANCE 32 (SAT32)	27.6582	22.1416	34.0162	27.9387
AT1G27770	AUTOINHIBITED CA2+-ATPASE 1 (ACA1)	23.6239	16.9561	23.397	21.3257
AT1G27840	(ATCSA-1)	6.7362	6.27168	4.95838	5.98875
AT1G27850	RUN/FYVE domain protein	8.16012	9.08552	6.40613	7.88392
AT1G27880	DEAD/DEAH box RNA helicase family protein	1.33764	2.04457	1.53958	1.64059
AT1G27890	Polynucleotidyl transferase%2C ribonuclease H-like superfamily protein	3.71262	1.7421	1.58881	2.34784
AT1G27900	RNA helicase family protein	6.41375	5.54753	7.19262	6.38463
AT1G27910	PLANT U-BOX 45 (PUB45)	2.6913	3.58956	3.08775	3.12287
AT1G27920	MICROTUBULE-ASSOCIATED PROTEIN 65-8 (MAP65-8)	5.04103	8.05024	3.2044	5.43189
AT1G27921		1.36963	2.42314	0.819917	1.53756
AT1G27930	glucuronoxylan 4-O-methyltransferase-like protein (DUF579)	12.9283	15.0375	15.1027	14.3562
AT1G27950	GLYCOSYLPHOSPHATIDYLINOSITOL-ANCHORED LIPID PROTEIN TRANSFER 1 (LTPG1)	58.2871	74.1373	33.6134	55.3459
AT1G27960	EVOLUTIONARILY CONSERVED C-TERMINAL REGION 9 (ECT9)	3.7254	4.17672	3.46367	3.7886
AT1G27970	NUCLEAR TRANSPORT FACTOR 2B (NTF2B)	45.4946	32.1499	52.4921	43.3789
AT1G27980	DIHYDROSPHINGOSINE PHOSPHATE LYASE (DPL1)	10.2154	8.07033	10.9549	9.74688
AT1G28050	B-BOX DOMAIN PROTEIN 13; BBX13	11.2946	11.9467	10.5137	11.2517
AT1G28060	Pre-mRNA-splicing factor 3	17.6969	20.5999	21.3975	19.8981
AT1G28070	ATP-dependent RNA helicase	2.63639	2.98905	3.5288	3.05141
AT1G28090	Polynucleotide adenylyltransferase family protein	4.32265	4.98668	5.39642	4.90192
AT1G28110	SERINE CARBOXYPEPTIDASE-LIKE 45 (SCPL45)	12.2717	15.0392	8.95867	12.0899
AT1G28120	ubiquitin thioesterase otubain-like protein	9.63792	9.44106	11.0044	10.0278
AT1G28130	(GH3.17)	58.2906	64.587	37.2315	53.3697
AT1G28140	integral membrane family protein	4.38645	6.1326	4.68153	5.06686
AT1G28150	hypothetical protein	4.79893	6.21689	4.16553	5.06045
AT1G28190	hypothetical protein	19.821	21.5685	25.3288	22.2395
AT1G28200	FH INTERACTING PROTEIN 1 (FIP1)	16.1954	16.1639	18.4629	16.9407
AT1G28210	(ATJ1)	0.968235	1.0655	1.3155	1.11641
AT1G28230	PURINE PERMEASE 1 (PUP1)	1.6143	1.85051	0.160547	1.20845
AT1G28240	strawberry notch protein (DUF616)	9.64836	7.45439	10.5518	9.21818
AT1G28250	transmembrane protein	10.1817	9.59604	10.3004	10.026
AT1G28260	Telomerase activating protein Est1	17.9391	21.4228	13.4259	17.5959
AT1G28280	VQ motif-containing protein	55.1656	35.3436	48.822	46.4438
AT1G28290	ARABINOGALACTAN PROTEIN 31 (AGP31)	201.718	170.262	141.268	171.083
AT1G28310	Dof-type zinc finger DNA-binding family protein	3.50431	7.44392	1.98782	4.31202
AT1G28320	(DEG15)	9.16115	10.5289	9.28181	9.65728
AT1G28330	DORMANCY-ASSOCIATED PROTEIN-LIKE 1 (DYL1)	66.2167	121.786	43.8527	77.2852
AT1G28340	RECEPTOR LIKE PROTEIN 4 (RLP4)	13.9514	11.4978	14.3866	13.2786
AT1G28350	Nucleotidylyl transferase superfamily protein	5.71706	7.01916	6.98979	6.57534
AT1G28360	ERF DOMAIN PROTEIN 12 (ERF12)	11.1575	12.5853	7.83584	10.5262
AT1G28370	ERF DOMAIN PROTEIN 11 (ERF11)	10.3108	11.3885	7.72216	9.80713
AT1G28380	NECROTIC SPOTTED LESIONS 1 (NSL1)	16.7569	11.8915	17.8657	15.5047
AT1G28390	Protein kinase superfamily protein	9.67287	12.5044	7.46937	9.88222
AT1G28395	hypothetical protein	5.29676	5.82809	5.66041	5.59509
AT1G28400	GATA zinc finger protein	241.584	170.743	111.444	174.59
AT1G28410	myosin heavy chain-like protein	4.87138	6.89009	4.34378	5.36842
AT1G28420	HOMEOBOX-1 (HB-1)	10.4337	10.7544	12.1498	11.1126
AT1G28440	HAESA-LIKE 1 (HSL1)	10.3564	14.9629	8.44748	11.2556
AT1G28480	(GRX480)	15.559	14.6313	28.071	19.4204
AT1G28490	SYNTAXIN OF PLANTS 61 (SYP61)	8.79035	9.27954	8.72316	8.93102
AT1G28510	Optic atrophy 3 protein (OPA3)	5.64454	5.36834	8.02725	6.34671
AT1G28520	VASCULAR PLANT ONE ZINC FINGER PROTEIN (VOZ1)	34.1092	23.5947	40.8831	32.8623
AT1G28530	ANGULATA 10; ANU10	1.21328	1.73752	1.21909	1.38996
AT1G28540	transmembrane protein	6.33865	6.68246	5.31737	6.11283
AT1G28560	SHOOT REDIFFERENTIATION DEFECTIVE 2 (SRD2)	1.68714	1.50807	1.74006	1.64509
AT1G28580	GDSL-like Lipase/Acylhydrolase superfamily protein	67.2893	67.3744	67.6788	67.4475
AT1G28600	GDSL-like Lipase/Acylhydrolase superfamily protein	7.12873	4.03787	7.99432	6.38697
AT1G28620		1.20323	6.14221	3.7257	3.69038
AT1G28670	(ARAB-1)	2.13816	1.49729	2.5897	2.07505
AT1G28680	HXXXD-type acyl-transferase family protein	4.37251	6.02951	9.65687	6.6863
AT1G28690	Tetratricopeptide repeat (TPR)-like superfamily protein	1.2712	1.46564	1.47061	1.40248
AT1G28710	Nucleotide-diphospho-sugar transferase family protein	1.67136	1.41485	1.32061	1.46894
AT1G28760	INNER NUCLEAR MEMBRANE PROTEIN A; NEMP_A	8.23885	7.96118	5.61483	7.27162
AT1G28815	hypothetical protein	2.07262	2.28754	1.68924	2.01647
AT1G28960	NUDIX HYDROLASE HOMOLOG 15 (NUDX15)	16.2792	14.1792	16.0114	15.4899
AT1G29020	Calcium-binding EF-hand family protein	12.4903	17.7196	0.21136	10.1404
AT1G29030	Apoptosis inhibitory protein 5 (API5)	4.45666	4.74619	5.28866	4.8305
AT1G29040	50S ribosomal protein L34	7.05259	8.12234	6.07524	7.08339
AT1G29050	TRICHOME BIREFRINGENCE-LIKE 38 (TBL38)	2.63842	2.7869	2.75178	2.7257
AT1G29060	Target SNARE coiled-coil domain protein	5.26056	3.73181	5.62089	4.87109
AT1G29070	Ribosomal protein L34	6.34625	5.68952	4.53469	5.52349
AT1G29100	Heavy metal transport/detoxification superfamily protein	4.63358	4.96227	0.341552	3.31247
AT1G29120	UP9	5.54045	4.86945	6.53174	5.64722
AT1G29150	NON-ATPASE SUBUNIT 9 (ATS9)	79.904	72.61	83.3193	78.6111
AT1G29160	Dof-type zinc finger DNA-binding family protein	27.1713	21.926	31.6677	26.9217
AT1G29170	(WAVE2)	2.86453	3.76898	2.46943	3.03431
AT1G29195	phosphatidylinositol 4-phosphate 5-kinase MSS4-like protein	5.42975	5.58908	9.0012	6.67334
AT1G29220	transcriptional regulator family protein	13.3096	10.8103	12.4559	12.1919
AT1G29240	transcription initiation factor TFIID subunit%2C putative (DUF688)	3.61902	4.60531	3.3416	3.85531
AT1G29250	Alba DNA/RNA-binding protein	21.4944	25.4383	26.0597	24.3308
AT1G29260	PEROXIN 7 (PEX7)	15.3971	14.9323	13.0588	14.4627
AT1G29280	WRKY DNA-BINDING PROTEIN 65 (WRKY65)	20.3948	34.6448	38.1515	31.0637
AT1G29290	B-cell lymphoma 6 protein	46.5239	24.1634	53.3163	41.3345
AT1G29300	UNFERTILIZED EMBRYO SAC 1 (UNE1)	16.7505	19.3049	17.9205	17.992
AT1G29310	SecY protein transport family protein	26.9637	20.3581	35.7352	27.6857
AT1G29320	Transducin/WD40 repeat-like superfamily protein	9.68	10.3903	11.9773	10.6826
AT1G29330	ENDOPLASMIC RETICULUM RETENTION DEFECTIVE 2 (ERD2)	5.70608	7.67916	6.89403	6.75976
AT1G29340	PLANT U-BOX 17 (PUB17)	25.916	20.0553	28.4644	24.8119
AT1G29350	RNA polymerase II degradation factor-like protein (DUF1296)	27.2004	30.2894	25.006	27.4986
AT1G29357		6.01782	7.31698	4.62771	5.9875
AT1G29370	RNA polymerase II degradation factor-like protein (DUF1296)	27.0944	30.106	25.0119	27.4041
AT1G29390	COLD REGULATED 314 THYLAKOID MEMBRANE 2 (COR314-TM2)	4.92089	4.06645	3.66166	4.21634
AT1G29400	MEI2-LIKE PROTEIN 5 (ML5)	27.7136	26.8039	24.803	26.4402
AT1G29410	PHOSPHORIBOSYLANTHRANILATE ISOMERASE 3 (PAI3)	5.51027	5.13444	5.70397	5.44956
AT1G29418	transmembrane protein	32.2438	68.8051	69.4476	56.8322
AT1G29465	transmembrane protein	2.8384	4.40524	4.26752	3.83706
AT1G29470	S-adenosyl-L-methionine-dependent methyltransferases superfamily protein	50.48	41.9361	48.8052	47.0738
AT1G29530	hypothetical protein	3.18457	3.72199	3.00369	3.30342
AT1G29550	Eukaryotic initiation factor 4E protein	5.2942	3.7058	3.45567	4.15189
AT1G29560	Zinc finger C-x8-C-x5-C-x3-H type family protein	1.92507	1.12394	0.764941	1.27132
AT1G29630	5'-3' exonuclease family protein	3.94556	4.87273	4.16265	4.32698
AT1G29640	senescence regulator (Protein of unknown function%2C DUF584)	11.3504	12.063	14.8909	12.7681
AT1G29690	CONSTITUTIVELY ACTIVATED CELL DEATH 1 (CAD1)	11.2583	9.12856	11.8811	10.756
AT1G29700	Metallo-hydrolase/oxidoreductase superfamily protein	1.94713	1.80545	2.28127	2.01128
AT1G29710	Tetratricopeptide repeat (TPR)-like superfamily protein	4.5015	4.80182	3.87453	4.39262
AT1G29750	RECEPTOR-LIKE KINASE IN FLOWERS 1 (RKF1)	3.89423	3.33221	4.43933	3.88859
AT1G29760	SEIPIN2	18.8013	12.3565	18.6606	16.6061
AT1G29770	Haloacid dehalogenase-like hydrolase (HAD) superfamily protein	2.75267	2.85919	2.63806	2.74998
AT1G29780	Haloacid dehalogenase-like hydrolase (HAD) superfamily protein	2.4349	2.67783	2.0158	2.37618
AT1G29785		2.84044	3.88803	2.29548	3.00798
AT1G29790	S-adenosyl-L-methionine-dependent methyltransferases superfamily protein	11.5016	13.1493	9.08888	11.2466
AT1G29800	RING/FYVE/PHD-type zinc finger family protein	6.81875	4.64317	6.45108	5.971
AT1G29810	Transcriptional coactivator/pterin dehydratase	2.80134	3.82018	2.35551	2.99234
AT1G29820	Magnesium transporter CorA-like family protein	6.56257	6.42484	5.78395	6.25712
AT1G29830	Magnesium transporter CorA-like family protein	0.7963	1.3221	1.28541	1.1346
AT1G29840	alpha/beta-Hydrolases superfamily protein	2.08273	2.36714	1.8981	2.11599
AT1G29850	double-stranded DNA-binding family protein	18.3067	16.8887	22.6695	19.2883
AT1G29860	WRKY DNA-BINDING PROTEIN 71 (WRKY71)	1.65812	1.4384	1.54432	1.54695
AT1G29880	glycyl-tRNA synthetase / glycine-tRNA ligase	43.7799	42.312	53.5336	46.5418
AT1G29890	REDUCED WALL ACETYLATION 4 (RWA4)	4.59452	4.29652	4.33494	4.40866
AT1G29900	CARBAMOYL PHOSPHATE SYNTHETASE B (CARB)	45.0755	52.8787	48.0941	48.6828
AT1G29910	CHLOROPHYLL A/B BINDING PROTEIN 3 (CAB3)	4.42579	0.391897	2.45292	2.42354
AT1G29920	CHLOROPHYLL A/B-BINDING PROTEIN 2 (CAB2)	24.2248	0.627528	6.76314	10.5385
AT1G29930	CHLOROPHYLL A/B BINDING PROTEIN 1 (CAB1)	247.324	6.7889	66.6353	106.916
AT1G29940	NUCLEAR RNA POLYMERASE A2 (NRPA2)	13.8314	14.6336	17.8472	15.4374
AT1G29950	SACL3	3.12735	4.44645	3.16934	3.58105
AT1G29960	Peptidase S24/S26A/S26B/S26C family protein	3.40287	3.66508	2.77887	3.28227
AT1G29965	Ribosomal protein L18ae/LX family protein	1.26708	1.41343	1.83478	1.5051
AT1G29970	60S RIBOSOMAL PROTEIN L18A-1 (RPL18AA)	10.83	9.76828	9.37406	9.9908
AT1G29980	choice-of-anchor C domain protein%2C putative (Protein of unknown function%2C DUF642)	20.6641	40.9642	17.0609	26.2297
AT1G29990	PREFOLDIN 6 (PFD6)	19.6053	18.9169	19.3418	19.288
AT1G30000	ALPHA-MANNOSIDASE 3 (MNS3)	15.161	15.3461	16.514	15.6737
AT1G30010	NUCLEAR MATURASE 1 (NMAT1)	2.63628	3.12112	2.67649	2.8113
AT1G30040	GIBBERELLIN 2-OXIDASE (GA2OX2)	20.7167	33.6562	23.9178	26.0969
AT1G30070	SGS domain-containing protein	42.2372	46.7438	63.7865	50.9225
AT1G30080	Glycosyl hydrolase superfamily protein	2.24711	4.82441	1.28198	2.7845
AT1G30090	Galactose oxidase/kelch repeat superfamily protein	29.2816	23.957	32.319	28.5192
AT1G30100	NINE-CIS-EPOXYCAROTENOID DIOXYGENASE 5 (NCED5)	4.66549	12.5059	3.28312	6.81819
AT1G30110	NUDIX HYDROLASE HOMOLOG 25 (NUDX25)	4.47846	7.62821	5.89576	6.00081
AT1G30120	PYRUVATE DEHYDROGENASE E1 BETA (PDH-E1 BETA)	19.1881	19.1497	17.9917	18.7765
AT1G30130	DUF1365 family protein	10.705	10.3825	11.1552	10.7476
AT1G30135	JASMONATE-ZIM-DOMAIN PROTEIN 8 (JAZ8)	3.04688	1.72654	6.00993	3.59445
AT1G30160	hypothetical protein (DUF295)	2.77405	2.26631	3.95137	2.99725
AT1G30190	cotton fiber protein	1.13454	1.54295	0.899197	1.19223
AT1G30200	F-box family protein	15.4886	18.9053	16.6883	17.0274
AT1G30210	TEOSINTE BRANCHED 1, CYCLOIDEA, AND PCF FAMILY 24 (TCP24)	5.91882	6.37235	7.5226	6.60459
AT1G30230	EUKARYOTIC ELONGATION FACTOR 1B BETA 1 (EEF-1BB1)	260.019	318.855	283.626	287.5
AT1G30240	proline-%2C glutamic acid/leucine-rich protein	3.80261	4.30369	3.82687	3.97773
AT1G30260	galactosyltransferase family protein	1.12049	1.97282	0.990063	1.36112
AT1G30270	CBL-INTERACTING PROTEIN KINASE 23 (CIPK23)	32.2918	25.3805	31.5162	29.7295
AT1G30290	Tetratricopeptide repeat (TPR)-like superfamily protein	4.23619	4.49611	3.13396	3.95542
AT1G30300	Metallo-hydrolase/oxidoreductase superfamily protein	4.57199	4.82437	3.13141	4.17592
AT1G30320	Remorin family protein	13.3421	12.009	10.2345	11.8618
AT1G30330	AUXIN RESPONSE FACTOR 6 (ARF6)	19.3851	18.2397	22.5267	20.0505
AT1G30360	EARLY-RESPONSIVE TO DEHYDRATION 4 (ERD4)	17.7128	22.7134	13.8782	18.1015
AT1G30380	PHOTOSYSTEM I SUBUNIT K (PSAK)	7.29775	0.658277	1.70317	3.21973
AT1G30400	ATP-BINDING CASSETTE C1 (ABCC1)	20.13	17.216	25.5556	20.9672
AT1G30410	ATP-BINDING CASSETTE C12 (ABCC12)	1.22102	1.53582	1.12702	1.29462
AT1G30420	ATP-BINDING CASSETTE C11 (ABCC11)	16.2045	17.4835	17.8654	17.1845
AT1G30440	Phototropic-responsive NPH3 family protein	31.3952	35.0453	21.9923	29.4776
AT1G30450	CATION-CHLORIDE CO-TRANSPORTER 1 (CCC1)	9.90017	7.40661	10.2066	9.17112
AT1G30455	cyclin/Brf1-like TBP-binding domain-containing protein	1.24748	1.00649	1.62113	1.2917
AT1G30460	CLEAVAGE AND POLYADENYLATION SPECIFICITY FACTOR 30 (CPSF30)	6.6554	6.56176	7.34326	6.85347
AT1G30470	SIT4 phosphatase-associated family protein	9.04902	8.23278	10.1707	9.15082
AT1G30475	hypothetical protein	2.26061	2.33044	3.12614	2.5724
AT1G30480	DNA-DAMAGE-REPAIR/TOLERATION PROTEIN 111 (DRT111)	8.79196	9.81218	7.9406	8.84825
AT1G30490	PHAVOLUTA (PHV)	47.9626	38.5969	68.664	51.7412
AT1G30500	"NUCLEAR FACTOR Y, SUBUNIT A7" (NF-YA7)	3.97657	4.76032	4.38371	4.37353
AT1G30510	ROOT FNR 2 (RFNR2)	25.5317	28.1039	26.6939	26.7765
AT1G30540	Actin-like ATPase superfamily protein	2.65215	2.26846	2.96988	2.63016
AT1G30570	HERCULES RECEPTOR KINASE 2 (HERK2)	5.45991	5.95081	4.20387	5.20486
[truncated: 14,707 more rows]
