# Supplementary material for: The H3K27me3 epigenetic mark is crucial for callus cell identity and for the acquisition of new fate during root and shoot regeneration
Source: bioRxiv preprint, doi:10.1101/2022.05.12.491615, version 1 (2022-05-13)
Supplement: S2 [file 491615_file07.xlsx]

## Sheet: Leaves expressed genes
Supplementary Data 2 Col-0 Leaves expressed genes.
Columns C,D,E show mRNA levels (in RPKM:Reads Per Kilobase of transcripts per Million mappesd reads) of col-0 3 weeks old leaves in three biological replicates. Column F is the mean.
A gene was considerd expressed if mean_RPKM > 1
Gene.ID	Gene name	Leaves_RPKM_rep1	Leaves_RPKM_rep2	Leaves_RPKM_rep3	Leaves_mean_RPKM
AT1G01010	NAC DOMAIN CONTAINING PROTEIN 1 (NAC001)	1.78064	3.79061	4.90671	3.49265
AT1G01020	(ARV1)	3.76941	3.566	3.21572	3.51704
AT1G01030	NGATHA3 (NGA3)	4.96828	3.90034	0.582173	3.15026
AT1G01040	DICER-LIKE 1 (DCL1)	9.82705	8.18299	9.18109	9.06371
AT1G01046	MICRORNA838A (MIR838A)	6.68191	3.6306	5.36352	5.22534
AT1G01050	PYROPHOSPHORYLASE 1 (PPa1)	61.8266	65.4898	41.255	56.1905
AT1G01060	LATE ELONGATED HYPOCOTYL (LHY)	331.654	196.383	42.665	190.234
AT1G01070	nodulin MtN21 /EamA-like transporter family protein	5.62663	6.1495	5.51271	5.76294
AT1G01080	RNA-binding (RRM/RBD/RNP motifs) family protein	73.8321	60.0849	41.1084	58.3418
AT1G01090	PYRUVATE DEHYDROGENASE E1 ALPHA (PDH-E1 ALPHA)	147.272	144.185	77.6653	123.041
AT1G01100	60S acidic ribosomal protein family	119.615	139.767	74.1536	111.178
AT1G01110	IQ-DOMAIN 18 (IQD18)	1.0976	1.15694	0.854578	1.03637
AT1G01120	3-KETOACYL-COA SYNTHASE 1 (KCS1)	146.132	141.701	90.6693	126.167
AT1G01130	CBL-interacting Serine/Threonine-kinase	2.23317	2.71486	1.30994	2.08599
AT1G01140	CBL-INTERACTING PROTEIN KINASE 9 (CIPK9)	125.565	146.506	129.262	133.777
AT1G01160	GRF1-INTERACTING FACTOR 2 (GIF2)	13.2924	13.8935	14.157	13.781
AT1G01170	ozone-responsive stress-like protein (DUF1138)	53.2225	56.9108	58.4321	56.1885
AT1G01180	S-adenosyl-L-methionine-dependent methyltransferases superfamily protein	19.3756	15.9765	22.3696	19.2406
AT1G01190	"CYTOCHROME P450, FAMILY 78, SUBFAMILY A, POLYPEPTIDE 8" (CYP78A8)	5.21983	6.12514	2.33843	4.56113
AT1G01210	DNA-directed RNA polymerase%2C subunit M%2C archaeal	7.9837	10.9796	5.6007	8.18799
AT1G01220	L-FUCOKINASE/GDP-L-FUCOSE PYROPHOSPHORYLASE (FKGP)	10.8618	7.60634	6.91669	8.4616
AT1G01225	NC domain-containing protein-like protein	2.07481	1.43972	1.10686	1.54046
AT1G01230	ORMDL family protein	10.3589	8.65445	14.9795	11.331
AT1G01240	transmembrane protein	6.43214	7.27055	27.0746	13.5924
AT1G01260	BHLH013; BHLH13; JAM2; JASMONATE ASSOCIATED MYC2 LIKE 2	14.0956	15.8065	21.3625	17.0882
AT1G01290	COFACTOR OF NITRATE REDUCTASE AND XANTHINE DEHYDROGENASE 3 (CNX3)	6.44916	5.79442	6.03947	6.09435
AT1G01300	Eukaryotic aspartyl protease family protein	26.2103	21.4488	46.6666	31.4419
AT1G01320	REC1; REDUCED CHLOROPLAST COVERAGE	118.492	129.417	65.5618	104.49
AT1G01340	CYCLIC NUCLEOTIDE GATED CHANNEL 10 (CNGC10)	8.82427	9.4663	9.61665	9.30241
AT1G01350	Zinc finger (CCCH-type/C3HC4-type RING finger) family protein	12.1032	12.5727	12.7203	12.4654
AT1G01360	REGULATORY COMPONENT OF ABA RECEPTOR 1 (RCAR1)	30.9375	25.5399	16.5515	24.343
AT1G01390	UDP-Glycosyltransferase superfamily protein	15.7505	13.0923	3.82075	10.8879
AT1G01420	UDP-GLUCOSYL TRANSFERASE 72B3 (UGT72B3)	6.46558	4.97177	2.33331	4.59022
AT1G01430	TRICHOME BIREFRINGENCE-LIKE 25 (TBL25)	40.4409	40.9191	25.9025	35.7542
AT1G01440	hypothetical protein (DUF3133)	11.2264	12.2935	12.6562	12.0587
AT1G01448		2.87666	2.39304	2.85456	2.70809
AT1G01470	LATE EMBRYOGENESIS ABUNDANT 14 (LEA14)	468.652	604.284	737.861	603.599
AT1G01480	1-AMINO-CYCLOPROPANE-1-CARBOXYLATE SYNTHASE 2 (ACS2)	1.3481	1.96086	3.74463	2.3512
AT1G01490	Heavy metal transport/detoxification superfamily protein	45.7952	44.2133	34.6005	41.5364
AT1G01500	Erythronate-4-phosphate dehydrogenase family protein	2.15426	3.21706	6.04406	3.80513
AT1G01510	ANGUSTIFOLIA (AN)	13.122	12.2938	10.6413	12.019
AT1G01540	Protein kinase superfamily protein	63.1748	49.901	45.6499	52.9086
AT1G01550	BYPASS 1 (BPS1)	164.11	171.54	180.264	171.971
AT1G01560	MAP KINASE 11 (MPK11)	34.7443	77.9811	176.757	96.494
AT1G01570	transferring glycosyl group transferase (DUF604)	1.49783	1.8659	2.14244	1.83539
AT1G01580	FERRIC REDUCTION OXIDASE 2 (FRO2)	1.10783	2.08359	0.532748	1.24139
AT1G01610	GLYCEROL-3-PHOSPHATE ACYLTRANSFERASE 4 (GPAT4)	28.2812	28.7852	16.9097	24.6587
AT1G01620	PLASMA MEMBRANE INTRINSIC PROTEIN 1C (PIP1C)	307.457	343.726	157.703	269.629
AT1G01630	Sec14p-like phosphatidylinositol transfer family protein	24.8773	23.3635	19.9126	22.7178
AT1G01640	BTB/POZ domain-containing protein	1.75387	1.62598	3.21634	2.19873
AT1G01650	SIGNAL PEPTIDE PEPTIDASE-LIKE 4 (SPPL4)	17.0329	22.5076	20.6965	20.079
AT1G01680	PLANT U-BOX 54 (PUB54)	2.36211	11.1367	30.2571	14.5853
AT1G01710	acyl-CoA thioesterase II	6.09592	7.12754	6.11315	6.44554
AT1G01720	(ATAF1)	111.297	193.123	102.621	135.681
AT1G01725	adenylosuccinate synthetase	6.54735	5.98274	4.60723	5.71244
AT1G01730	hypothetical protein	15.8957	13.9676	21.973	17.2788
AT1G01740	kinase with tetratricopeptide repeat domain-containing protein	3.37492	2.98834	1.6806	2.68129
AT1G01760	denosine deaminases acting on tRNA	1.83411	1.60658	1.31385	1.58485
AT1G01770	propionyl-CoA carboxylase	5.52322	4.55883	6.03537	5.37247
AT1G01780	PLIM2B (PLIM2b)	5.34339	4.55475	6.29265	5.39693
AT1G01790	K+ EFFLUX ANTIPORTER 1 (KEA1)	81.0091	74.0009	33.0611	62.6904
AT1G01800	NAD(P)-binding Rossmann-fold superfamily protein	42.226	51.9748	44.2908	46.1639
AT1G01820	PEROXIN 11C (PEX11C)	22.9725	17.7248	27.8289	22.8421
AT1G01830	ARM repeat superfamily protein	9.9637	9.56284	5.74227	8.42294
AT1G01860	PALEFACE 1 (PFC1)	4.66175	3.48739	2.77634	3.64183
AT1G01900	(SBTI1.1)	4.97817	4.01945	2.31165	3.76975
AT1G01910	ATGET3A; GET3A; GUIDED ENTRY OF TAIL-ANCHORED PROTEIN 3A	16.9653	14.7219	19.2834	16.9902
AT1G01920	SET domain-containing protein	3.54379	2.73763	3.18644	3.15596
AT1G01930	zinc finger protein-like protein	5.13795	6.54228	5.95395	5.87806
AT1G01940	Cyclophilin-like peptidyl-prolyl cis-trans isomerase family protein	2.92576	3.37813	3.0987	3.1342
AT1G01950	ARMADILLO REPEAT KINESIN 2 (ARK2)	15.0637	17.2154	9.16792	13.8157
AT1G01960	EMBRYO SAC DEVELOPMENT ARREST 10 (EDA10)	16.8491	13.1851	19.6152	16.5498
AT1G01970	Tetratricopeptide repeat (TPR)-like superfamily protein	24.9312	19.7194	13.9273	19.526
AT1G01990	hypothetical protein	24.7301	23.3257	18.8818	22.3125
AT1G02000	UDP-D-GLUCURONATE 4-EPIMERASE 2 (GAE2)	13.9791	14.8863	8.27716	12.3808
AT1G02010	SECRETORY 1A (SEC1A)	3.64781	2.58334	1.60584	2.61233
AT1G02020	nitroreductase family protein	14.6344	15.5876	11.1834	13.8018
AT1G02050	LESS ADHESIVE POLLEN 6 (LAP6)	2.70005	3.21626	3.49757	3.13796
AT1G02060	Tetratricopeptide repeat (TPR)-like superfamily protein	2.59155	2.09047	3.71159	2.79787
AT1G02080	transcription regulator	12.9617	12.3034	14.1112	13.1254
AT1G02090	FUSCA 5 (FUS5)	11.5598	16.8874	9.41726	12.6215
AT1G02100	SUPPRESSOR OF BRI1 (SBI1)	11.7251	12.8938	13.1469	12.5886
AT1G02110	bZIP domain class transcription factor (DUF630 and DUF632)	12.3578	11.7147	7.80722	10.6266
AT1G02120	VASCULAR ASSOCIATED DEATH1 (VAD1)	22.4534	20.9516	26.0916	23.1655
AT1G02130	RAS 5 (RA-5)	17.1752	18.4359	16.2879	17.2997
AT1G02140	MAGO NASHI (MAGO)	75.297	79.088	62.0942	72.1597
AT1G02145	HOMOLOG OF ASPARAGINE-LINKED GLYCOSYLATION 12 (ALG12)	3.86624	3.69743	4.23478	3.93282
AT1G02150	Tetratricopeptide repeat (TPR)-like superfamily protein	69.1394	56.3335	44.9275	56.8002
AT1G02160	Cox19 family protein (CHCH motif)	16.1868	12.5256	15.7467	14.8197
AT1G02170	METACASPASE 1 (MC1)	34.8412	39.0718	50.1674	41.3602
AT1G02180	ferredoxin-like protein	4.85749	4.68037	2.49685	4.01157
AT1G02205	ECERIFERUM 1 (CER1)	15.3248	32.1439	5.87073	17.7798
AT1G02220	NAC DOMAIN CONTAINING PROTEIN 3 (NAC003)	3.43347	6.48816	3.59859	4.50674
AT1G02260	Divalent ion symporter	8.6927	4.98555	10.9466	8.20827
AT1G02270	Calcium-binding endonuclease/exonuclease/phosphatase family	17.2738	23.6012	32.6085	24.4945
AT1G02280	TRANSLOCON AT THE OUTER ENVELOPE MEMBRANE OF CHLOROPLASTS 33 (TOC33)	54.422	47.2181	28.9706	43.5369
AT1G02290	hypothetical protein	2.63402	2.79479	2.85945	2.76275
AT1G02300	Cysteine proteinases superfamily protein	2.55929	1.61174	6.61874	3.59659
AT1G02305	ATCATHB2	35.3849	33.4757	48.7318	39.1974
AT1G02330	integrator complex subunit-like protein	12.3538	13.3834	13.6956	13.1443
AT1G02335	GERMIN-LIKE PROTEIN SUBFAMILY 2 MEMBER 2 PRECURSOR (GL22)	13.3009	15.8423	6.22569	11.7896
AT1G02340	LONG HYPOCOTYL IN FAR-RED (HFR1)	2.73804	1.5311	6.04625	3.43846
AT1G02360	Chitinase family protein	20.857	5.74044	18.9361	15.1778
AT1G02370	Tetratricopeptide repeat (TPR)-like superfamily protein	1.32063	1.59786	1.5788	1.4991
AT1G02380	transmembrane protein	2.76867	6.66929	2.98706	4.14167
AT1G02390	GLYCEROL-3-PHOSPHATE ACYLTRANSFERASE 2 (GPAT2)	19.7278	27.2986	15.3759	20.8008
AT1G02400	GIBBERELLIN 2-OXIDASE 6 (GA2OX6)	40.5145	40.534	55.1726	45.407
AT1G02410	cytochrome c oxidase assembly protein CtaG / Cox11 family	16.4722	16.4129	13.2018	15.3623
AT1G02420	Pentatricopeptide repeat (PPR) superfamily protein	1.89885	1.49922	2.08945	1.82917
AT1G02430	ADP-RIBOSYLATION FACTOR D1B (ARFD1B)	1.43727	0.989185	0.852444	1.09297
AT1G02450	NIM1-INTERACTING 1 (NIMIN1)	0.403684	2.85549	6.78371	3.34763
AT1G02475	Polyketide cyclase/dehydrase and lipid transport superfamily protein	48.1434	47.5255	39.4881	45.0523
AT1G02500	S-ADENOSYLMETHIONINE SYNTHETASE 1 (SAM1)	222.936	219.049	223.793	221.926
AT1G02560	NUCLEAR ENCODED CLP PROTEASE 5 (CLPP5)	147.617	134.534	131.489	137.88
AT1G02610	RING/FYVE/PHD zinc finger superfamily protein	4.7337	6.57822	5.52925	5.61372
AT1G02640	BETA-XYLOSIDASE 2 (BXL2)	10.2509	10.0134	5.77876	8.68102
AT1G02660	alpha/beta-Hydrolases superfamily protein	99.8532	115.283	113.539	109.559
AT1G02680	TBP-ASSOCIATED FACTOR 13 (TAF13)	5.8074	6.14144	6.62168	6.19017
AT1G02690	IMPORTIN ALPHA ISOFORM 6 (IMPA-6)	2.07817	1.96065	0.958547	1.66579
AT1G02700	GATA transcription factor-like protein	2.81206	3.95048	2.27554	3.01269
AT1G02710	glycine-rich protein	21.2639	34.578	14.7312	23.5244
AT1G02720	GALACTURONOSYLTRANSFERASE 5 (GATL5)	7.92591	5.68005	3.7479	5.78462
AT1G02730	CELLULOSE SYNTHASE-LIKE D5 (CSLD5)	7.28867	6.66395	2.90661	5.61974
AT1G02740	MORF RELATED GENE 2; MRG2	2.94188	4.82303	7.54839	5.10443
AT1G02750	Drought-responsive family protein	10.032	11.0424	8.55146	9.87527
AT1G02780	EMBRYO DEFECTIVE 2386 (emb2386)	253.913	303.746	183.758	247.139
AT1G02810	Plant invertase/pectin methylesterase inhibitor superfamily	1.18263	1.35656	0.501014	1.0134
AT1G02816	pectinesterase (Protein of unknown function%2C DUF538)	23.9171	28.8829	18.767	23.8557
AT1G02820	LATE EMBRYOGENESIS ABUNDANT 3 (LEA3)	70.1867	296.902	9.54268	125.544
AT1G02840	SERINE/ARGININE-RICH PROTEIN SPLICING FACTOR 34 (SR34)	24.8254	24.8287	24.3597	24.6713
AT1G02850	BETA GLUCOSIDASE 11 (BGLU11)	0.924833	1.95499	3.05604	1.97862
AT1G02860	NITROGEN LIMITATION ADAPTATION (NLA)	7.57521	6.69921	7.96111	7.41185
AT1G02870	nucleolar-like protein	7.35932	9.69647	6.82529	7.96036
AT1G02880	THIAMIN PYROPHOSPHOKINASE1 (TPK1)	15.0365	12.4945	8.34062	11.9572
AT1G02890	AAA-type ATPase family protein	17.7615	17.9847	19.2661	18.3374
AT1G02900	RAPID ALKALINIZATION FACTOR 1 (RALF1)	2.26314	2.45175	1.01203	1.90897
AT1G02910	LOW PSII ACCUMULATION1 (LPA1)	45.9797	42.9207	31.9673	40.2892
AT1G02920	GLUTATHIONE S-TRANSFERASE 7 (GSTF7)	58.4666	87.0236	429.882	191.791
AT1G02930	GLUTATHIONE S-TRANSFERASE 6 (GSTF6)	81.7591	137.07	672.445	297.091
AT1G02950	GLUTATHIONE S-TRANSFERASE F4 (GSTF4)	5.20783	7.03358	2.56211	4.93451
AT1G02960	kinetochore protein	5.55922	4.02597	6.11397	5.23306
AT1G02990	hypothetical protein	5.65042	5.43056	6.48061	5.85387
AT1G03000	PEROXIN 6 (PEX6)	7.16131	5.99775	7.26274	6.80727
AT1G03020	Thioredoxin superfamily protein	14.96	16.8899	6.188	12.6793
AT1G03030	P-loop containing nucleoside triphosphate hydrolases superfamily protein	6.05376	6.92658	6.26624	6.41552
AT1G03040	basic helix-loop-helix (bHLH) DNA-binding superfamily protein	17.1579	15.8675	15.6351	16.2202
AT1G03055	beta-carotene isomerase D27-like protein	8.82457	11.0808	3.60896	7.83812
AT1G03060	SPIRRIG (SPI)	9.71123	8.5826	10.0954	9.46308
AT1G03080	NETWORKED 1D (NET1D)	19.6054	22.5924	17.1473	19.7817
AT1G03090	(MCCA)	7.33469	5.59657	10.8413	7.92419
AT1G03110	TRNA MODIFICATION 82 (TRM82)	2.39712	3.08761	1.38429	2.28968
AT1G03130	PHOTOSYSTEM I SUBUNIT D-2 (PSAD-2)	1409.88	1863.01	1224.34	1499.08
AT1G03140	splicing factor Prp18 family protein	25.2513	29.8289	38.5782	31.2195
AT1G03150	Acyl-CoA N-acyltransferases (NAT) superfamily protein	4.105	4.17709	5.2312	4.50443
AT1G03160	FZO-LIKE (FZL)	17.5016	15.9491	12.8306	15.4271
AT1G03190	ULTRAVIOLET HYPERSENSITIVE 6 (UVH6)	2.19153	2.0593	2.04871	2.09985
AT1G03200	hypothetical protein	1.43679	1.83122	2.75037	2.00613
AT1G03210	Phenazine biosynthesis PhzC/PhzF protein	10.4157	11.4309	19.7015	13.8494
AT1G03220	Eukaryotic aspartyl protease family protein	99.1808	102.115	91.5934	97.6296
AT1G03230	Eukaryotic aspartyl protease family protein	22.3433	20.6814	29.0333	24.0193
AT1G03250	R3H domain protein	11.2371	13.5518	9.68915	11.4927
AT1G03260	SNARE associated Golgi protein family	3.68705	2.99041	3.36592	3.3478
AT1G03280	Transcription factor TFIIE%2C alpha subunit	9.97537	8.9986	10.6243	9.86608
AT1G03290	ELKS/Rab6-interacting/CAST family protein	10.3863	16.1033	24.0621	16.8505
AT1G03300	DOMAIN OF UNKNOWN FUNCTION 724 1 (ATDUF1)	2.67586	5.46799	2.67262	3.60549
AT1G03310	DEBRANCHING ENZYME 1 (DBE1)	16.3734	12.7713	9.40537	12.85
AT1G03330	LSM2; SM-LIKE 2	16.9216	14.1286	15.3323	15.4608
AT1G03340	hypothetical protein	1.34078	1.4119	2.01132	1.588
AT1G03350	BSD domain-containing protein	26.4907	25.5362	28.3463	26.7911
AT1G03360	RIBOSOMAL RNA PROCESSING 4 (RRP4)	3.33622	6.82879	2.80981	4.32494
AT1G03365	RING/U-box superfamily protein	7.50874	7.92355	6.70967	7.38065
AT1G03370	C2 calcium/lipid-binding and GRAM domain containing protein	41.2571	41.5138	38.7082	40.493
AT1G03380	HOMOLOG OF YEAST AUTOPHAGY 18 (ATG18) G (ATG18G)	12.926	11.5716	16.0003	13.4993
AT1G03400	2-oxoglutarate (2OG) and Fe(II)-dependent oxygenase superfamily protein	39.7261	53.6644	39.9599	44.4501
AT1G03410	(2A6)	13.2461	11.672	6.39973	10.4393
AT1G03430	HISTIDINE-CONTAINING PHOSPHOTRANSFER FACTOR 5 (AHP5)	6.88626	8.30934	12.7491	9.31489
AT1G03440	Leucine-rich repeat (LRR) family protein	19.9571	15.3533	8.7877	14.6994
AT1G03457	RNA-binding (RRM/RBD/RNP motifs) family protein	1.66837	2.21392	1.07174	1.65134
AT1G03470	NETWORKED 3A (NET3A)	1.86096	2.34123	3.25526	2.48582
AT1G03475	LESION INITIATION 2 (LIN2)	108.809	91.8696	86.2413	95.64
AT1G03495	HXXXD-type acyl-transferase family protein	4.81993	10.1282	4.87599	6.60803
AT1G03510	Tetratricopeptide repeat (TPR)-like superfamily protein	1.89048	1.16517	1.43443	1.49669
AT1G03520	Core-2/I-branching beta-1%2C6-N-acetylglucosaminyltransferase family protein	6.90896	6.67085	8.36459	7.3148
AT1G03530	NUCLEAR ASSEMBLY FACTOR 1 (NAF1)	3.64491	5.53616	2.72621	3.96909
AT1G03540	Pentatricopeptide repeat (PPR-like) superfamily protein	0.954723	1.11795	1.01115	1.02794
AT1G03550	SECRETORY CARRIER MEMBRANE PROTEIN 4 (SCAMP4)	1.66867	1.7173	2.98624	2.12407
AT1G03560	Pentatricopeptide repeat (PPR-like) superfamily protein	4.35817	3.68453	3.39174	3.81148
AT1G03590	Protein phosphatase 2C family protein	13.3555	13.2609	10.702	12.4395
AT1G03600	(PSB27)	689.617	779.957	489.252	652.942
AT1G03610	plant/protein (DUF789)	62.9457	73.8004	52.7212	63.1558
AT1G03630	PROTOCHLOROPHYLLIDE OXIDOREDUCTASE C (POR C)	129.756	140.416	90.9742	120.382
AT1G03650	Acyl-CoA N-acyltransferases (NAT) superfamily protein	2.67318	1.96102	3.39743	2.67721
AT1G03680	THIOREDOXIN M-TYPE 1 (THM1)	400.942	378.38	348.252	375.858
AT1G03687	DTW domain-containing protein	5.45405	4.8008	3.42049	4.55845
AT1G03730	pyrroline-5-carboxylate reductase	25.3224	18.5694	28.0103	23.9674
AT1G03740	Protein kinase superfamily protein	25.3617	13.3932	37.8081	25.521
AT1G03750	SWITCH 2 (SWI2)	1.89682	1.54493	3.22382	2.22186
AT1G03760	Prefoldin chaperone subunit family protein	1.6502	2.03712	3.70189	2.46307
AT1G03770	RING 1B (RING1B)	0.762475	1.10402	1.63097	1.16582
AT1G03800	ERF DOMAIN PROTEIN 10 (ERF10)	0.986417	1.07491	1.33725	1.13286
AT1G03820	E6-like protein	7.36441	7.52505	9.71825	8.20257
AT1G03830	guanylate-binding family protein	1.25884	0.818837	1.04058	1.03942
AT1G03850	GLUTAREDOXIN 13 (GRXS13)	0.852584	2.95899	9.61326	4.47494
AT1G03860	PROHIBITIN 2 (PHB2)	24.9906	25.7993	26.7011	25.8304
AT1G03870	FASCICLIN-LIKE ARABINOOGALACTAN 9 (FLA9)	182.873	123.884	101.4	136.052
AT1G03900	ATP-BINDING CASSETTE I18 (ABCI18)	47.5207	48.3731	61.6804	52.5247
AT1G03905	ATP-BINDING CASSETTE I19 (ABCI19)	1.83139	1.7331	0.672407	1.4123
AT1G03910	CACTIN; CTN	13.8169	14.2457	13.9255	13.996
AT1G03930	DUAL SPECIFICITY KINASE 1 (ADK1)	21.1501	13.4343	12.5775	15.7207
AT1G03940	HXXXD-type acyl-transferase family protein	4.01228	8.32281	3.86775	5.40095
AT1G03950	VACUOLAR PROTEIN SORTING-ASSOCIATED PROTEIN 2.3 (VPS2.3)	6.42039	6.67954	7.99822	7.03271
AT1G03960	Calcium-binding EF hand family protein	1.44214	1.05989	1.78529	1.42911
AT1G03970	G-BOX BINDING FACTOR 4 (GBF4)	16.5824	16.1843	22.969	18.5786
AT1G03990	Long-chain fatty alcohol dehydrogenase family protein	2.26014	2.56239	2.61641	2.47965
AT1G04000	hypothetical protein	19.4558	26.3523	9.12432	18.3108
AT1G04010	PHOSPHOLIPID STEROL ACYL TRANSFERASE 1 (PSAT1)	1.95793	2.46135	1.60996	2.00975
AT1G04020	BREAST CANCER ASSOCIATED RING 1 (BARD1)	2.33908	1.90193	1.61393	1.95164
AT1G04030	eisosome protein	1.52266	1.33074	1.49901	1.4508
AT1G04040	HAD superfamily%2C subfamily IIIB acid phosphatase	113.216	59.7249	40.32	71.0871
AT1G04070	TRANSLOCASE OF OUTER MEMBRANE 22-I (TOM22-I)	6.60231	7.44158	5.88591	6.64326
AT1G04080	(PRP39)	24.1713	26.7799	22.5934	24.5149
AT1G04100	INDOLEACETIC ACID-INDUCED PROTEIN 10 (IAA10)	3.45422	2.79832	2.83525	3.02926
AT1G04120	ATP-BINDING CASSETTE C5 (ABCC5)	18.0891	24.7107	13.6065	18.8021
AT1G04130	TETRATRICOPEPTIDE REPEAT 2 (TPR2)	5.23381	12.163	3.28271	6.89318
AT1G04140	Transducin family protein / WD-40 repeat family protein	23.2429	20.4246	26.4457	23.3711
AT1G04160	MYOSIN XI B (XIB)	1.15019	1.41451	0.709338	1.09135
AT1G04170	EUKARYOTIC TRANSLATION INITIATION FACTOR 2 GAMMA SUBUNIT (EIF2 GAMMA)	31.5793	34.0038	20.2816	28.6216
AT1G04190	TETRATRICOPEPTIDE REPEAT 3 (TPR3)	9.0997	9.83578	5.60731	8.18093
AT1G04200	dyggve-melchior-clausen syndrome protein	10.7088	12.9516	19.3601	14.3402
AT1G04210	Leucine-rich repeat protein kinase family protein	21.0274	26.0059	15.7352	20.9228
AT1G04220	3-KETOACYL-COA SYNTHASE 2 (KCS2)	2.07221	4.63582	0.806993	2.50501
AT1G04230	rRNA-processing EFG1-like protein (DUF2361)	5.19002	5.21308	5.66548	5.35619
AT1G04240	SHORT HYPOCOTYL 2 (SHY2)	46.4859	51.7001	16.8219	38.336
AT1G04250	AUXIN RESISTANT 3 (AXR3)	25.028	38.243	3.83539	22.3688
AT1G04260	CAMV MOVEMENT PROTEIN INTERACTING PROTEIN 7 (MPI7)	13.8124	16.4417	14.132	14.7954
AT1G04270	CYTOSOLIC RIBOSOMAL PROTEIN S15 (RPS15)	171.35	182.326	105.495	153.057
AT1G04280	P-loop containing nucleoside triphosphate hydrolases superfamily protein	7.28202	6.1869	10.4908	7.98659
AT1G04290	Thioesterase superfamily protein	3.24025	3.71678	2.10482	3.02062
AT1G04300	MUSE13; TRAF1B; TUMOR NECROSIS FACTOR RECEPTOR-ASSOCIATED FACTOR 1B	21.1295	22.4486	26.7025	23.4269
AT1G04310	ETHYLENE RESPONSE SENSOR 2 (ERS2)	2.86449	1.89781	1.7889	2.18373
AT1G04340	HR-like lesion-inducing protein-like protein	10.3285	8.80239	8.55794	9.22963
AT1G04350	2-oxoglutarate (2OG) and Fe(II)-dependent oxygenase superfamily protein	79.333	77.1785	50.6056	69.0391
AT1G04360	ARABIDOPSIS TOXICOS EN LEVADURA 1; ATL1	3.14842	1.99657	1.99529	2.38009
AT1G04390	BTB/POZ domain-containing protein	2.2634	2.92321	2.69905	2.62855
AT1G04400	CRYPTOCHROME 2 (CRY2)	50.9804	45.6345	82.5766	59.7305
AT1G04410	CYTOSOLIC-NAD-DEPENDENT MALATE DEHYDROGENASE 1 (c-NAD-MDH1)	399.623	414.997	396.023	403.548
AT1G04420	NAD(P)-linked oxidoreductase superfamily protein	85.6818	75.3257	54.0821	71.6966
AT1G04430	S-adenosyl-L-methionine-dependent methyltransferases superfamily protein	76.2133	67.7458	69.9196	71.2929
AT1G04440	CASEIN KINASE LIKE 13 (CKL13)	25.2197	28.8346	41.1551	31.7364
AT1G04480	Ribosomal protein L14p/L23e family protein	74.3617	91.5926	50.9661	72.3068
AT1G04490	hypothetical protein (DUF3527)	1.87811	2.89785	2.95728	2.57775
AT1G04510	MOS4-ASSOCIATED COMPLEX 3A (MAC3A)	13.5565	12.6542	9.68787	11.9662
AT1G04520	PLASMODESMATA-LOCATED PROTEIN 2 (PDLP2)	15.0784	13.9456	2.00995	10.3447
AT1G04530	TETRATRICOPEPTIDE REPEAT 4 (TPR4)	80.9036	110.365	49.3045	80.1911
AT1G04540	Calcium-dependent lipid-binding (CaLB domain) family protein	4.47427	3.00539	1.14413	2.8746
AT1G04550	INDOLE-3-ACETIC ACID INDUCIBLE 12 (IAA12)	29.044	27.6991	11.9159	22.8864
AT1G04555	transmembrane protein	3.77581	3.29164	5.37464	4.14736
AT1G04590	PPR containing-like protein	6.11755	5.72806	3.74411	5.19658
AT1G04600	MYOSIN XI A (XIA)	0.312375	0.557832	2.50235	1.12418
AT1G04620	7-HYDROXYMETHYL CHLOROPHYLL A (HMCHL) REDUCTASE (HCAR)	11.5806	9.22147	9.53126	10.1111
AT1G04630	MATERNAL EFFECT EMBRYO ARREST 4 (MEE4)	16.7609	20.4066	15.23	17.4658
AT1G04635	EMBRYO DEFECTIVE 1687 (EMB1687)	1.12078	1.16318	1.13051	1.13816
AT1G04640	LIPOYLTRANSFERASE 2 (LIP2)	54.826	57.3353	39.5759	50.5791
AT1G04680	Pectin lyase-like superfamily protein	48.8242	46.6306	18.2804	37.9117
AT1G04690	POTASSIUM CHANNEL BETA SUBUNIT 1 (KAB1)	28.3268	31.1564	43.6445	34.3759
AT1G04710	PEROXISOMAL 3-KETOACYL-COA THIOLASE 4 (PKT4)	8.01557	9.32492	6.78078	8.04042
AT1G04750	VESICLE-ASSOCIATED MEMBRANE PROTEIN 721 (VAMP721)	22.9267	23.4978	33.936	26.7869
AT1G04770	SD!2; SULFUR DEFICIENCY INDUCED 2	33.6178	92.4243	7.42334	44.4885
AT1G04780	Ankyrin repeat family protein	28.5598	34.3637	43.9441	35.6225
AT1G04790	RING/U-box superfamily protein	8.88659	8.89794	9.27193	9.01882
AT1G04800	glycine-rich protein	178.768	152.907	67.1467	132.941
AT1G04810	26S proteasome regulatory complex%2C non-ATPase subcomplex%2C Rpn2/Psmd1 subunit	15.0008	12.8357	14.6378	14.1581
AT1G04820	TUBULIN ALPHA-4 CHAIN (TUA4)	113.771	97.9724	85.5409	99.0948
AT1G04830	Ypt/Rab-GAP domain of gyp1p superfamily protein	5.16512	4.74949	5.26235	5.05899
AT1G04850	ubiquitin-associated (UBA)/TS-N domain-containing protein	19.9329	22.4723	23.608	22.0044
AT1G04860	UBIQUITIN-SPECIFIC PROTEASE 2 (UBP2)	13.9912	14.5533	12.1136	13.5527
AT1G04870	PROTEIN ARGININE METHYLTRANSFERASE 10 (PRMT10)	7.61367	11.8536	6.86558	8.77763
AT1G04900	NADH dehydrogenase ubiquinone complex I%2C assembly factor-like protein (DUF185)	1.7773	1.53416	1.46025	1.59057
AT1G04910	O-fucosyltransferase family protein	7.41802	5.71461	8.78625	7.3063
AT1G04940	TRANSLOCON AT THE INNER ENVELOPE MEMBRANE OF CHLOROPLASTS 20-I (Tic20-I)	3.77961	4.02016	3.20241	3.6674
AT1G04945	HIT-type Zinc finger family protein	0.970007	1.18828	1.05328	1.07052
AT1G04950	TATA BOX ASSOCIATED FACTOR II 59 (TAFII59)	5.71075	5.61481	5.63461	5.65339
AT1G04960	golgin family A protein (DUF1664)	9.06411	9.67587	10.193	9.64431
AT1G04970	LBR-1	13.7865	12.7226	19.3724	15.2938
AT1G04980	PDI-LIKE 2-2 (PDIL2-2)	4.06048	7.49564	17.3499	9.63535
AT1G04985	triacylglycerol lipase-like protein	21.4141	23.0221	20.4497	21.6286
AT1G04990	Zinc finger C-x8-C-x5-C-x3-H type family protein	8.51544	7.79574	17.6961	11.3358
AT1G05000	PLANT AND FUNGI ATYPICAL DUAL-SPECI&#64257;CITY PHOSPHATASE 1 (PFA-DSP1)	4.84937	4.45004	3.85744	4.38562
AT1G05010	ETHYLENE-FORMING ENZYME (EFE)	206.136	160.528	337.727	234.797
AT1G05020	ENTH/ANTH/VHS superfamily protein	1.46259	1.14152	3.25777	1.95396
AT1G05030	Major facilitator superfamily protein	6.19649	4.87062	6.16616	5.74442
AT1G05055	GENERAL TRANSCRIPTION FACTOR II H2 (GTF2H2)	4.07599	3.30936	3.22614	3.53717
AT1G05060	coiled-coil protein	6.89266	7.67981	11.0108	8.52775
AT1G05070	transmembrane protein%2C putative (DUF1068)	15.8406	17.7731	11.4963	15.0367
AT1G05090	dentin sialophosphoprotein-like protein	5.89357	4.96676	7.27376	6.0447
AT1G05100	MITOGEN-ACTIVATED PROTEIN KINASE KINASE KINASE 18 (MAPKKK18)	1.71692	4.43121	1.91539	2.68784
AT1G05120	Helicase protein with RING/U-box domain-containing protein	3.77775	3.69003	5.46452	4.31077
AT1G05135		91.5201	49.3948	69.0289	69.9813
AT1G05140	Peptidase M50 family protein	66.8879	66.7919	39.1379	57.6059
AT1G05150	Calcium-binding tetratricopeptide family protein	15.6714	11.3108	12.01	12.9974
AT1G05160	"CYTOCHROME P450, FAMILY 88, SUBFAMILY A, POLYPEPTIDE 3" (CYP88A3)	3.91517	3.28635	3.20496	3.46883
AT1G05170	Galactosyltransferase family protein	7.3076	8.84799	3.3022	6.48593
AT1G05180	AUXIN RESISTANT 1 (AXR1)	9.05311	8.43813	12.2912	9.92748
AT1G05190	EMBRYO DEFECTIVE 2394 (emb2394)	443.688	398.426	286.21	376.108
AT1G05200	GLUTAMATE RECEPTOR 3.4 (GLR3.4)	20.6778	14.2193	13.9233	16.2735
AT1G05205	hexokinase-1 protein	7.65641	6.87011	8.37054	7.63235
AT1G05210	Transmembrane protein 97%2C Putative	1.19434	1.01118	1.66248	1.28933
AT1G05230	HOMEODOMAIN GLABROUS 2 (HDG2)	3.92651	4.5676	3.07619	3.85677
AT1G05270	TraB family protein	14.2179	13.2038	13.0152	13.479
AT1G05300	ZINC TRANSPORTER 5 PRECURSOR (ZIP5)	1.04792	0.699922	2.98961	1.57915
AT1G05310	Pectin lyase-like superfamily protein	2.74604	2.5791	1.28045	2.20186
AT1G05320	myosin heavy chain%2C embryonic smooth protein	7.49828	5.63969	4.49427	5.87741
AT1G05340	cysteine-rich TM module stress tolerance protein	16.8259	32.1411	43.2054	30.7241
AT1G05350	NAD(P)-binding Rossmann-fold superfamily protein	7.38327	7.20904	9.19121	7.92784
AT1G05360	KILLING ME SLOWLY 2 (KMS2)	3.07131	2.92612	2.75282	2.91675
AT1G05380	Acyl-CoA N-acyltransferase with RING/FYVE/PHD-type zinc finger protein	7.59363	7.8321	9.4097	8.27848
AT1G05385	LOW PSII ACCUMULATION 19 (LPA19)	38.1701	28.3658	15.8027	27.4462
AT1G05410	CDPK adapter%2C putative (DUF1423)	5.89515	6.15528	4.95646	5.66897
AT1G05430	hypothetical protein	16.3815	15.497	14.1074	15.3286
AT1G05460	SILENCING DEFECTIVE (SDE3)	3.45226	3.13139	2.3925	2.99205
AT1G05470	COTYLEDON VASCULAR PATTERN 2 (CVP2)	2.69621	2.24751	1.53243	2.15872
AT1G05500	(NTMC2T2.1)	10.5787	9.2695	9.0065	9.61822
AT1G05520	Sec23/Sec24 protein transport family protein	6.83045	6.18643	8.30609	7.10766
AT1G05540	hypothetical protein (DUF295)	9.99417	9.795	1.45511	7.08142
AT1G05560	UDP-GLUCOSYLTRANSFERASE 75B1 (UGT75B1)	3.1325	3.49197	1.75696	2.79381
AT1G05570	CALLOSE SYNTHASE 1 (CALS1)	5.31772	5.114	13.6694	8.0337
AT1G05575	transmembrane protein	72.2849	56.0332	134.779	87.6989
AT1G05590	BETA-HEXOSAMINIDASE 2 (HEXO2)	6.94271	5.15496	4.96714	5.68827
AT1G05600	EMBRYO DEFECTIVE 3101 (EMB3101)	3.20218	3.02109	3.05031	3.09119
AT1G05620	URIDINE-RIBOHYDROLASE 2 (URH2)	2.15285	1.97884	3.02	2.38389
AT1G05630	INOSITOL-POLYPHOSPHATE 5-PHOSPHATASE 13 (5PTASE13)	10.647	12.5272	8.63599	10.6034
AT1G05640	Ankyrin repeat family protein	1.14517	1.21254	1.77637	1.37803
AT1G05670	Pentatricopeptide repeat (PPR-like) superfamily protein	4.55117	3.64221	3.27324	3.82221
AT1G05675	UDP-Glycosyltransferase superfamily protein	43.0593	17.5286	28.8396	29.8092
AT1G05690	BTB AND TAZ DOMAIN PROTEIN 3 (bt3)	8.31706	6.0743	3.33871	5.91002
AT1G05710	basic helix-loop-helix (bHLH) DNA-binding superfamily protein	10.4801	10.4604	15.0424	11.9943
AT1G05720	selenoprotein family protein	6.02085	5.4794	10.1185	7.20624
AT1G05750	PIGMENT DEFECTIVE 247 (PDE247)	1.66988	1.33306	1.47222	1.49172
AT1G05780	Vacuolar ATPase assembly integral membrane protein VMA21-like domain-containing protein	1.49889	1.11524	3.41525	2.00979
AT1G05785	Got1/Sft2-like vescicle transport protein family	2.23475	2.10691	2.74942	2.36369
AT1G05790	lipase class 3 family protein	6.24903	4.88114	6.9973	6.04249
AT1G05805	basic helix-loop-helix (bHLH) DNA-binding superfamily protein	9.54518	6.43216	19.9865	11.9879
AT1G05810	RAB GTPASE HOMOLOG A5E (RABA5E)	16.5334	10.9567	11.9919	13.1607
AT1G05830	TRITHORAX-LIKE PROTEIN 2 (ATX2)	5.4305	4.29977	5.12239	4.95089
AT1G05840	Eukaryotic aspartyl protease family protein	10.4128	11.4029	18.2625	13.3594
AT1G05850	POM-POM1 (POM1)	499.625	405.81	216.739	374.058
AT1G05860	INO80 complex subunit D-like protein	5.02172	5.24381	4.40155	4.88903
AT1G05870	hypothetical protein (DUF1685)	22.7467	18.4587	4.45944	15.2216
AT1G05890	ARIADNE 5 (ARI5)	14.1993	10.2826	16.1743	13.552
AT1G05900	ENDONUCLEASE III 2 (NTH2)	11.2641	9.42784	4.76651	8.48617
AT1G05910	cell division cycle protein 48-related / CDC48-like protein	4.83315	4.57555	3.94144	4.45005
AT1G05940	CATIONIC AMINO ACID TRANSPORTER 9 (CAT9)	17.3935	16.5499	19.7189	17.8875
AT1G05960	ARM repeat superfamily protein	10.3345	7.25732	8.20953	8.60045
AT1G05970	RNA-binding (RRM/RBD/RNP motifs) family protein	6.25929	7.65621	7.6158	7.1771
AT1G06000	UGT89C1	13.2109	40.2786	11.6015	21.697
AT1G06010	basic leucine zipper/W2 domain protein	6.40935	6.9889	5.45291	6.28372
AT1G06040	SALT TOLERANCE (STO)	235.582	288.732	119.542	214.619
AT1G06050	ENHANCED DISEASE RESISTANCE-like protein (DUF1336)	5.95142	6.20607	6.57587	6.24445
AT1G06060	LisH and RanBPM domains containing protein	10.8305	11.1396	11.3943	11.1215
AT1G06070	Basic-leucine zipper (bZIP) transcription factor family protein	7.21522	6.98826	8.16938	7.45762
AT1G06110	SKP1/ASK-INTERACTING PROTEIN 16 (SKIP16)	19.754	15.9746	21.1228	18.9505
AT1G06130	GLYOXALASE 2-4 (GLX2-4)	13.3487	16.0302	23.6712	17.6834
AT1G06140	MITOCHONDRIAL EDITING FACTOR 3 (MEF3)	1.45422	0.99587	1.6735	1.37453
AT1G06190	RHO-N 1 (RHON1)	52.0177	49.3856	33.8651	45.0894
AT1G06200	Peptidase S24/S26A/S26B/S26C family protein	14.2375	14.9504	15.2896	14.8258
AT1G06210	ENTH/VHS/GAT family protein	16.8385	16.1929	12.5144	15.182
AT1G06220	MATERNAL EFFECT EMBRYO ARREST 5 (MEE5)	15.0414	17.2875	11.0359	14.4549
AT1G06230	GLOBAL TRANSCRIPTION FACTOR GROUP E4 (GTE4)	24.8943	27.4021	21.3465	24.5476
AT1G06240	diiron containing four-helix bundle family ferritin protein%2C putative (Protein of unknown function DUF455)	19.7888	17.0493	8.18361	15.0072
AT1G06250	alpha/beta-Hydrolases superfamily protein	2.33041	1.98576	2.31302	2.20973
AT1G06270	Pentatricopeptide repeat (PPR) superfamily protein	1.56648	2.07137	1.5669	1.73491
AT1G06290	ACYL-COA OXIDASE 3 (ACX3)	19.4739	21.3491	29.7957	23.5395
AT1G06360	Fatty acid desaturase family protein	9.14225	2.70536	2.14254	4.66339
AT1G06370		2.24448	2.35503	2.27026	2.28992
AT1G06380	Ribosomal protein L1p/L10e family	8.7846	10.9089	5.24251	8.31202
AT1G06390	GSK3/SHAGGY-LIKE PROTEIN KINASE 1 (GSK1)	30.2023	26.1888	20.469	25.62
AT1G06400	(ARA-2)	46.6699	63.4448	69.4143	59.843
AT1G06410	TREHALOSE-PHOSPHATASE/SYNTHASE 7 (TPS7)	91.16	126.923	125.713	114.599
AT1G06430	FTSH PROTEASE 8 (ftsh8)	159.519	276.433	101.677	179.21
AT1G06440	Ubiquitin carboxyl-terminal hydrolase family protein	1.19733	1.2985	1.82607	1.44063
AT1G06450	Polynucleotidyl transferase%2C ribonuclease H-like superfamily protein	2.63759	2.93473	4.11203	3.22812
AT1G06460	ALPHA-CRYSTALLIN DOMAIN 32.1 (ACD32.1)	26.7072	24.4776	50.7524	33.979
AT1G06470	Nucleotide/sugar transporter family protein	5.89374	4.46566	6.06267	5.47402
AT1G06475	transmembrane protein	1.97462	3.77503	2.5096	2.75308
AT1G06500	hypothetical protein	4.79697	4.36861	5.59164	4.91907
AT1G06510	forkhead-associated domain protein	14.5547	15.5047	16.504	15.5211
AT1G06515	SMALL SUBUNIT OF SPT A; SSSPTA	7.27976	4.55475	6.84479	6.22643
AT1G06520	GLYCEROL-3-PHOSPHATE ACYLTRANSFERASE 1 (GPAT1)	2.89827	2.85516	2.18121	2.64488
AT1G06530	PEROXISOMAL AND MITOCHONDRIAL DIVISION FACTOR 2 (PMD2)	72.7613	82.9626	61.373	72.3656
AT1G06540	hypothetical protein	0.844846	4.6032	0.238609	1.89555
AT1G06550	ATP-dependent caseinolytic (Clp) protease/crotonase family protein	8.67076	13.2495	3.63437	8.51822
AT1G06560	NOP2C	2.37023	2.37659	2.31021	2.35234
AT1G06570	PHYTOENE DESATURATION 1 (PDS1)	80.5551	112.386	45.8983	79.613
AT1G06580	PENTATRICOPEPTIDE REPEAT 1; PPR1	2.02216	1.97365	1.84861	1.94814
AT1G06590	anaphase-promoting complex subunit	1.3026	0.959468	1.23287	1.16498
AT1G06620	2-oxoglutarate (2OG) and Fe(II)-dependent oxygenase superfamily protein	18.6677	35.2305	50.3115	34.7366
AT1G06630	F-box/RNI-like superfamily protein	7.51909	8.67066	9.54779	8.57918
AT1G06640	2-oxoglutarate (2OG) and Fe(II)-dependent oxygenase superfamily protein	71.7149	99.3749	70.927	80.6723
AT1G06645	2-oxoglutarate (2OG) and Fe(II)-dependent oxygenase superfamily protein	16.7271	12.7157	13.3969	14.2799
AT1G06650	2-oxoglutarate (2OG) and Fe(II)-dependent oxygenase superfamily protein	76.6566	93.4499	83.3372	84.4812
AT1G06670	NUCLEAR DEIH-BOXHELICASE (NIH)	8.88678	10.3624	7.0271	8.75875
AT1G06680	PHOTOSYSTEM II SUBUNIT P-1 (PSBP-1)	3157.93	3134.87	2565.52	2952.77
AT1G06690	NAD(P)-linked oxidoreductase superfamily protein	37.0261	46.8543	26.9263	36.9356
AT1G06700	Protein kinase superfamily protein	29.0075	23.4344	23.2709	25.2376
AT1G06710	Tetratricopeptide repeat (TPR)-like superfamily protein	1.13126	0.910619	1.36208	1.13465
AT1G06720	P-loop containing nucleoside triphosphate hydrolases superfamily protein	3.52349	6.02004	3.24091	4.26148
AT1G06730	pfkB-like carbohydrate kinase family protein	6.51137	6.02383	4.58693	5.70738
AT1G06760	H1.1; HISTONE 1.1	83.9457	55.1684	89.114	76.076
AT1G06770	DREB2A-INTERACTING PROTEIN 1 (DRIP1)	3.38873	5.05874	5.661	4.70282
AT1G06780	GALACTURONOSYLTRANSFERASE 6 (GAUT6)	3.21978	3.0814	4.10826	3.46982
AT1G06790	RNA polymerase Rpb7 N-terminal domain-containing protein	2.09418	2.48387	1.79851	2.12552
AT1G06800	PHOSPHOLIPASE A I GAMMA 1 (PLA-I\{gamma\}1)	5.66025	5.62823	5.57026	5.61958
AT1G06820	CAROTENOID ISOMERASE (CRTISO)	18.5039	17.3892	11.4935	15.7956
AT1G06830	Glutaredoxin family protein	210.248	161.303	56.8559	142.802
AT1G06840	Leucine-rich repeat protein kinase family protein	7.23151	4.74834	5.43321	5.80435
AT1G06850	BASIC LEUCINE-ZIPPER 52 (bZIP52)	7.48506	6.01011	6.9762	6.82379
AT1G06870	PLASTIDIC TYPE I SIGNAL PEPTIDASE 2A (PLSP2A)	8.77281	9.22587	7.56191	8.5202
AT1G06890	UDP-XYLOSE TRANSPORTER3; UXT3	18.7669	11.9107	18.9859	16.5545
AT1G06900	Insulinase (Peptidase family M16) family protein	12.2288	9.49265	7.64778	9.78976
AT1G06910	TRF-LIKE 7 (TRFL7)	2.36236	1.49871	1.42013	1.7604
AT1G06950	TRANSLOCON AT THE INNER ENVELOPE MEMBRANE OF CHLOROPLASTS 110 (TIC110)	43.502	33.4151	25.3243	34.0804
AT1G06960	RNA-binding (RRM/RBD/RNP motifs) family protein	8.49047	6.78856	5.34214	6.87373
AT1G07000	EXOCYST SUBUNIT EXO70 FAMILY PROTEIN B2 (EXO70B2)	129.359	154.219	163.633	149.07
AT1G07010	SHEWENELLA-LIKE PROTEIN PHOSPHATASE 1 (SLP1)	73.3245	70.0699	27.0522	56.8155
AT1G07020	hypothetical protein	9.96852	9.59873	21.9291	13.8321
AT1G07030	Mitochondrial substrate carrier family protein	6.32029	7.59919	7.71651	7.212
AT1G07040	plant/protein	5.87969	5.93436	18.4703	10.0948
AT1G07070	Ribosomal protein L35Ae family protein	6.86716	6.93703	3.25642	5.68687
AT1G07080	Thioredoxin superfamily protein	45.2477	53.0718	45.9746	48.0981
AT1G07090	LIGHT SENSITIVE HYPOCOTYLS 6 (LSH6)	8.33737	3.54205	12.8528	8.24408
AT1G07110	"FRUCTOSE-2,6-BISPHOSPHATASE" (F2KP)	52.566	42.4356	29.5903	41.5306
AT1G07135	glycine-rich protein	717.981	576.484	897.231	730.565
AT1G07140	(SIRANBP)	87.5083	86.6487	90.0487	88.0686
AT1G07150	MITOGEN-ACTIVATED PROTEIN KINASE KINASE KINASE 13 (MAPKKK13)	7.79694	11.011	7.33659	8.71484
AT1G07160	Protein phosphatase 2C family protein	3.45996	2.78951	2.57979	2.94309
AT1G07170	PHF5-like protein	10.6999	9.13208	14.5162	11.4494
AT1G07180	ALTERNATIVE NAD(P)H DEHYDROGENASE 1 (NDA1)	124.619	180.675	36.8549	114.049
AT1G07200	Double Clp-N motif-containing P-loop nucleoside triphosphate hydrolases superfamily protein	35.6571	29.8087	15.0576	26.8411
AT1G07210	Ribosomal protein S18	12.8637	13.7117	12.634	13.0698
AT1G07220	O-glucosyltransferase rumi-like protein (DUF821)	14.2598	18.5346	15.5531	16.1158
AT1G07230	NON-SPECIFIC PHOSPHOLIPASE C1 (NPC1)	15.3728	14.7737	20.9442	17.0303
AT1G07240	UDP-GLUCOSYL TRANSFERASE 71C5 (UGT71C5)	20.1412	13.1748	28.5123	20.6095
AT1G07250	UDP-GLUCOSYL TRANSFERASE 71C4 (UGT71C4)	29.499	27.5006	23.8656	26.9551
AT1G07280	Tetratricopeptide repeat (TPR)-like superfamily protein	39.433	31.964	47.9988	39.7986
AT1G07300	josephin protein-like protein	9.90444	13.9741	12.1682	12.0156
AT1G07310	Calcium-dependent lipid-binding (CaLB domain) family protein	26.4536	26.0051	39.0968	30.5185
AT1G07320	RIBOSOMAL PROTEIN L4 (RPL4)	402.237	352.336	238.399	330.99
AT1G07350	SERINE/ARGININE RICH-LIKE PROTEIN 45A (SR45a)	15.3373	104.309	14.5618	44.7362
AT1G07360	MOS4-ASSOCIATED COMPLEX SUBUNIT 5A (MAC5A)	16.9283	18.828	14.7291	16.8285
AT1G07370	PROLIFERATING CELLULAR NUCLEAR ANTIGEN 1 (PCNA1)	4.40807	5.05635	2.42441	3.96294
AT1G07380	Neutral/alkaline non-lysosomal ceramidase	3.23382	3.18121	3.1124	3.17581
AT1G07390	RECEPTOR LIKE PROTEIN 1 (RLP1)	1.38859	2.26212	0.869884	1.50687
AT1G07400	HSP20-like chaperones superfamily protein	1.33819	175.245	3.62826	60.0706
AT1G07410	RAB GTPASE HOMOLOG A2B (RABA2b)	1.18907	2.15958	1.59518	1.64794
AT1G07420	STEROL 4-ALPHA-METHYL-OXIDASE 2-1 (SMO2-1)	4.77816	4.24055	8.07219	5.69697
AT1G07430	HIGHLY ABA-INDUCED PP2C GENE 2 (HAI2)	0.730166	1.54947	1.99518	1.42494
AT1G07440	NAD(P)-binding Rossmann-fold superfamily protein	28.576	33.0953	41.1138	34.2617
AT1G07470	Transcription factor IIA%2C alpha/beta subunit	9.64591	9.85141	8.46826	9.32186
AT1G07480	Transcription factor IIA%2C alpha/beta subunit	9.63808	9.38448	8.38983	9.13746
AT1G07500	hypothetical protein	26.2728	47.8734	11.71	28.6187
AT1G07510	FTSH PROTEASE 10 (ftsh10)	19.4965	29.2574	15.9641	21.5727
AT1G07520	GRAS family transcription factor	25.2616	15.196	14.526	18.3279
AT1G07530	SCARECROW-LIKE 14 (SCL14)	24.665	24.6492	23.269	24.1944
AT1G07570	(APK1A)	15.9471	11.1662	3.72695	10.2801
AT1G07590	Tetratricopeptide repeat (TPR)-like superfamily protein	112.926	168.259	96.5517	125.912
AT1G07610	METALLOTHIONEIN 1C (MT1C)	45.0294	74.4647	46.5783	55.3575
AT1G07615	OBG A-1	3.29941	3.38202	3.37547	3.3523
AT1G07620	(ATOBGM)	11.8411	13.6166	12.6227	12.6935
AT1G07630	POL-LIKE 5 (PLL5)	12.4507	12.3358	21.5501	15.4456
AT1G07640	(OBP2)	25.25	25.2204	24.7676	25.0793
AT1G07650	Leucine-rich repeat transmembrane protein kinase	17.548	18.2713	22.2825	19.3673
AT1G07660	Histone superfamily protein	37.7364	36.405	33.0725	35.738
AT1G07670	ENDOMEMBRANE-TYPE CA-ATPASE 4 (ECA4)	19.9894	23.8675	24.9041	22.9203
AT1G07700	Thioredoxin superfamily protein	69.9128	76.9344	42.1088	62.9853
AT1G07705	NEGATIVE ON TATA LESS2A; NOT2A	4.3568	3.67357	5.12397	4.38478
AT1G07720	3-KETOACYL-COA SYNTHASE 3 (KCS3)	71.1587	77.3999	47.6403	65.3997
AT1G07745	HOMOLOG OF RAD51 D (RAD51D)	3.0266	3.16108	2.06501	2.7509
AT1G07750	RmlC-like cupins superfamily protein	13.0173	14.7128	14.5549	14.095
AT1G07770	RIBOSOMAL PROTEIN S15A (RPS15A)	141.026	132.012	82.4718	118.503
AT1G07780	PHOSPHORIBOSYLANTHRANILATE ISOMERASE 1 (PAI1)	6.88551	6.46501	5.32823	6.22625
AT1G07790	(HTB1)	23.7166	19.5873	14.9336	19.4125
AT1G07810	ER-TYPE CA2+-ATPASE 1 (ECA1)	12.2409	11.5136	15.1558	12.9701
AT1G07820	Histone superfamily protein	49.5262	35.991	45.502	43.6731
AT1G07830	ribosomal protein L29 family protein	8.72028	7.40616	7.69371	7.94005
AT1G07840	Sas10/Utp3/C1D family	5.88376	7.57678	4.36207	5.94087
AT1G07870	Protein kinase superfamily protein	12.277	23.5768	19.6495	18.5011
AT1G07880	(ATMPK13)	2.68688	2.6727	2.77455	2.71138
AT1G07890	ASCORBATE PEROXIDASE 1 (APX1)	197.576	381.254	196.448	258.426
AT1G07900	LOB DOMAIN-CONTAINING PROTEIN 1 (LBD1)	1.98015	4.25365	6.61951	4.28444
AT1G07901	hypothetical protein	8.32652	8.18664	8.46594	8.32637
AT1G07910	RNALIGASE (RNL)	2.39988	1.67444	2.25521	2.10984
AT1G07920	GTP binding Elongation factor Tu family protein	255.571	310.728	202.467	256.255
AT1G07930	GTP binding Elongation factor Tu family protein	219.622	273.871	168.211	220.568
AT1G07940	GTP binding Elongation factor Tu family protein	237.919	287.96	187.712	237.864
AT1G07950	(MED22B)	7.32043	6.09784	7.38393	6.93407
AT1G07960	PDI-LIKE 5-1 (PDIL5-1)	9.33724	9.0127	8.08162	8.81052
AT1G07970	cytochrome B561%2C amino-terminal protein	5.22627	4.62106	4.56653	4.80462
AT1G07980	"NUCLEAR FACTOR Y, SUBUNIT C10" (NF-YC10)	5.6157	6.8205	6.73482	6.39034
AT1G07990	SIT4 phosphatase-associated family protein	9.82682	10.3647	11.9247	10.7054
AT1G08000	GATA TRANSCRIPTION FACTOR 10 (GATA10)	6.05349	6.02834	4.65077	5.57754
AT1G08010	GATA TRANSCRIPTION FACTOR 11 (GATA11)	8.71376	9.09018	5.62449	7.80947
AT1G08030	TYROSYLPROTEIN SULFOTRANSFERASE (TPST)	5.28996	4.67621	4.62192	4.8627
AT1G08040	trimethylguanosine synthase (DUF707)	5.56137	4.7936	4.78415	5.04637
AT1G08050	Zinc finger (C3HC4-type RING finger) family protein	8.76267	14.5777	25.2124	16.1842
AT1G08060	MORPHEUS MOLECULE (MOM)	4.89317	4.46879	5.1824	4.84812
AT1G08110	ATGLYI2; GLYOXALASE12	37.531	36.8776	31.2311	35.2132
AT1G08115		1.79747	0	2.6652	1.48756
AT1G08125	S-adenosyl-L-methionine-dependent methyltransferases superfamily protein	3.61179	3.75936	4.23897	3.87004
AT1G08130	DNA LIGASE 1 (LIG1)	3.93482	4.24285	2.11089	3.42952
AT1G08160	Late embryogenesis abundant (LEA) hydroxyproline-rich glycoprotein family	16.4727	21.8093	9.41686	15.8996
AT1G08180	cyclin-dependent kinase inhibitor	5.55909	4.63066	4.54192	4.91056
AT1G08190	VACUOLAR PROTEIN SORTING 41 (VPS41)	27.728	28.0462	14.6985	23.4909
AT1G08200	UDP-D-APIOSE/UDP-D-XYLOSE SYNTHASE 2 (AXS2)	111.989	137.721	62.2506	103.987
AT1G08210	Eukaryotic aspartyl protease family protein	4.36786	3.16857	4.0388	3.85841
AT1G08220	ATPase complex subunit	1.32819	1.79558	1.70144	1.6084
AT1G08230	Transmembrane amino acid transporter family protein	2.8144	3.13375	2.88348	2.94388
AT1G08250	AROGENATE DEHYDRATASE 6 (ADT6)	13.2245	9.73729	3.96974	8.97717
AT1G08260	TILTED 1 (TIL1)	0.974499	1.14923	0.924298	1.01601
AT1G08280	GALT29A; GLYCOSYLTRANSFERASE 29A	2.86961	1.81906	1.57827	2.08898
AT1G08290	WIP DOMAIN PROTEIN 3 (WIP3)	1.70392	2.43027	3.04888	2.39436
AT1G08300	NO VEIN-LIKE (NVL)	1.88735	3.34015	2.27685	2.50145
AT1G08315	ARM repeat superfamily protein	15.4191	13.6874	23.3021	17.4695
AT1G08340	Rho GTPase activating protein with PAK-box/P21-Rho-binding domain-containing protein	1.8159	2.43013	1.11121	1.78575
AT1G08350	Endomembrane protein 70 protein family	2.18895	1.61903	2.80734	2.20511
AT1G08360	Ribosomal protein L1p/L10e family	126.565	140.992	80.1684	115.908
AT1G08370	DECAPPING 1 (DCP1)	14.3663	17.4464	16.4724	16.095
AT1G08380	PHOTOSYSTEM I SUBUNIT O (PSAO)	2412.21	2249.67	2386.54	2349.47
AT1G08390	recQ-mediated instability-like protein	6.14569	5.18004	4.4304	5.25204
AT1G08400	RINT-1 / TIP-1 family	1.74865	1.52751	1.61837	1.63151
AT1G08410	P-loop containing nucleoside triphosphate hydrolases superfamily protein	4.67675	6.25428	3.60495	4.84533
AT1G08420	BRI1 SUPPRESSOR 1 (BSU1)-LIKE 2 (BSL2)	12.848	13.7411	14.2124	13.6005
AT1G08450	CALRETICULIN 3 (CRT3)	36.9677	69.1276	149.419	85.1714
AT1G08460	HISTONE DEACETYLASE 8 (HDA08)	17.3137	16.0643	25.8701	19.7494
AT1G08465	YABBY2 (YAB2)	3.83338	3.20845	2.64966	3.2305
AT1G08470	STRICTOSIDINE SYNTHASE-LIKE 3 (SSL3)	14.4563	11.4426	9.53016	11.8097
AT1G08480	SUCCINATE DEHYDROGENASE 6 (SDH6)	31.8883	34.5024	33.0621	33.151
AT1G08490	CHLOROPLASTIC NIFS-LIKE CYSTEINE DESULFURASE (CPNIFS)	35.0851	35.9092	24.8759	31.9567
AT1G08510	FATTY ACYL-ACP THIOESTERASES B (FATB)	57.7657	64.2229	51.0949	57.6945
AT1G08520	ALBINA 1 (ALB1)	91.5092	79.4369	64.2165	78.3875
AT1G08530	chitinase-like protein	7.705	6.93627	7.1068	7.24936
AT1G08540	RNAPOLYMERASE SIGMA SUBUNIT 2 (SIG2)	48.3036	44.8089	35.5234	42.8786
AT1G08550	NON-PHOTOCHEMICAL QUENCHING 1 (NPQ1)	44.5913	26.4631	43.6824	38.2456
AT1G08560	SYNTAXIN OF PLANTS 111 (SYP111)	8.78004	8.50682	4.26129	7.18272
AT1G08570	ATYPICAL CYS HIS RICH THIOREDOXIN 4 (ACHT4)	198.827	168.383	64.1297	143.78
AT1G08580	hypothetical protein	10.8977	14.1062	6.41923	10.4744
AT1G08600	(ATRX)	3.0859	3.42459	3.76761	3.42604
AT1G08610	Pentatricopeptide repeat (PPR) superfamily protein	2.74295	3.72543	2.23852	2.9023
AT1G08620	(PKDM7D)	6.5398	6.65878	6.19453	6.46437
AT1G08640	CHLOROPLAST J-LIKE DOMAIN 1 (CJD1)	27.5928	25.6801	18.8403	24.0377
AT1G08650	PHOSPHOENOLPYRUVATE CARBOXYLASE KINASE 1 (PPCK1)	47.6382	53.3766	30.9598	43.9915
AT1G08660	MALE GAMETOPHYTE DEFECTIVE 2 (MGP2)	8.44547	5.5184	9.65297	7.87228
AT1G08680	ARF GAP-LIKE ZINC FINGER-CONTAINING PROTEIN ZIGA4 (ZIGA4)	6.57438	7.08957	6.49879	6.72091
AT1G08700	PRESENILIN-1 (PS1)	19.1953	23.0727	18.8973	20.3884
AT1G08710	F-box family protein	4.99787	5.20756	6.03982	5.41508
AT1G08720	ENHANCED DISEASE RESISTANCE 1 (EDR1)	12.513	14.805	21.0285	16.1155
AT1G08750	ATGPI8; GPI8	3.96391	2.83879	3.10979	3.30416
AT1G08760	GPI-anchored adhesin-like protein%2C putative (DUF936)	6.4714	6.98647	6.55509	6.67098
AT1G08770	PRENYLATED RAB ACCEPTOR 1.E (PRA1.E)	17.6734	15.9767	16.6858	16.7786
AT1G08780	ABI3-INTERACTING PROTEIN 3 (AIP3)	7.4651	7.55904	6.32508	7.11641
AT1G08800	MYOB1; MYOSIN BINDING PROTEIN 1	9.49694	8.1006	6.10198	7.89984
AT1G08810	MYB DOMAIN PROTEIN 60 (MYB60)	7.98531	6.02281	3.35975	5.78929
AT1G08820	VAMP/SYNAPTOBREVIN-ASSOCIATED PROTEIN 27-2 (VAP27-2)	10.0185	10.651	14.9481	11.8725
AT1G08830	COPPER/ZINC SUPEROXIDE DISMUTASE 1 (CSD1)	69.0528	69.895	42.725	60.5576
AT1G08840	EMBRYO DEFECTIVE 2411 (emb2411)	1.44973	0.98974	0.599351	1.01294
AT1G08845	Ribosomal L18p/L5e family protein	2.09961	2.8708	1.85013	2.27351
AT1G08880	(H2AXA)	47.6346	39.5957	38.2245	41.8182
AT1G08890	Major facilitator superfamily protein	0.835048	0.436356	2.25622	1.17587
AT1G08900	Major facilitator superfamily protein	14.5442	13.8964	14.771	14.4039
AT1G08910	zinc ion binding protein	5.58792	7.41467	4.86557	5.95605
AT1G08920	ERD (EARLY RESPONSE TO DEHYDRATION) SIX-LIKE 1 (ESL1)	12.8542	16.0225	9.65685	12.8445
AT1G08930	EARLY RESPONSE TO DEHYDRATION 6 (ERD6)	153.571	95.2307	145.053	131.285
AT1G08940	Phosphoglycerate mutase family protein	4.67914	4.43508	9.20199	6.1054
AT1G08960	CATION EXCHANGER 11 (CAX11)	4.00527	2.93391	3.22691	3.3887
AT1G08970	"NUCLEAR FACTOR Y, SUBUNIT C9" (NF-YC9)	21.8313	21.6125	20.6735	21.3724
AT1G08980	AMIDASE 1 (AMI1)	43.3986	31.3422	65.2529	46.6646
AT1G09010	glycoside hydrolase family 2 protein	21.5856	18.8918	22.6678	21.0484
AT1G09020	HOMOLOG OF YEAST SUCROSE NONFERMENTING 4 (SNF4)	13.4695	12.6141	12.3248	12.8028
AT1G09040	arginine-glutamic acid dipeptide repeat protein	0.790302	1.04045	1.88709	1.23928
AT1G09050	arginine-glutamic acid dipeptide repeat protein	1.28586	1.72323	2.86936	1.95948
AT1G09060	JMJ24	41.3563	46.9764	30.3152	39.5493
AT1G09070	SOYBEAN GENE REGULATED BY COLD-2 (SRC2)	1781.27	2226.47	1806.54	1938.09
AT1G09080	BINDING PROTEIN 3 (BIP3)	1.38662	8.23904	34.9757	14.8671
AT1G09100	26S PROTEASOME AAA-ATPASE SUBUNIT RPT5B (RPT5B)	7.37339	5.96668	9.05704	7.46571
AT1G09130	ATP-dependent caseinolytic (Clp) protease/crotonase family protein	91.3325	92.8486	76.35	86.8437
AT1G09140	SERINE/ARGININE-RICH PROTEIN SPLICING FACTOR 30 (SR30)	12.6507	29.4032	17.3987	19.8175
AT1G09150	pseudouridine synthase and archaeosine transglycosylase (PUA) domain-containing protein	8.89169	7.26491	7.62851	7.92837
AT1G09160	Protein phosphatase 2C family protein	14.8762	17.5933	12.7946	15.0881
AT1G09180	SECRETION-ASSOCIATED RAS SUPER FAMILY 1 (SARA1A)	6.0537	6.5924	1.6881	4.77806
AT1G09190	Tetratricopeptide repeat (TPR)-like superfamily protein	2.04871	2.01057	2.4109	2.15673
AT1G09195	Ppx-GppA phosphatase	2.82272	1.83009	3.33619	2.663
AT1G09200	Histone superfamily protein	57.9862	45.6038	63.6619	55.7506
AT1G09210	CALRETICULIN 1B (CRT1b)	23.8375	35.1617	45.3885	34.7959
AT1G09230	RNA-binding (RRM/RBD/RNP motifs) family protein	3.37612	4.39706	3.06912	3.6141
AT1G09240	NICOTIANAMINE SYNTHASE 3 (NAS3)	15.3457	34.938	2.19582	17.4932
AT1G09250	basic helix-loop-helix (bHLH) DNA-binding superfamily protein	46.2413	45.3732	39.2741	43.6295
AT1G09270	IMPORTIN ALPHA ISOFORM 4 (IMPA-4)	17.5855	19.2401	18.4289	18.4182
AT1G09280	rhodanese-like domain protein	6.82477	5.34881	6.56889	6.24749
AT1G09290	hypothetical protein	3.32224	3.62494	3.28175	3.40964
AT1G09300	ATICP55	1.14156	1.3006	1.77107	1.40441
AT1G09310	plant/protein (Protein of unknown function%2C DUF538)	914.024	928.802	492.547	778.458
AT1G09320	agenet domain-containing protein	2.88426	2.48133	2.95292	2.77284
AT1G09330	golgi apparatus membrane protein-like protein ECHIDNA protein	12.8255	12.8839	14.4406	13.3834
AT1G09340	CHLOROPLAST RNA BINDING (CRB)	615.574	639.377	359.877	538.276
AT1G09390	GDSL-like Lipase/Acylhydrolase superfamily protein	6.4692	6.80661	8.38387	7.21989
AT1G09415	NIM1-INTERACTING 3 (NIMIN-3)	28.4522	31.4892	27.4501	29.1305
AT1G09430	ATP-CITRATE LYASE A-3 (ACLA-3)	19.6257	22.4629	32.7321	24.9402
AT1G09440	Protein kinase superfamily protein	5.53396	4.87485	2.48691	4.29857
AT1G09460	Carbohydrate-binding X8 domain superfamily protein	1.52077	1.45846	1.28853	1.42259
AT1G09486		2.65583	2.11645	1.4449	2.07239
AT1G09490	NAD(P)-binding Rossmann-fold superfamily protein	10.6748	15.6512	15.1651	13.8304
AT1G09500	NAD(P)-binding Rossmann-fold superfamily protein	0.536403	1.67007	3.9443	2.05026
AT1G09520	hypothetical protein	15.6795	25.5801	14.3177	18.5258
AT1G09530	PHYTOCHROME INTERACTING FACTOR 3 (PIF3)	3.49468	4.29093	4.74385	4.17648
AT1G09560	GERMIN-LIKE PROTEIN 5 (GLP5)	125.799	176.489	220.33	174.206
AT1G09570	PHYTOCHROME A (PHYA)	25.3408	23.8956	46.0669	31.7678
AT1G09575	calcium uniporter-like protein (DUF607)	17.5468	17.0667	22.1411	18.9182
AT1G09580	emp24/gp25L/p24 family/GOLD family protein	3.80445	2.47618	2.33611	2.87225
AT1G09590	Translation protein SH3-like family protein	84.9401	97.4648	54.4253	78.9434
AT1G09620	ATP binding/leucine-tRNA ligases/aminoacyl-tRNA ligase	51.8697	49.6722	38.161	46.5676
AT1G09630	RAB GTPASE 11C (RAB11c)	9.83686	7.12499	8.64181	8.53455
AT1G09640	Translation elongation factor EF1B%2C gamma chain	88.4756	111.906	72.2516	90.8776
AT1G09645	transmembrane protein	15.5642	12.4252	19.9331	15.9742
AT1G09660	RNA-binding KH domain-containing protein	6.92059	7.80021	6.38329	7.0347
AT1G09680	Pentatricopeptide repeat (PPR) superfamily protein	0.83813	0.869831	2.23186	1.31327
AT1G09690	Translation protein SH3-like family protein	150.936	156.083	101.5	136.173
AT1G09700	HYPONASTIC LEAVES 1 (HYL1)	4.96667	5.4873	4.56583	5.0066
AT1G09710	Homeodomain-like superfamily protein	2.48623	2.31491	2.52962	2.44359
AT1G09730	ARABIDOPSIS SUMO PROTEASE 1; ASP1	6.39175	6.00719	7.81341	6.73745
AT1G09740	Adenine nucleotide alpha hydrolases-like superfamily protein	5.92733	6.20054	8.02836	6.71874
AT1G09750	Eukaryotic aspartyl protease family protein	42.8481	44.0827	41.8252	42.9187
AT1G09760	U2 SMALL NUCLEAR RIBONUCLEOPROTEIN A (U2A')	11.1266	12.5678	10.0879	11.2608
AT1G09770	CELL DIVISION CYCLE 5 (CDC5)	35.6439	36.0228	47.8549	39.8406
AT1G09780	2,3-BIPHOSPHOGLYCERATE-INDEPENDENT PHOSPHOGLYCERATE MUTASE 1 (iPGAM1)	121.208	93.6077	44.4839	86.4332
AT1G09794	Cox19 family protein (CHCH motif)	2.12058	2.21691	2.34258	2.22669
AT1G09795	ATP PHOSPHORIBOSYL TRANSFERASE 2 (ATP-PRT2)	34.6096	26.4952	25.1781	28.761
AT1G09810	EVOLUTIONARILY CONSERVED C-TERMINAL REGION 11 (ECT11)	3.12085	3.94796	2.88805	3.31895
AT1G09815	POLYMERASE DELTA 4 (POLD4)	11.4944	12.0383	18.4547	13.9958
AT1G09820	Pentatricopeptide repeat (PPR-like) superfamily protein	3.71346	2.8659	1.87042	2.8166
AT1G09830	PURINE BIOSYNTHESIS 2 (PUR2)	20.194	24.4636	18.2543	20.9706
AT1G09840	SHAGGY-LIKE PROTEIN KINASE 41 (SK41)	11.4052	9.66236	8.55216	9.87323
AT1G09850	XYLEM BARK CYSTEINE PEPTIDASE 3 (XBCP3)	11.6996	10.4557	11.5126	11.2227
AT1G09870	histidine acid phosphatase family protein	11.4877	12.0961	13.2835	12.2891
AT1G09890	Rhamnogalacturonate lyase family protein	1.10233	1.4794	0.438973	1.0069
AT1G09900	Pentatricopeptide repeat (PPR-like) superfamily protein	8.42621	8.15521	5.06281	7.21474
AT1G09910	Rhamnogalacturonate lyase family protein	5.54825	4.29839	5.56999	5.13888
AT1G09920	TRAF-type zinc finger-like protein	12.2753	12.2964	11.5764	12.0494
AT1G09930	OLIGOPEPTIDE TRANSPORTER 2 (OPT2)	4.84557	8.35364	14.7922	9.33047
AT1G09932	Phosphoglycerate mutase family protein	30.2274	44.8754	107.349	60.8174
AT1G09940	(HEMA2)	119.419	125.794	103.327	116.18
AT1G09950	RESPONSE TO ABA AND SALT 1 (RAS1)	43.9479	50.4519	37.747	44.0489
AT1G09960	SUCROSE TRANSPORTER 4 (SUT4)	3.45959	3.39548	2.39456	3.08321
AT1G09970	(LRR XI-23)	241.851	248.287	196.81	228.982
AT1G09980	Putative serine esterase family protein	7.99147	6.63209	7.00079	7.20812
AT1G09995	DNA repair DEAD helicase RAD3/XP-D subfamily protein	3.18625	2.69467	2.40224	2.76105
AT1G10020	formin-like protein (DUF1005)	28.2762	42.9603	24.6308	31.9558
AT1G10030	HOMOLOG OF YEAST ERGOSTEROL28 (ERG28)	5.20758	4.87416	3.14071	4.40748
AT1G10040	alpha/beta-Hydrolases superfamily protein	1.16704	1.24943	1.71396	1.37681
AT1G10050	glycosyl hydrolase family 10 protein / carbohydrate-binding domain-containing protein	6.63524	10.7427	10.1532	9.17705
AT1G10060	BRANCHED-CHAIN AMINO ACID TRANSAMINASE 1 (BCAT-1)	2.39783	1.6008	1.68767	1.89543
AT1G10070	BRANCHED-CHAIN AMINO ACID TRANSAMINASE 2 (BCAT-2)	0.259446	0.0875301	5.99994	2.11564
AT1G10090	Early-responsive to dehydration stress protein (ERD4)	9.70552	9.79268	11.2299	10.2427
AT1G10095	Protein prenylyltransferase superfamily protein	1.16663	0.990269	1.6112	1.25603
AT1G10120	CIB4; CRY2-INTERACTING BHLH 4	8.60977	8.15255	4.29505	7.01912
AT1G10130	ENDOPLASMIC RETICULUM-TYPE CALCIUM-TRANSPORTING ATPASE 3 (ECA3)	3.54827	2.90827	3.90832	3.45496
AT1G10140	Uncharacterized conserved protein UCP031279	5.40866	9.78123	31.3356	15.5085
AT1G10150	Carbohydrate-binding protein	31.5212	41.2623	18.4077	30.3971
AT1G10155	PHLOEM PROTEIN 2-A10 (PP2-A10)	19.6787	12.9061	1.89903	11.4946
AT1G10170	NF-X-LIKE 1 (NFXL1)	22.5566	26.8168	30.1834	26.5189
AT1G10180	LOW protein: exocyst complex component-like protein	5.06456	5.06428	5.19601	5.10828
AT1G10200	WLIM1 (WLIM1)	19.1726	13.9824	28.6756	20.6102
AT1G10210	MITOGEN-ACTIVATED PROTEIN KINASE 1 (MPK1)	4.3968	3.57508	6.58616	4.85268
AT1G10230	SKP1-LIKE 18 (SK18)	5.7666	15.6636	7.54393	9.65803
AT1G10240	FAR1-RELATED SEQUENCE 11 (FRS11)	3.0534	3.55532	3.05571	3.22148
AT1G10270	GLUTAMINE-RICH PROTEIN 23 (GRP23)	3.03628	3.42687	2.87222	3.11179
AT1G10280	Core-2/I-branching beta-1%2C6-N-acetylglucosaminyltransferase family protein	3.77552	3.52878	3.24634	3.51688
AT1G10290	DYNAMIN-LIKE PROTEIN 6 (ADL6)	12.3912	13.0104	17.3716	14.2577
AT1G10310	NAD(P)-binding Rossmann-fold superfamily protein	7.84918	7.61421	8.26315	7.90885
AT1G10320	Zinc finger C-x8-C-x5-C-x3-H type family protein	4.48717	4.1256	4.67365	4.42881
AT1G10330	Tetratricopeptide repeat (TPR)-like superfamily protein	0.907377	1.54637	1.27403	1.24259
AT1G10340	Ankyrin repeat family protein	34.2634	86.1016	131.393	83.9194
AT1G10350	DNAJ heat shock family protein	13.5309	12.0774	17.1314	14.2466
AT1G10360	GLUTATHIONE S-TRANSFERASE TAU 18 (GSTU18)	101.083	86.7999	62.9694	83.6174
AT1G10370	EARLY-RESPONSIVE TO DEHYDRATION 9 (ERD9)	113.497	291.022	29.7302	144.75
AT1G10380	Putative membrane lipoprotein	14.3562	20.4023	6.70986	13.8228
AT1G10390	DRA2; DRACULA2	21.364	22.239	22.0651	21.8893
AT1G10410	CW14 protein (DUF1336)	8.64471	8.46322	11.8256	9.6445
AT1G10430	PROTEIN PHOSPHATASE 2A-2 (PP2A-2)	15.1605	12.1421	11.844	13.0489
AT1G10450	SIN3-LIKE 6 (SNL6)	4.17501	4.45961	4.52005	4.38489
AT1G10460	GERMIN-LIKE PROTEIN 7 (GLP7)	2.36829	1.92251	2.00662	2.09914
AT1G10470	RESPONSE REGULATOR 4 (ARR4)	102.524	135.367	115.136	117.675
AT1G10490	GNAT acetyltransferase (DUF699)	4.00766	5.92986	2.31938	4.08563
AT1G10500	CHLOROPLAST-LOCALIZED ISCA-LIKE PROTEIN (CPISCA)	44.433	52.0072	50.4111	48.9504
AT1G10510	EMBRYO DEFECTIVE 2004 (emb2004)	13.6233	12.7307	9.87154	12.0752
AT1G10522	PLASTID REDOX INSENSITIVE 2 (PRIN2)	9.02323	6.18384	8.7305	7.97919
AT1G10550	XYLOGLUCAN:XYLOGLUCOSYL TRANSFERASE 33 (XTH33)	2.45831	4.1388	3.04035	3.21249
AT1G10560	PLANT U-BOX 18 (PUB18)	8.17676	9.57178	6.16546	7.97133
AT1G10570	OVERLY TOLERANT TO SALT 2 (OTS2)	5.94166	4.44193	6.31999	5.56786
AT1G10580	Transducin/WD40 repeat-like superfamily protein	11.1404	10.9265	11.6859	11.2509
AT1G10590	Nucleic acid-binding%2C OB-fold-like protein	57.7274	57.6026	52.2417	55.8573
AT1G10600	ASSOCIATED MOLECULE WITH THE SH3 DOMAIN OF STAM 2 (AMSH2)	10.0557	10.2117	12.7544	11.0073
AT1G10610	basic helix-loop-helix (bHLH) DNA-binding superfamily protein	4.96758	4.42531	4.72278	4.70523
AT1G10630	ADP-RIBOSYLATION FACTOR A1F (ARFA1F)	23.1748	24.8353	22.903	23.6377
AT1G10650	SBP (S-ribonuclease binding protein) family protein	31.1164	31.6411	15.8372	26.1982
AT1G10657	transmembrane protein	6.95704	8.73876	4.57224	6.75601
AT1G10660	transmembrane protein	23.0517	19.1954	17.7206	19.9892
AT1G10670	ATP-CITRATE LYASE A-1 (ACLA-1)	74.2383	65.1886	45.5894	61.6721
AT1G10682	SHORT OPEN READING FRAME 1; SORF1	35.1124	43.5747	43.343	40.6767
AT1G10690	cyclin-dependent kinase inhibitor	4.03169	4.9503	7.84236	5.60812
AT1G10700	PHOSPHORIBOSYL PYROPHOSPHATE (PRPP) SYNTHASE 3 (PRS3)	13.8467	12.6473	19.3137	15.2692
AT1G10720	BSD domain-containing protein	12.5423	12.5394	14.6866	13.2561
AT1G10730	ADAPTOR PROTEIN-1 MU-ADAPTIN 1; AP1M1	2.85912	2.93723	4.16616	3.32084
AT1G10740	alpha/beta-Hydrolases superfamily protein	53.7298	58.3872	19.94	44.019
AT1G10760	STARCH EXCESS 1 (SEX1)	15.0929	15.11	36.3943	22.1991
AT1G10810	NAD(P)-linked oxidoreductase superfamily protein	1.15516	1.50691	1.26662	1.30956
AT1G10820	hypothetical protein (DUF3755)	4.1404	3.61709	3.72273	3.82674
AT1G10830	15-CIS-ZETA-CAROTENE ISOMERASE (Z-ISO)	26.6634	27.6459	21.9644	25.4246
AT1G10840	TRANSLATION INITIATION FACTOR 3 SUBUNIT H1 (TIF3H1)	38.817	38.5302	26.8064	34.7179
AT1G10850	Leucine-rich repeat protein kinase family protein	6.77955	5.70866	1.6996	4.72927
AT1G10865	cytochrome C oxidase assembly factor	11.5362	12.1174	15.6167	13.0901
AT1G10870	ARF-GAP DOMAIN 4 (AGD4)	2.47445	2.15505	1.60046	2.07665
AT1G10890	arginine/glutamate-rich 1 protein	17.0739	20.6425	25.3519	21.0227
AT1G10900	Phosphatidylinositol-4-phosphate 5-kinase family protein	13.7719	20.4591	15.0054	16.4121
AT1G10910	EMBRYO DEFECTIVE 3103 (EMB3103)	11.8838	10.6304	9.92501	10.8131
AT1G10920	(LOV1)	6.39071	5.90934	6.77767	6.35924
AT1G10930	(RECQ4A)	1.61258	1.05776	0.929574	1.19997
AT1G10940	SNF1-RELATED PROTEIN KINASE 2.4 (SNRK2.4)	36.5937	42.3777	45.1157	41.3623
AT1G10950	TRANSMEMBRANE NINE 1 (TMN1)	29.5016	23.9269	26.4492	26.6259
AT1G10960	FERREDOXIN 1 (FD1)	654.9	1411.84	579.645	882.128
AT1G10970	ZINC TRANSPORTER 4 PRECURSOR (ZIP4)	1.68431	3.05055	2.08806	2.27431
AT1G11000	MILDEW RESISTANCE LOCUS O 4 (MLO4)	2.84366	0.889599	1.27771	1.67032
AT1G11020	RING/FYVE/PHD zinc finger superfamily protein	12.5629	12.134	11.7711	12.156
AT1G11050	Protein kinase superfamily protein	63.2114	46.0881	32.0836	47.1277
AT1G11060	ATWAPL1; WAPL1; WINGS APART-LIKE PROTEIN 1	4.36372	4.56266	4.59099	4.50579
AT1G11090	alpha/beta-Hydrolases superfamily protein	10.5283	10.4023	8.44685	9.79251
AT1G11130	STRUBBELIG (SUB)	4.31018	4.51691	1.67829	3.50179
AT1G11175		8.84883	12.557	18.7437	13.3832
AT1G11180	SECRETORY CARRIER MEMBRANE PROTEIN 2 (SCAMP2)	3.39086	2.826	4.69112	3.636
AT1G11185		5.12074	7.54074	3.22474	5.29541
AT1G11190	BIFUNCTIONAL NUCLEASE I (BFN1)	1.07252	1.27639	0.920095	1.08967
AT1G11200	organic solute transporter ostalpha protein (DUF300)	8.5522	7.26119	10.9844	8.93259
AT1G11210	cotton fiber protein%2C putative (DUF761)	9.00333	8.65356	48.1733	21.9434
AT1G11240	ribosomal RNA-processing protein	11.1251	12.8426	11.5276	11.8318
AT1G11260	SUGAR TRANSPORTER 1 (STP1)	93.5244	125.575	325.861	181.653
AT1G11280	S-locus lectin protein kinase family protein	6.54418	7.50662	3.90834	5.98638
AT1G11290	CHLORORESPIRATORY REDUCTION22 (CRR22)	5.22765	4.94837	3.31247	4.49616
AT1G11300	G-type lectin S-receptor-like Serine/Threonine-kinase	2.0103	1.53301	2.22666	1.92332
AT1G11310	MILDEW RESISTANCE LOCUS O 2 (MLO2)	76.6824	54.8901	80.4457	70.6728
AT1G11330	S-locus lectin protein kinase family protein	15.0069	16.1057	17.1641	16.0922
AT1G11340	G-type lectin S-receptor-like Serine/Threonine-kinase	1.17842	1.37699	1.14776	1.23439
AT1G11350	S-DOMAIN-1 13 (SD1-13)	23.7979	10.5321	15.6264	16.6521
AT1G11360	Adenine nucleotide alpha hydrolases-like superfamily protein	11.4548	10.9072	19.5796	13.9805
AT1G11380	PLAC8 family protein	6.77403	12.294	6.32922	8.46577
AT1G11390	Protein kinase superfamily protein	5.72785	5.75388	5.09627	5.526
AT1G11400	PARTNER OF Y14-MAGO (PYM)	7.9751	7.80114	7.02852	7.60159
AT1G11410	S-locus lectin protein kinase family protein	11.0226	14.5276	4.88034	10.1435
AT1G11430	MULTIPLE ORGANELLAR RNA EDITING FACTOR 9 (MORF9)	48.4559	46.7969	32.5107	42.5878
AT1G11440	hypothetical protein	14.973	10.8625	10.5089	12.1148
AT1G11475	(NRPB10)	7.33775	8.46806	7.78564	7.86382
AT1G11480	eukaryotic translation initiation factor-like protein	22.3406	19.7569	29.5484	23.882
AT1G11520	pliceosome associated protein-like protein	12.6872	15.5422	13.4111	13.8801
AT1G11530	C-TERMINAL CYSTEINE RESIDUE IS CHANGED TO A SERINE 1 (CXXS1)	31.2585	19.6011	23.0125	24.624
AT1G11545	XYLOGLUCAN ENDOTRANSGLUCOSYLASE/HYDROLASE 8 (XTH8)	11.008	5.69134	1.94028	6.21322
AT1G11580	METHYLESTERASE PCR A (PMEPCRA)	35.1981	50.9601	28.6166	38.2583
AT1G11592		3.95594	3.12119	2.60696	3.22803
AT1G11630	Tetratricopeptide repeat (TPR)-like superfamily protein	5.92145	6.40417	5.3653	5.89697
AT1G11650	(RBP45B)	90.8633	100.57	79.0354	90.1563
AT1G11660	heat shock protein 70 (Hsp 70) family protein	11.1382	12.2977	12.0809	11.839
AT1G11670	MATE efflux family protein	16.4994	18.2535	17.2037	17.3188
AT1G11680	CYTOCHROME P450 51G1 (CYP51G1)	47.5736	43.5672	34.3292	41.8233
AT1G11700	senescence regulator (Protein of unknown function%2C DUF584)	12.3266	8.09329	4.21987	8.21326
AT1G11710	Pentatricopeptide repeat (PPR) superfamily protein	1.2243	1.23078	0.641048	1.03204
AT1G11720	STARCH SYNTHASE 3 (SS3)	20.1148	23.1338	13.2245	18.8244
AT1G11750	CLP PROTEASE PROTEOLYTIC SUBUNIT 6 (CLPP6)	62.3111	57.6507	45.5457	55.1692
AT1G11755	LEAF WILTING 1 (LEW1)	4.80262	3.80792	3.82647	4.14567
AT1G11760	(MED32)	4.7855	3.69279	4.86563	4.44797
AT1G11780	oxidoreductase%2C 2OG-Fe(II) oxygenase family protein	5.46677	3.50737	3.50665	4.16026
AT1G11790	AROGENATE DEHYDRATASE 1 (ADT1)	10.0904	12.3846	6.59863	9.69119
AT1G11800	endonuclease/exonuclease/phosphatase family protein	4.17547	4.52682	3.40347	4.03525
AT1G11820	O-Glycosyl hydrolases family 17 protein	19.6571	17.1098	8.84918	15.2054
AT1G11840	GLYOXALASE I HOMOLOG (GLX1)	66.0876	84.6652	62.9044	71.2191
AT1G11850	transmembrane protein	39.796	24.4326	9.68611	24.6382
AT1G11860	Glycine cleavage T-protein family	1055.73	1033.32	637.236	908.762
AT1G11870	SERYL-TRNA SYNTHETASE (SRS)	18.954	17.601	11.9034	16.1528
AT1G11880	transferases%2C transferring hexosyl groups	3.2144	2.96807	3.25467	3.14571
AT1G11890	SECRETION 22 (SEC22)	25.977	30.42	22.4042	26.267
AT1G11900	Tetratricopeptide repeat (TPR)-like superfamily protein	1.02598	1.09662	1.75835	1.29365
AT1G11905	B-cell receptor-associated protein 31-like protein	5.56511	6.23567	10.359	7.38658
AT1G11910	ASPARTIC PROTEINASE A1 (APA1)	128.67	135.127	134.86	132.886
AT1G11925	Stigma-specific Stig1 family protein	1.81314	1.50785	9.52475	4.28191
AT1G11930	Putative pyridoxal phosphate-dependent enzyme%2C YBL036C type	30.3035	30.5254	38.3833	33.0707
AT1G11940	Core-2/I-branching beta-1%2C6-N-acetylglucosaminyltransferase family protein	1.81631	1.46673	2.20375	1.82893
AT1G11950	Transcription factor jumonji (jmjC) domain-containing protein	4.15288	4.02307	4.33922	4.17172
AT1G11960	ERD (early-responsive to dehydration stress) family protein	76.8128	77.8267	65.8294	73.4896
AT1G12000	Phosphofructokinase family protein	9.56161	11.3281	9.52603	10.1386
AT1G12010	2-oxoglutarate (2OG) and Fe(II)-dependent oxygenase superfamily protein	2.90853	2.17584	2.37507	2.48648
AT1G12020	hypothetical protein	12.5069	15.3471	8.69581	12.1833
AT1G12030	phosphoenolpyruvate carboxylase%2C putative (DUF506)	1.10826	2.99118	2.22786	2.1091
AT1G12050	ATFAH; FAH; FUMARYLACETOACETATE HYDROLASE; SHORT-DAY SENSITIVE CELL DEATHSHORT-DAY SENSITIVE CELL DEATHSHORT-DAY SENSITIVE CELL DEATH 111; SSCD1	9.60524	9.78559	10.2355	9.87543
AT1G12060	BCL-2-ASSOCIATED ATHANOGENE 5 (BAG5)	8.08862	12.4354	4.33096	8.28498
AT1G12080	Vacuolar calcium-binding protein-like protein	14.823	18.231	4.53533	12.5298
AT1G12090	EXTENSIN-LIKE PROTEIN (ELP)	179.965	121.028	313.77	204.921
AT1G12110	NITRATE TRANSPORTER 1.1 (NRT1.1)	48.1632	58.4991	23.7683	43.4769
AT1G12120	hypothetical protein (DUF863)	16.5754	11.3694	20.0942	16.013
AT1G12140	FLAVIN-MONOOXYGENASE GLUCOSINOLATE S-OXYGENASE 5 (FMO GS-OX5)	24.3072	33.0573	26.0618	27.8088
AT1G12200	FLAVIN MONOOXYGENASE (FMO)	6.28521	7.82847	7.21582	7.10983
AT1G12210	RPS5-LIKE 1 (RFL1)	0.835337	1.5708	3.80572	2.07062
AT1G12220	RESISTANT TO P. SYRINGAE 5 (RPS5)	10.5709	12.6256	10.8956	11.364
AT1G12230	Aldolase superfamily protein	20.7926	19.2369	16.2322	18.7539
AT1G12240	(ATBETAFRUCT4)	81.266	87.1425	55.154	74.5209
AT1G12244	Polynucleotidyl transferase%2C ribonuclease H-like superfamily protein	10.4258	8.33239	4.89281	7.88366
AT1G12250	TL20.3	38.409	39.1221	26.4908	34.674
AT1G12270	HOP1 (Hop1)	14.635	15.7825	16.5105	15.6427
AT1G12280	SUPPRESSOR OF MKK1 MKK2 2 (SUMM2)	15.6711	14.1661	8.9362	12.9245
AT1G12290	Disease resistance protein (CC-NBS-LRR class) family	1.04856	1.87317	3.1969	2.03954
AT1G12310	Calcium-binding EF-hand family protein	75.7764	59.8662	60.4012	65.3479
AT1G12320	ankyrin repeat/KH domain protein (DUF1442)	6.15243	6.12755	7.33548	6.53849
AT1G12330	cyclin-dependent kinase-like protein	6.28105	5.52833	3.84766	5.21901
AT1G12340	Cornichon family protein	2.78461	2.23589	2.49418	2.50489
AT1G12350	4-PHOSPHO-PANTO-THENOYLCYSTEINE SYNTHETASE (COAB)	8.95502	7.8787	8.18105	8.33825
AT1G12360	KEULE (KEU)	17.6497	18.9163	29.3398	21.9686
AT1G12370	PHOTOLYASE 1 (PHR1)	7.62426	8.37305	0.634031	5.54378
AT1G12380	hypothetical protein	4.805	4.10102	2.15914	3.68838
AT1G12390	Cornichon family protein	7.01899	5.65831	6.83088	6.50273
AT1G12400	Nucleotide excision repair%2C TFIIH%2C subunit TTDA	5.48782	8.17908	6.89556	6.85415
AT1G12410	CLP PROTEASE PROTEOLYTIC SUBUNIT 2 (CLP2)	84.89	81.9891	73.0891	79.9894
AT1G12420	ACT DOMAIN REPEAT 8 (ACR8)	13.1072	17.26	19.6347	16.6673
AT1G12430	ARMADILLO REPEAT KINESIN 3 (ARK3)	10.4836	9.50768	6.76442	8.91858
AT1G12440	A20/AN1-like zinc finger family protein	75.2636	68.0936	88.5595	77.3056
AT1G12450	SNARE associated Golgi protein family	6.64937	8.59306	8.92647	8.0563
AT1G12460	Leucine-rich repeat protein kinase family protein	4.83237	3.69125	2.3618	3.62847
AT1G12470	zinc ion binding protein	7.29578	7.01662	7.91732	7.40991
AT1G12480	OZONE-SENSITIVE 1 (OZS1)	1.30699	1.9921	1.54732	1.61547
AT1G12500	Nucleotide-sugar transporter family protein	39.376	36.7284	16.0467	30.717
AT1G12520	COPPER CHAPERONE FOR SOD1 (CCS)	66.6212	54.2476	30.1289	50.3326
AT1G12530	hypothetical protein	4.6054	5.30587	4.39841	4.76989
AT1G12550	HYDROXYPYRUVATE REDUCTASE 3 (HPR3)	8.96858	10.4079	5.13263	8.1697
AT1G12580	PHOSPHOENOLPYRUVATE CARBOXYLASE-RELATED KINASE 1 (PEPKR1)	64.2785	71.9369	50.285	62.1668
AT1G12610	DWARF AND DELAYED FLOWERING 1 (DDF1)	168.709	211.442	231.416	203.856
AT1G12620	Pentatricopeptide repeat (PPR) superfamily protein	1.82652	1.54202	1.919	1.76251
AT1G12640	LYSOPHOSPHOLIPID ACYLTRANSFERASE 1 (LPLAT1)	21.2509	21.623	21.6762	21.5167
AT1G12650	rRNA biogenesis RRP36-like protein	10.0084	13.8971	6.73932	10.2149
AT1G12680	PHOSPHOENOLPYRUVATE CARBOXYLASE-RELATED KINASE 2 (PEPKR2)	8.54063	7.98197	9.32262	8.61507
AT1G12700	RNA PROCESSING FACTOR 1 (RPF1)	1.84746	1.12721	1.34329	1.43932
AT1G12710	PHLOEM PROTEIN 2-A12 (PP2-A12)	4.8657	4.91058	6.42283	5.3997
AT1G12730	GPI transamidase subunit PIG-U	0.99167	1.20214	2.61617	1.60333
AT1G12750	RHOMBOID-LIKE PROTEIN 6 (RBL6)	14.0523	9.78872	4.77728	9.53943
AT1G12760	Zinc finger%2C C3HC4 type (RING finger) family protein	48.1017	53.2733	47.4445	49.6065
AT1G12770	EMBRYO DEFECTIVE 1586 (EMB1586)	31.4568	28.3123	24.324	28.031
AT1G12775	Pentatricopeptide repeat (PPR) superfamily protein	1.47465	1.11393	1.21898	1.26919
AT1G12780	UDP-D-GLUCOSE/UDP-D-GALACTOSE 4-EPIMERASE 1 (UGE1)	19.752	17.4618	51.1822	29.4653
AT1G12790	DNA ligase-like protein	1.76677	1.71179	2.58697	2.02184
AT1G12800	S1 DOMAIN-CONTAINING RBP; SDP	95.4012	85.9883	52.5205	77.97
AT1G12810	proline-rich family protein	16.6547	16.3331	17.3193	16.769
AT1G12820	AUXIN SIGNALING F-BOX 3 (AFB3)	21.9915	17.3499	13.2416	17.5277
AT1G12830	nucleolin	14.8994	15.368	11.0837	13.7837
AT1G12840	DE-ETIOLATED 3 (DET3)	56.4181	55.2377	50.1565	53.9374
AT1G12850	Phosphoglycerate mutase family protein	23.8903	19.7149	21.1966	21.6006
AT1G12860	SCREAM 2 (SCRM2)	12.4446	8.96796	7.29348	9.56868
AT1G12880	NUDIX HYDROLASE HOMOLOG 12 (NUDT12)	19.9011	24.914	19.9438	21.5863
AT1G12890	Integrase-type DNA-binding superfamily protein	3.14353	6.89538	6.54186	5.52693
AT1G12900	GLYCERALDEHYDE 3-PHOSPHATE DEHYDROGENASE A SUBUNIT 2 (GAPA-2)	2439.22	2036.68	1043.3	1839.74
AT1G12910	ANTHOCYANIN11 (ATAN11)	24.4224	22.6567	30.376	25.8184
AT1G12920	EUKARYOTIC RELEASE FACTOR 1-2 (ERF1-2)	57.6939	58.6019	39.6613	51.9857
AT1G12930	ARM repeat superfamily protein	5.32567	4.72891	4.63606	4.89688
AT1G12970	PLANT INTRACELLULAR RAS GROUP-RELATED LRR 3 (PIRL3)	4.40172	4.34996	6.65575	5.13581
AT1G12990	beta-1%2C4-N-acetylglucosaminyltransferase family protein	17.4374	34.0734	32.5367	28.0158
AT1G13000	transmembrane protein%2C putative (DUF707)	4.63081	3.16977	9.82277	5.87445
AT1G13020	EUKARYOTIC INITIATION FACTOR 4B2 (EIF4B2)	22.18	24.445	16.3676	20.9975
AT1G13030	sphere organelles protein-like protein	2.00172	2.06029	1.76937	1.94379
AT1G13040	Pentatricopeptide repeat (PPR-like) superfamily protein	1.38194	1.07469	1.42889	1.29517
AT1G13050	proline-rich receptor-like kinase	1.69297	1.83098	1.88525	1.80307
AT1G13060	20S PROTEASOME BETA SUBUNIT E1 (PBE1)	27.1113	28.4038	33.9069	29.8073
AT1G13080	"CYTOCHROME P450, FAMILY 71, SUBFAMILY B, POLYPEPTIDE 2" (CYP71B2)	32.072	50.9255	14.5774	32.525
AT1G13090	"CYTOCHROME P450, FAMILY 71, SUBFAMILY B, POLYPEPTIDE 28" (CYP71B28)	34.2207	49.9917	40.7417	41.6514
AT1G13100	"CYTOCHROME P450, FAMILY 71, SUBFAMILY B, POLYPEPTIDE 29" (CYP71B29)	9.35325	4.73102	5.84341	6.64256
AT1G13110	"CYTOCHROME P450, FAMILY 71 SUBFAMILY B, POLYPEPTIDE 7" (CYP71B7)	58.1297	29.1388	60.3713	49.2133
AT1G13120	nucleoporin GLE1-like protein	5.37002	3.98573	4.527	4.62759
AT1G13145		8.12268	5.09812	5.51878	6.24653
AT1G13160	ARM repeat superfamily protein	7.45474	9.64872	3.96892	7.02412
AT1G13170	OSBP(OXYSTEROL BINDING PROTEIN)-RELATED PROTEIN 1D (ORP1D)	7.19	4.89079	4.92835	5.66971
AT1G13180	DISTORTED TRICHOMES 1 (DIS1)	1.91406	1.74674	4.31871	2.65983
AT1G13190	RNA-binding (RRM/RBD/RNP motifs) family protein	25.4911	29.0873	33.729	29.4358
AT1G13195	RING/U-box superfamily protein	9.32142	11.1075	8.69538	9.70811
AT1G13210	AUTOINHIBITED CA2+/ATPASE II (ACA.l)	61.0645	34.9554	89.744	61.9213
AT1G13220	LITTLE NUCLEI2 (LINC2)	5.39712	5.55356	5.75648	5.56905
AT1G13245	ROTUNDIFOLIA LIKE 17 (RTFL17)	57.6471	49.1792	39.3093	48.7119
AT1G13250	GALACTURONOSYLTRANSFERASE-LIKE 3 (GATL3)	9.32072	9.5615	5.22208	8.03476
AT1G13260	RELATED TO ABI3/VP1 1 (RAV1)	87.4265	97.5536	111.044	98.6748
AT1G13270	METHIONINE AMINOPEPTIDASE 1B (MAP1C)	21.5154	15.3916	18.086	18.331
AT1G13280	ALLENE OXIDE CYCLASE 4 (AOC4)	11.9282	13.2126	13.5983	12.913
AT1G13320	PROTEIN PHOSPHATASE 2A SUBUNIT A3 (PP2AA3)	16.139	17.4632	17.7063	17.1028
AT1G13340	Regulator of Vps4 activity in the MVB pathway protein	13.8755	43.2011	176.053	77.7099
AT1G13350	Protein kinase superfamily protein	12.3949	12.1471	9.85072	11.4642
AT1G13360	hypothetical protein	45.9057	46.1368	56.6108	49.5511
AT1G13380	sodium/hydrogen exchanger (DUF1218)	24.0237	19.8113	15.7962	19.8771
AT1G13390	translocase subunit seca	26.5134	21.5205	29.9849	26.0063
AT1G13440	GLYCERALDEHYDE-3-PHOSPHATE DEHYDROGENASE C2 (GAPC2)	670.735	931.176	420.594	674.168
AT1G13450	GT-1 (GT-1)	12.3642	11.7472	19.2707	14.4607
AT1G13460	TRUE	6.56538	3.61617	4.99913	5.06023
AT1G13470	hypothetical protein (DUF1262)	8.33971	30.365	72.0289	36.9112
AT1G13520	hypothetical protein (DUF1262)	0.247443	2.01522	6.41544	2.8927
AT1G13560	AMINOALCOHOLPHOSPHOTRANSFERASE 1 (AAPT1)	29.6887	28.2183	22.8446	26.9172
AT1G13570	F-box/RNI-like superfamily protein	6.83463	6.13111	10.5424	7.83605
AT1G13580	LAG1 LONGEVITY ASSURANCE HOMOLOG 3 (LAG13)	2.9564	2.83718	2.45531	2.74963
AT1G13609	Defensin-like (DEFL) family protein	62.6183	37.7713	96.8984	65.7627
AT1G13640	Phosphatidylinositol 3- and 4-kinase family protein	42.069	37.8854	25.1947	35.0497
AT1G13650	hypothetical protein	26.17	36.1455	10.0995	24.1384
AT1G13690	ATPASE E1 (ATE1)	9.11592	9.04252	9.20809	9.12217
AT1G13700	6-PHOSPHOGLUCONOLACTONASE 1 (PGL1)	3.89987	11.0445	12.7692	9.23787
AT1G13730	Nuclear transport factor 2 (NTF2) family protein with RNA binding (RRM-RBD-RNP motifs) domain-containing protein	11.1853	9.79875	4.30881	8.43094
AT1G13740	ABI FIVE BINDING PROTEIN 2 (AFP2)	7.24198	5.34539	5.05111	5.87949
AT1G13750	Purple acid phosphatases superfamily protein	4.00873	5.27407	9.14789	6.14357
AT1G13770	ROOT UV-B SENSITIVE 3 (RUS3)	4.16208	3.29152	3.86598	3.77319
AT1G13780	F-box/RNI-like/FBD-like domains-containing protein	4.75185	4.10457	3.70017	4.18553
AT1G13790	FACTOR OF DNA METHYLATION 4 (FDM4)	1.83943	2.01214	1.99202	1.94786
AT1G13810	Restriction endonuclease%2C type II-like superfamily protein	4.67754	6.84558	3.12047	4.8812
AT1G13820	alpha/beta-Hydrolases superfamily protein	29.7852	29.5881	22.3871	27.2535
AT1G13860	QUASIMODO2 LIKE 1 (QUL1)	4.92911	4.50519	3.73544	4.38991
AT1G13870	DEFORMED ROOTS AND LEAVES 1 (DRL1)	10.4072	10.2713	9.26549	9.98134
AT1G13880	ELM2	16.4261	20.412	20.0066	18.9483
AT1G13900	PURPLE ACID PHOSPHATASE 2 (PAP2)	14.0455	11.6206	12.3563	12.6742
AT1G13910	Leucine-rich repeat (LRR) family protein	1.28583	1.04001	0.963757	1.09653
AT1G13920	Remorin family protein	3.01968	2.61116	2.1846	2.60515
AT1G13930	oleosin-B3-like protein	77.8121	140.922	107.894	108.876
AT1G13940	T-box transcription factor%2C putative (DUF863)	6.52966	4.66317	6.66795	5.95359
AT1G13950	EUKARYOTIC ELONGATION FACTOR 5A-1 (ELF5A-1)	12.7058	9.37155	8.02037	10.0326
AT1G13960	WRKY DNA-BINDING PROTEIN 4 (WRKY4)	12.0993	10.2934	15.8045	12.7324
AT1G13980	GNOM (GN)	11.703	8.20517	12.9361	10.9481
AT1G13990	plant/protein	6.24431	12.5573	61.7809	26.8608
AT1G14000	VH1-INTERACTING KINASE (VIK)	25.7006	31.2069	30.3765	29.0946
AT1G14010	emp24/gp25L/p24 family/GOLD family protein	11.188	13.0568	22.3142	15.5197
AT1G14020	O-fucosyltransferase family protein	5.83806	3.89852	4.42399	4.72019
AT1G14030	LYSINE METHYLTRANSFERASE (LSMT)-LIKE (LSMT-L)	20.8816	17.988	14.1653	17.6783
AT1G14060	GCK domain-containing protein	6.05955	11.8067	9.38921	9.08515
AT1G14070	FUCOSYLTRANSFERASE 7 (FUT7)	2.02089	1.3023	2.0201	1.7811
AT1G14090		1.23591	1.75124	1.77608	1.58775
AT1G14130	ATDAO; DAO1; DIOXYGENASE FOR AUXIN OXIDATION 1	4.94162	5.86688	5.45772	5.42207
AT1G14140	UNCOUPLING PROTEIN 3 (UCP3)	8.20945	7.5579	6.37762	7.38166
AT1G14150	PHOTOSYNTHETIC NDH SUBCOMPLEX L 2 (PnsL2)	147.012	151.078	99.2444	132.445
AT1G14170	RNA-binding KH domain-containing protein	4.99892	2.06044	7.73955	4.93297
AT1G14180	RING/U-box superfamily protein	2.04588	1.26521	0.889332	1.40014
AT1G14200	RING/U-box superfamily protein	32.4337	73.9984	28.0846	44.8389
AT1G14205	Ribosomal L18p/L5e family protein	2.55156	6.80932	2.25014	3.87034
AT1G14210	Ribonuclease T2 family protein	13.3391	13.8587	5.22231	10.8067
AT1G14230	GDA1/CD39 nucleoside phosphatase family protein	7.95138	5.90341	8.35052	7.40177
AT1G14250	GDA1/CD39 nucleoside phosphatase family protein	1.48615	2.32337	8.2965	4.03534
AT1G14270	CAAX amino terminal protease family protein	35.1876	32.7297	23.6433	30.5202
AT1G14280	PHYTOCHROME KINASE SUBSTRATE 2 (PKS2)	40.9158	38.7911	21.3026	33.6699
AT1G14290	SPHINGOID BASE HYDROXYLASE 2 (SBH2)	25.0075	16.3823	17.0475	19.4791
AT1G14300	ARM repeat superfamily protein	4.38413	4.49316	5.52724	4.80151
AT1G14310	Haloacid dehalogenase-like hydrolase (HAD) superfamily protein	5.34542	5.17723	5.74509	5.42258
AT1G14320	SUPPRESSOR OF ACAULIS 52 (SAC52)	259.869	308.785	181.868	250.174
AT1G14330	Galactose oxidase/kelch repeat superfamily protein	8.59653	11.113	15.0588	11.5894
AT1G14340	RNA-binding (RRM/RBD/RNP motifs) family protein	12.681	11.6781	12.0231	12.1274
AT1G14345	NAD(P)-linked oxidoreductase superfamily protein	232.996	221.71	103.379	186.028
AT1G14350	FOUR LIPS (FLP)	8.73897	6.32685	3.38178	6.1492
AT1G14360	UDP-GALACTOSE TRANSPORTER 3 (UTR3)	6.8557	14.1673	24.7171	15.2467
AT1G14370	PROTEIN KINASE 2A (APK2A)	19.087	23.8652	41.6818	28.2113
AT1G14380	IQ-DOMAIN 28 (IQD28)	9.37622	8.04308	9.92183	9.11371
AT1G14400	UBIQUITIN CARRIER PROTEIN 1 (UBC1)	76.0908	66.7036	82.4609	75.0851
AT1G14410	WHIRLY 1 (WHY1)	9.68184	8.55187	8.42828	8.88733
AT1G14440	HOMEOBOX PROTEIN 31 (HB31)	1.62745	1.98723	1.85338	1.82268
AT1G14450	NADH dehydrogenase (ubiquinone)s	29.6761	28.8484	29.4332	29.3193
AT1G14460	AAA-type ATPase family protein	4.19718	3.36612	4.10957	3.89096
AT1G14470	Pentatricopeptide repeat (PPR) superfamily protein	0.71766	1.00328	1.29213	1.00436
AT1G14480	Ankyrin repeat family protein	18.1251	16.1408	17.2274	17.1644
AT1G14510	ALFIN-LIKE 7 (AL7)	18.0491	16.8452	20.5925	18.4956
AT1G14520	MYO-INOSITOL OXYGENASE 1 (MIOX1)	1.9122	2.2319	6.65125	3.59845
AT1G14530	TOM THREE HOMOLOG 1 (THH1)	3.09561	3.49266	3.43983	3.3427
AT1G14540	PEROXIDASE 4 (PER4)	37.2205	30.9764	34.4342	34.2103
AT1G14560	Mitochondrial substrate carrier family protein	8.39972	8.27687	7.71891	8.13183
AT1G14570	ATPUX7; PLANT UBX DOMAIN-CONTAINING PROTEIN 7; PUX7	13.2006	12.6745	14.3081	13.3944
AT1G14580	BLJ; BLUEJAY	5.08665	6.63815	4.21256	5.31245
AT1G14590	Nucleotide-diphospho-sugar transferase family protein	6.03328	4.79644	4.21775	5.01582
AT1G14600	Homeodomain-like superfamily protein	1.97417	2.88371	2.01245	2.29011
AT1G14610	TWIN 2 (TWN2)	19.5361	22.542	16.6557	19.5779
AT1G14620	DECOY (DECOY)	4.55968	5.41061	4.04653	4.67227
AT1G14640	SWAP (Suppressor-of-White-APricot)/surp domain-containing protein	2.38966	2.1239	3.67401	2.72919
AT1G14642	hypothetical protein	0.655834	0.564214	2.0838	1.10128
AT1G14650	SWAP (Suppressor-of-White-APricot)/surp domain-containing protein / ubiquitin family protein	24.5577	23.7061	24.6662	24.31
AT1G14660	NA+/H+ EXCHANGER 8 (NHX8)	1.3746	1.05117	1.3009	1.24223
AT1G14670	Endomembrane protein 70 protein family	39.8677	39.7051	46.3185	41.9638
AT1G14685	BASIC PENTACYSTEINE 2 (BPC2)	12.2006	13.7197	16.1239	14.0147
AT1G14687	HOMEOBOX PROTEIN 32 (HB32)	2.42659	2.31955	1.82757	2.19123
AT1G14690	MICROTUBULE-ASSOCIATED PROTEIN 65-7 (MAP65-7)	17.0896	18.6108	13.8529	16.5178
AT1G14700	PURPLE ACID PHOSPHATASE 3 (PAP3)	9.28858	7.25602	3.36393	6.63618
AT1G14710	hydroxyproline-rich glycoprotein family protein	20.1166	19.2943	15.3596	18.2568
AT1G14720	XYLOGLUCAN ENDOTRANSGLUCOSYLASE/HYDROLASE 28 (XTH28)	20.1189	18.3625	19.0565	19.1793
AT1G14730	Cytochrome b561/ferric reductase transmembrane protein family	1.9123	2.11875	0.810131	1.61373
AT1G14740	TITANIA 1 (TTA1)	97.3128	113.745	121.95	111.003
AT1G14770	RING/FYVE/PHD zinc finger superfamily protein	2.09772	1.84227	2.08286	2.00762
AT1G14780	MAC/Perforin domain-containing protein	0.609907	0.858005	2.55458	1.34083
AT1G14790	RNA-DEPENDENT RNA POLYMERASE 1 (RDR1)	3.37887	4.2244	8.11146	5.23824
AT1G14810	semialdehyde dehydrogenase family protein	40.5161	37.0842	23.3473	33.6492
AT1G14820	Sec14p-like phosphatidylinositol transfer family protein	8.78388	5.79635	6.7233	7.10118
AT1G14830	DYNAMIN-LIKE 1C (DL1C)	17.874	17.2509	19.0048	18.0432
AT1G14840	MICROTUBULE-ASSOCIATED PROTEINS 70-4 (MAP70-4)	11.9583	10.8298	4.70046	9.16285
AT1G14850	NUCLEOPORIN 155 (NUP155)	5.58958	5.7501	5.41254	5.58408
AT1G14860	NUDIX HYDROLASE HOMOLOG 18 (NUDT18)	2.81381	2.93151	4.48386	3.40973
AT1G14870	PLANT CADMIUM RESISTANCE 2 (PCR2)	18.1202	22.0569	91.4202	43.8658
AT1G14880	PLANT CADMIUM RESISTANCE 1 (PCR1)	44.3745	109.537	512.699	222.203
AT1G14890	Plant invertase/pectin methylesterase inhibitor superfamily protein	7.98152	8.88996	11.3691	9.41351
AT1G14900	HIGH MOBILITY GROUP A (HMGA)	3.74255	3.41917	4.26544	3.80905
AT1G14910	ENTH/ANTH/VHS superfamily protein	8.52782	8.0397	12.4198	9.66245
AT1G14920	GIBBERELLIC ACID INSENSITIVE (GAI)	10.9077	7.84441	15.8764	11.5428
AT1G14970	O-fucosyltransferase family protein	1.61827	1.44845	1.24649	1.43774
AT1G14980	CHAPERONIN 10 (CPN10)	29.106	72.2628	35.9986	45.7892
AT1G14990	transmembrane protein	6.57774	6.56391	5.82315	6.3216
AT1G15000	SERINE CARBOXYPEPTIDASE-LIKE 50 (scpl50)	13.2629	14.958	10.5247	12.9152
AT1G15010	mediator of RNA polymerase II transcription subunit	442.218	585.928	724.573	584.24
AT1G15020	QUIESCIN-SULFHYDRYL OXIDASE 1 (QSOX1)	7.41026	4.11638	8.81572	6.78079
AT1G15030	hypothetical protein (DUF789)	33.8144	29.7447	21.861	28.4733
AT1G15060	alpha/beta hydrolase family protein	15.6165	16.7479	9.81613	14.0601
AT1G15080	LIPID PHOSPHATE PHOSPHATASE 2 (LPP2)	2.57706	1.73287	0.873405	1.72778
AT1G15100	RING-H2 FINGER A2A (RHA2A)	28.1178	18.0853	8.2452	18.1495
AT1G15110	PHOSPHATIDYLSERINE SYNTHASE 1 (PSS1)	1.71736	2.00959	1.31838	1.68177
AT1G15120	Ubiquinol-cytochrome C reductase hinge protein	51.6081	51.1771	51.4669	51.4174
AT1G15125	S-adenosyl-L-methionine-dependent methyltransferases superfamily protein	17.0973	3.72785	61.8241	27.5497
AT1G15130	Endosomal targeting BRO1-like domain-containing protein	23.7978	21.4733	35.4339	26.9017
AT1G15140	FAD/NAD(P)-binding oxidoreductase	73.3069	62.511	43.6567	59.8249
AT1G15160	MATE efflux family protein	4.56962	4.27397	1.89122	3.57827
AT1G15165	RING/FYVE/PHD zinc finger superfamily protein	3.4955	3.19023	1.73838	2.80804
AT1G15170	MATE efflux family protein	13.5891	12.3663	6.71532	10.8902
AT1G15175		3.19129	2.31379	3.85184	3.11897
AT1G15180	MATE efflux family protein	32.5988	29.6118	15.3004	25.837
AT1G15200	protein-protein interaction regulator family protein	16.5908	19.7109	17.0182	17.7733
AT1G15210	ATP-BINDING CASSETTE G35 (ABCG35)	1.3512	1.07855	1.63466	1.3548
AT1G15215	SAWADEE HOMEODOMAIN HOMOLOG 1 (SHH1)	2.34476	1.70201	2.46784	2.17154
AT1G15220	(CCMH)	4.99783	4.0829	4.64772	4.57615
AT1G15230	hypothetical protein	18.0227	20.8354	21.5582	20.1388
AT1G15240	phox (PX) domain-containing protein	10.5419	9.63816	11.4088	10.5296
AT1G15250	Zinc-binding ribosomal protein family protein	8.88651	15.4446	9.92515	11.4188
AT1G15260	LOW protein: ATP-dependent RNA helicase-like protein	38.8582	27.4926	14.4729	26.9412
AT1G15270	Translation machinery associated TMA7	90.4777	94.6508	96.6061	93.9116
AT1G15280	CASC3/Barentsz eIF4AIII binding protein	15.7436	16.5916	13.5061	15.2804
AT1G15290	Tetratricopeptide repeat (TPR)-like superfamily protein	69.5666	66.6803	30.0787	55.4419
AT1G15340	METHYL-CPG-BINDING DOMAIN 10 (MBD10)	60.7551	78.3185	50.1134	63.0623
AT1G15350	DUF4050 family protein	11.4955	7.22529	10.045	9.58861
AT1G15370	SNARE-like superfamily protein	16.8086	21.3259	15.4705	17.8683
AT1G15390	PEPTIDE DEFORMYLASE 1A (PDF1A)	22.6364	21.2152	14.8529	19.5682
AT1G15400	hypothetical protein	25.7135	29.851	31.1615	28.9087
AT1G15405		50.8586	10.295	89.2465	50.1334
AT1G15410	aspartate-glutamate racemase family	20.4778	15.184	6.94023	14.2007
AT1G15420	LANT-SPECIFIC COMPONENT OF THE PRE- RRNA PROCESSING COMPLEX1; PCP1	7.69738	8.92335	6.64331	7.75468
AT1G15430	hypothetical protein (DUF1644)	21.7191	35.6466	30.9675	29.4444
AT1G15440	PERIODIC TRYPTOPHAN PROTEIN 2 (PWP2)	3.53028	4.73849	3.24117	3.83665
AT1G15470	Transducin/WD40 repeat-like superfamily protein	6.23891	5.63305	4.2263	5.36609
AT1G15480	Tetratricopeptide repeat (TPR)-like superfamily protein	1.07055	1.01794	1.87381	1.32077
AT1G15490	alpha/beta-Hydrolases superfamily protein	3.96049	2.8632	2.89509	3.23959
AT1G15500	(ATNTT2)	83.9637	86.5564	51.8855	74.1352
AT1G15510	EARLY CHLOROPLAST BIOGENESIS2 (ECB2)	3.79242	3.46728	2.48998	3.24989
AT1G15520	ATP-BINDING CASSETTE G40 (ABCG40)	0.635811	1.82652	9.23919	3.90051
AT1G15530	Concanavalin A-like lectin protein kinase family protein	16.1772	13.0488	12.455	13.8937
AT1G15550	GIBBERELLIN 3-OXIDASE 1 (GA3OX1)	4.69801	10.2587	3.54233	6.16636
AT1G15580	INDOLE-3-ACETIC ACID INDUCIBLE 5 (IAA5)	1.96632	1.8044	2.11032	1.96035
AT1G15660	CENTROMERE PROTEIN C (CENP-C)	2.3256	1.63532	2.40833	2.12309
AT1G15670	Galactose oxidase/kelch repeat superfamily protein	1.84477	3.22838	11.8632	5.64544
AT1G15690	(AVP1)	485.327	478.909	240.148	401.461
AT1G15700	(ATPC2)	3.93107	5.54465	4.46566	4.64713
AT1G15710	prephenate dehydrogenase family protein	17.6379	22.5567	9.9784	16.7243
AT1G15720	TRF-LIKE 5 (TRFL5)	2.09131	1.82772	1.01254	1.64386
AT1G15730	Cobalamin biosynthesis CobW-like protein	31.5869	30.164	26.7393	29.4967
AT1G15740	Leucine-rich repeat family protein	40.3725	43.7604	62.5568	48.8966
AT1G15750	TOPLESS (TPL)	64.5893	57.0705	55.1919	58.9506
AT1G15760	Sterile alpha motif (SAM) domain-containing protein	3.70562	3.35935	1.01282	2.6926
AT1G15780	MED15_1; MEDIATOR 15_1; NON-RECOGNITION-OF-BTH 4; NRB4	11.2001	11.1115	13.3954	11.9023
AT1G15790	mediator of RNA polymerase II transcription subunit 15a-like protein	1.70588	3.50397	11.9663	5.7254
AT1G15800	hypothetical protein	2.97846	2.38995	4.98799	3.45213
AT1G15810	S15/NS1%2C RNA-binding protein	9.62949	10.4428	8.80533	9.62588
AT1G15820	LIGHT HARVESTING COMPLEX PHOTOSYSTEM II SUBUNIT 6 (LHCB6)	3253.76	3265.58	2470.31	2996.55
AT1G15825	hydroxyproline-rich glycoprotein family protein	22.2596	44.2723	14.4892	27.0071
AT1G15830	hypothetical protein	17.9237	33.0679	12.0855	21.0257
AT1G15860	defective in cullin neddylation protein (DUF298)	11.8564	13.4136	10.7762	12.0154
AT1G15880	GOLGI SNARE 11 (GOS11)	26.6871	22.0247	32.1774	26.9631
AT1G15885	hypothetical protein	10.7162	8.7653	7.54723	9.00957
AT1G15890	Disease resistance protein (CC-NBS-LRR class) family	7.95089	7.81321	8.74177	8.16863
AT1G15910	FACTOR OF DNA METHYLATION 1 (FDM1)	12.0241	9.31981	7.01432	9.45274
AT1G15920	Polynucleotidyl transferase%2C ribonuclease H-like superfamily protein	11.6575	11.3567	12.1014	11.7052
AT1G15930	Ribosomal protein L7Ae/L30e/S12e/Gadd45 family protein	98.6937	104.755	55.226	86.2247
AT1G15940	ATPDS5E; PDS5E	7.33403	9.4353	7.49493	8.08809
AT1G15950	CINNAMOYL COA REDUCTASE 1 (CCR1)	55.2195	68.8839	21.661	48.5882
AT1G15960	NRAMP METAL ION TRANSPORTER 6 (NRAMP6)	7.97621	8.18425	4.43926	6.86657
AT1G15970	DNA glycosylase superfamily protein	9.44941	8.54685	5.96244	7.98624
AT1G15980	PHOTOSYNTHETIC NDH SUBCOMPLEX B 1 (PnsB1)	197.269	210.214	130.616	179.366
AT1G16000	GAG1At protein	6.33788	7.62338	9.69584	7.8857
AT1G16010	MAGNESIUM TRANSPORTER 2 (MGT2)	20.8082	18.6472	23.7434	21.0662
AT1G16020	CALCIUM CAFFEINE ZINC SENSITIVITY 1A; CCZ1A	9.16238	6.36605	4.72162	6.75002
AT1G16030	HEAT SHOCK PROTEIN 70B (Hsp70b)	2.31203	14.9984	2.54134	6.61726
AT1G16040	phosphatidylinositol-glycan biosynthesis class F-like protein	2.77306	3.00293	3.86119	3.21239
AT1G16060	ARIA-INTERACTING DOUBLE AP2 DOMAIN PROTEIN (ADAP)	1.14979	1.90075	1.4422	1.49758
AT1G16080	nuclear protein	144	168.447	108.382	140.276
AT1G16090	WALL ASSOCIATED KINASE-LIKE 7 (WAKL7)	7.44732	6.51372	10.3327	8.0979
AT1G16110	WALL ASSOCIATED KINASE-LIKE 6 (WAKL6)	15.0999	20.7848	22.0375	19.3074
AT1G16130	WALL ASSOCIATED KINASE-LIKE 2 (WAKL2)	38.7657	34.7881	21.5383	31.6974
AT1G16170	ephrin-A3 protein	33.2932	24.0552	23.3141	26.8875
AT1G16180	Serinc-domain containing serine and sphingolipid biosynthesis protein	77.6635	80.4347	104.615	87.5711
AT1G16190	RADIATION SENSITIVE23A (RAD23A)	9.30931	8.72659	6.49818	8.17803
AT1G16210	coiled-coil protein	53.3849	58.4526	51.2489	54.3621
AT1G16220	Protein phosphatase 2C family protein	1.32116	1.07619	1.36275	1.25336
AT1G16240	SYNTAXIN OF PLANTS 51 (SYP51)	40.6238	41.8656	55.7309	46.0734
AT1G16250	Galactose oxidase/kelch repeat superfamily protein	6.67024	8.16239	8.92807	7.92023
AT1G16260	Wall-associated kinase family protein	30.6123	35.9214	28.4801	31.6713
AT1G16270	kinase superfamily with octicosapeptide/Phox/Bem1p domain-containing protein	10.9637	12.4576	10.6791	11.3668
AT1G16280	RNA HELICASE 36 (RH36)	3.84673	3.91294	3.05942	3.60636
AT1G16300	GLYCERALDEHYDE-3-PHOSPHATE DEHYDROGENASE OF PLASTID 2 (GAPCP-2)	1.19755	1.23504	0.949503	1.12736
AT1G16310	Cation efflux family protein	1.96229	2.61987	1.63536	2.07251
AT1G16320	plant/protein (DUF2358)	95.2468	95.5531	39.1664	76.6554
AT1G16340	(ATKDSA2)	2.81954	2.37077	2.47543	2.55525
AT1G16350	Aldolase-type TIM barrel family protein	16.9519	22.449	18.786	19.3956
AT1G16370	ORGANIC CATION/CARNITINE TRANSPORTER 6 (OCT6)	45.3014	52.6778	21.3983	39.7925
AT1G16400	"CYTOCHROME P450, FAMILY 79, SUBFAMILY F, POLYPEPTIDE 2" (CYP79F2)	2.45279	5.10401	5.19554	4.25078
AT1G16410	CYTOCHROME P450 79F1 (CYP79F1)	36.5377	103.184	64.3642	68.0288
AT1G16420	METACASPASE 8 (MC8)	13.4748	11.0091	12.2427	12.2422
AT1G16430	Surfeit locus protein 5 subunit 22 of Mediator complex	5.18234	3.74456	3.00796	3.97829
AT1G16445	S-adenosyl-L-methionine-dependent methyltransferases superfamily protein	2.41226	1.94513	1.07253	1.80997
AT1G16460	RHODANESE HOMOLOGUE 2 (RDH2)	20.8212	21.3365	18.6722	20.2767
AT1G16470	PROTEASOME SUBUNIT PAB1 (PAB1)	16.0598	13.8199	17.2977	15.7258
AT1G16500	filamentous hemagglutinin transporter	5.00404	1.53553	6.67034	4.40331
AT1G16510	SAUR41; SMALL AUXIN UPREGULATED 41	3.58979	4.59654	13.8993	7.36188
AT1G16520	interactor of constitutive active ROPs protein	6.12189	5.8085	5.09735	5.67591
AT1G16530	ASYMMETRIC LEAVES 2-LIKE 9 (ASL9)	1.73099	1.43401	1.18146	1.44882
AT1G16540	ABA DEFICIENT 3 (ABA3)	1.50782	1.20378	2.2996	1.6704
AT1G16550		2.5446	2.19365	0.964175	1.90081
AT1G16560	Per1-like family protein	19.3188	17.1676	23.0937	19.86
AT1G16570	UDP-Glycosyltransferase superfamily protein	3.83969	3.09273	4.48733	3.80658
AT1G16590	(REV7)	3.13079	2.43579	3.09094	2.88584
AT1G16610	ARGININE/SERINE-RICH 45 (SR45)	10.3625	13.5962	12.0073	11.9887
AT1G16640	AP2/B3-like transcriptional factor family protein	3.04141	1.72559	1.55171	2.10624
AT1G16650	S-adenosyl-L-methionine-dependent methyltransferases superfamily protein	2.62706	1.91064	1.89436	2.14402
AT1G16670	COLD-RESPONSIVE PROTEIN KINASE 1; CRPK1	9.79166	15.9599	18.9757	14.9091
AT1G16680	Chaperone DnaJ-domain superfamily protein	8.45688	7.34649	6.79564	7.533
AT1G16690	Enhancer of polycomb-like transcription factor protein	2.10327	1.59278	1.50524	1.73376
AT1G16700	Alpha-helical ferredoxin	23.0459	24.2307	23.0098	23.4288
AT1G16710	HISTONE ACETYLTRANSFERASE OF THE CBP FAMILY 12 (HAC12)	7.61271	6.04696	8.14349	7.26772
AT1G16720	HIGH CHLOROPHYLL FLUORESCENCE PHENOTYPE 173 (HCF173)	237.929	228.287	123.697	196.638
AT1G16730	UNKNOWN PROTEIN 6 (UP6)	29.8124	37.422	8.97467	25.403
AT1G16740	Ribosomal protein L20	11.6445	11.0158	8.89067	10.517
AT1G16750	GPI-anchored adhesin-like protein%2C putative (Protein of unknown function%2C DUF547)	4.39567	2.649	2.52369	3.18946
AT1G16780	(VHP2;2)	2.36933	1.7071	1.78166	1.9527
AT1G16790	ribosomal protein-like protein	6.14957	6.41848	5.49209	6.02005
AT1G16800	P-loop containing nucleoside triphosphate hydrolases superfamily protein	1.15463	1.16585	0.838996	1.05316
AT1G16810	7-dehydrocholesterol reductase-like protein	27.1878	25.9832	33.6696	28.9469
AT1G16820	vacuolar ATP synthase catalytic subunit-related / V-ATPase-related / vacuolar proton pump-like protein	1.36216	1.15266	1.74067	1.4185
AT1G16825	Reticulon family protein	2.32051	2.23082	2.32191	2.29108
AT1G16840	hypothetical protein	27.642	25.0209	42.7964	31.8197
AT1G16850	transmembrane protein	9.90737	7.75745	5.65708	7.77396
AT1G16870	mitochondrial 28S ribosomal protein S29-like protein	8.92637	7.63794	7.34291	7.96907
AT1G16880	ACT DOMAIN REPEATS 11 (ACR11)	236.411	220.653	173.123	210.063
AT1G16890	UBIQUITIN-CONJUGATING ENZYME 36 (UBC36)	39.821	40.7388	48.3448	42.9682
AT1G16900	EMS-MUTAGENIZED BRI1 SUPPRESSOR 3 (EBS3)	4.09526	3.69442	5.78311	4.52426
AT1G16916	transmembrane protein	12.9008	8.68258	10.0384	10.5406
AT1G16920	RAB GTPASE HOMOLOG A1B (RABA1b)	17.1946	12.5256	10.264	13.3281
AT1G16930	F-box/RNI-like/FBD-like domains-containing protein	3.10377	3.04778	2.82901	2.99352
AT1G16960	Ubiquitin domain-containing protein	5.96515	7.45258	6.53504	6.65092
AT1G16970	KU70 HOMOLOG (KU70)	2.12622	2.62971	2.92287	2.5596
AT1G17040	SH2 DOMAIN PROTEIN A (SHA)	2.6337	2.13322	2.1222	2.29637
AT1G17050	SOLANESYL DIPHOSPHATE SYNTHASE 2 (SPS2)	91.3346	128.704	28.252	82.7636
AT1G17060	CYTOCHROME P450 72C1 (CYP72C1)	2.31826	2.37339	2.21205	2.30123
AT1G17070	GC-rich sequence DNA-binding factor-like protein with Tuftelin interacting domain-containing protein	3.54301	3.80531	4.98076	4.10969
AT1G17080	Ribosomal protein L18ae family	39.8809	42.9064	43.8171	42.2015
AT1G17090	transmembrane protein	3.25933	1.51568	1.73159	2.16887
AT1G17100	SOUL heme-binding family protein	227.068	329.315	88.2981	214.894
AT1G17110	UBIQUITIN-SPECIFIC PROTEASE 15 (UBP15)	14.6492	12.1021	14.3064	13.6859
AT1G17120	CATIONIC AMINO ACID TRANSPORTER 8 (CAT8)	25.3501	21.1365	23.4035	23.2967
AT1G17130	coiled-coil protein (DUF572)	11.4906	11.5268	10.8606	11.2927
AT1G17140	INTERACTOR OF CONSTITUTIVE ACTIVE ROPS 1 (ICR1)	27.7683	14.248	12.2706	18.0956
AT1G17145	RING/U-box superfamily protein	9.25586	9.33066	10.6088	9.73179
AT1G17147	VQ motif-containing protein	14.2703	4.54295	16.7784	11.8639
AT1G17160	RBSK; RIBOKINASE	10.8013	7.75877	15.8858	11.4819
AT1G17170	GLUTATHIONE S-TRANSFERASE TAU 24 (GSTU24)	0.914543	2.05612	1.54976	1.50681
AT1G17190	GLUTATHIONE S-TRANSFERASE TAU 26 (GSTU26)	1.73473	1.60584	1.21195	1.5175
AT1G17200	CASP-LIKE PROTEIN 2A1; CASPL2A1	18.5984	16.7821	12.9597	16.1134
AT1G17210	IAP-LIKE PROTEIN 1 (ILP1)	30.609	30.0935	22.122	27.6082
AT1G17220	FU-GAERI1 (FUG1)	168.145	148.123	92.9385	136.402
AT1G17230	Leucine-rich receptor-like protein kinase family protein	4.25881	5.47492	3.51802	4.41725
AT1G17270	O-fucosyltransferase family protein	2.54568	2.33947	2.42181	2.43565
AT1G17280	UBIQUITIN-CONJUGATING ENZYME 34 (UBC34)	10.4707	11.2583	11.1232	10.9508
AT1G17290	ALANINE AMINOTRANSFERAS (AlaAT1)	56.5335	64.7481	100.895	74.0589
AT1G17330	Metal-dependent phosphohydrolase	8.89622	7.64257	11.2744	9.27106
AT1G17340	SAC5; SUPPRESSOR OF ACTIN 5	18.936	20.5004	22.588	20.6748
AT1G17350	NADH:ubiquinone oxidoreductase intermediate-associated protein 30	2.79782	2.24338	1.6801	2.24043
AT1G17360	LOW protein: protein phosphatase 1 regulatory subunit-like protein	59.6446	58.2753	33.8129	50.5776
AT1G17370	OLIGOURIDYLATE BINDING PROTEIN 1B (UBP1B)	26.2684	31.1228	20.8101	26.0671
AT1G17380	JASMONATE-ZIM-DOMAIN PROTEIN 5 (JAZ5)	93.3708	123.053	137.324	117.916
AT1G17410	Nucleoside diphosphate kinase family protein	7.59346	9.42416	6.51821	7.84528
AT1G17420	LIPOXYGENASE 3 (LOX3)	294.347	355.989	294.528	314.955
AT1G17430	alpha/beta-Hydrolases superfamily protein	4.79206	4.30185	8.91489	6.00293
AT1G17440	ENHANCED ETHYLENE RESPONSE 4 (EER4)	19.5353	24.3525	20.7873	21.5584
AT1G17450	B-block binding subunit of TFIIIC	1.97699	1.65417	2.62501	2.08539
AT1G17455	ELF4-LIKE 4 (ELF4-L4)	3.8758	2.31955	5.83013	4.00849
AT1G17470	DEVELOPMENTALLY REGULATED G-PROTEIN 1 (DRG1)	29.5024	25.2495	18.1828	24.3116
AT1G17480	IQ-DOMAIN 7 (IQD7)	1.61235	1.06345	1.29782	1.32454
AT1G17490	epidermal patterning factor-like protein	11.0684	12.1944	14.9012	12.7213
AT1G17500	ATPase E1-E2 type family protein / haloacid dehalogenase-like hydrolase family protein	6.90097	5.79618	11.2394	7.97886
AT1G17510	hypothetical protein	3.97406	3.8851	5.35686	4.40534
AT1G17520	Homeodomain-like/winged-helix DNA-binding family protein	4.51345	4.97986	5.39423	4.96251
AT1G17530	TRANSLOCASE OF INNER MITOCHONDRIAL MEMBRANE 23 (TIM23-1)	26.3434	33.3634	38.2334	32.6467
AT1G17550	HOMOLOGY TO ABI2 (HAB2)	27.1002	30.715	27.4276	28.4143
AT1G17560	HUELLENLOS (HLL)	2.31009	1.59669	2.20825	2.03835
AT1G17580	MYOSIN 1 (MYA1)	5.90318	4.44229	5.01372	5.11973
AT1G17590	"NUCLEAR FACTOR Y, SUBUNIT A8" (NF-YA8)	6.38874	10.2738	7.14319	7.93525
AT1G17600	Disease resistance protein (TIR-NBS-LRR class) family	16.1545	18.228	14.8949	16.4258
AT1G17610	Disease resistance protein (TIR-NBS class)	14.0321	16.4667	18.3608	16.2865
AT1G17620	Late embryogenesis abundant (LEA) hydroxyproline-rich glycoprotein family	137.071	293.776	357.414	262.754
AT1G17640	RNA-binding (RRM/RBD/RNP motifs) family protein	2.32696	2.64469	3.88894	2.95353
AT1G17650	GLYOXYLATE REDUCTASE 2 (GLYR2)	26.8111	22.2095	17.2686	22.0964
AT1G17665	CA-responsive protein	0.603385	0.0935302	3.09508	1.264
AT1G17680	tetratricopeptide repeat (TPR)-containing protein	4.36809	4.60351	5.47515	4.81558
AT1G17690	NUCLEOLAR FACTOR 1 (NOF1)	2.97133	3.8792	2.66111	3.17055
AT1G17720	(ATB BETA)	13.0377	11.0671	14.0557	12.7202
AT1G17730	VACUOLAR PROTEIN SORTING 46.1 (VPS46.1)	33.0763	33.6533	37.0233	34.5843
AT1G17745	3-PHOSPHOGLYCERATE DEHYDROGENASE (PGDH)	3.62973	5.54168	10.7389	6.63676
AT1G17750	PEP1 RECEPTOR 2 (PEPR2)	10.4627	9.73608	9.87955	10.0261
AT1G17760	(CSTF77)	2.48212	3.09724	2.89882	2.82606
AT1G17780	transmembrane protein	13.78	11.682	15.5872	13.6831
AT1G17790	DNA-binding bromodomain-containing protein	7.74518	7.94691	6.30652	7.33287
AT1G17820	testis-expressed sequence 2-like protein (DUF2404)	7.04277	7.67296	7.49752	7.40442
AT1G17830	hypothetical protein (DUF789)	1.14871	1.95265	1.65341	1.58492
AT1G17840	ATP-BINDING CASSETTE G11 (ABCG11)	24.3241	21.7093	17.3291	21.1208
AT1G17850	Rhodanese/Cell cycle control phosphatase superfamily protein	4.43063	3.37892	3.19143	3.66699
AT1G17860	Kunitz family trypsin and protease inhibitor protein	46.5589	35.2458	27.4135	36.4061
AT1G17870	ETHYLENE-DEPENDENT GRAVITROPISM-DEFICIENT AND YELLOW-GREEN-LIKE 3 (EGY3)	4.57375	46.3219	2.07942	17.6584
AT1G17880	BASIC TRANSCRIPTION FACTOR 3 (BTF3)	69.4907	76.3948	44.5557	63.4804
AT1G17890	(GER2)	19.045	21.7897	28.5973	23.144
AT1G17930	MAIN; MAINTENANCE OF MERISTEMS	3.84827	2.98	3.84914	3.55914
AT1G17940	Endosomal targeting BRO1-like domain-containing protein	2.50347	2.48446	2.50249	2.49681
AT1G17970	RING/U-box superfamily protein	3.51378	3.94928	6.89073	4.7846
AT1G17980	POLY(A) POLYMERASE 1 (PAPS1)	20.7981	27.3841	35.5228	27.9017
AT1G17990	FMN-linked oxidoreductases superfamily protein	41.2748	60.987	44.2556	48.8391
AT1G18000	Major facilitator superfamily protein	19.4184	22.299	15.4841	19.0672
AT1G18010	Major facilitator superfamily protein	19.7705	21.8625	16.4403	19.3578
AT1G18020	FMN-linked oxidoreductases superfamily protein	50.4788	73.1783	52.2806	58.6459
AT1G18030	Protein phosphatase 2C family protein	6.5892	11.1244	6.18902	7.96753
AT1G18040	CYCLIN-DEPENDENT KINASE D1;3 (CDKD1;3)	2.15902	2.30191	1.85276	2.10456
AT1G18060	microbial collagenase	127.535	131.922	71.4308	110.296
AT1G18070	Translation elongation factor EF1A/initiation factor IF2gamma family protein	36.0199	43.3727	27.2552	35.5493
AT1G18075	MICRORNA159B (MIR159B)	3.91385	2.4692	5.30584	3.8963
AT1G18080	(ATARCA)	159.849	208.117	112.881	160.282
AT1G18090	5'-3' exonuclease family protein	1.9832	1.84754	0.909796	1.58018
AT1G18150	(ATMPK8)	8.89518	9.11058	12.029	10.0116
AT1G18160	Protein kinase superfamily protein	14.1447	10.9333	16.9689	14.0156
AT1G18170	FKBP-like peptidyl-prolyl cis-trans isomerase family protein	46.1334	39.6957	35.8185	40.5492
AT1G18180	3-oxo-5-alpha-steroid 4-dehydrogenase (DUF1295)	1.12483	1.3709	1.26577	1.25383
AT1G18190	GOLGIN CANDIDATE 2 (GC2)	5.39877	4.79215	5.36946	5.18679
AT1G18200	RAB GTPASE HOMOLOG A6B (RABA6b)	26.4979	22.0281	16.109	21.545
AT1G18210	Calcium-binding EF-hand family protein	177.321	187.695	208.838	191.285
AT1G18250	(ATLP-1)	5.84838	5.14623	1.9459	4.3135
AT1G18260	EMS-MUTAGENIZED BRI1 SUPPRESSOR 5 (EBS5)	16.2654	16.2853	28.1408	20.2305
AT1G18265	zein-binding protein (Protein of unknown function%2C DUF593)	1.25754	0.801379	2.19019	1.41637
AT1G18270	ketose-bisphosphate aldolase class-II family protein	5.92263	6.63	7.30318	6.61861
AT1G18300	NUDIX HYDROLASE HOMOLOG 4 (NUDT4)	282.559	340.158	523.733	382.15
AT1G18330	EARLY-PHYTOCHROME-RESPONSIVE1 (EPR1)	1.81283	16.8801	4.89408	7.86235
AT1G18335	Acyl-CoA N-acyltransferases (NAT) superfamily protein	2.27692	2.66657	2.21251	2.38533
AT1G18340	basal transcription factor complex subunit-like protein	2.70501	2.30155	2.09044	2.36567
AT1G18360	alpha/beta-Hydrolases superfamily protein	6.65913	6.8899	3.93825	5.82909
AT1G18390	LEAF RUST 10 DISEASE-RESISTANCE LOCUS RECEPTOR- LIKE PROTEIN KINASE-LIKE 1.1; LRK10L1.1	6.5695	4.13003	9.70793	6.80249
AT1G18400	BR ENHANCED EXPRESSION 1 (BEE1)	5.36828	3.54161	2.3794	3.7631
AT1G18440	Peptidyl-tRNA hydrolase family protein	13.06	11.3379	6.4005	10.2661
AT1G18450	ACTIN-RELATED PROTEIN 4 (ARP4)	8.26005	8.018	7.22182	7.83329
AT1G18460	alpha/beta-Hydrolases superfamily protein	30.9749	33.3305	11.764	25.3565
AT1G18470	Transmembrane Fragile-X-F-associated protein	10.9591	12.7661	19.315	14.3467
AT1G18480	SHEWENELLA-LIKE PROTEIN PHOSPHATASE 2 (SLP2)	11.8514	11.8686	12.0543	11.9247
AT1G18485	Pentatricopeptide repeat (PPR) superfamily protein	10.0144	9.12981	6.77398	8.6394
AT1G18490	PCO3; PLANT CYSTEINE OXIDASE 3	8.09209	7.57985	5.42682	7.03292
AT1G18500	METHYLTHIOALKYLMALATE SYNTHASE-LIKE 4 (MAML-4)	27.2768	25.5119	22.1473	24.9787
AT1G18540	Ribosomal protein L6 family protein	140.395	175.557	98.9824	138.311
AT1G18550	ATP binding microtubule motor family protein	1.38516	1.22107	0.728081	1.11144
AT1G18560	BED zinc finger and hAT dimerization domain-containing protein	2.10206	1.77668	2.09742	1.99205
AT1G18570	MYB DOMAIN PROTEIN 51 (MYB51)	32.6746	22.9557	44.1096	33.2466
AT1G18580	GALACTURONOSYLTRANSFERASE 11 (GAUT11)	9.14566	6.88836	9.02102	8.35168
AT1G18590	SULFOTRANSFERASE 17 (SOT17)	39.2562	52.4426	38.7369	43.4786
AT1G18600	RHOMBOID-LIKE PROTEIN 12 (RBL12)	8.21564	7.72794	6.57356	7.50572
AT1G18610	Galactose oxidase/kelch repeat superfamily protein	4.4938	2.85737	1.99241	3.11453
AT1G18620	TON1 RECRUITING MOTIF 3 (TRM3)	25.0984	16.4618	24.4089	21.9897
AT1G18630	GLYCINE-RICH RNA-BINDING PROTEIN 6 (GR-RBP6)	5.30772	3.85032	4.72824	4.62876
AT1G18640	3-PHOSPHOSERINE PHOSPHATASE (PSP)	12.2889	9.39149	9.51369	10.398
AT1G18650	PLASMODESMATA CALLOSE-BINDING PROTEIN 3 (PDCB3)	11.3907	10.2906	6.00477	9.22869
AT1G18660	zinc finger (C3HC4-type RING finger) family protein	17.5118	21.8137	10.6232	16.6495
AT1G18670	IMPAIRED IN BABA-INDUCED STERILITY 1 (IBS1)	3.83246	3.31905	3.75051	3.63401
AT1G18680	HNH endonuclease domain-containing protein	6.57896	5.30443	6.70527	6.19622
AT1G18690	XYLOGLUCAN XYLOSYLTRANSFERASE 4 (XXT4)	1.76071	1.04723	2.38508	1.731
AT1G18700	DNAJ heat shock N-terminal domain-containing protein	5.79956	4.78367	6.23306	5.60543
AT1G18710	MYB DOMAIN PROTEIN 47 (MYB47)	4.99563	6.02843	4.86886	5.29764
AT1G18720	ER membrane protein%2C putative (DUF962)	44.6173	51.8709	75.4795	57.3226
AT1G18730	PHOTOSYNTHETIC NDH SUBCOMPLEX B 4 (PnsB4)	97.496	80.1164	69.9828	82.5317
AT1G18740	ROH1%2C putative (DUF793)	337.865	439.428	498.243	425.179
AT1G18745		3.94822	4.31321	2.80366	3.68836
AT1G18750	AGAMOUS-LIKE 65 (AGL65)	6.48354	6.56722	2.2916	5.11412
AT1G18773	acyl thioesterase-like protein	6.92996	6.54857	3.97036	5.8163
AT1G18800	NAP1-RELATED PROTEIN 2 (NRP2)	7.312	7.4797	4.76757	6.51976
AT1G18810	phytochrome kinase substrate-like protein	12.9362	12.5692	3.95443	9.81993
AT1G18840	IQ-DOMAIN 30 (IQD30)	6.55301	5.73708	3.07883	5.12297
AT1G18850	hypothetical protein	4.5639	5.36404	3.04783	4.32526
AT1G18880	NITRATE TRANSPORTER 1.9 (NRT1.9)	3.93013	4.8745	2.15328	3.65264
AT1G18890	CALCIUM-DEPENDENT PROTEIN KINASE 1 (CDPK1)	41.5645	58.8755	70.1063	56.8488
AT1G18900	Pentatricopeptide repeat (PPR) superfamily protein	16.8912	21.4221	11.857	16.7235
AT1G18910	zinc ion binding protein	1.88281	2.73513	3.69288	2.77027
AT1G18950	DDT domain superfamily	6.79701	6.28294	6.28716	6.4557
AT1G19000	Homeodomain-like superfamily protein	181.72	235.778	154.495	190.664
AT1G19010	hypothetical protein	6.77104	7.45863	7.64935	7.293
AT1G19020	CDP-diacylglycerol-glycerol-3-phosphate 3-phosphatidyltransferase	305.819	271.506	391.7	323.009
AT1G19025	DNA repair metallo-beta-lactamase family protein	3.55791	2.90082	4.78784	3.74886
AT1G19050	RESPONSE REGULATOR 7 (ARR7)	35.3982	54.935	21.8585	37.3973
AT1G19070	F-box family protein	2.02216	1.65682	2.32525	2.00141
AT1G19080	TITAN 10 (TTN10)	3.40489	3.55725	3.75175	3.5713
AT1G19100	DEFECTIVE IN MERISTEM SILENCING 11 (DMS11)	1.91453	1.73479	1.3486	1.66597
AT1G19110	inter-alpha-trypsin inhibitor heavy chain-like protein	22.303	23.8393	18.677	21.6064
AT1G19120	Small nuclear ribonucleoprotein family protein	14.2115	12.2428	10.8862	12.4468
AT1G19130	RmlC-like jelly roll fold protein	34.5633	29.6377	33.3285	32.5098
AT1G19140	ubiquinone biosynthesis COQ9-like protein	25.7791	33.7781	10.5434	23.3669
AT1G19150	PHOTOSYSTEM I LIGHT HARVESTING COMPLEX GENE 6 (LHCA6)	208.52	201.937	113.988	174.815
AT1G19170	Pectin lyase-like superfamily protein	6.91018	6.62615	5.86806	6.46813
AT1G19180	JASMONATE-ZIM-DOMAIN PROTEIN 1 (JAZ1)	459.669	658.569	602.566	573.601
AT1G19200	cyclin-dependent kinase%2C putative (DUF581)	1.95692	1.59625	1.80546	1.78621
AT1G19210	Integrase-type DNA-binding superfamily protein	28.39	28.502	39.8878	32.26
AT1G19220	AUXIN RESPONSE FACTOR 19 (ARF19)	5.88761	6.15466	6.34006	6.12744
AT1G19240	transmembrane protein	3.92415	4.14683	5.18367	4.41822
AT1G19250	FLAVIN-DEPENDENT MONOOXYGENASE 1 (FMO1)	0.271207	0.720424	6.21642	2.40268
AT1G19270	DA1 (DA1)	5.97361	7.5267	11.3028	8.26771
AT1G19290	Pentatricopeptide repeat (PPR) superfamily protein	2.42659	2.67581	3.26009	2.7875
AT1G19300	PARVUS (PARVUS)	46.9081	43.0179	51.7799	47.2353
AT1G19310	RING/U-box superfamily protein	8.87221	5.132	29.5338	14.5127
AT1G19330	histone deacetylase complex subunit	9.60507	9.02211	4.08988	7.57236
AT1G19340	Methyltransferase MT-A70 family protein	1.72302	2.8411	2.56785	2.37732
AT1G19350	BRI1-EMS-SUPPRESSOR 1 (BES1)	138.701	141.846	62.7411	114.429
AT1G19360	REDUCED RESIDUAL ARABINOSE 3 (RRA3)	17.8754	13.5043	26.112	19.1639
AT1G19370	membrane protein	9.02006	7.05801	10.157	8.74501
AT1G19380	sugar%2C putative (DUF1195)	468.107	459.379	347.164	424.883
AT1G19394	hypothetical protein	0.972796	0.836897	1.23636	1.01535
AT1G19397	transmembrane protein	1.49644	1.41361	1.86458	1.59154
AT1G19400	Erythronate-4-phosphate dehydrogenase family protein	65.6329	69.9132	29.9074	55.1511
AT1G19430	S-adenosyl-L-methionine-dependent methyltransferases superfamily protein	10.2857	7.07904	8.05687	8.47387
AT1G19440	3-KETOACYL-COA SYNTHASE 4 (KCS4)	23.2818	25.7413	14.8343	21.2858
AT1G19450	Major facilitator superfamily protein	111.539	99.5072	43.323	84.7898
AT1G19480	DNA glycosylase superfamily protein	3.68237	2.61965	2.47502	2.92568
AT1G19485	Transducin/WD40 repeat-like superfamily protein	5.4927	4.85404	5.68299	5.34324
AT1G19490	Basic-leucine zipper (bZIP) transcription factor family protein	6.97631	6.40542	0.993991	4.79191
AT1G19510	RAD-LIKE 5 (RL5)	6.4879	5.80099	5.04607	5.77832
AT1G19520	NUCLEAR FUSION DEFECTIVE 5 (NFD5)	9.4166	9.05069	6.19215	8.21982
AT1G19550	DEHYDROASCORBATE REDUCTASE; DHAR	40.906	56.4786	46.81	48.0649
AT1G19570	DEHYDROASCORBATE REDUCTASE (DHAR1)	150.549	213.761	182.427	182.246
AT1G19580	GAMMA CARBONIC ANHYDRASE 1 (GAMMA CA1)	14.9131	15.806	11.4236	14.0475
AT1G19600	pfkB-like carbohydrate kinase family protein	22.1623	17.1706	16.2384	18.5238
AT1G19610	(PDF1.4)	0.653479	0.97446	20.8185	7.48216
AT1G19640	JASMONIC ACID CARBOXYL METHYLTRANSFERASE (JMT)	9.49908	14.2509	2.07198	8.60732
AT1G19650	Sec14p-like phosphatidylinositol transfer family protein	10.6653	14.6594	7.2275	10.8507
AT1G19660	ATBBD2; BBD2; BIFUNCTIONAL NUCLEASE IN BASAL DEFENSE RESPONSE 2	61.8578	64.7656	109.85	78.8246
AT1G19670	CHLOROPHYLLASE 1 (CLH1)	66.858	64.6659	57.0781	62.8673
AT1G19680	RING/U-box superfamily protein	22.632	15.4444	19.3809	19.1524
AT1G19690	NAD(P)-binding Rossmann-fold superfamily protein	5.94546	4.61409	5.08739	5.21565
AT1G19700	BEL1-LIKE HOMEODOMAIN 10 (BEL10)	36.0893	42.3909	10.836	29.7721
AT1G19710	UDP-Glycosyltransferase superfamily protein	7.45791	5.52952	4.66155	5.88299
AT1G19715	Mannose-binding lectin superfamily protein	60.4469	67.9846	42.5749	57.0021
AT1G19720	Pentatricopeptide repeat (PPR-like) superfamily protein	54.1819	62.0708	45.7803	54.011
AT1G19730	(ATTRX4)	9.52154	8.60614	8.90996	9.01255
AT1G19740	ATP-dependent protease La (LON) domain protein	102.671	88.8603	96.7483	96.0934
AT1G19770	PURINE PERMEASE 14 (PUP14)	906.088	538.938	663.882	702.969
AT1G19800	ATP-BINDING CASSETTE I14 (ABCI14)	20.8533	24.0645	19.304	21.4073
AT1G19835	filament-like protein (DUF869)	36.099	40.1811	38.7562	38.3454
AT1G19840	SAUR53; SMALL AUXIN UPREGULATED RNA 53	2.52113	3.79562	0.467276	2.26134
AT1G19850	MONOPTEROS (MP)	3.65931	2.29375	1.92751	2.62686
AT1G19860	Zinc finger C-x8-C-x5-C-x3-H type family protein	8.06539	8.54474	4.8386	7.14958
AT1G19870	IQ-DOMAIN 32 (iqd32)	18.6064	15.7062	19.3053	17.8726
AT1G19880	Regulator of chromosome condensation (RCC1) family protein	11.2234	10.418	10.8932	10.8449
AT1G19910	(AVA-P2)	149.059	142.158	129.705	140.307
AT1G19920	(APS2)	91.1381	80.6099	39.7281	70.492
AT1G19940	GLYCOSYL HYDROLASE 9B5 (GH9B5)	2.16362	3.55091	0.733284	2.14927
AT1G19950	HVA22-LIKE PROTEIN H (ATHVA22H) (HVA22H)	5.05658	5.14299	2.43955	4.21304
AT1G19960	transcription factor	18.0709	43.1272	43.2489	34.8157
AT1G19970	ER lumen protein retaining receptor family protein	6.13877	5.9219	1.34168	4.46745
AT1G19980	cytomatrix protein-like protein	2.72945	2.79466	2.00221	2.50877
AT1G19990	nucleolin	3.82237	5.00683	2.69538	3.84153
AT1G20010	TUBULIN BETA-5 CHAIN (TUB5)	47.6135	19.4832	49.1806	38.7591
AT1G20020	FERREDOXIN-NADP(+)-OXIDOREDUCTASE 2 (FNR2)	441.988	343.374	403.107	396.156
AT1G20030	Pathogenesis-related thaumatin superfamily protein	0.473943	0.891576	2.18452	1.18334
AT1G20050	HYDRA1 (HYD1)	37.0259	35.1474	32.5549	34.9094
AT1G20070	hypothetical protein	27.9036	19.4892	8.83127	18.7413
AT1G20090	RHO-RELATED PROTEIN FROM PLANTS 2 (ROP2)	28.1132	29.9651	27.2994	28.4592
AT1G20100	DNA ligase-like protein	56.8412	75.2436	56.2626	62.7824
AT1G20110	FREE1; FYVE DOMAIN PROTEIN REQUIRED FOR ENDOSOMAL SORTING 1; FYVE-DOMAIN PROTEIN 1; FYVE1	27.9481	33.7778	44.0285	35.2515
AT1G20120	GDSL-like Lipase/Acylhydrolase superfamily protein	1.2023	1.49034	0.476487	1.05638
AT1G20140	SKP1-LIKE 4 (SK4)	6.01995	6.67664	4.25615	5.65092
AT1G20160	(ATSBT5.2)	5.13624	6.27129	7.10805	6.17186
AT1G20190	EXPANSIN 11 (EXPA11)	26.2104	9.64471	7.9131	14.5894
AT1G20200	EMBRYO DEFECTIVE 2719 (emb2719)	17.9732	18.9946	20.8636	19.2771
AT1G20220	Alba DNA/RNA-binding protein	12.693	18.8659	7.0511	12.87
AT1G20225	Thioredoxin superfamily protein	22.9049	27.6494	25.2311	25.2618
AT1G20260	V-ATPASE B SUBUNIT 3 (VAB3)	48.7341	50.4386	40.4293	46.534
AT1G20270	2-oxoglutarate (2OG) and Fe(II)-dependent oxygenase superfamily protein	4.80295	5.11321	4.72112	4.87909
AT1G20300	Pentatricopeptide repeat (PPR) superfamily protein	7.1576	6.30547	5.56321	6.34209
AT1G20310	syringolide-induced protein	32.0024	37.4813	25.4709	31.6515
AT1G20330	STEROL METHYLTRANSFERASE 2 (SMT2)	110.927	143.777	95.2234	116.643
AT1G20340	DNA-DAMAGE-REPAIR/TOLERATION PROTEIN 112 (DRT112)	6459.99	6633.41	4211.45	5768.28
AT1G20350	TRANSLOCASE INNER MEMBRANE SUBUNIT 17-1 (TIM17-1)	18.2408	47.1606	81.3411	48.9142
AT1G20370	Pseudouridine synthase family protein	6.16929	5.31755	3.79342	5.09342
AT1G20410	Pseudouridine synthase family protein	2.04432	1.88741	1.9687	1.96681
AT1G20430	hypothetical protein	20.2468	18.0055	18.8414	19.0313
AT1G20440	COLD-REGULATED 47 (COR47)	379.012	452.781	473.456	435.083
AT1G20450	EARLY RESPONSIVE TO DEHYDRATION 10 (ERD10)	708.143	891.652	498.423	699.406
AT1G20460	NADH-ubiquinone oxidoreductase chain	3.72235	4.24422	5.04246	4.33634
AT1G20470	SAUR-like auxin-responsive protein family	7.57811	8.6926	2.12342	6.13138
AT1G20490	AMP-dependent synthetase and ligase family protein	2.78709	3.05798	4.2609	3.36866
AT1G20510	OPC-8:0 COA LIGASE1 (OPCL1)	476.587	540.831	371.315	462.911
AT1G20540	Transducin/WD40 repeat-like superfamily protein	6.67929	4.87004	5.33428	5.62787
AT1G20550	O-fucosyltransferase family protein	1.09657	1.24355	1.64706	1.32906
AT1G20560	ACYL ACTIVATING ENZYME 1 (AAE1)	10.3147	9.14175	11.8494	10.4353
AT1G20575	DOLICHOL PHOSPHATE MANNOSE SYNTHASE 1 (DPMS1)	6.1771	5.68959	8.87398	6.91356
AT1G20580	Small nuclear ribonucleoprotein family protein	15.8301	16.7814	15.0782	15.8966
AT1G20620	CATALASE 3 (CAT3)	129.837	129.871	878.431	379.38
AT1G20630	CATALASE 1 (CAT1)	14.2023	15.8537	31.2001	20.4187
AT1G20640	NIN-LIKE PROTEIN 4; NLP4	9.12598	10.797	5.04423	8.32239
AT1G20650	ALTERED SEED GERMINATION 5 (ASG5)	16.5333	24.9085	8.605	16.6823
AT1G20670	DNA-binding bromodomain-containing protein	8.78624	9.44647	8.61144	8.94805
AT1G20680	transport/golgi organization-like protein (DUF833)	2.00644	1.50484	1.15515	1.55547
AT1G20693	HIGH MOBILITY GROUP B2 (HMGB2)	41.4156	25.8755	64.0319	43.7744
AT1G20696	HIGH MOBILITY GROUP B3 (HMGB3)	28.7032	26.3803	40.9295	32.0043
AT1G20760	Calcium-binding EF hand family protein	10.8517	10.5994	14.8636	12.1049
AT1G20770	coiled-coil protein	10.77	9.33192	9.71458	9.93883
AT1G20780	SENESCENCE-ASSOCIATED E3 UBIQUITIN LIGASE 1 (SAUL1)	14.3824	14.4539	16.605	15.1471
AT1G20810	FKBP-like peptidyl-prolyl cis-trans isomerase family protein	67.7843	57.9605	36.6092	54.118
AT1G20816	outer envelope pore-like protein	8.42441	9.57133	5.57435	7.8567
AT1G20823	ATATL80	443.312	449.24	157.569	350.04
AT1G20830	MULTIPLE CHLOROPLAST DIVISION SITE 1 (MCD1)	13.9361	12.8516	9.33752	12.0417
AT1G20840	TONOPLAST MONOSACCHARIDE TRANSPORTER1 (TMT1)	14.3551	6.13577	17.5226	12.6712
AT1G20850	XYLEM CYSTEINE PEPTIDASE 2 (XCP2)	36.9595	38.9112	21.7742	32.5483
AT1G20870	HSP20-like chaperones superfamily protein	1.80472	1.24707	0.405308	1.15237
AT1G20880	RNA-binding (RRM/RBD/RNP motifs) family protein	4.59808	4.31534	6.16623	5.02655
AT1G20890	caveolin-1 protein	5.74718	4.36712	5.95847	5.35759
AT1G20910	ARID/BRIGHT DNA-binding domain-containing protein	3.07082	3.48264	1.99918	2.85088
AT1G20920	P-loop containing nucleoside triphosphate hydrolases superfamily protein	13.4259	13.6401	16.2826	14.4495
AT1G20930	CYCLIN-DEPENDENT KINASE B2;2 (CDKB2;2)	2.07134	2.56758	1.48611	2.04167
AT1G20950	Phosphofructokinase family protein	12.8097	14.8236	5.41937	11.0176
AT1G20960	EMBRYO DEFECTIVE 1507 (emb1507)	28.5437	28.3174	24.6598	27.1737
AT1G20970	calponin-like domain protein	20.9249	20.0563	30.5115	23.8309
AT1G20980	SQUAMOSA PROMOTER BINDING PROTEIN-LIKE 14 (SPL14)	37.6429	31.91	48.3172	39.29
AT1G21000	PLATZ transcription factor family protein	102.128	110.588	77.8425	96.8527
AT1G21010	poly polymerase	31.9046	34.8613	21.4524	29.4061
AT1G21050	MIZU-KUSSEI-like protein (Protein of unknown function%2C DUF617)	28.7889	17.1811	16.7506	20.9069
AT1G21060	Serine/Threonine-kinase%2C putative (Protein of unknown function%2C DUF547)	11.1504	10.8265	4.65441	8.87709
AT1G21065	secondary thiamine-phosphate synthase enzyme	85.3529	95.2894	64.5302	81.7242
AT1G21070	UDP-RHA/UDP-GAL TRANSPORTER 2; URGT2	6.21287	4.74495	3.61314	4.85698
AT1G21080	DNAJ heat shock N-terminal domain-containing protein	26.8843	30.4129	25.7176	27.6716
AT1G21090	Cupredoxin superfamily protein	5.48811	3.18006	4.55413	4.40743
AT1G21100	INDOLE GLUCOSINOLATE O-METHYLTRANSFERASE 1 (IGMT1)	16.8945	4.59533	20.1528	13.8809
AT1G21110	INDOLE GLUCOSINOLATE O-METHYLTRANSFERASE 3 (IGMT3)	16.9383	6.29065	16.5867	13.2719
AT1G21120	INDOLE GLUCOSINOLATE O-METHYLTRANSFERASE 2 (IGMT2)	19.6591	8.23695	10.9317	12.9426
AT1G21130	INDOLE GLUCOSINOLATE O-METHYLTRANSFERASE 4 (IGMT4)	216.483	61.5461	256.669	178.233
AT1G21140	Vacuolar iron transporter (VIT) family protein	4.7776	6.31619	0.823321	3.97237
AT1G21150	Mitochondrial transcription termination factor family protein	1.48668	1.1653	0.776779	1.14292
AT1G21160	eukaryotic translation initiation factor 2 (eIF-2) family protein	7.86921	6.9998	6.47248	7.11383
AT1G21170	(SEC5B)	4.23383	3.53947	4.77991	4.1844
AT1G21190	LSM3A; SM-LIKE 3A	12.1725	11.8513	15.7723	13.2654
AT1G21200	sequence-specific DNA binding transcription factor	3.81555	3.98669	5.18538	4.3292
AT1G21210	WALL ASSOCIATED KINASE 4 (WAK4)	0.681858	1.67804	1.90125	1.42038
AT1G21240	WALL ASSOCIATED KINASE 3 (WAK3)	4.26188	14.699	42.1003	20.3537
AT1G21250	CELL WALL-ASSOCIATED KINASE (WAK1)	59.3142	140.165	181.089	126.856
AT1G21270	WALL-ASSOCIATED KINASE 2 (WAK2)	27.9488	35.3113	68.4396	43.8999
AT1G21280	Copia-like polyprotein/retrotransposon	8.52046	10.0736	4.87617	7.82341
AT1G21310	EXTENSIN 3 (EXT3)	22.2825	52.2957	380.392	151.657
AT1G21326	VQ motif-containing protein	6.67311	3.88524	4.79737	5.11857
AT1G21350	Thioredoxin superfamily protein	15.9039	18.9582	14.8109	16.5577
AT1G21370	transmembrane protein	11.5218	11.4231	17.9547	13.6332
AT1G21380	Target of Myb protein 1	30.1431	33.1519	35.359	32.8847
AT1G21390	EMBRYO DEFECTIVE 2170 (emb2170)	5.84858	5.7616	14.8468	8.819
AT1G21400	Thiamin diphosphate-binding fold (THDP-binding) superfamily protein	5.0637	6.92687	10.7495	7.58002
AT1G21410	(SKP2A)	11.8643	15.3381	8.67421	11.9589
AT1G21440	Phosphoenolpyruvate carboxylase family protein	15.6459	27.4275	29.984	24.3524
AT1G21450	SCARECROW-LIKE 1 (SCL1)	24.8869	32.9977	33.5617	30.4821
AT1G21460	(SWEET1)	18.1031	30.7064	9.83134	19.5469
AT1G21480	Exostosin family protein	4.50896	3.76893	4.67605	4.31798
AT1G21500	hypothetical protein	178.43	169.234	154.525	167.396
AT1G21520	hypothetical protein	9.50032	26.6529	63.0382	33.0638
AT1G21525		0.646515	7.11932	13.092	6.95262
AT1G21540	AMP-dependent synthetase and ligase family protein	2.77839	1.94642	2.76488	2.49656
AT1G21550	Calcium-binding EF-hand family protein	9.19351	71.5055	65.8931	48.864
AT1G21560	hypothetical protein	5.33251	4.26152	4.99305	4.86236
AT1G21580	Zinc finger C-x8-C-x5-C-x3-H type family protein	23.6153	24.1899	26.6052	24.8035
AT1G21590	kinase with adenine nucleotide alpha hydrolases-like domain-containing protein	37.4796	26.864	22.3132	28.8856
AT1G21600	PLASTID TRANSCRIPTIONALLY ACTIVE 6 (PTAC6)	32.8831	21.5175	23.9348	26.1118
AT1G21610	UBINUCLEIN 1; UBN1	6.23153	4.95052	7.41758	6.19988
AT1G21630	Calcium-binding EF hand family protein	23.3524	21.7587	25.1083	23.4065
AT1G21640	NAD KINASE 2 (NADK2)	32.3289	41.0242	34.2258	35.8596
AT1G21650	(SECA2)	2.85725	2.20577	2.62695	2.56333
AT1G21660	Chaperone DnaJ-domain superfamily protein	24.8208	23.1266	14.2614	20.7363
AT1G21670	DPP6 amino-terminal domain protein	9.79661	14.8735	18.8146	14.4949
AT1G21680	DPP6 N-terminal domain-like protein	38.4253	42.5923	58.7219	46.5798
AT1G21690	EMBRYO DEFECTIVE 1968 (emb1968)	3.89116	3.2881	3.44162	3.54029
AT1G21700	SWITCH/SUCROSE NONFERMENTING 3C (SWI3C)	9.26691	9.73133	9.72332	9.57385
AT1G21710	8-OXOGUANINE-DNA GLYCOSYLASE 1 (OGG1)	8.43877	6.62304	7.95645	7.67276
AT1G21720	PROTEASOME BETA SUBUNIT C1 (PBC1)	28.0528	27.5183	34.8899	30.1537
AT1G21730	KIN7.1; KINESIN 7.1	1.73354	1.06825	1.73975	1.51385
AT1G21750	PDI-LIKE 1-1 (PDIL1-1)	12.604	23.4273	72.8308	36.2874
AT1G21760	F-BOX PROTEIN 7 (FBP7)	8.93665	11.0468	9.75882	9.91409
AT1G21770	Acyl-CoA N-acyltransferases (NAT) superfamily protein	2.77378	2.66225	4.50852	3.31485
AT1G21780	BTB/POZ domain-containing protein	19.3171	21.0815	21.3265	20.575
AT1G21790	TRAM%2C LAG1 and CLN8 (TLC) lipid-sensing domain containing protein	8.82136	12.0835	6.13176	9.0122
AT1G21830	hypothetical protein	10.3997	8.31677	16.9404	11.8856
AT1G21840	UREASE ACCESSORY PROTEIN F (UREF)	2.718	1.12495	3.27633	2.37309
AT1G21880	LYSM DOMAIN GPI-ANCHORED PROTEIN 1 PRECURSOR (LYM1)	10.763	8.38515	5.05203	8.06673
AT1G21900	P24 SUBFAMILY DELTA 5; P24DELTA5	25.2813	28.3617	30.2185	27.9538
AT1G21910	DEHYDRATION RESPONSE ELEMENT-BINDING PROTEIN 26 (DREB26)	87.1507	209.477	177.437	158.022
AT1G21920	Histone H3 K4-specific methyltransferase SET7/9 family protein	42.5939	41.5526	37.7081	40.6182
AT1G21930	transmembrane protein	10.0768	8.53402	9.55528	9.38869
AT1G21980	PHOSPHATIDYLINOSITOL-4-PHOSPHATE 5-KINASE 1 (PIP5K1)	15.3463	10.8238	7.82994	11.3333
AT1G22020	SERINE HYDROXYMETHYLTRANSFERASE 6 (SHM6)	12.3706	11.4364	10.7231	11.51
AT1G22040	Galactose oxidase/kelch repeat superfamily protein	7.13635	7.22628	7.9415	7.43471
AT1G22050	MEMBRANE-ANCHORED UBIQUITIN-FOLD PROTEIN 6 PRECURSOR (MUB6)	6.64247	6.29792	5.77346	6.23795
AT1G22060	sporulation-specific protein	9.67672	7.45269	11.2146	9.44801
AT1G22070	TGA1A-RELATED GENE 3 (TGA3)	4.19632	7.33336	15.6597	9.06314
AT1G22140	zinc finger CCCH domain protein	34.7234	38.4847	17.2833	30.1638
AT1G22160	senescence-associated family protein (DUF581)	9.33189	16.995	6.03314	10.7867
AT1G22170	Phosphoglycerate mutase family protein	1.96461	1.29066	0.938221	1.39783
AT1G22180	Sec14p-like phosphatidylinositol transfer family protein	8.9014	7.37987	17.399	11.2267
AT1G22190	RAP2.4; RELATED TO AP2 4; WIND2	284.283	351.275	239.498	291.685
AT1G22200	Endoplasmic reticulum vesicle transporter protein	12.2126	11.4628	9.72074	11.1321
AT1G22220	AUXIN UP-REGULATED F-BOX PROTEIN 2 (AUF2)	1.2729	1.11246	0.796042	1.06047
AT1G22230	nucleolar GTP-binding protein	2.82653	2.94447	0.830878	2.20062
AT1G22270	Trm112p-like protein	19.4974	20.7809	19.749	20.0091
AT1G22280	PHYTOCHROME-ASSOCIATED PROTEIN PHOSPHATASE TYPE 2C (PAPP2C)	76.1874	71.9237	78.9918	75.701
AT1G22300	GENERAL REGULATORY FACTOR 10 (GRF10)	61.229	65.2937	63.5301	63.3509
AT1G22310	METHYL-CPG-BINDING DOMAIN 8 (MBD8)	6.05547	5.54547	7.73102	6.44399
AT1G22330	RNA-binding (RRM/RBD/RNP motifs) family protein	3.96459	2.94342	3.17367	3.36056
AT1G22340	UDP-GLUCOSYL TRANSFERASE 85A7 (UGT85A7)	1.11859	1.18045	0.909853	1.06963
AT1G22350		8.57763	9.3755	8.56144	8.83819
AT1G22360	UDP-GLUCOSYL TRANSFERASE 85A2 (UGT85A2)	8.10785	8.21599	23.1471	13.157
AT1G22370	UDP-GLUCOSYL TRANSFERASE 85A5 (UGT85A5)	1.69201	2.84026	4.17846	2.90358
AT1G22400	(UGT85A1)	10.8931	21.998	57.4443	30.1118
AT1G22403		5.07223	6.2207	7.43301	6.24198
AT1G22410	Class-II DAHP synthetase family protein	61.3168	93.4406	121.724	92.1605
AT1G22430	GroES-like zinc-binding dehydrogenase family protein	23.756	23.6785	15.9764	21.137
AT1G22450	CYTOCHROME C OXIDASE 6B (COX6B)	39.6035	47.44	34.9989	40.6808
AT1G22470	hypothetical protein	2.10123	2.72126	2.52695	2.44981
AT1G22500	ARABIDOPSIS TOXICOS EN LEVADURA 15 (ATL15)	3.14179	2.78346	9.15468	5.02664
AT1G22510	E3 ubiquitin-protein ligase RNF170-like protein (DUF 1232)	15.8059	19.353	21.7029	18.9539
AT1G22520	MICOS complex subunit Mic10-like protein (DUF543)	12.9429	11.9123	9.9911	11.6155
AT1G22530	PATELLIN 2 (PATL2)	51.1681	50.0598	91.7575	64.3284
AT1G22540	NPF5.10	3.86025	3.13793	5.74311	4.24709
AT1G22550	Major facilitator superfamily protein	1.69136	1.16802	1.22834	1.36258
AT1G22570	Major facilitator superfamily protein	28.78	41.4527	105.368	58.5336
AT1G22590	AGAMOUS-LIKE 87 (AGL87)	9.60816	8.14121	5.08656	7.61198
AT1G22610	C2 calcium/lipid-binding plant phosphoribosyltransferase family protein	32.7898	25.636	30.728	29.7179
AT1G22620	SUPPRESSOR OF ACTIN 1 (ATSAC1)	9.13251	5.97474	8.90263	8.0033
AT1G22630	SSUH2-like protein	97.9091	80.4251	49.6559	75.9967
AT1G22640	MYB DOMAIN PROTEIN 3 (MYB3)	8.99646	8.01879	4.32363	7.11296
AT1G22650	ALKALINE/NEUTRAL INVERTASE D (A/N-InvD)	10.0968	14.0613	6.54616	10.2348
AT1G22660	Polynucleotide adenylyltransferase family protein	1.61922	1.52845	2.18654	1.77807
AT1G22690	Gibberellin-regulated family protein	76.6247	60.9339	41.3083	59.6223
AT1G22700	Tetratricopeptide repeat (TPR)-like superfamily protein	62.6244	56.7586	52.6698	57.3509
AT1G22710	SUCROSE-PROTON SYMPORTER 2 (SUC2)	185.917	210.108	160.439	185.488
AT1G22730	MA3 domain-containing protein	14.2271	12.0302	12.4172	12.8915
AT1G22740	RAB GTPASE HOMOLOG G3B (RABG3B)	9.34289	6.12395	8.77863	8.08182
AT1G22750	transmembrane protein	28.8765	36.7118	22.5755	29.3879
AT1G22770	GIGANTEA (GI)	0.94824	5.43848	5.18292	3.85655
AT1G22780	POINTED FIRST LEAVES (PFL)	60.7139	78.4506	35.1774	58.114
AT1G22790	Low affinity potassium transport system protein	5.52294	5.99328	5.55599	5.69074
AT1G22800	S-adenosyl-L-methionine-dependent methyltransferases superfamily protein	4.59679	4.51465	4.20028	4.43724
AT1G22810	ATERF019; ERF019	40.2326	43.9766	21.7066	35.3053
AT1G22830	Tetratricopeptide repeat (TPR)-like superfamily protein	5.37529	5.93377	5.39918	5.56941
AT1G22840	CYTOCHROME C-1 (CYTC-1)	64.2348	73.0334	71.6173	69.6285
AT1G22850	SNARE associated Golgi protein family	113.864	153.98	63.0331	110.292
AT1G22860	Vacuolar sorting protein 39	4.75797	3.88406	4.84504	4.49569
AT1G22870	kinase family with ARM repeat domain-containing protein	9.01207	10.9003	10.9026	10.2717
AT1G22880	CELLULASE 5 (CEL5)	6.3632	6.22118	6.53679	6.37372
AT1G22882	ATSUN3; SUN-DOMAIN PROTEIN 3; SUN3	15.4325	19.7372	25.6863	20.2853
AT1G22885	transmembrane protein	29.4871	22.1887	17.6827	23.1195
AT1G22890	transmembrane protein	95.9605	108.204	189.225	131.13
AT1G22900	Disease resistance-responsive (dirigent-like protein) family protein	4.03954	5.07726	4.18728	4.43469
AT1G22910	RNA-binding (RRM/RBD/RNP motifs) family protein	14.3419	14.0037	7.06356	11.8031
AT1G22920	COP9 SIGNALOSOME 5A (CSN5A)	16.1444	14.8757	16.66	15.8934
AT1G22930	T-complex protein 11	123.143	142.16	135.777	133.693
AT1G22940	THIAMINE REQUIRING 1 (TH1)	14.1595	10.7821	9.29725	11.413
AT1G22950	2-oxoglutarate (2OG) and Fe(II)-dependent oxygenase superfamily protein	4.40335	4.87809	3.33369	4.20505
AT1G22960	Pentatricopeptide repeat (PPR) superfamily protein	2.81808	2.94218	2.87385	2.87804
AT1G22970	cyclin-D1-binding protein	6.16805	6.26418	7.29176	6.57466
AT1G22985	CYTOKININ RESPONSE FACTOR 7 (CRF7)	4.83261	7.31247	7.05666	6.40058
AT1G23010	LOW PHOSPHATE ROOT1 (LPR1)	1.0991	1.32624	1.13686	1.1874
AT1G23020	FERRIC REDUCTION OXIDASE 3 (FRO3)	20.0872	19.8566	44.2331	28.059
AT1G23030	PLANT U-BOX PROTEIN 11; PUB11	43.1637	52.2242	32.6029	42.6636
AT1G23040	hydroxyproline-rich glycoprotein family protein	7.12676	12.8396	7.74417	9.23685
AT1G23080	PIN-FORMED 7 (PIN7)	26.0651	8.70179	17.1094	17.2921
AT1G23090	SULFATE TRANSPORTER 91 (AST91)	44.3458	37.3259	36.4864	39.3861
AT1G23100	GroES-like family protein	2.28792	2.38582	3.17214	2.61529
AT1G23130	Polyketide cyclase/dehydrase and lipid transport superfamily protein	1243.15	1452.41	1459	1384.85
AT1G23140	C2-DOMAIN ABA-RELATED8; CAR8	6.21257	9.70567	5.78052	7.23292
AT1G23170	transmembrane protein (Protein of unknown function DUF2359%2C transmembrane)	1.48863	1.83595	2.17171	1.8321
AT1G23180	ARM repeat superfamily protein	10.5127	14.3171	9.46597	11.4319
AT1G23190	PHOSPHOGLUCOMUTASE 3 (PGM3)	23.9863	29.837	17.6421	23.8218
AT1G23200	Plant invertase/pectin methylesterase inhibitor superfamily	1.9221	3.50681	1.66704	2.36532
AT1G23205	Plant invertase/pectin methylesterase inhibitor superfamily protein	11.0373	26.0193	5.60419	14.2203
AT1G23220	Dynein light chain type 1 family protein	10.418	11.4444	8.14207	10.0015
AT1G23230	mediator of RNA polymerase II transcription subunit	6.5815	7.6119	7.80446	7.33262
AT1G23260	MMS ZWEI HOMOLOGUE 1 (MMZ1)	16.5857	16.4752	20.4092	17.8234
AT1G23280	MAK16 protein-like protein	7.40185	11.8384	5.14004	8.12678
AT1G23290	(RPL27AB)	205.557	247.262	135.717	196.179
AT1G23310	GLUTAMATE:GLYOXYLATE AMINOTRANSFERASE (GGT1)	1620.39	1678.4	1064.42	1454.4
AT1G23330	alpha/beta-Hydrolases superfamily protein	10.3951	13.3012	5.66207	9.78612
AT1G23360	(MENG)	20.3867	14.5255	13.3895	16.1006
AT1G23390	Kelch repeat-containing F-box family protein	92.8193	119.989	92.2199	101.676
AT1G23400	(CAF2)	25.2023	25.7801	27.6395	26.2073
AT1G23410	Ribosomal protein S27a / Ubiquitin family protein	2.21506	2.74683	0.152172	1.70469
AT1G23440	Peptidase C15%2C pyroglutamyl peptidase I-like protein	16.6147	20.8189	28.8532	22.0956
AT1G23460	Pectin lyase-like superfamily protein	7.68612	7.9493	3.84335	6.49292
AT1G23480	CELLULOSE SYNTHASE-LIKE A3 (CSLA03)	12.1762	15.5298	9.75782	12.4879
AT1G23490	ADP-RIBOSYLATION FACTOR 1 (ARF1)	174.202	199.045	209.543	194.263
AT1G23530	transmembrane protein	3.96013	5.13505	2.74265	3.94594
AT1G23550	SIMILAR TO RCD ONE 2 (SRO2)	6.09985	6.7463	3.4404	5.42885
AT1G23710	hypothetical protein (DUF1645)	221.674	223.209	233.95	226.278
AT1G23730	BETA CARBONIC ANHYDRASE 3 (BCA3)	2.89728	2.50059	1.62066	2.33951
AT1G23740	ALKENAL/ONE OXIDOREDUCTASE (AOR)	240.299	319.74	124.115	228.051
AT1G23750	Nucleic acid-binding%2C OB-fold-like protein	8.8751	6.43297	5.25921	6.85576
AT1G23780	F-box family protein	17.7444	19.6052	17.7499	18.3665
AT1G23800	ALDEHYDE DEHYDROGENASE 2B7 (ALDH2B7)	2.14867	2.05143	1.63522	1.94511
AT1G23820	SPERMIDINE SYNTHASE 1 (SPDS1)	39.2749	42.335	39.6128	40.4076
AT1G23830	transmembrane protein	9.31732	8.13588	7.10226	8.18516
AT1G23840	transmembrane protein	5.2239	9.39417	20.6744	11.7641
AT1G23850	transmembrane protein	3.33109	5.91276	5.54176	4.92853
AT1G23860	RS-CONTAINING ZINC FINGER PROTEIN 21 (RSZ21)	11.9798	11.3603	10.6982	11.3461
AT1G23870	TREHALOSE-PHOSPHATASE/SYNTHASE 9 (TPS9)	42.9711	48.8586	34.2984	42.0427
AT1G23880	NHL domain-containing protein	4.04169	3.31149	1.58744	2.98021
AT1G23890	NHL domain-containing protein	2.07894	1.96737	1.33577	1.79403
AT1G23900	GAMMA-ADAPTIN 1 (GAMMA-ADAPTIN 1)	8.7999	8.08967	10.8575	9.24901
AT1G23950	hypothetical protein (DUF626)	9.42814	10.0612	9.78899	9.75945
AT1G23960	hypothetical protein (DUF626)	20.7721	18.1653	27.1588	22.0321
AT1G23970	hypothetical protein (DUF626)	5.39241	5.51313	4.56892	5.15815
AT1G23980	RING/U-box superfamily protein	2.40792	3.30803	2.39605	2.704
AT1G24020	MLP-LIKE PROTEIN 423 (MLP423)	6.55441	4.8368	1.81413	4.40178
AT1G24040	Acyl-CoA N-acyltransferases (NAT) superfamily protein	10.5495	9.59781	7.19162	9.11298
AT1G24050	RNA-processing%2C Lsm domain-containing protein	35.143	29.8003	25.6697	30.2043
AT1G24095	Putative thiol-disulfide oxidoreductase DCC	0.540683	0.74424	1.79581	1.02691
AT1G24100	UDP-GLUCOSYL TRANSFERASE 74B1 (UGT74B1)	84.8425	148.721	70.0575	101.207
AT1G24120	ARG1-LIKE 1 (ARL1)	10.1964	9.73757	9.0612	9.66506
AT1G24140	Matrixin family protein	74.0172	76.2601	102.464	84.2471
AT1G24145	transmembrane protein	74.5844	112.783	93.6885	93.6852
AT1G24147	transmembrane protein	97.1342	136.901	85.5074	106.514
AT1G24148	hypothetical protein	18.2274	18.535	19.0679	18.6101
AT1G24150	FORMIN HOMOLOGUE 4 (FH4)	36.8986	41.1279	58.8904	45.639
AT1G24160	triadin	23.2744	19.6081	21.7303	21.5376
AT1G24170	(LGT9)	67.2376	90.3462	91.1474	82.9104
AT1G24180	IAA-CONJUGATE-RESISTANT 4 (IAR4)	26.904	29.4273	25.9407	27.424
AT1G24190	SIN3-LIKE 3 (SNL3)	9.03684	8.42489	11.8159	9.7592
AT1G24240	Ribosomal protein L19 family protein	3.05387	2.69825	3.23438	2.9955
AT1G24267	bZIP transcription factor%2C putative (DUF1664)	10.1865	11.4891	8.36008	10.0119
AT1G24280	GLUCOSE-6-PHOSPHATE DEHYDROGENASE 3 (G6PD3)	3.2615	3.08879	2.50773	2.95267
AT1G24290	AAA-type ATPase family protein	2.97678	2.23713	2.05254	2.42215
AT1G24300	GYF domain-containing protein	11.6902	9.52103	11.1679	10.793
AT1G24310	NUP54	5.71205	6.12479	3.84023	5.22569
AT1G24330	ARM repeat superfamily protein	18.6121	26.1757	24.6312	23.1397
AT1G24340	EMBRYO DEFECTIVE 2421 (emb2421)	10.463	11.9244	7.33047	9.90594
AT1G24350	Acid phosphatase/vanadium-dependent haloperoxidase-related protein	12.8358	10.9471	11.6121	11.7983
AT1G24360	NAD(P)-binding Rossmann-fold superfamily protein	40.2309	33.2055	27.5082	33.6482
AT1G24400	LYSINE HISTIDINE TRANSPORTER 2 (LHT2)	3.47156	1.89624	2.21561	2.5278
AT1G24440	RING/U-box superfamily protein	5.12501	5.53545	9.5088	6.72309
AT1G24450	NUCLEAR FUSION DEFECTIVE 2 (NFD2)	6.94682	4.92062	8.13726	6.66824
AT1G24460	TGN-LOCALIZED SYP41 INTERACTING PROTEIN (TNO1)	15.9907	14.9685	19.2908	16.75
AT1G24470	BETA-KETOACYL REDUCTASE 2 (KCR2)	1.82535	1.95185	1.70388	1.82703
AT1G24490	ALBINA 4 (ALB4)	9.54899	12.8774	9.65406	10.6935
AT1G24510	TCP-1/cpn60 chaperonin family protein	35.5063	36.3383	29.6592	33.8346
AT1G24530	Transducin/WD40 repeat-like superfamily protein	9.59806	12.6752	37.7631	20.0121
AT1G24560	paramyosin	12.7039	11.0888	13.3991	12.3973
AT1G24575	DEAD-box ATP-dependent RNA helicase-like protein	15.5046	20.2408	39.5355	25.0936
AT1G24580	RING/U-box superfamily protein	18.4533	25.7632	3.53826	15.9183
AT1G24600	hypothetical protein	2.82025	5.56018	3.58434	3.98825
AT1G24610	Rubisco methyltransferase family protein	25.111	20.3979	14.5373	20.0154
AT1G24625	ZINC FINGER PROTEIN 7 (ZFP7)	3.96829	4.96	6.07529	5.00119
AT1G24706	(THO2)	7.17072	7.61522	7.21017	7.33203
AT1G24735	S-adenosyl-L-methionine-dependent methyltransferases superfamily protein	1.63407	2.13211	0.39805	1.38807
AT1G24764	MICROTUBULE-ASSOCIATED PROTEINS 70-2 (MAP70-2)	6.9789	5.52614	5.48557	5.99687
AT1G24793	LIPID X C1 (LPXC1)	4.82861	2.64703	4.4034	3.95968
AT1G24800	F-box family protein	11.569	11.0674	11.6426	11.4263
AT1G24807	Glutamine amidotransferase type 1 family protein	1.93304	2.78346	1.91662	2.21104
AT1G24880	LIPID X C2 (LPXC2)	3.69303	3.03795	3.75174	3.49424
AT1G24881	F-box family protein	11.0175	11.3584	12.5174	11.6311
AT1G24909	Glutamine amidotransferase type 1 family protein	2.34114	2.41102	2.49038	2.41418
AT1G24996	hypothetical protein	56.7021	45.4069	64.2418	55.4503
AT1G25054	LIPID X C3 (LPXC3)	3.46523	2.7294	4.08697	3.4272
AT1G25055	F-box family protein	11.3189	12.7141	12.8136	12.2822
AT1G25083	Glutamine amidotransferase type 1 family protein	2.99642	2.73205	2.14824	2.62557
AT1G25097	hypothetical protein	2.03197	1.7662	1.6575	1.81856
AT1G25098		18.843	16.268	20.4787	18.5299
AT1G25145	LIPID X C4 (LPXC4)	4.43793	3.19279	4.25496	3.96189
AT1G25150	F-box family protein	10.3997	11.7102	12.6312	11.5803
AT1G25155	Glutamine amidotransferase type 1 family protein	2.15317	2.74425	2.17185	2.35642
AT1G25175		31.1581	24.4561	37.5841	31.0661
AT1G25210	LIPID X C5 (LPXC5)	3.45745	2.77017	3.79798	3.34187
AT1G25211	F-box family protein	11.7365	12.0983	12.2828	12.0392
AT1G25220	ANTHRANILATE SYNTHASE BETA SUBUNIT 1 (ASB1)	20.0964	21.5603	19.2425	20.2997
AT1G25230	Calcineurin-like metallo-phosphoesterase superfamily protein	9.74561	7.21287	16.4664	11.1416
AT1G25250	INDETERMINATE(ID)-DOMAIN 16 (IDD16)	2.20438	1.43623	1.86775	1.83612
AT1G25260	Ribosomal protein L10 family protein	20.5956	28.249	9.40997	19.4182
AT1G25275	thionin-like protein	148.69	69.5463	249.388	155.875
AT1G25280	TUBBY LIKE PROTEIN 10 (TLP10)	21.5581	19.6974	18.8361	20.0305
AT1G25290	RHOMBOID-LIKE PROTEIN 10 (RBL10)	6.60129	5.30049	4.78528	5.56236
AT1G25320	Leucine-rich repeat protein kinase family protein	1.00861	0.867704	2.08618	1.32083
AT1G25350	OVULE ABORTION 9 (OVA9)	12.7739	17.7743	11.1046	13.8843
AT1G25370	hypothetical protein (DUF1639)	5.94046	6.38048	22.3523	11.5577
AT1G25375	Metallo-hydrolase/oxidoreductase superfamily protein	4.26704	3.68438	4.58879	4.18007
AT1G25380	NAD+ TRANSPORTER 2 (NDT2)	9.41224	8.80201	9.72812	9.31413
AT1G25390	LEAF RUST 10 DISEASE-RESISTANCE LOCUS RECEPTOR- LIKE PROTEIN KINASE-LIKE 4; LRK10L4	30.5974	32.769	29.5183	30.9616
AT1G25400	transmembrane protein	90.6963	125.035	106.667	107.466
AT1G25420	IST1-LIKE 2; ISTL2	21.414	21.4905	16.2429	19.7158
AT1G25425	CLAVATA3/ESR-RELATED 43 (CLE43)	4.31948	5.87961	3.07426	4.42445
AT1G25440	B-box type zinc finger protein with CCT domain-containing protein	196.47	239.146	107.596	181.071
AT1G25450	3-KETOACYL-COA SYNTHASE 5 (KCS5)	9.15213	7.28307	6.75286	7.72935
AT1G25480	aluminum activated malate transporter family protein	2.94269	2.82154	5.57477	3.77966
AT1G25490	ROOTS CURL IN NPA (RCN1)	29.4098	26.6801	26.9398	27.6766
AT1G25500	Plasma-membrane choline transporter family protein	2.62783	3.44712	5.59486	3.88993
AT1G25510	Eukaryotic aspartyl protease family protein	1.92609	0.979148	0.370899	1.09205
AT1G25520	Uncharacterized protein family (UPF0016)	12.7843	14.2367	8.96136	11.9941
AT1G25530	Transmembrane amino acid transporter family protein	1.93033	2.72075	2.24487	2.29865
AT1G25540	PHYTOCHROME AND FLOWERING TIME 1 (PFT1)	5.69788	6.10311	9.04926	6.95008
AT1G25550	myb-like transcription factor family protein	100.996	160.896	128.972	130.288
AT1G25560	TEMPRANILLO 1 (TEM1)	51.1183	52.2434	60.7315	54.6977
AT1G25570	Di-glucose binding protein with Leucine-rich repeat domain-containing protein	11.8289	10.8389	11.5262	11.398
AT1G25580	SUPPRESSOR OF GAMMA RADIATION 1 (SOG1)	3.28331	4.27913	6.04241	4.53495
AT1G25682	CWC16A	25.9507	32.7369	31.715	30.1342
AT1G25988	coiled-coil protein%2C putative (DUF572)	2.88397	4.10902	4.26979	3.75426
AT1G26090	P-loop containing nucleoside triphosphate hydrolases superfamily protein	9.35099	8.26303	8.10362	8.57255
AT1G26100	Cytochrome b561/ferric reductase transmembrane protein family	1.91448	1.97915	0.801045	1.56489
AT1G26110	DECAPPING 5 (DCP5)	53.9849	53.8699	53.6523	53.8357
AT1G26120	ISOPRENYLCYSTEINE METHYLESTERASE-LIKE 1 (ICME-LIKE1)	6.71217	6.36206	7.88217	6.98547
AT1G26130	ATPase E1-E2 type family protein / haloacid dehalogenase-like hydrolase family protein	3.69421	4.29203	6.20257	4.7296
AT1G26150	PROLINE-RICH EXTENSIN-LIKE RECEPTOR KINASE 10 (PERK10)	47.7131	48.5604	47.705	47.9928
AT1G26160	Metal-dependent phosphohydrolase	11.526	10.6887	8.49047	10.2351
AT1G26170	ARM repeat superfamily protein	3.92621	3.41855	3.14133	3.49537
AT1G26180	membrane protein	14.9461	12.3533	10.3532	12.5509
AT1G26190	Phosphoribulokinase / Uridine kinase family	1.96085	1.53784	1.93959	1.81276
AT1G26208		0.952	1.09201	1.18418	1.07606
AT1G26210	SOB FIVE-LIKE 1 (SOFL1)	3.82981	4.00018	1.39823	3.07607
AT1G26218	SHORT OPEN READING FRAME 14; SORF14	1.58646	1.27041	1.14129	1.33272
AT1G26230	CHAPERONIN-60BETA4 (CPN60BETA4)	7.8345	5.86089	5.3668	6.35406
AT1G26260	CRYPTOCHROME-INTERACTING BASIC-HELIX-LOOP-HELIX 5 (CIB5)	2.43523	1.53718	2.16101	2.04448
AT1G26270	Phosphatidylinositol 3- and 4-kinase family protein	30.2331	34.1102	17.4803	27.2745
AT1G26290	hypothetical protein	2.44787	2.68579	0.811585	1.98175
AT1G26300	BSD domain-containing protein	2.46435	2.63183	4.17603	3.09074
AT1G26340	CYTOCHROME B5 ISOFORM A (CB5-A)	8.0361	10.3411	9.09758	9.15827
AT1G26370	RNA helicase family protein	4.89674	4.90836	3.19324	4.33278
AT1G26380	FAD-binding Berberine family protein	1.82806	5.66166	25.4191	10.9696
AT1G26390	FAD-binding Berberine family protein	0.0825838	3.0787	10.9331	4.69814
AT1G26420	FAD-binding Berberine family protein	1.08903	5.90964	18.0108	8.3365
AT1G26440	UREIDE PERMEASE 5 (UPS5)	4.8555	4.96855	13.2299	7.68466
AT1G26450	Carbohydrate-binding X8 domain superfamily protein	1.41721	1.57145	0.360236	1.1163
AT1G26460	Tetratricopeptide repeat (TPR)-like superfamily protein	9.60473	9.15794	10.1981	9.65358
AT1G26470	SNRK2-SUBSTRATE 1; SNS1	10.3907	14.3748	7.57666	10.7807
AT1G26500	Pentatricopeptide repeat (PPR) superfamily protein	1.91825	1.67778	0.528225	1.37475
AT1G26520	Cobalamin biosynthesis CobW-like protein	1.45321	1.25806	1.18482	1.2987
AT1G26550	FKBP-like peptidyl-prolyl cis-trans isomerase family protein	46.207	52.9795	56.2992	51.8285
AT1G26560	BETA GLUCOSIDASE 40 (BGLU40)	37.0198	50.2761	10.3455	32.5471
AT1G26570	UDP-GLUCOSE DEHYDROGENASE 1 (UGD1)	7.04707	5.92915	4.70349	5.89324
AT1G26580	ELM2 domain protein	25.8306	21.9989	51.3224	33.0506
AT1G26620	T-box transcription factor%2C putative (DUF863)	3.72347	3.12703	4.91737	3.92262
AT1G26630	FUMONISIN B1-RESISTANT12 (FBR12)	296.011	313.867	244.869	284.916
AT1G26640	IPK; ISOPENTENYL PHOSPHATE KINASE	6.65743	6.05942	8.05647	6.92444
AT1G26650	Son of sevenless protein	15.2816	13.1326	9.97279	12.7956
AT1G26660	Prefoldin chaperone subunit family protein	1.8403	2.12963	2.2078	2.05924
AT1G26665	Mediator complex%2C subunit Med10	11.5874	5.75261	13.5303	10.2901
AT1G26670	(VTI1B)	44.0753	28.1974	51.5514	41.2747
AT1G26690	emp24/gp25L/p24 family/GOLD family protein	11.2254	16.2041	24.3167	17.2487
AT1G26730	EXS (ERD1/XPR1/SYG1) family protein	13.0723	22.1223	17.9709	17.7218
AT1G26740	Ribosomal L32p protein family	5.96555	5.68525	7.50578	6.38553
AT1G26750	hypothetical protein	12.2797	12.6546	12.1247	12.353
AT1G26761	Arabinanase/levansucrase/invertase	26.6907	23.5056	12.1972	20.7979
AT1G26770	EXPANSIN A10 (EXPA10)	16.6553	9.7478	7.20026	11.2011
AT1G26800	RING/U-box superfamily protein	14.0726	42.8757	13.6089	23.5191
AT1G26810	GALACTOSYLTRANSFERASE1 (GALT1)	3.27119	2.45968	2.01152	2.5808
AT1G26820	RIBONUCLEASE 3 (RNS3)	4.67557	4.83311	2.97116	4.15995
AT1G26830	CULLIN 3 (CUL3)	28.3433	29.5209	33.6319	30.4987
AT1G26850	S-adenosyl-L-methionine-dependent methyltransferases superfamily protein	82.9294	72.957	55.8176	70.568
AT1G26880	Ribosomal protein L34e superfamily protein	53.0714	64.3791	30.0618	49.1708
AT1G26900	Pentatricopeptide repeat (PPR) superfamily protein	1.88452	1.55446	2.54759	1.99553
AT1G26910	RIBOSOMAL PROTEIN L10 B (RPL10B)	5.50407	8.15367	4.07766	5.9118
AT1G26920	zinc finger CCHC domain protein	19.451	24.9005	17.2107	20.5207
AT1G26930	Galactose oxidase/kelch repeat superfamily protein	1.5359	0.724021	3.99318	2.08437
AT1G26940	Cyclophilin-like peptidyl-prolyl cis-trans isomerase family protein	3.31553	3.24507	3.70999	3.42353
AT1G26945	KIDARI (KDR)	2.92192	2.68131	1.57974	2.39432
AT1G26960	HOMEOBOX PROTEIN 23 (AtHB23)	9.77878	6.66513	5.60367	7.34919
AT1G27000	GRIP/coiled-coil protein%2C putative (DUF1664)	23.0374	24.0951	26.3604	24.4976
AT1G27020	plant/protein	25.7043	11.4064	20.1603	19.0904
AT1G27030	hypothetical protein	5.82181	7.40512	3.1236	5.45017
AT1G27050	homeobox leucine zipper protein	9.06947	8.92371	5.25957	7.75092
AT1G27060	Regulator of chromosome condensation (RCC1) family protein	5.15889	5.74057	3.32499	4.74148
AT1G27070	5'-AMP-activated protein kinase-like protein	6.27476	4.71874	5.15107	5.38152
AT1G27090	glycine-rich protein	64.5511	88.3751	80.81	77.9121
AT1G27100	Actin cross-linking protein	136.289	151.784	146.979	145.017
AT1G27120	Galactosyltransferase family protein	9.43626	6.72533	2.3346	6.1654
AT1G27130	GLUTATHIONE S-TRANSFERASE TAU 13 (GSTU13)	113.992	77.0669	65.0519	85.3702
AT1G27150	Tetratricopeptide repeat (TPR)-like superfamily protein	5.68308	4.20364	5.28335	5.05669
AT1G27170	transmembrane receptors / ATP binding protein	1.03734	0.915302	1.36259	1.10507
AT1G27180	disease resistance protein (TIR-NBS-LRR class)	1.80596	1.46345	1.5894	1.6196
AT1G27190	Leucine-rich repeat protein kinase family protein	23.9638	23.9462	21.6265	23.1789
AT1G27200	glycosyltransferase family protein (DUF23)	40.5313	40.8228	26.3444	35.8995
AT1G27210	ARM repeat superfamily protein	7.80268	5.10318	10.1138	7.67323
AT1G27290	transmembrane protein	127.014	172.328	112.686	137.343
AT1G27300	transmembrane protein	11.8326	15.123	20.382	15.7792
AT1G27310	NUCLEAR TRANSPORT FACTOR 2A (NTF2A)	47.7029	43.7325	44.1829	45.2061
AT1G27320	HISTIDINE KINASE 3 (HK3)	43.4082	43.1108	35.9427	40.8206
AT1G27330	Ribosome associated membrane protein RAMP4	44.5935	56.0592	77.2957	59.3161
AT1G27340	LEAF CURLING RESPONSIVENESS (LCR)	27.902	26.9614	20.1675	25.0103
AT1G27350	Ribosome associated membrane protein RAMP4	18.7846	25.4441	36.1375	26.7887
AT1G27360	SQUAMOSA PROMOTER-LIKE 11 (SPL11)	10.4518	7.60892	4.08553	7.38208
AT1G27370	SQUAMOSA PROMOTER BINDING PROTEIN-LIKE 10 (SPL10)	3.75085	2.97864	2.20019	2.97656
AT1G27385	phosphoribosylformylglycinamidine synthase	14.6154	15.5546	16.1563	15.4421
AT1G27390	TRANSLOCASE OUTER MEMBRANE 20-2 (TOM20-2)	13.6044	15.1686	10.5111	13.0947
AT1G27400	Ribosomal protein L22p/L17e family protein	42.8079	53.681	28.347	41.612
AT1G27410	DNA repair metallo-beta-lactamase family protein	2.87201	2.72245	4.47817	3.35754
AT1G27420	Galactose oxidase/kelch repeat superfamily protein	1.21072	1.30013	2.88104	1.7973
AT1G27430	GYF domain-containing protein	13.4273	10.8716	12.5964	12.2984
AT1G27435	hypothetical protein	13.9738	12.9575	10.3746	12.4353
AT1G27440	(GUT2)	4.67403	4.16585	3.43589	4.09192
AT1G27450	ADENINE PHOSPHORIBOSYL TRANSFERASE 1 (APT1)	48.9529	43.568	52.5341	48.3516
AT1G27460	NO POLLEN GERMINATION RELATED 1 (NPGR1)	7.94046	5.55314	8.48869	7.32743
AT1G27470	transducin family protein / WD-40 repeat family protein	3.51797	5.25394	3.26109	4.011
AT1G27480	alpha/beta-Hydrolases superfamily protein	50.9213	42.7179	28.4036	40.681
AT1G27500	Tetratricopeptide repeat (TPR)-like superfamily protein	3.23515	2.70168	2.64935	2.86206
AT1G27510	EXECUTER 2 (EX2)	27.9898	26.4594	22.5322	25.6604
AT1G27520	MANNOSIDASE 5; MNS5	10.6758	9.08134	11.2266	10.3279
AT1G27530	ubiquitin-fold modifier-conjugating enzyme	44.1133	47.5296	49.9553	47.1994
AT1G27540	F-box protein (DUF295)	10.4921	9.67583	11.6312	10.5997
AT1G27565	hypothetical protein	2.90053	3.97947	1.5902	2.8234
AT1G27580	F-box protein (DUF295)	6.78298	7.01344	7.23113	7.00918
AT1G27590		4.70712	5.58616	5.17975	5.15768
AT1G27595	TANG1	6.5767	6.87186	4.91046	6.11967
AT1G27600	IRREGULAR XYLEM 9-LIKE (IRX9-L)	10.7304	9.65262	11.718	10.7004
AT1G27630	CYCLIN T 1;3 (CYCT1;3)	2.28477	1.34267	4.16734	2.59826
AT1G27650	(ATU2AF35A)	29.389	29.6445	29.7479	29.5938
AT1G27660	basic helix-loop-helix (bHLH) DNA-binding superfamily protein	2.2898	2.10878	1.66196	2.02018
AT1G27680	ADPGLC-PPASE LARGE SUBUNIT (APL2)	3.30698	3.76813	3.65838	3.57783
AT1G27690	lipase%2C putative (DUF620)	6.53124	5.07167	7.0261	6.20967
AT1G27695	TGD5; TRIGALACTOSYLDIACYLGLYCEROL 5	7.64762	7.21774	7.43665	7.434
AT1G27700	Syntaxin/t-SNARE family protein	11.9834	8.52679	7.29378	9.26799
AT1G27730	SALT TOLERANCE ZINC FINGER (STZ)	777.015	821.165	991.878	863.353
AT1G27750	nucleic acid binding protein	11.483	11.6931	10.5318	11.236
AT1G27752	Ubiquitin system component Cue protein	8.80778	8.95503	10.069	9.27727
AT1G27760	SALT-TOLERANCE 32 (SAT32)	23.5338	23.3331	14.2457	20.3709
AT1G27770	AUTOINHIBITED CA2+-ATPASE 1 (ACA1)	312.039	331.401	259.454	300.965
AT1G27840	(ATCSA-1)	5.13111	4.7331	6.03218	5.2988
AT1G27850	RUN/FYVE domain protein	13.7031	12.4311	9.2716	11.8019
AT1G27900	RNA helicase family protein	4.17633	4.48857	3.64705	4.10398
AT1G27910	PLANT U-BOX 45 (PUB45)	8.32443	7.35563	5.36352	7.01453
AT1G27920	MICROTUBULE-ASSOCIATED PROTEIN 65-8 (MAP65-8)	6.19821	4.93654	3.98658	5.04044
AT1G27921		1.40122	1.02111	1.06153	1.16129
AT1G27930	glucuronoxylan 4-O-methyltransferase-like protein (DUF579)	12.1662	11.5533	19.4124	14.3773
AT1G27940	ATP-BINDING CASSETTE B13 (ABCB13)	2.13591	2.18292	0.408209	1.57568
AT1G27950	GLYCOSYLPHOSPHATIDYLINOSITOL-ANCHORED LIPID PROTEIN TRANSFER 1 (LTPG1)	164.345	136.927	72.6948	124.655
AT1G27960	EVOLUTIONARILY CONSERVED C-TERMINAL REGION 9 (ECT9)	2.51758	1.82085	1.17364	1.83736
AT1G27970	NUCLEAR TRANSPORT FACTOR 2B (NTF2B)	72.0068	73.5508	58.2	67.9192
AT1G27980	DIHYDROSPHINGOSINE PHOSPHATE LYASE (DPL1)	5.48735	5.39368	6.95109	5.94404
AT1G28010	ATP-BINDING CASSETTE B14 (ABCB14)	3.81036	3.82102	2.39639	3.34259
AT1G28050	B-BOX DOMAIN PROTEIN 13; BBX13	3.6351	2.52377	13.8328	6.6639
AT1G28060	Pre-mRNA-splicing factor 3	10.461	12.7142	9.33083	10.8353
AT1G28070	ATP-dependent RNA helicase	1.4516	1.95647	5.28865	2.89891
AT1G28090	Polynucleotide adenylyltransferase family protein	3.32902	2.65533	3.54915	3.17783
AT1G28100	hypothetical protein	1.77984	1.49969	1.5825	1.62068
AT1G28110	SERINE CARBOXYPEPTIDASE-LIKE 45 (SCPL45)	4.98583	4.03926	3.37196	4.13235
AT1G28120	ubiquitin thioesterase otubain-like protein	13.4419	12.6418	11.5919	12.5586
AT1G28140	integral membrane family protein	59.8593	59.9082	54.9461	58.2379
AT1G28150	hypothetical protein	31.9341	24.0876	24.3324	26.7847
AT1G28190	hypothetical protein	17.3944	23.5657	39.4992	26.8198
AT1G28200	FH INTERACTING PROTEIN 1 (FIP1)	13.0839	12.6008	17.3928	14.3592
AT1G28230	PURINE PERMEASE 1 (PUP1)	1.53697	1.46642	4.57613	2.52651
AT1G28240	strawberry notch protein (DUF616)	17.4333	18.2397	22.7344	19.4691
AT1G28250	transmembrane protein	8.65598	7.9244	10.8276	9.136
AT1G28260	Telomerase activating protein Est1	4.19757	3.11887	8.13045	5.14896
AT1G28280	VQ motif-containing protein	58.2069	59.2924	62.0764	59.8586
AT1G28290	ARABINOGALACTAN PROTEIN 31 (AGP31)	7.86791	7.88572	3.5477	6.43377
AT1G28310	Dof-type zinc finger DNA-binding family protein	6.0631	5.91156	5.17143	5.71536
AT1G28320	(DEG15)	8.03479	6.38546	11.8187	8.74633
AT1G28330	DORMANCY-ASSOCIATED PROTEIN-LIKE 1 (DYL1)	12.3956	7.01889	76.6333	32.0159
AT1G28340	RECEPTOR LIKE PROTEIN 4 (RLP4)	16.2312	17.4925	14.8855	16.2031
AT1G28350	Nucleotidylyl transferase superfamily protein	5.56873	5.38827	4.58992	5.18231
AT1G28370	ERF DOMAIN PROTEIN 11 (ERF11)	159.039	190.675	235.839	195.184
AT1G28380	NECROTIC SPOTTED LESIONS 1 (NSL1)	219.167	244.956	159.503	207.875
AT1G28390	Protein kinase superfamily protein	1.20412	1.69691	1.39918	1.4334
AT1G28395	hypothetical protein	3.73084	4.73931	2.52103	3.66373
AT1G28400	GATA zinc finger protein	49.2545	44.2096	41.9077	45.1239
AT1G28410	myosin heavy chain-like protein	5.9092	3.78824	4.08738	4.59494
AT1G28420	HOMEOBOX-1 (HB-1)	9.20072	9.13139	8.61417	8.98209
AT1G28440	HAESA-LIKE 1 (HSL1)	26.7166	19.9312	18.1178	21.5885
AT1G28480	(GRX480)	89.2984	240.7	227.344	185.781
AT1G28490	SYNTAXIN OF PLANTS 61 (SYP61)	9.71091	9.82512	10.8064	10.1141
AT1G28510	Optic atrophy 3 protein (OPA3)	10.0473	10.5242	9.16286	9.91145
AT1G28520	VASCULAR PLANT ONE ZINC FINGER PROTEIN (VOZ1)	20.3454	18.8258	19.1489	19.4401
AT1G28530	ANGULATA 10; ANU10	1.67243	1.68008	1.65467	1.66906
AT1G28540	transmembrane protein	5.82719	5.39255	6.65462	5.95812
AT1G28560	SHOOT REDIFFERENTIATION DEFECTIVE 2 (SRD2)	1.78517	2.27391	0.888184	1.64909
AT1G28570	SGNH hydrolase-type esterase superfamily protein	4.14743	4.3748	2.55568	3.69264
AT1G28580	GDSL-like Lipase/Acylhydrolase superfamily protein	18.5969	18.1202	32.7293	23.1488
AT1G28600	GDSL-like Lipase/Acylhydrolase superfamily protein	91.3839	92.7534	66.9686	83.702
AT1G28610	GDSL-like Lipase/Acylhydrolase superfamily protein	5.40389	6.61318	3.99538	5.33748
AT1G28660	GDSL-like Lipase/Acylhydrolase superfamily protein	6.76589	5.40318	4.26321	5.47743
AT1G28670	(ARAB-1)	13.7832	12.312	9.09434	11.7299
AT1G28680	HXXXD-type acyl-transferase family protein	2.27369	2.33593	1.70869	2.1061
AT1G28690	Tetratricopeptide repeat (TPR)-like superfamily protein	1.63014	1.60276	1.6969	1.64327
AT1G28710	Nucleotide-diphospho-sugar transferase family protein	3.46437	3.3291	2.72148	3.17165
AT1G28760	INNER NUCLEAR MEMBRANE PROTEIN A; NEMP_A	2.89969	3.82215	2.39222	3.03802
AT1G28815	hypothetical protein	1.70029	1.51694	1.06714	1.42812
AT1G28960	NUDIX HYDROLASE HOMOLOG 15 (NUDX15)	12.2452	12.4425	12.4874	12.3917
AT1G29030	Apoptosis inhibitory protein 5 (API5)	0.738762	1.29654	1.28318	1.10616
AT1G29040	50S ribosomal protein L34	11.4908	11.4707	11.2688	11.4101
AT1G29050	TRICHOME BIREFRINGENCE-LIKE 38 (TBL38)	6.65906	9.86684	2.49496	6.34029
AT1G29060	Target SNARE coiled-coil domain protein	3.66909	3.93648	4.48529	4.03029
AT1G29070	Ribosomal protein L34	276.561	255.91	173.196	235.222
AT1G29120	UP9	11.2009	10.2574	6.38859	9.2823
AT1G29150	NON-ATPASE SUBUNIT 9 (ATS9)	46.1229	75.6729	56.8837	59.5598
AT1G29160	Dof-type zinc finger DNA-binding family protein	3.92942	7.27495	3.85503	5.0198
AT1G29170	(WAVE2)	6.15836	6.17325	1.34889	4.56017
AT1G29220	transcriptional regulator family protein	11.2187	11.9589	10.2754	11.151
AT1G29240	transcription initiation factor TFIID subunit%2C putative (DUF688)	3.02532	3.89212	8.76554	5.22766
AT1G29250	Alba DNA/RNA-binding protein	12.996	15.8212	9.00737	12.6082
AT1G29260	PEROXIN 7 (PEX7)	19.704	26.1137	23.4794	23.099
AT1G29290	B-cell lymphoma 6 protein	8.15525	9.07948	23.778	13.6709
AT1G29300	UNFERTILIZED EMBRYO SAC 1 (UNE1)	3.44936	2.62243	4.55382	3.54187
AT1G29310	SecY protein transport family protein	9.21738	9.84139	17.7939	12.2842
AT1G29320	Transducin/WD40 repeat-like superfamily protein	2.72118	4.1158	2.22401	3.02033
AT1G29330	ENDOPLASMIC RETICULUM RETENTION DEFECTIVE 2 (ERD2)	4.95481	10.0846	6.84621	7.2952
AT1G29340	PLANT U-BOX 17 (PUB17)	153.524	182.768	140.257	158.849
AT1G29350	RNA polymerase II degradation factor-like protein (DUF1296)	13.9369	12.7453	16.7302	14.4708
AT1G29357		2.16824	1.45523	4.53418	2.71922
AT1G29370	RNA polymerase II degradation factor-like protein (DUF1296)	13.7395	12.6066	16.6603	14.3355
AT1G29380	Carbohydrate-binding X8 domain superfamily protein	2.79385	3.13703	1.96711	2.63266
AT1G29390	COLD REGULATED 314 THYLAKOID MEMBRANE 2 (COR314-TM2)	31.8967	26.3283	33.7863	30.6704
AT1G29395	COLD REGULATED 314 INNER MEMBRANE 1 (COR413IM1)	14.0742	12.6281	54.3004	27.0009
AT1G29400	MEI2-LIKE PROTEIN 5 (ML5)	25.2913	22.663	34.9245	27.6262
AT1G29410	PHOSPHORIBOSYLANTHRANILATE ISOMERASE 3 (PAI3)	2.75256	2.39254	2.59295	2.57935
AT1G29418	transmembrane protein	14.5595	17.3884	8.19987	13.3826
AT1G29430	SAUR62; SMALL AUXIN UPREGULATED RNA 62	11.8853	13.3289	4.00114	9.73847
AT1G29440	SMALL AUXIN UP RNA 63 (SAUR63)	12.3345	11.8597	4.91804	9.70409
AT1G29450	SAUR64; SMALL AUXIN UPREGULATED RNA 64	12.2655	7.75718	4.7749	8.26587
AT1G29460	SAUR65; SMALL AUXIN UPREGULATED RNA 65	6.34265	6.68554	3.58269	5.53696
AT1G29465	transmembrane protein	3.41703	3.8514	5.71488	4.32777
AT1G29470	S-adenosyl-L-methionine-dependent methyltransferases superfamily protein	83.4952	63.0778	48.8466	65.1399
AT1G29520	AWPM-19-like family protein	17.4808	17.943	8.24105	14.5549
AT1G29530	hypothetical protein	22.066	20.488	8.22509	16.9263
AT1G29550	Eukaryotic initiation factor 4E protein	4.05546	3.61558	5.35834	4.34313
AT1G29560	Zinc finger C-x8-C-x5-C-x3-H type family protein	1.25928	1.04254	1.92056	1.40746
AT1G29600	Zinc finger C-x8-C-x5-C-x3-H type family protein	1.97064	2.43141	1.69776	2.03327
AT1G29640	senescence regulator (Protein of unknown function%2C DUF584)	2.33326	4.0146	1.10708	2.48498
AT1G29660	GDSL-like Lipase/Acylhydrolase superfamily protein	197.305	174.803	65.3915	145.833
AT1G29670	GDSL-like Lipase/Acylhydrolase superfamily protein	96.7528	65.8448	111.004	91.2006
AT1G29690	CONSTITUTIVELY ACTIVATED CELL DEATH 1 (CAD1)	86.0367	101.636	79.3957	89.0227
AT1G29700	Metallo-hydrolase/oxidoreductase superfamily protein	49.2959	55.8671	34.7751	46.646
AT1G29710	Tetratricopeptide repeat (TPR)-like superfamily protein	4.0783	3.09923	2.50523	3.22758
AT1G29715		0.485317	0.927819	5.10805	2.17373
AT1G29720	Leucine-rich repeat transmembrane protein kinase	61.2257	34.2562	13.6312	36.371
AT1G29750	RECEPTOR-LIKE KINASE IN FLOWERS 1 (RKF1)	3.90065	3.16721	4.23334	3.76707
AT1G29760	SEIPIN2	8.98578	12.1053	13.621	11.5707
AT1G29770	Haloacid dehalogenase-like hydrolase (HAD) superfamily protein	0.801605	0.885439	1.93695	1.208
AT1G29785		2.07852	1.93007	2.74648	2.25169
AT1G29790	S-adenosyl-L-methionine-dependent methyltransferases superfamily protein	15.3975	12.5114	14.0646	13.9911
AT1G29800	RING/FYVE/PHD-type zinc finger family protein	8.68651	7.78898	9.95441	8.80997
AT1G29810	Transcriptional coactivator/pterin dehydratase	4.76102	3.93442	3.81707	4.17084
AT1G29820	Magnesium transporter CorA-like family protein	5.46563	4.50867	4.6014	4.85857
AT1G29840	alpha/beta-Hydrolases superfamily protein	4.32106	4.82668	3.59723	4.24832
AT1G29850	double-stranded DNA-binding family protein	27.9008	28.044	28.4073	28.1174
AT1G29880	glycyl-tRNA synthetase / glycine-tRNA ligase	61.7816	79.4717	48.5984	63.2839
AT1G29890	REDUCED WALL ACETYLATION 4 (RWA4)	9.0997	9.81745	6.36775	8.4283
AT1G29900	CARBAMOYL PHOSPHATE SYNTHETASE B (CARB)	46.6671	44.6237	28.9489	40.0799
AT1G29910	CHLOROPHYLL A/B BINDING PROTEIN 3 (CAB3)	3924.97	3554.23	4485.17	3988.12
AT1G29920	CHLOROPHYLL A/B-BINDING PROTEIN 2 (CAB2)	12225.8	10082.3	7178.87	9828.97
AT1G29930	CHLOROPHYLL A/B BINDING PROTEIN 1 (CAB1)	29278.7	20943.6	19900.6	23374.3
AT1G29940	NUCLEAR RNA POLYMERASE A2 (NRPA2)	3.4276	6.1714	3.39687	4.33196
AT1G29950	SACL3	1.69384	1.20895	1.07372	1.3255
AT1G29960	Peptidase S24/S26A/S26B/S26C family protein	2.38681	2.56671	2.9492	2.63424
AT1G29970	60S RIBOSOMAL PROTEIN L18A-1 (RPL18AA)	14.0296	14.4103	19.0835	15.8411
AT1G29980	choice-of-anchor C domain protein%2C putative (Protein of unknown function%2C DUF642)	6.43387	4.92496	4.61517	5.32467
AT1G29990	PREFOLDIN 6 (PFD6)	12.568	12.5588	14.9696	13.3655
AT1G30000	ALPHA-MANNOSIDASE 3 (MNS3)	12.3005	12.7127	15.6852	13.5661
AT1G30010	NUCLEAR MATURASE 1 (NMAT1)	3.13586	2.78607	2.90818	2.94337
AT1G30040	GIBBERELLIN 2-OXIDASE (GA2OX2)	9.86634	8.79389	11.9181	10.1928
AT1G30070	SGS domain-containing protein	6.10922	56.5429	5.33431	22.6621
AT1G30090	Galactose oxidase/kelch repeat superfamily protein	13.0903	11.8555	14.5345	13.1601
AT1G30110	NUDIX HYDROLASE HOMOLOG 25 (NUDX25)	2.36633	3.41178	1.78219	2.5201
AT1G30120	PYRUVATE DEHYDROGENASE E1 BETA (PDH-E1 BETA)	56.0536	64.8705	41.5023	54.1421
AT1G30130	DUF1365 family protein	10.5875	10.8876	8.42785	9.96765
AT1G30135	JASMONATE-ZIM-DOMAIN PROTEIN 8 (JAZ8)	42.2868	55.2598	62.0515	53.1994
AT1G30190	cotton fiber protein	19.4823	14.1168	8.0693	13.8895
AT1G30200	F-box family protein	23.0625	20.886	24.693	22.8805
AT1G30210	TEOSINTE BRANCHED 1, CYCLOIDEA, AND PCF FAMILY 24 (TCP24)	9.35999	5.34999	9.10984	7.93994
AT1G30230	EUKARYOTIC ELONGATION FACTOR 1B BETA 1 (EEF-1BB1)	186.622	175.104	139.374	167.033
AT1G30240	proline-%2C glutamic acid/leucine-rich protein	2.852	3.27144	2.54398	2.88914
AT1G30250	hypothetical protein	99.7674	94.1604	55.8061	83.2446
AT1G30260	galactosyltransferase family protein	69.2544	69.1554	44.0769	60.8289
AT1G30270	CBL-INTERACTING PROTEIN KINASE 23 (CIPK23)	5.15222	4.14316	6.28863	5.19467
AT1G30280	Chaperone DnaJ-domain superfamily protein	2.84876	3.87131	1.49128	2.73712
AT1G30290	Tetratricopeptide repeat (TPR)-like superfamily protein	3.75865	3.51813	2.75154	3.34277
AT1G30300	Metallo-hydrolase/oxidoreductase superfamily protein	2.50232	2.85272	3.51196	2.95567
AT1G30320	Remorin family protein	12.8585	14.0714	8.24227	11.7241
AT1G30330	AUXIN RESPONSE FACTOR 6 (ARF6)	8.50297	5.85042	10.2657	8.20637
AT1G30360	EARLY-RESPONSIVE TO DEHYDRATION 4 (ERD4)	290.863	319.885	303.498	304.749
AT1G30370	DAD1-LIKE ACYLHYDROLASE (DLAH)	7.11951	6.4072	8.41802	7.31491
AT1G30380	PHOTOSYSTEM I SUBUNIT K (PSAK)	2083.77	1954.43	1411.78	1816.66
AT1G30400	ATP-BINDING CASSETTE C1 (ABCC1)	34.1088	32.89	22.321	29.7732
AT1G30410	ATP-BINDING CASSETTE C12 (ABCC12)	6.19109	6.35173	14.1512	8.89802
AT1G30420	ATP-BINDING CASSETTE C11 (ABCC11)	4.15376	2.81092	7.02241	4.66236
AT1G30440	Phototropic-responsive NPH3 family protein	19.421	18.4023	15.9165	17.9133
AT1G30450	CATION-CHLORIDE CO-TRANSPORTER 1 (CCC1)	4.85389	4.08669	6.5094	5.14999
AT1G30455	cyclin/Brf1-like TBP-binding domain-containing protein	1.07055	1.38645	0.848545	1.10185
[truncated: 14,698 more rows]
