# Supplementary material for: The H3K27me3 epigenetic mark is crucial for callus cell identity and for the acquisition of new fate during root and shoot regeneration
Source: bioRxiv preprint, doi:10.1101/2022.05.12.491615, version 1 (2022-05-13)
Supplement: S3 [file 491615_file08.xlsx]

## Sheet: Callus_Vs_leaves_DEG
Supplementary Data 3 Callus Vs. Leaves DEG
Columns C and D: meanRPKM values calculated from three biological replication.
Columns E and F: log2 Fold Change and FDR where calculated using the edgeR software package with cutoff of: |log2FC| > 0.6 and FDR < 0.05.
Gene.ID	gene.name	Callus_mean_RPKM	Leaveas_mean_RPKM	log2 Fold Change	FDR
AT1G01010	NAC DOMAIN CONTAINING PROTEIN 1 (NAC001)	20.2611	3.49265	-2.53468	1.80017e-11
AT1G01030	NGATHA3 (NGA3)	0.117048	3.15026	4.72644	3.85644e-09
AT1G01050	PYROPHOSPHORYLASE 1 (PPa1)	28.553	56.1905	0.976401	0.00118271
AT1G01060	LATE ELONGATED HYPOCOTYL (LHY)	9.08617	190.234	4.38792	1.17562e-13
AT1G01080	RNA-binding (RRM/RBD/RNP motifs) family protein	3.8146	58.3418	3.93314	5.32237e-33
AT1G01090	PYRUVATE DEHYDROGENASE E1 ALPHA (PDH-E1 ALPHA)	41.7111	123.041	1.56054	2.21772e-06
AT1G01100	60S acidic ribosomal protein family	242.925	111.178	-1.12778	0.000717025
AT1G01120	3-KETOACYL-COA SYNTHASE 1 (KCS1)	12.605	126.167	3.32262	1.14854e-13
AT1G01130	CBL-interacting Serine/Threonine-kinase	0.779282	2.08599	1.41433	0.0053907
AT1G01140	CBL-INTERACTING PROTEIN KINASE 9 (CIPK9)	1.37442	133.777	6.60746	6.42048e-28
AT1G01160	GRF1-INTERACTING FACTOR 2 (GIF2)	24.2755	13.781	-0.816698	0.00193986
AT1G01170	ozone-responsive stress-like protein (DUF1138)	2.48266	56.1885	4.49492	5.75288e-10
AT1G01180	S-adenosyl-L-methionine-dependent methyltransferases superfamily protein	1.50885	19.2406	3.6685	2.53172e-20
AT1G01190	"CYTOCHROME P450, FAMILY 78, SUBFAMILY A, POLYPEPTIDE 8" (CYP78A8)	0.17867	4.56113	4.64231	1.86022e-09
AT1G01200	RAB GTPASE HOMOLOG A3 (RABA3)	2.25405	0.813924	-1.47726	0.0042339
AT1G01225	NC domain-containing protein-like protein	4.55227	1.54046	-1.56474	0.000741389
AT1G01290	COFACTOR OF NITRATE REDUCTASE AND XANTHINE DEHYDROGENASE 3 (CNX3)	12.046	6.09435	-0.98244	0.00102479
AT1G01300	Eukaryotic aspartyl protease family protein	129.28	31.4419	-2.03929	1.28494e-07
AT1G01320	REC1; REDUCED CHLOROPLAST COVERAGE	4.48372	104.49	4.54242	1.95832e-33
AT1G01340	CYCLIC NUCLEOTIDE GATED CHANNEL 10 (CNGC10)	1.854	9.30241	2.32767	2.00196e-11
AT1G01360	REGULATORY COMPONENT OF ABA RECEPTOR 1 (RCAR1)	11.5976	24.343	1.06865	0.0078742
AT1G01370	(HTR12)	2.01834	0.534949	-1.91768	0.000145709
AT1G01390	UDP-Glycosyltransferase superfamily protein	0	10.8879	12.6718	3.29067e-29
AT1G01420	UDP-GLUCOSYL TRANSFERASE 72B3 (UGT72B3)	0.0108684	4.59022	8.50163	5.63702e-23
AT1G01430	TRICHOME BIREFRINGENCE-LIKE 25 (TBL25)	2.84562	35.7542	3.65135	6.4459e-30
AT1G01440	hypothetical protein (DUF3133)	7.03706	12.0587	0.777074	0.00582345
AT1G01470	LATE EMBRYOGENESIS ABUNDANT 14 (LEA14)	69.07	603.599	3.12758	5.72162e-08
AT1G01480	1-AMINO-CYCLOPROPANE-1-CARBOXYLATE SYNTHASE 2 (ACS2)	31.1337	2.3512	-3.72477	1.74432e-09
AT1G01490	Heavy metal transport/detoxification superfamily protein	22.8796	41.5364	0.860104	0.00182754
AT1G01510	ANGUSTIFOLIA (AN)	20.1329	12.019	-0.744504	0.00535946
AT1G01540	Protein kinase superfamily protein	22.0071	52.9086	1.26547	2.42467e-05
AT1G01550	BYPASS 1 (BPS1)	104.728	171.971	0.715548	0.0205363
AT1G01560	MAP KINASE 11 (MPK11)	2.68304	96.494	5.16897	1.74463e-20
AT1G01580	FERRIC REDUCTION OXIDASE 2 (FRO2)	0.332903	1.24139	1.88951	0.0266583
AT1G01600	"CYTOCHROME P450, FAMILY 86, SUBFAMILY A, POLYPEPTIDE 4" (CYP86A4)	1.9765	0.376383	-2.40098	0.000187827
AT1G01610	GLYCEROL-3-PHOSPHATE ACYLTRANSFERASE 4 (GPAT4)	7.37234	24.6587	1.74087	3.42277e-05
AT1G01620	PLASMA MEMBRANE INTRINSIC PROTEIN 1C (PIP1C)	31.2536	269.629	3.1086	4.25986e-13
AT1G01640	BTB/POZ domain-containing protein	16.9358	2.19873	-2.93708	2.55717e-17
AT1G01690	PUTATIVE RECOMBINATION INITIATION DEFECTS 3 (PRD3)	5.05144	0.50056	-3.33126	4.63158e-21
AT1G01720	(ATAF1)	57.9819	135.681	1.22651	0.00120301
AT1G01730	hypothetical protein	46.3189	17.2788	-1.42136	6.01569e-07
AT1G01750	ACTIN DEPOLYMERIZING FACTOR 11 (ADF11)	2.11098	0.857955	-1.29808	0.0288477
AT1G01770	propionyl-CoA carboxylase	9.25101	5.37247	-0.783421	0.0242554
AT1G01790	K+ EFFLUX ANTIPORTER 1 (KEA1)	0.567726	62.6904	6.7837	1.96228e-41
AT1G01810	hypothetical protein	3.39055	0.264299	-3.61306	3.35315e-08
AT1G01820	PEROXIN 11C (PEX11C)	35.8067	22.8421	-0.648078	0.0279592
AT1G01830	ARM repeat superfamily protein	3.51031	8.42294	1.26156	0.000379575
AT1G01860	PALEFACE 1 (PFC1)	1.78168	3.64183	1.03011	0.0118906
AT1G01880	5'-3' exonuclease family protein	1.09127	0.36122	-1.60122	0.000687059
AT1G01920	SET domain-containing protein	8.24061	3.15596	-1.38417	3.4743e-06
AT1G01940	Cyclophilin-like peptidyl-prolyl cis-trans isomerase family protein	8.2166	3.1342	-1.39069	1.78052e-05
AT1G01950	ARMADILLO REPEAT KINESIN 2 (ARK2)	5.38493	13.8157	1.3588	4.94921e-06
AT1G01970	Tetratricopeptide repeat (TPR)-like superfamily protein	4.26534	19.526	2.19402	2.66852e-11
AT1G02000	UDP-D-GLUCURONATE 4-EPIMERASE 2 (GAE2)	5.25743	12.3808	1.23496	0.000410287
AT1G02010	SECRETORY 1A (SEC1A)	1.17936	2.61233	1.14558	0.00560081
AT1G02020	nitroreductase family protein	2.64021	13.8018	2.38395	2.31886e-10
AT1G02050	LESS ADHESIVE POLLEN 6 (LAP6)	7.44267	3.13796	-1.24558	0.00109462
AT1G02060	Tetratricopeptide repeat (TPR)-like superfamily protein	6.35766	2.79787	-1.18145	0.00187822
AT1G02080	transcription regulator	24.0339	13.1254	-0.872637	0.0044042
AT1G02110	bZIP domain class transcription factor (DUF630 and DUF632)	24.8824	10.6266	-1.22811	2.62821e-05
AT1G02150	Tetratricopeptide repeat (TPR)-like superfamily protein	13.8505	56.8002	2.03545	2.51471e-11
AT1G02170	METACASPASE 1 (MC1)	13.2312	41.3602	1.6446	7.99264e-09
AT1G02205	ECERIFERUM 1 (CER1)	0.293874	17.7798	5.91	5.12092e-08
AT1G02220	NAC DOMAIN CONTAINING PROTEIN 3 (NAC003)	57.5686	4.50674	-3.67593	1.10503e-12
AT1G02230	NAC DOMAIN CONTAINING PROTEIN 4 (NAC004)	3.70386	0.436703	-3.0673	5.17704e-08
AT1G02260	Divalent ion symporter	2.99325	8.20827	1.45616	0.000144775
AT1G02270	Calcium-binding endonuclease/exonuclease/phosphatase family	3.54283	24.4945	2.78928	8.251e-20
AT1G02280	TRANSLOCON AT THE OUTER ENVELOPE MEMBRANE OF CHLOROPLASTS 33 (TOC33)	8.84621	43.5369	2.29852	1.54519e-13
AT1G02290	hypothetical protein	6.41501	2.76275	-1.21554	0.000893551
AT1G02300	Cysteine proteinases superfamily protein	0.514737	3.59659	2.80418	5.77818e-06
AT1G02310	ENDO-BETA-MANNANASE 1 (MAN1)	1.50691	0.322486	-2.20619	0.00811614
AT1G02330	integrator complex subunit-like protein	21.1535	13.1443	-0.68609	0.0152475
AT1G02335	GERMIN-LIKE PROTEIN SUBFAMILY 2 MEMBER 2 PRECURSOR (GL22)	0.613837	11.7896	4.2633	1.27235e-07
AT1G02340	LONG HYPOCOTYL IN FAR-RED (HFR1)	0.0523959	3.43846	6.06458	3.97333e-08
AT1G02370	Tetratricopeptide repeat (TPR)-like superfamily protein	8.67594	1.4991	-2.53203	4.35835e-14
AT1G02390	GLYCEROL-3-PHOSPHATE ACYLTRANSFERASE 2 (GPAT2)	0.459478	20.8008	5.49313	1.16013e-38
AT1G02400	GIBBERELLIN 2-OXIDASE 6 (GA2OX6)	6.30737	45.407	2.84871	7.06805e-12
AT1G02420	Pentatricopeptide repeat (PPR) superfamily protein	3.48108	1.82917	-0.92546	0.0258891
AT1G02475	Polyketide cyclase/dehydrase and lipid transport superfamily protein	3.47896	45.0523	3.69538	1.60397e-31
AT1G02500	S-ADENOSYLMETHIONINE SYNTHETASE 1 (SAM1)	347.588	221.926	-0.647288	0.0435266
AT1G02520	ATP-BINDING CASSETTE B11 (ABCB11)	25.0896	0.173653	-7.15393	3.08441e-52
AT1G02530	ATP-BINDING CASSETTE B12 (ABCB12)	1.65285	0.0236949	-6.05699	1.10976e-25
AT1G02560	NUCLEAR ENCODED CLP PROTEASE 5 (CLPP5)	18.072	137.88	2.93147	5.79856e-23
AT1G02610	RING/FYVE/PHD zinc finger superfamily protein	0.647463	5.61372	3.11649	2.08707e-09
AT1G02640	BETA-XYLOSIDASE 2 (BXL2)	0.35323	8.68102	4.61943	1.07077e-20
AT1G02660	alpha/beta-Hydrolases superfamily protein	3.20749	109.559	5.09425	3.38567e-45
AT1G02690	IMPORTIN ALPHA ISOFORM 6 (IMPA-6)	15.4071	1.66579	-3.21316	3.27218e-21
AT1G02700	GATA transcription factor-like protein	0	3.01269	10.2671	4.32112e-21
AT1G02710	glycine-rich protein	0	23.5244	11.2471	4.93228e-25
AT1G02720	GALACTURONOSYLTRANSFERASE 5 (GATL5)	2.59608	5.78462	1.154	0.00410466
AT1G02730	CELLULOSE SYNTHASE-LIKE D5 (CSLD5)	15.9112	5.61974	-1.50228	0.000121219
AT1G02770	hypothetical protein	1.14081	0.188142	-2.60087	0.00217505
AT1G02780	EMBRYO DEFECTIVE 2386 (emb2386)	492.107	247.139	-0.993683	0.00244642
AT1G02810	Plant invertase/pectin methylesterase inhibitor superfamily	15.2787	1.0134	-3.92194	8.67512e-21
AT1G02820	LATE EMBRYOGENESIS ABUNDANT 3 (LEA3)	0.294806	125.544	8.72334	4.57508e-14
AT1G02840	SERINE/ARGININE-RICH PROTEIN SPLICING FACTOR 34 (SR34)	51.7461	24.6713	-1.06866	0.000725526
AT1G02850	BETA GLUCOSIDASE 11 (BGLU11)	88.1369	1.97862	-5.47376	1.94216e-33
AT1G02860	NITROGEN LIMITATION ADAPTATION (NLA)	14.3263	7.41185	-0.95019	0.0169189
AT1G02870	nucleolar-like protein	22.9764	7.96036	-1.53051	7.32798e-08
AT1G02880	THIAMIN PYROPHOSPHOKINASE1 (TPK1)	7.04735	11.9572	0.762815	0.0304395
AT1G02890	AAA-type ATPase family protein	30.7329	18.3374	-0.744941	0.0138604
AT1G02900	RAPID ALKALINIZATION FACTOR 1 (RALF1)	3.87828	1.90897	-1.03374	0.0481706
AT1G02910	LOW PSII ACCUMULATION1 (LPA1)	5.37593	40.2892	2.90507	2.79681e-25
AT1G02950	GLUTATHIONE S-TRANSFERASE F4 (GSTF4)	0.200285	4.93451	4.58681	6.21897e-07
AT1G02970	WEE1 KINASE HOMOLOG (WEE1)	2.6756	0.378112	-2.82148	1.3235e-11
AT1G03020	Thioredoxin superfamily protein	0.0219432	12.6793	8.86365	1.82169e-19
AT1G03055	beta-carotene isomerase D27-like protein	0.0754801	7.83812	6.70753	5.03296e-21
AT1G03080	NETWORKED 1D (NET1D)	35.0631	19.7817	-0.825858	0.00700475
AT1G03100	Pentatricopeptide repeat (PPR) superfamily protein	2.19369	0.952229	-1.19836	0.00367343
AT1G03110	TRNA MODIFICATION 82 (TRM82)	6.83392	2.28968	-1.58077	1.54493e-05
AT1G03130	PHOTOSYSTEM I SUBUNIT D-2 (PSAD-2)	3.9957	1499.08	8.54876	1.67249e-47
AT1G03160	FZO-LIKE (FZL)	2.52148	15.4271	2.61227	8.0077e-21
AT1G03180	non-structural protein	2.23669	0.586836	-1.9321	1.88712e-05
AT1G03190	ULTRAVIOLET HYPERSENSITIVE 6 (UVH6)	4.74369	2.09985	-1.1753	9.44927e-05
AT1G03200	hypothetical protein	9.71124	2.00613	-2.26662	4.60364e-06
AT1G03210	Phenazine biosynthesis PhzC/PhzF protein	29.5177	13.8494	-1.09008	0.000489507
AT1G03220	Eukaryotic aspartyl protease family protein	661.809	97.6296	-2.76101	6.56701e-11
AT1G03230	Eukaryotic aspartyl protease family protein	87.6369	24.0193	-1.86691	7.55123e-09
AT1G03270	CBS domain protein with a domain protein (DUF21)	1.71172	0.865699	-0.989084	0.0378095
AT1G03310	DEBRANCHING ENZYME 1 (DBE1)	7.68198	12.85	0.741777	0.0138544
AT1G03340	hypothetical protein	0.067565	1.588	4.57005	2.6199e-11
AT1G03360	RIBOSOMAL RNA PROCESSING 4 (RRP4)	11.617	4.32494	-1.42846	0.000156125
AT1G03370	C2 calcium/lipid-binding and GRAM domain containing protein	11.2611	40.493	1.84634	1.11103e-10
AT1G03400	2-oxoglutarate (2OG) and Fe(II)-dependent oxygenase superfamily protein	10.6298	44.4501	2.06287	1.2003e-09
AT1G03410	(2A6)	6.38862	10.4393	0.707765	0.0331766
AT1G03440	Leucine-rich repeat (LRR) family protein	1.84525	14.6994	2.99015	8.63715e-12
AT1G03457	RNA-binding (RRM/RBD/RNP motifs) family protein	4.18524	1.65134	-1.34424	0.000972925
AT1G03470	NETWORKED 3A (NET3A)	5.06321	2.48582	-1.02471	0.0149247
AT1G03475	LESION INITIATION 2 (LIN2)	16.2904	95.64	2.55343	2.87101e-18
AT1G03495	HXXXD-type acyl-transferase family protein	3.61443	6.60803	0.868831	0.0446817
AT1G03520	Core-2/I-branching beta-1%2C6-N-acetylglucosaminyltransferase family protein	3.66269	7.3148	0.997206	0.00386086
AT1G03530	NUCLEAR ASSEMBLY FACTOR 1 (NAF1)	14.7804	3.96909	-1.89915	1.88637e-09
AT1G03540	Pentatricopeptide repeat (PPR-like) superfamily protein	2.22109	1.02794	-1.11248	0.0100111
AT1G03590	Protein phosphatase 2C family protein	21.2394	12.4395	-0.772024	0.00624567
AT1G03600	(PSB27)	1.72206	652.942	8.55718	5.09566e-59
AT1G03610	plant/protein (DUF789)	24.0531	63.1558	1.3924	3.65727e-06
AT1G03620	ELMO/CED-12 family protein	5.29092	0.434816	-3.58977	1.72772e-09
AT1G03630	PROTOCHLOROPHYLLIDE OXIDOREDUCTASE C (POR C)	0.712144	120.382	7.39519	9.48435e-53
AT1G03680	THIOREDOXIN M-TYPE 1 (THM1)	9.23929	375.858	5.3454	4.94887e-53
AT1G03730	pyrroline-5-carboxylate reductase	7.21947	23.9674	1.73112	2.81582e-07
AT1G03740	Protein kinase superfamily protein	11.6225	25.521	1.13518	0.00188872
AT1G03750	SWITCH 2 (SWI2)	4.42874	2.22186	-0.991692	0.00909956
AT1G03760	Prefoldin chaperone subunit family protein	11.5957	2.46307	-2.23048	2.25399e-10
AT1G03770	RING 1B (RING1B)	12.8186	1.16582	-3.45376	7.93945e-18
AT1G03780	TARGETING PROTEIN FOR XKLP2 (TPX2)	4.502	0.740351	-2.60739	6.53959e-10
AT1G03800	ERF DOMAIN PROTEIN 10 (ERF10)	2.42342	1.13286	-1.08911	0.0370502
AT1G03820	E6-like protein	21.0856	8.20257	-1.36173	0.0210336
AT1G03830	guanylate-binding family protein	6.83668	1.03942	-2.71503	3.91696e-19
AT1G03870	FASCICLIN-LIKE ARABINOOGALACTAN 9 (FLA9)	4.96456	136.052	4.77468	5.57727e-38
AT1G03905	ATP-BINDING CASSETTE I19 (ABCI19)	3.6561	1.4123	-1.37492	0.00516526
AT1G03910	CACTIN; CTN	22.3446	13.996	-0.674876	0.0175088
AT1G03930	DUAL SPECIFICITY KINASE 1 (ADK1)	5.629	15.7207	1.4818	7.4728e-07
AT1G03940	HXXXD-type acyl-transferase family protein	2.78554	5.40095	0.953292	0.0377321
AT1G03950	VACUOLAR PROTEIN SORTING-ASSOCIATED PROTEIN 2.3 (VPS2.3)	3.48272	7.03271	1.01509	0.0169469
AT1G03960	Calcium-binding EF hand family protein	3.87983	1.42911	-1.43755	2.45922e-05
AT1G03980	PHYTOCHELATIN SYNTHASE 2 (PCS2)	1.05997	0.0830136	-3.65149	1.08391e-10
AT1G03990	Long-chain fatty alcohol dehydrogenase family protein	0.867155	2.47965	1.51401	0.000207234
AT1G04000	hypothetical protein	7.68108	18.3108	1.2512	0.00366719
AT1G04030	eisosome protein	4.8203	1.4508	-1.73129	4.88784e-05
AT1G04050	HOMOLOG OF SU(VAR)3-9 1 (SUVR1)	3.63068	0.695724	-2.38074	4.51572e-10
AT1G04070	TRANSLOCASE OF OUTER MEMBRANE 22-I (TOM22-I)	19.563	6.64326	-1.55954	1.05595e-05
AT1G04080	(PRP39)	38.0544	24.5149	-0.634444	0.03614
AT1G04100	INDOLEACETIC ACID-INDUCED PROTEIN 10 (IAA10)	6.66488	3.02926	-1.13713	0.0117833
AT1G04120	ATP-BINDING CASSETTE C5 (ABCC5)	32.5629	18.8021	-0.792478	0.017895
AT1G04190	TETRATRICOPEPTIDE REPEAT 3 (TPR3)	20.5937	8.18093	-1.33294	6.93812e-06
AT1G04220	3-KETOACYL-COA SYNTHASE 2 (KCS2)	13.5034	2.50501	-2.43239	0.000260229
AT1G04230	rRNA-processing EFG1-like protein (DUF2361)	8.21593	5.35619	-0.616625	0.0459339
AT1G04240	SHORT HYPOCOTYL 2 (SHY2)	4.65545	38.336	3.03944	5.75053e-09
AT1G04270	CYTOSOLIC RIBOSOMAL PROTEIN S15 (RPS15)	342.652	153.057	-1.16275	0.000366678
AT1G04280	P-loop containing nucleoside triphosphate hydrolases superfamily protein	15.7506	7.98659	-0.978574	0.00220024
AT1G04290	Thioesterase superfamily protein	1.46149	3.02062	1.044	0.0267476
AT1G04310	ETHYLENE RESPONSE SENSOR 2 (ERS2)	6.18712	2.18373	-1.50283	0.000160048
AT1G04350	2-oxoglutarate (2OG) and Fe(II)-dependent oxygenase superfamily protein	1.09172	69.0391	5.9755	1.75056e-42
AT1G04360	ARABIDOPSIS TOXICOS EN LEVADURA 1; ATL1	0.359541	2.38009	2.71814	8.34641e-08
AT1G04410	CYTOSOLIC-NAD-DEPENDENT MALATE DEHYDROGENASE 1 (c-NAD-MDH1)	250.483	403.548	0.688035	0.031898
AT1G04420	NAD(P)-linked oxidoreductase superfamily protein	1.93961	71.6966	5.20692	2.43944e-51
AT1G04425		2.69764	0.156165	-4.10769	8.67073e-12
AT1G04430	S-adenosyl-L-methionine-dependent methyltransferases superfamily protein	33.1328	71.2929	1.10555	0.000317557
AT1G04490	hypothetical protein (DUF3527)	0.278967	2.57775	3.20834	2.25105e-10
AT1G04510	MOS4-ASSOCIATED COMPLEX 3A (MAC3A)	20.3883	11.9662	-0.768967	0.00688601
AT1G04520	PLASMODESMATA-LOCATED PROTEIN 2 (PDLP2)	2.41707	10.3447	2.09616	0.000281558
AT1G04530	TETRATRICOPEPTIDE REPEAT 4 (TPR4)	13.6762	80.1911	2.55111	1.24903e-13
AT1G04540	Calcium-dependent lipid-binding (CaLB domain) family protein	0.861427	2.8746	1.73534	0.00193134
AT1G04550	INDOLE-3-ACETIC ACID INDUCIBLE 12 (IAA12)	13.5475	22.8864	0.755639	0.0316225
AT1G04580	ALDEHYDE OXIDASE 4 (AO4)	19.1952	0.0452834	-8.72181	6.12583e-21
AT1G04590	PPR containing-like protein	8.76703	5.19658	-0.755516	0.0147124
AT1G04600	MYOSIN XI A (XIA)	0.294324	1.12418	1.93409	0.00371409
AT1G04620	7-HYDROXYMETHYL CHLOROPHYLL A (HMCHL) REDUCTASE (HCAR)	0.921826	10.1111	3.45516	4.65722e-24
AT1G04635	EMBRYO DEFECTIVE 1687 (EMB1687)	6.03926	1.13816	-2.40222	1.25896e-06
AT1G04640	LIPOYLTRANSFERASE 2 (LIP2)	2.65293	50.5791	4.25175	8.50415e-40
AT1G04650	holliday junction resolvase	2.42316	0.355603	-2.7623	3.50365e-13
AT1G04680	Pectin lyase-like superfamily protein	3.08767	37.9117	3.61825	1.92085e-13
AT1G04700	PB1 domain-containing protein tyrosine kinase	1.33066	0.315186	-2.07376	4.88334e-07
AT1G04710	PEROXISOMAL 3-KETOACYL-COA THIOLASE 4 (PKT4)	1.7245	8.04042	2.22029	2.10298e-10
AT1G04730	CHROMOSOME TRANSMISSION FIDELITY 18 (CTF18)	2.62147	0.879801	-1.57738	2.42504e-05
AT1G04750	VESICLE-ASSOCIATED MEMBRANE PROTEIN 721 (VAMP721)	43.4585	26.7869	-0.697721	0.0185239
AT1G04800	glycine-rich protein	0.0463172	132.941	11.3953	2.23857e-72
AT1G04810	26S proteasome regulatory complex%2C non-ATPase subcomplex%2C Rpn2/Psmd1 subunit	25.3722	14.1581	-0.841479	0.0049592
AT1G04820	TUBULIN ALPHA-4 CHAIN (TUA4)	208.406	99.0948	-1.07253	0.000514786
AT1G04850	ubiquitin-associated (UBA)/TS-N domain-containing protein	33.7708	22.0044	-0.617852	0.0467308
AT1G04870	PROTEIN ARGININE METHYLTRANSFERASE 10 (PRMT10)	30.6314	8.77763	-1.80412	1.38669e-09
AT1G04900	NADH dehydrogenase ubiquinone complex I%2C assembly factor-like protein (DUF185)	3.91017	1.59057	-1.29786	7.58082e-05
AT1G04930	hydroxyproline-rich glycoprotein family protein	2.44656	0.748292	-1.70384	1.95543e-05
AT1G04940	TRANSLOCON AT THE INNER ENVELOPE MEMBRANE OF CHLOROPLASTS 20-I (Tic20-I)	0.937618	3.6674	1.9637	3.671e-06
AT1G04945	HIT-type Zinc finger family protein	4.53729	1.07052	-2.08349	3.11169e-10
AT1G04985	triacylglycerol lipase-like protein	12.3028	21.6286	0.813779	0.00305112
AT1G05000	PLANT AND FUNGI ATYPICAL DUAL-SPECI&#64257;CITY PHOSPHATASE 1 (PFA-DSP1)	1.79016	4.38562	1.29306	0.00568739
AT1G05010	ETHYLENE-FORMING ENZYME (EFE)	48.5904	234.797	2.27284	5.53442e-07
AT1G05020	ENTH/ANTH/VHS superfamily protein	0.0222843	1.95396	6.36889	2.29083e-17
AT1G05030	Major facilitator superfamily protein	1.81032	5.74442	1.66523	1.56339e-06
AT1G05055	GENERAL TRANSCRIPTION FACTOR II H2 (GTF2H2)	6.40146	3.53717	-0.855932	0.0103411
AT1G05060	coiled-coil protein	27.1407	8.52775	-1.66902	2.99164e-07
AT1G05065	CLAVATA3/ESR-RELATED 20 (CLE20)	10.7829	0.865279	-3.63355	1.13905e-10
AT1G05100	MITOGEN-ACTIVATED PROTEIN KINASE KINASE KINASE 18 (MAPKKK18)	5.31687	2.68784	-0.98877	0.0377316
AT1G05120	Helicase protein with RING/U-box domain-containing protein	9.87356	4.31077	-1.19443	2.119e-05
AT1G05135		4.34011	69.9813	4.00999	1.6668e-19
AT1G05140	Peptidase M50 family protein	4.37839	57.6059	3.71525	1.04489e-23
AT1G05170	Galactosyltransferase family protein	1.11158	6.48593	2.54422	1.1581e-08
AT1G05190	EMBRYO DEFECTIVE 2394 (emb2394)	7.19272	376.108	5.70795	1.20381e-48
AT1G05200	GLUTAMATE RECEPTOR 3.4 (GLR3.4)	1.20607	16.2735	3.75339	1.63351e-29
AT1G05205	hexokinase-1 protein	14.2592	7.63235	-0.9004	0.00501473
AT1G05220	Transmembrane protein 97%2C Putative	1.03832	0.0850266	-3.6328	4.25564e-08
AT1G05230	HOMEODOMAIN GLABROUS 2 (HDG2)	0.639365	3.85677	2.58972	2.14504e-12
AT1G05310	Pectin lyase-like superfamily protein	0.0816021	2.20186	4.76295	6.26754e-09
AT1G05320	myosin heavy chain%2C embryonic smooth protein	10.8979	5.87741	-0.890829	0.00543677
AT1G05340	cysteine-rich TM module stress tolerance protein	6.53724	30.7241	2.23324	0.000972959
AT1G05380	Acyl-CoA N-acyltransferase with RING/FYVE/PHD-type zinc finger protein	17.0765	8.27848	-1.0443	0.000260381
AT1G05385	LOW PSII ACCUMULATION 19 (LPA19)	2.04775	27.4462	3.73834	1.03955e-14
AT1G05400	hypothetical protein	2.90862	0.258945	-3.48619	4.74806e-12
AT1G05410	CDPK adapter%2C putative (DUF1423)	10.7453	5.66897	-0.923214	0.00121693
AT1G05460	SILENCING DEFECTIVE (SDE3)	7.26017	2.99205	-1.27991	1.39081e-05
AT1G05490	CHROMATIN REMODELING 31 (chr31)	3.2487	0.0851063	-5.23826	6.82598e-27
AT1G05520	Sec23/Sec24 protein transport family protein	14.376	7.10766	-1.01559	0.000228881
AT1G05540	hypothetical protein (DUF295)	0.00319122	7.08142	10.3611	3.6029e-19
AT1G05560	UDP-GLUCOSYLTRANSFERASE 75B1 (UGT75B1)	0.0765518	2.79381	5.22152	1.56394e-09
AT1G05575	transmembrane protein	3.35105	87.6989	4.71239	2.26935e-22
AT1G05577	UPSTREAM OF FLC protein (DUF966)	3.11454	0.0409114	-6.19658	4.6903e-19
AT1G05620	URIDINE-RIBOHYDROLASE 2 (URH2)	16.8061	2.38389	-2.81424	1.00135e-15
AT1G05630	INOSITOL-POLYPHOSPHATE 5-PHOSPHATASE 13 (5PTASE13)	1.7647	10.6034	2.58578	1.69928e-15
AT1G05675	UDP-Glycosyltransferase superfamily protein	1.23788	29.8092	4.58735	3.87353e-14
AT1G05680	URIDINE DIPHOSPHATE GLYCOSYLTRANSFERASE 74E2 (UGT74E2)	3.35837	0.906816	-1.88103	0.0131995
AT1G05690	BTB AND TAZ DOMAIN PROTEIN 3 (bt3)	0.367219	5.91002	4.00322	1.19196e-14
AT1G05730	FAM136A-like protein (DUF842)	3.48358	0.305122	-3.47614	3.40054e-10
AT1G05780	Vacuolar ATPase assembly integral membrane protein VMA21-like domain-containing protein	4.25482	2.00979	-1.07571	0.0242712
AT1G05790	lipase class 3 family protein	3.72417	6.04249	0.698537	0.0198222
AT1G05850	POM-POM1 (POM1)	87.7211	374.058	2.09224	2.73151e-08
AT1G05890	ARIADNE 5 (ARI5)	22.0853	13.552	-0.704275	0.0233255
AT1G05900	ENDONUCLEASE III 2 (NTH2)	1.55085	8.48617	2.45029	6.7166e-10
AT1G05910	cell division cycle protein 48-related / CDC48-like protein	12.9075	4.45005	-1.53631	7.63424e-08
AT1G05940	CATIONIC AMINO ACID TRANSPORTER 9 (CAT9)	11.268	17.8875	0.667005	0.01253
AT1G05950	hypothetical protein	4.13111	0.761498	-2.4325	1.01967e-07
AT1G06000	UGT89C1	7.56741	21.697	1.51855	0.00372615
AT1G06040	SALT TOLERANCE (STO)	42.0593	214.619	2.35105	2.65821e-07
AT1G06050	ENHANCED DISEASE RESISTANCE-like protein (DUF1336)	2.808	6.24445	1.15252	0.00174186
AT1G06070	Basic-leucine zipper (bZIP) transcription factor family protein	14.5692	7.45762	-0.965585	0.000220039
AT1G06080	DELTA 9 DESATURASE 1 (ADS1)	64.5636	0.127259	-8.94789	3.2966e-28
AT1G06130	GLYOXALASE 2-4 (GLX2-4)	9.05134	17.6834	0.966417	0.00114351
AT1G06180	MYB DOMAIN PROTEIN 13 (MYB13)	4.33069	0.5001	-3.10823	9.61648e-10
AT1G06190	RHO-N 1 (RHON1)	11.5769	45.0894	1.96136	2.78689e-12
AT1G06220	MATERNAL EFFECT EMBRYO ARREST 5 (MEE5)	26.689	14.4549	-0.884913	0.00400248
AT1G06240	diiron containing four-helix bundle family ferritin protein%2C putative (Protein of unknown function DUF455)	4.45259	15.0072	1.75215	3.50132e-06
AT1G06270	Pentatricopeptide repeat (PPR) superfamily protein	4.99923	1.73491	-1.52895	7.36648e-05
AT1G06350	ADS4; ATADS4; DELTA 9 DESATURASE 4	1.43806	0.0769844	-4.18215	4.78587e-06
AT1G06360	Fatty acid desaturase family protein	0.00667643	4.66339	9.00448	7.1362e-18
AT1G06400	(ARA-2)	29.7261	59.843	1.00935	0.00054742
AT1G06410	TREHALOSE-PHOSPHATASE/SYNTHASE 7 (TPS7)	39.7434	114.599	1.5278	5.12682e-07
AT1G06430	FTSH PROTEASE 8 (ftsh8)	7.9025	179.21	4.50318	1.78071e-26
AT1G06460	ALPHA-CRYSTALLIN DOMAIN 32.1 (ACD32.1)	1.79439	33.979	4.24158	3.7974e-26
AT1G06510	forkhead-associated domain protein	3.72932	15.5211	2.05638	8.33663e-10
AT1G06550	ATP-dependent caseinolytic (Clp) protease/crotonase family protein	63.899	8.51822	-2.90779	3.85191e-10
AT1G06560	NOP2C	5.69346	2.35234	-1.27507	1.54017e-05
AT1G06590	anaphase-promoting complex subunit	3.54722	1.16498	-1.60511	2.3339e-08
AT1G06640	2-oxoglutarate (2OG) and Fe(II)-dependent oxygenase superfamily protein	23.6037	80.6723	1.77272	4.95421e-10
AT1G06645	2-oxoglutarate (2OG) and Fe(II)-dependent oxygenase superfamily protein	0.0459815	14.2799	8.17842	1.78907e-29
AT1G06650	2-oxoglutarate (2OG) and Fe(II)-dependent oxygenase superfamily protein	15.6573	84.4812	2.43136	1.70533e-12
AT1G06660	JASON (JASON)	2.84238	0.273908	-3.37387	1.80028e-14
AT1G06670	NUCLEAR DEIH-BOXHELICASE (NIH)	20.7454	8.75875	-1.24421	3.9798e-05
AT1G06680	PHOTOSYSTEM II SUBUNIT P-1 (PSBP-1)	16.0545	2952.77	7.52258	1.57244e-17
AT1G06690	NAD(P)-linked oxidoreductase superfamily protein	0.733098	36.9356	5.65229	1.26379e-58
AT1G06710	Tetratricopeptide repeat (TPR)-like superfamily protein	3.01187	1.13465	-1.40486	9.99796e-05
AT1G06720	P-loop containing nucleoside triphosphate hydrolases superfamily protein	16.5418	4.26148	-1.95744	1.85786e-09
AT1G06760	H1.1; HISTONE 1.1	161.297	76.076	-1.08399	0.000676708
AT1G06790	RNA polymerase Rpb7 N-terminal domain-containing protein	3.97999	2.12552	-0.906415	0.0121827
AT1G06800	PHOSPHOLIPASE A I GAMMA 1 (PLA-I\{gamma\}1)	17.4641	5.61958	-1.63563	1.4276e-08
AT1G06820	CAROTENOID ISOMERASE (CRTISO)	5.16666	15.7956	1.61172	2.30277e-08
AT1G06830	Glutaredoxin family protein	0.505138	142.802	8.13391	2.26584e-44
AT1G06840	Leucine-rich repeat protein kinase family protein	17.662	5.80435	-1.60527	1.29212e-07
AT1G06890	UDP-XYLOSE TRANSPORTER3; UXT3	27.2635	16.5545	-0.719259	0.0166946
AT1G06900	Insulinase (Peptidase family M16) family protein	19.1193	9.78976	-0.965814	0.00147599
AT1G06950	TRANSLOCON AT THE INNER ENVELOPE MEMBRANE OF CHLOROPLASTS 110 (TIC110)	18.6436	34.0804	0.870219	0.00608882
AT1G06980	6%2C7-dimethyl-8-ribityllumazine synthase	33.5103	0.596632	-5.79528	5.42439e-32
AT1G06990	GDSL-like Lipase/Acylhydrolase superfamily protein	3.99925	0	-11.2945	5.03546e-15
AT1G07000	EXOCYST SUBUNIT EXO70 FAMILY PROTEIN B2 (EXO70B2)	13.632	149.07	3.45112	5.6544e-21
AT1G07010	SHEWENELLA-LIKE PROTEIN PHOSPHATASE 1 (SLP1)	1.46833	56.8155	5.27409	1.13542e-25
AT1G07030	Mitochondrial substrate carrier family protein	12.4099	7.212	-0.782839	0.00540408
AT1G07040	plant/protein	19.1271	10.0948	-0.92074	0.0491729
AT1G07070	Ribosomal protein L35Ae family protein	10.8874	5.68687	-0.939167	0.0145549
AT1G07080	Thioredoxin superfamily protein	19.7986	48.0981	1.28049	1.47657e-06
AT1G07090	LIGHT SENSITIVE HYPOCOTYLS 6 (LSH6)	18.8128	8.24408	-1.18684	0.006734
AT1G07110	"FRUCTOSE-2,6-BISPHOSPHATASE" (F2KP)	5.00496	41.5306	3.05268	2.41043e-19
AT1G07135	glycine-rich protein	18.1323	730.565	5.33204	1.36219e-24
AT1G07150	MITOGEN-ACTIVATED PROTEIN KINASE KINASE KINASE 13 (MAPKKK13)	2.20983	8.71484	1.97663	5.08674e-06
AT1G07160	Protein phosphatase 2C family protein	0.381665	2.94309	2.95199	8.7748e-08
AT1G07180	ALTERNATIVE NAD(P)H DEHYDROGENASE 1 (NDA1)	0.259947	114.049	8.78033	1.31609e-20
AT1G07200	Double Clp-N motif-containing P-loop nucleoside triphosphate hydrolases superfamily protein	8.76419	26.8411	1.61456	1.66305e-06
AT1G07210	Ribosomal protein S18	32.0496	13.0698	-1.29414	4.82943e-07
AT1G07250	UDP-GLUCOSYL TRANSFERASE 71C4 (UGT71C4)	8.32912	26.9551	1.69347	1.34182e-08
AT1G07260	UDP-GLUCOSYL TRANSFERASE 71C3 (UGT71C3)	9.94653	0.891907	-3.47187	1.78841e-10
AT1G07280	Tetratricopeptide repeat (TPR)-like superfamily protein	4.02584	39.7986	3.30407	1.29205e-20
AT1G07290	GOLGI NUCLEOTIDE SUGAR TRANSPORTER 2 (GONST2)	1.36002	0.231052	-2.53412	2.33624e-05
AT1G07300	josephin protein-like protein	5.27279	12.0156	1.18673	0.00245352
AT1G07320	RIBOSOMAL PROTEIN L4 (RPL4)	6.50702	330.99	5.66726	9.7993e-39
AT1G07370	PROLIFERATING CELLULAR NUCLEAR ANTIGEN 1 (PCNA1)	18.4498	3.96294	-2.22243	3.1599e-10
AT1G07380	Neutral/alkaline non-lysosomal ceramidase	14.4415	3.17581	-2.18483	8.85167e-15
AT1G07420	STEROL 4-ALPHA-METHYL-OXIDASE 2-1 (SMO2-1)	14.0575	5.69697	-1.30114	4.91222e-05
AT1G07430	HIGHLY ABA-INDUCED PP2C GENE 2 (HAI2)	5.14282	1.42494	-1.84853	0.000137889
AT1G07440	NAD(P)-binding Rossmann-fold superfamily protein	0	34.2617	14.2335	1.66168e-78
AT1G07500	hypothetical protein	12.1206	28.6187	1.23825	0.0467556
AT1G07520	GRAS family transcription factor	7.36352	18.3279	1.31504	4.55016e-05
AT1G07570	(APK1A)	4.16056	10.2801	1.30357	0.00994899
AT1G07615	OBG A-1	8.47387	3.3523	-1.33765	2.37569e-05
AT1G07620	(ATOBGM)	0.318857	12.6935	5.31883	2.84605e-18
AT1G07640	(OBP2)	0.25198	25.0793	6.61874	1.01133e-14
AT1G07650	Leucine-rich repeat transmembrane protein kinase	2.1949	19.3673	3.14145	7.6221e-30
AT1G07670	ENDOMEMBRANE-TYPE CA-ATPASE 4 (ECA4)	39.9273	22.9203	-0.800675	0.011975
AT1G07700	Thioredoxin superfamily protein	2.129	62.9853	4.88431	2.82977e-43
AT1G07705	NEGATIVE ON TATA LESS2A; NOT2A	7.57089	4.38478	-0.786808	0.00512454
AT1G07720	3-KETOACYL-COA SYNTHASE 3 (KCS3)	3.89829	65.3997	4.06712	1.42259e-31
AT1G07750	RmlC-like cupins superfamily protein	25.6679	14.095	-0.864586	0.0121909
AT1G07790	(HTB1)	47.7199	19.4125	-1.29844	1.50271e-05
AT1G07810	ER-TYPE CA2+-ATPASE 1 (ECA1)	33.5764	12.9701	-1.37196	1.14824e-05
AT1G07820	Histone superfamily protein	91.7575	43.6731	-1.07086	0.000250124
AT1G07830	ribosomal protein L29 family protein	22.679	7.94005	-1.51391	1.59403e-07
AT1G07890	ASCORBATE PEROXIDASE 1 (APX1)	131.592	258.426	0.973649	0.00659456
AT1G07900	LOB DOMAIN-CONTAINING PROTEIN 1 (LBD1)	0.410185	4.28444	3.37617	8.6185e-07
AT1G07950	(MED22B)	11.0086	6.93407	-0.665918	0.0429885
AT1G07960	PDI-LIKE 5-1 (PDIL5-1)	14.9952	8.81052	-0.767428	0.00558172
AT1G07970	cytochrome B561%2C amino-terminal protein	8.55457	4.80462	-0.832125	0.00270077
AT1G07980	"NUCLEAR FACTOR Y, SUBUNIT C10" (NF-YC10)	10.1173	6.39034	-0.662579	0.0429059
AT1G07985	Expressed protein	1.62321	0.130507	-3.52103	1.67186e-06
AT1G08040	trimethylguanosine synthase (DUF707)	9.05008	5.04637	-0.842442	0.00272552
AT1G08110	ATGLYI2; GLYOXALASE12	21.4197	35.2132	0.716947	0.0102415
AT1G08120	TP53-regulating kinase-like protein	1.88996	0.83997	-1.18279	0.0489069
AT1G08125	S-adenosyl-L-methionine-dependent methyltransferases superfamily protein	6.85485	3.87004	-0.824154	0.00750915
AT1G08130	DNA LIGASE 1 (LIG1)	6.58572	3.42952	-0.942715	0.00357355
AT1G08160	Late embryogenesis abundant (LEA) hydroxyproline-rich glycoprotein family	0.736951	15.8996	4.41807	1.27346e-05
AT1G08190	VACUOLAR PROTEIN SORTING 41 (VPS41)	11.4336	23.4909	1.03862	0.00146105
AT1G08200	UDP-D-APIOSE/UDP-D-XYLOSE SYNTHASE 2 (AXS2)	47.0063	103.987	1.14542	0.00141317
AT1G08210	Eukaryotic aspartyl protease family protein	6.67709	3.85841	-0.790635	0.011312
AT1G08220	ATPase complex subunit	4.70665	1.6084	-1.54857	2.39642e-05
AT1G08250	AROGENATE DEHYDRATASE 6 (ADT6)	2.57378	8.97717	1.80064	0.000255599
AT1G08260	TILTED 1 (TIL1)	4.75066	1.01601	-2.22576	4.46577e-16
AT1G08270	vacuolar protein sorting-associated protein	3.23505	0.834737	-1.95461	9.19917e-06
AT1G08280	GALT29A; GLYCOSYLTRANSFERASE 29A	6.6266	2.08898	-1.66593	4.15055e-05
AT1G08290	WIP DOMAIN PROTEIN 3 (WIP3)	5.43301	2.39436	-1.18091	0.00758836
AT1G08315	ARM repeat superfamily protein	30.6814	17.4695	-0.811302	0.0153852
AT1G08340	Rho GTPase activating protein with PAK-box/P21-Rho-binding domain-containing protein	0.475202	1.78575	1.90126	0.00320844
AT1G08350	Endomembrane protein 70 protein family	4.31802	2.20511	-0.966946	0.00727855
AT1G08380	PHOTOSYSTEM I SUBUNIT O (PSAO)	3.07701	2349.47	9.57334	2.92696e-19
AT1G08390	recQ-mediated instability-like protein	1.4747	5.25204	1.82648	9.46662e-05
AT1G08400	RINT-1 / TIP-1 family	3.41831	1.63151	-1.06629	0.00320629
AT1G08410	P-loop containing nucleoside triphosphate hydrolases superfamily protein	14.0575	4.84533	-1.53821	1.51152e-07
AT1G08430	ALUMINUM-ACTIVATED MALATE TRANSPORTER 1 (ALMT1)	4.897	0.0240575	-7.77356	1.67015e-27
AT1G08440	aluminum activated malate transporter family protein	6.87381	0.0044368	-10.0991	3.75565e-16
AT1G08450	CALRETICULIN 3 (CRT3)	23.8649	85.1714	1.83556	5.85386e-05
AT1G08460	HISTONE DEACETYLASE 8 (HDA08)	12.6724	19.7494	0.640353	0.0323254
AT1G08465	YABBY2 (YAB2)	0.105474	3.2305	4.913	1.94499e-18
AT1G08470	STRICTOSIDINE SYNTHASE-LIKE 3 (SSL3)	6.32069	11.8097	0.901079	0.00552455
AT1G08490	CHLOROPLASTIC NIFS-LIKE CYSTEINE DESULFURASE (CPNIFS)	8.7174	31.9567	1.87384	9.9969e-12
AT1G08510	FATTY ACYL-ACP THIOESTERASES B (FATB)	23.8927	57.6945	1.27172	1.27002e-05
AT1G08520	ALBINA 1 (ALB1)	4.41145	78.3875	4.15077	1.93834e-32
AT1G08540	RNAPOLYMERASE SIGMA SUBUNIT 2 (SIG2)	2.22157	42.8786	4.26884	4.24987e-45
AT1G08550	NON-PHOTOCHEMICAL QUENCHING 1 (NPQ1)	2.54582	38.2456	3.90931	1.74624e-32
AT1G08560	SYNTAXIN OF PLANTS 111 (SYP111)	26.3766	7.18272	-1.87831	2.42193e-06
AT1G08570	ATYPICAL CYS HIS RICH THIOREDOXIN 4 (ACHT4)	22.4448	143.78	2.67924	4.13922e-10
AT1G08580	hypothetical protein	22.2263	10.4744	-1.087	0.00137532
AT1G08600	(ATRX)	7.26603	3.42604	-1.0843	5.08412e-05
AT1G08620	(PKDM7D)	10.7518	6.46437	-0.733921	0.00800483
AT1G08630	THREONINE ALDOLASE 1 (THA1)	1.27632	0.153579	-3.03048	0.000429616
AT1G08640	CHLOROPLAST J-LIKE DOMAIN 1 (CJD1)	11.1701	24.0377	1.10564	8.02435e-05
AT1G08660	MALE GAMETOPHYTE DEFECTIVE 2 (MGP2)	13.9169	7.87228	-0.820981	0.00735269
AT1G08720	ENHANCED DISEASE RESISTANCE 1 (EDR1)	9.51402	16.1155	0.760641	0.0105386
AT1G08760	GPI-anchored adhesin-like protein%2C putative (DUF936)	12.7067	6.67098	-0.929719	0.000336536
AT1G08800	MYOB1; MYOSIN BINDING PROTEIN 1	20.1583	7.89984	-1.35166	9.27176e-06
AT1G08810	MYB DOMAIN PROTEIN 60 (MYB60)	0.043692	5.78929	6.9529	7.97924e-20
AT1G08820	VAMP/SYNAPTOBREVIN-ASSOCIATED PROTEIN 27-2 (VAP27-2)	19.6313	11.8725	-0.724988	0.0120816
AT1G08890	Major facilitator superfamily protein	3.49889	1.17587	-1.56698	0.002338
AT1G08900	Major facilitator superfamily protein	0.393935	14.4039	5.1905	1.03559e-31
AT1G08930	EARLY RESPONSE TO DEHYDRATION 6 (ERD6)	21.129	131.285	2.63544	5.75215e-13
AT1G08940	Phosphoglycerate mutase family protein	44.3002	6.1054	-2.8563	1.319e-12
AT1G08960	CATION EXCHANGER 11 (CAX11)	5.89196	3.3887	-0.797802	0.0220242
AT1G08980	AMIDASE 1 (AMI1)	3.52204	46.6646	3.72641	1.64842e-22
AT1G08990	PLANT GLYCOGENIN-LIKE STARCH INITIATION PROTEIN 5 (PGSIP5)	1.09201	0	-9.74106	1.98961e-17
AT1G09000	NPK1-RELATED PROTEIN KINASE 1 (NP1)	2.03819	0.510053	-1.99924	5.685e-07
AT1G09010	glycoside hydrolase family 2 protein	12.4632	21.0484	0.75595	0.00842549
AT1G09060	JMJ24	10.931	39.5493	1.85508	5.97021e-10
AT1G09070	SOYBEAN GENE REGULATED BY COLD-2 (SRC2)	121.469	1938.09	3.996	4.84442e-26
AT1G09080	BINDING PROTEIN 3 (BIP3)	2.2906	14.8671	2.69831	0.00305779
AT1G09090	RESPIRATORY BURST OXIDASE HOMOLOG B (RBOHB)	1.33277	0.00582459	-7.59507	7.55999e-22
AT1G09100	26S PROTEASOME AAA-ATPASE SUBUNIT RPT5B (RPT5B)	20.8967	7.46571	-1.48372	2.87402e-07
AT1G09130	ATP-dependent caseinolytic (Clp) protease/crotonase family protein	16.856	86.8437	2.36521	3.23944e-15
AT1G09160	Protein phosphatase 2C family protein	9.65718	15.0881	0.643043	0.0221114
AT1G09180	SECRETION-ASSOCIATED RAS SUPER FAMILY 1 (SARA1A)	1.5156	4.77806	1.65797	0.0476544
AT1G09200	Histone superfamily protein	110.604	55.7506	-0.98784	0.000433963
AT1G09220	Pentatricopeptide repeat (PPR) superfamily protein	1.86404	0.804101	-1.21052	0.00747725
AT1G09240	NICOTIANAMINE SYNTHASE 3 (NAS3)	0.20954	17.4932	6.35092	6.11043e-08
AT1G09250	basic helix-loop-helix (bHLH) DNA-binding superfamily protein	22.9167	43.6295	0.928109	0.00254002
AT1G09280	rhodanese-like domain protein	12.8876	6.24749	-1.04407	0.000138124
AT1G09290	hypothetical protein	6.19835	3.40964	-0.862698	0.00933466
AT1G09300	ATICP55	2.73062	1.40441	-0.957014	0.006618
AT1G09310	plant/protein (Protein of unknown function%2C DUF538)	9.54644	778.458	6.34845	8.22643e-40
AT1G09320	agenet domain-containing protein	5.35762	2.77284	-0.949346	0.00515056
AT1G09340	CHLOROPLAST RNA BINDING (CRB)	1.02579	538.276	9.03243	1.88335e-79
AT1G09380	UMAMIT25; USUALLY MULTIPLE ACIDS MOVE IN AND OUT TRANSPORTERS 25	8.04986	0	-13.2539	1.13524e-19
AT1G09415	NIM1-INTERACTING 3 (NIMIN-3)	7.32699	29.1305	1.98976	4.1632e-09
AT1G09420	GLUCOSE-6-PHOSPHATE DEHYDROGENASE 4 (G6PD4)	2.3216	0.91045	-1.34216	0.00241862
AT1G09440	Protein kinase superfamily protein	0.168873	4.29857	4.66367	2.49724e-08
AT1G09450	HASPIN-RELATED GENE (Haspin)	2.2403	0.222481	-3.34438	6.09401e-13
AT1G09460	Carbohydrate-binding X8 domain superfamily protein	35.698	1.42259	-4.64819	4.79374e-12
AT1G09470	ATNEAP3	1.99326	0.31986	-2.64197	1.07361e-05
AT1G09480	NAD(P)-binding Rossmann-fold superfamily protein	5.53354	0.709495	-2.95541	3.01253e-10
AT1G09486		6.35295	2.07239	-1.61796	6.48299e-05
AT1G09530	PHYTOCHROME INTERACTING FACTOR 3 (PIF3)	2.18666	4.17648	0.933334	0.0250392
AT1G09540	MYB DOMAIN PROTEIN 61 (MYB61)	1.68119	0.0797213	-4.35825	5.52857e-08
AT1G09560	GERMIN-LIKE PROTEIN 5 (GLP5)	88.8037	174.206	0.972244	0.0229496
AT1G09575	calcium uniporter-like protein (DUF607)	5.83843	18.9182	1.69692	4.87428e-07
AT1G09590	Translation protein SH3-like family protein	171.379	78.9434	-1.11848	0.000665894
AT1G09630	RAB GTPASE 11C (RAB11c)	23.4496	8.53455	-1.45706	4.16774e-07
AT1G09640	Translation elongation factor EF1B%2C gamma chain	159.064	90.8776	-0.807672	0.0114886
AT1G09645	transmembrane protein	10.3546	15.9742	0.626131	0.0436878
AT1G09680	Pentatricopeptide repeat (PPR) superfamily protein	3.58249	1.31327	-1.43872	0.00223771
AT1G09690	Translation protein SH3-like family protein	244.162	136.173	-0.842471	0.0087067
AT1G09700	HYPONASTIC LEAVES 1 (HYL1)	9.38221	5.0066	-0.906729	0.00179672
AT1G09710	Homeodomain-like superfamily protein	0.929501	2.44359	1.39327	0.000583305
AT1G09740	Adenine nucleotide alpha hydrolases-like superfamily protein	16.3597	6.71874	-1.2825	0.000704429
AT1G09750	Eukaryotic aspartyl protease family protein	0.364613	42.9187	6.891	1.19139e-56
AT1G09760	U2 SMALL NUCLEAR RIBONUCLEOPROTEIN A (U2A')	18.6146	11.2608	-0.725479	0.00630245
AT1G09770	CELL DIVISION CYCLE 5 (CDC5)	91.525	39.8406	-1.19983	0.000130192
AT1G09795	ATP PHOSPHORIBOSYL TRANSFERASE 2 (ATP-PRT2)	4.36993	28.761	2.71802	1.26197e-22
AT1G09800	Pseudouridine synthase family protein	1.78449	0.485776	-1.87751	5.0836e-06
AT1G09810	EVOLUTIONARILY CONSERVED C-TERMINAL REGION 11 (ECT11)	5.54407	3.31895	-0.741302	0.0196744
AT1G09812	multidrug resistance protein	3.46195	0.612653	-2.52119	1.19156e-05
AT1G09815	POLYMERASE DELTA 4 (POLD4)	49.9667	13.9958	-1.83395	2.6548e-10
AT1G09840	SHAGGY-LIKE PROTEIN KINASE 41 (SK41)	29.1681	9.87323	-1.56288	7.01676e-08
AT1G09890	Rhamnogalacturonate lyase family protein	0.0152114	1.0069	5.90453	4.28995e-11
AT1G09930	OLIGOPEPTIDE TRANSPORTER 2 (OPT2)	0.0706916	9.33047	7.04009	3.81547e-28
AT1G09932	Phosphoglycerate mutase family protein	2.48632	60.8174	4.61367	7.71798e-19
AT1G09940	(HEMA2)	14.7928	116.18	2.97347	6.32018e-19
AT1G09950	RESPONSE TO ABA AND SALT 1 (RAS1)	2.74612	44.0489	4.00056	5.23035e-27
AT1G09960	SUCROSE TRANSPORTER 4 (SUT4)	5.61691	3.08321	-0.866684	0.026207
AT1G09980	Putative serine esterase family protein	11.8175	7.20812	-0.713081	0.00771543
AT1G10020	formin-like protein (DUF1005)	17.0415	31.9558	0.906552	0.00227
AT1G10060	BRANCHED-CHAIN AMINO ACID TRANSAMINASE 1 (BCAT-1)	0.00915289	1.89543	7.50603	1.21369e-23
AT1G10090	Early-responsive to dehydration stress protein (ERD4)	1.97391	10.2427	2.37482	1.28059e-16
AT1G10120	CIB4; CRY2-INTERACTING BHLH 4	3.55336	7.01912	0.980348	0.0410632
AT1G10130	ENDOPLASMIC RETICULUM-TYPE CALCIUM-TRANSPORTING ATPASE 3 (ECA3)	5.62848	3.45496	-0.7036	0.0098304
AT1G10140	Uncharacterized conserved protein UCP031279	127.137	15.5085	-3.03292	4.61284e-09
AT1G10150	Carbohydrate-binding protein	12.9895	30.3971	1.22633	0.000640215
AT1G10155	PHLOEM PROTEIN 2-A10 (PP2-A10)	0.134572	11.4946	6.35523	1.98629e-12
AT1G10180	LOW protein: exocyst complex component-like protein	12.6918	5.10828	-1.31291	1.42567e-06
AT1G10200	WLIM1 (WLIM1)	35.2216	20.6102	-0.772279	0.0182892
AT1G10230	SKP1-LIKE 18 (SK18)	21.0549	9.65803	-1.12641	0.00694739
AT1G10250	paired amphipathic helix Sin3-like protein	1.95141	0.721868	-1.44103	0.0127297
AT1G10270	GLUTAMINE-RICH PROTEIN 23 (GRP23)	14.4469	3.11179	-2.21555	1.9627e-15
AT1G10300	Nucleolar GTP-binding protein	2.9948	0.0374495	-6.35374	2.28841e-15
AT1G10310	NAD(P)-binding Rossmann-fold superfamily protein	3.92507	7.90885	1.01072	0.00178035
AT1G10320	Zinc finger C-x8-C-x5-C-x3-H type family protein	7.29341	4.42881	-0.71919	0.0090195
AT1G10340	Ankyrin repeat family protein	0.277377	83.9194	8.22385	6.97584e-40
AT1G10350	DNAJ heat shock family protein	8.95773	14.2466	0.670169	0.036497
AT1G10360	GLUTATHIONE S-TRANSFERASE TAU 18 (GSTU18)	0.0672844	83.6174	10.2937	6.32835e-92
AT1G10370	EARLY-RESPONSIVE TO DEHYDRATION 9 (ERD9)	1.45873	144.75	6.63423	3.78301e-13
AT1G10380	Putative membrane lipoprotein	0.0265348	13.8228	8.8706	8.20904e-25
AT1G10400	UDP-Glycosyltransferase superfamily protein	8.79806	0.320896	-4.76737	1.19587e-07
AT1G10410	CW14 protein (DUF1336)	28.2654	9.6445	-1.55048	4.64095e-08
AT1G10450	SIN3-LIKE 6 (SNL6)	11.1294	4.38489	-1.34356	3.29854e-07
AT1G10460	GERMIN-LIKE PROTEIN 7 (GLP7)	12.8659	2.09914	-2.6141	9.09664e-11
AT1G10470	RESPONSE REGULATOR 4 (ARR4)	68.4441	117.675	0.781757	0.0169878
AT1G10480	ZINC FINGER PROTEIN 5 (ZFP5)	16.0573	0	-13.0977	2.39141e-52
AT1G10500	CHLOROPLAST-LOCALIZED ISCA-LIKE PROTEIN (CPISCA)	17.029	48.9504	1.52346	1.85144e-08
AT1G10510	EMBRYO DEFECTIVE 2004 (emb2004)	4.59964	12.0752	1.39212	4.17702e-07
AT1G10522	PLASTID REDOX INSENSITIVE 2 (PRIN2)	4.76173	7.97919	0.745365	0.0423783
AT1G10530	D-ribose-binding periplasmic protein	7.33931	0.119409	-5.92937	4.54268e-28
AT1G10540	NUCLEOBASE-ASCORBATE TRANSPORTER 8 (NAT8)	7.88201	0.0405122	-7.51397	7.67581e-42
AT1G10550	XYLOGLUCAN:XYLOGLUCOSYL TRANSFERASE 33 (XTH33)	0.293291	3.21249	3.44913	3.3672e-08
AT1G10560	PLANT U-BOX 18 (PUB18)	0.588548	7.97133	3.75387	9.0211e-16
AT1G10570	OVERLY TOLERANT TO SALT 2 (OTS2)	12.3069	5.56786	-1.14338	3.27051e-05
AT1G10580	Transducin/WD40 repeat-like superfamily protein	25.2438	11.2509	-1.16566	4.97928e-06
AT1G10585	basic helix-loop-helix (bHLH) DNA-binding superfamily protein	20.3172	0.822025	-4.6305	3.02624e-11
AT1G10600	ASSOCIATED MOLECULE WITH THE SH3 DOMAIN OF STAM 2 (AMSH2)	3.64363	11.0073	1.59486	4.71279e-06
AT1G10610	basic helix-loop-helix (bHLH) DNA-binding superfamily protein	1.42099	4.70523	1.72572	1.26572e-05
AT1G10650	SBP (S-ribonuclease binding protein) family protein	6.33472	26.1982	2.04828	8.45046e-09
AT1G10657	transmembrane protein	0.0434664	6.75601	7.20776	2.84539e-25
AT1G10660	transmembrane protein	5.25848	19.9892	1.92639	4.58337e-11
AT1G10682	SHORT OPEN READING FRAME 1; SORF1	5.96134	40.6767	2.77371	1.70791e-08
AT1G10700	PHOSPHORIBOSYL PYROPHOSPHATE (PRPP) SYNTHASE 3 (PRS3)	9.15937	15.2692	0.738123	0.0183988
AT1G10730	ADAPTOR PROTEIN-1 MU-ADAPTIN 1; AP1M1	5.40762	3.32084	-0.70183	0.0454513
AT1G10740	alpha/beta-Hydrolases superfamily protein	8.07856	44.019	2.4454	1.64151e-10
AT1G10750	carboxyl-terminal peptidase%2C putative (DUF239)	1.87255	0.332436	-2.492	0.000683055
AT1G10760	STARCH EXCESS 1 (SEX1)	11.9481	22.1991	0.893774	0.027098
AT1G10780	F-box/RNI-like superfamily protein	2.48413	0.486893	-2.35589	2.46757e-07
AT1G10830	15-CIS-ZETA-CAROTENE ISOMERASE (Z-ISO)	4.3518	25.4246	2.54686	2.30001e-17
AT1G10870	ARF-GAP DOMAIN 4 (AGD4)	4.01996	2.07665	-0.953675	0.00119849
AT1G10900	Phosphatidylinositol-4-phosphate 5-kinase family protein	3.90825	16.4121	2.0698	2.43491e-13
AT1G10910	EMBRYO DEFECTIVE 3103 (EMB3103)	4.76125	10.8131	1.18276	3.10201e-05
AT1G10920	(LOV1)	1.22974	6.35924	2.36749	1.02804e-05
AT1G10930	(RECQ4A)	2.32036	1.19997	-0.951868	0.00600794
AT1G10960	FERREDOXIN 1 (FD1)	21.8287	882.128	5.3364	3.34002e-18
AT1G10970	ZINC TRANSPORTER 4 PRECURSOR (ZIP4)	4.60185	2.27431	-1.01878	0.00914249
AT1G10990	transmembrane protein	61.4396	0.937286	-6.00217	1.18437e-38
AT1G11000	MILDEW RESISTANCE LOCUS O 4 (MLO4)	5.30033	1.67032	-1.66501	8.07444e-05
AT1G11050	Protein kinase superfamily protein	11.1879	47.1277	2.07433	3.77261e-11
AT1G11100	FRG5; SNF2-RING-HELICASE?LIKE 5	6.26452	0.282214	-4.47534	2.25058e-23
AT1G11120	CTTNBP 2 amino-terminal-like protein	1.38526	0.349466	-1.98077	4.98162e-05
AT1G11125	hypothetical protein	3.41059	0.357118	-3.24279	2.15282e-08
AT1G11130	STRUBBELIG (SUB)	11.3749	3.50179	-1.70119	2.17889e-06
AT1G11170	lysine ketoglutarate reductase trans-splicing-like protein (DUF707)	1.06348	0.362958	-1.53931	0.00277623
AT1G11175		6.65571	13.3832	1.00711	0.0403
AT1G11180	SECRETORY CARRIER MEMBRANE PROTEIN 2 (SCAMP2)	0.627717	3.636	2.53169	2.78441e-07
AT1G11185		40.5047	5.29541	-2.94177	3.42615e-13
AT1G11190	BIFUNCTIONAL NUCLEASE I (BFN1)	5.72447	1.08967	-2.39349	1.04298e-05
AT1G11210	cotton fiber protein%2C putative (DUF761)	6.13357	21.9434	1.83972	0.0144863
AT1G11220	cotton fiber%2C putative (DUF761)	1.61548	0.630122	-1.36169	0.0308762
AT1G11240	ribosomal RNA-processing protein	24.7959	11.8318	-1.06768	6.83253e-05
AT1G11260	SUGAR TRANSPORTER 1 (STP1)	16.8765	181.653	3.42805	3.49237e-08
AT1G11290	CHLORORESPIRATORY REDUCTION22 (CRR22)	1.41841	4.49616	1.66253	2.85238e-05
AT1G11300	G-type lectin S-receptor-like Serine/Threonine-kinase	0.314762	1.92332	2.60869	4.13225e-10
AT1G11310	MILDEW RESISTANCE LOCUS O 2 (MLO2)	19.0504	70.6728	1.89144	4.57454e-09
AT1G11320	GDSL esterase/lipase	1.9743	0.9959	-0.982873	0.0363338
AT1G11340	G-type lectin S-receptor-like Serine/Threonine-kinase	0.0221705	1.23439	5.70603	1.93465e-19
AT1G11350	S-DOMAIN-1 13 (SD1-13)	2.39081	16.6521	2.79996	2.69341e-13
AT1G11360	Adenine nucleotide alpha hydrolases-like superfamily protein	23.6126	13.9805	-0.754999	0.0152954
AT1G11380	PLAC8 family protein	3.87223	8.46577	1.12629	0.0190157
AT1G11400	PARTNER OF Y14-MAGO (PYM)	14.8863	7.60159	-0.969761	0.000277155
AT1G11410	S-locus lectin protein kinase family protein	1.34504	10.1435	2.91461	1.04803e-06
AT1G11420	DOMAIN OF UNKNOWN FUNCTION 724 2 (DUF2)	10.8473	0.457065	-4.56381	6.81762e-38
AT1G11430	MULTIPLE ORGANELLAR RNA EDITING FACTOR 9 (MORF9)	7.09529	42.5878	2.58508	4.00087e-20
AT1G11440	hypothetical protein	0.698269	12.1148	4.10405	1.30264e-11
AT1G11475	(NRPB10)	15.4028	7.86382	-0.970127	0.000527665
AT1G11480	eukaryotic translation initiation factor-like protein	43.3613	23.882	-0.860149	0.00516656
AT1G11530	C-TERMINAL CYSTEINE RESIDUE IS CHANGED TO A SERINE 1 (CXXS1)	0.207145	24.624	6.87132	2.32696e-17
AT1G11580	METHYLESTERASE PCR A (PMEPCRA)	1035.34	38.2583	-4.75836	2.4641e-29
AT1G11600	"CYTOCHROME P450, FAMILY 77, SUBFAMILY B, POLYPEPTIDE 1" (CYP77B1)	10.889	0	-12.7429	5.99848e-18
AT1G11650	(RBP45B)	51.7762	90.1563	0.800108	0.00895954
AT1G11670	MATE efflux family protein	28.5549	17.3188	-0.721447	0.0176134
AT1G11680	CYTOCHROME P450 51G1 (CYP51G1)	103.423	41.8233	-1.30628	2.20854e-05
AT1G11700	senescence regulator (Protein of unknown function%2C DUF584)	1.23268	8.21326	2.73207	0.000229282
AT1G11710	Pentatricopeptide repeat (PPR) superfamily protein	2.3472	1.03204	-1.18965	0.00586527
AT1G11720	STARCH SYNTHASE 3 (SS3)	9.48135	18.8244	0.989273	0.00109198
AT1G11750	CLP PROTEASE PROTEOLYTIC SUBUNIT 6 (CLPP6)	8.2402	55.1692	2.74293	1.44248e-23
AT1G11760	(MED32)	8.8264	4.44797	-0.987081	0.00489872
AT1G11790	AROGENATE DEHYDRATASE 1 (ADT1)	4.85417	9.69119	0.997467	0.00554303
AT1G11820	O-Glycosyl hydrolases family 17 protein	8.50807	15.2054	0.8368	0.0177324
AT1G11850	transmembrane protein	0	24.6382	12.5286	1.47353e-28
AT1G11860	Glycine cleavage T-protein family	24.1871	908.762	5.23154	8.90013e-45
AT1G11870	SERYL-TRNA SYNTHETASE (SRS)	3.35918	16.1528	2.26464	7.79431e-14
AT1G11890	SECRETION 22 (SEC22)	13.6309	26.267	0.946191	0.000749357
AT1G11930	Putative pyridoxal phosphate-dependent enzyme%2C YBL036C type	16.5562	33.0707	0.998364	0.000150824
AT1G11940	Core-2/I-branching beta-1%2C6-N-acetylglucosaminyltransferase family protein	4.63873	1.82893	-1.33926	0.000351034
AT1G11960	ERD (early-responsive to dehydration stress) family protein	2.9185	73.4896	4.65472	4.49638e-43
AT1G12000	Phosphofructokinase family protein	68.4102	10.1386	-2.7544	2.85517e-16
AT1G12010	2-oxoglutarate (2OG) and Fe(II)-dependent oxygenase superfamily protein	0.226685	2.48648	3.44786	1.97668e-05
AT1G12020	hypothetical protein	35.8364	12.1833	-1.55808	1.01181e-06
AT1G12030	phosphoenolpyruvate carboxylase%2C putative (DUF506)	7.62816	2.1091	-1.85529	2.93946e-05
AT1G12040	LEUCINE-RICH REPEAT/EXTENSIN 1 (LRX1)	1.75336	0	-10.5739	8.95606e-13
AT1G12060	BCL-2-ASSOCIATED ATHANOGENE 5 (BAG5)	3.23455	8.28498	1.35524	0.00882892
AT1G12080	Vacuolar calcium-binding protein-like protein	1.64798	12.5298	2.92222	0.0183421
AT1G12090	EXTENSIN-LIKE PROTEIN (ELP)	0.0664495	204.921	11.4923	2.38363e-66
AT1G12110	NITRATE TRANSPORTER 1.1 (NRT1.1)	24.0952	43.4769	0.851344	0.0413428
AT1G12120	hypothetical protein (DUF863)	25.5355	16.013	-0.672711	0.0247566
AT1G12130	FMOGS-OX6	1.24489	0.0380061	-5.02286	5.08346e-13
AT1G12140	FLAVIN-MONOOXYGENASE GLUCOSINOLATE S-OXYGENASE 5 (FMO GS-OX5)	15.4304	27.8088	0.849995	0.0206244
AT1G12160	Flavin-binding monooxygenase family protein	10.2966	0.682574	-3.91731	5.34609e-27
AT1G12200	FLAVIN MONOOXYGENASE (FMO)	96.7156	7.10983	-3.76583	7.3296e-28
AT1G12220	RESISTANT TO P. SYRINGAE 5 (RPS5)	2.97832	11.364	1.93151	2.75969e-11
AT1G12230	Aldolase superfamily protein	11.3159	18.7539	0.728341	0.013225
AT1G12240	(ATBETAFRUCT4)	2.86621	74.5209	4.70104	5.80155e-14
AT1G12244	Polynucleotidyl transferase%2C ribonuclease H-like superfamily protein	1.75369	7.88366	2.16467	9.43466e-07
AT1G12250	TL20.3	0.701372	34.674	5.62438	8.68898e-51
AT1G12270	HOP1 (Hop1)	25.8224	15.6427	-0.723064	0.00645181
AT1G12280	SUPPRESSOR OF MKK1 MKK2 2 (SUMM2)	2.52345	12.9245	2.35467	3.41824e-10
AT1G12300	Tetratricopeptide repeat (TPR)-like superfamily protein	2.13798	0.920477	-1.21513	0.00273124
AT1G12330	cyclin-dependent kinase-like protein	0.78203	5.21901	2.73823	1.60712e-08
AT1G12360	KEULE (KEU)	13.0958	21.9686	0.746533	0.0177324
AT1G12370	PHOTOLYASE 1 (PHR1)	1.5151	5.54378	1.8692	0.00710473
AT1G12380	hypothetical protein	9.39419	3.68838	-1.35011	0.000706442
AT1G12410	CLP PROTEASE PROTEOLYTIC SUBUNIT 2 (CLP2)	18.3288	79.9894	2.12559	4.81547e-14
AT1G12440	A20/AN1-like zinc finger family protein	48.9521	77.3056	0.659298	0.0258961
AT1G12450	SNARE associated Golgi protein family	3.44435	8.0563	1.22492	0.00103688
AT1G12480	OZONE-SENSITIVE 1 (OZS1)	0.0913764	1.61547	4.15295	2.85808e-11
AT1G12500	Nucleotide-sugar transporter family protein	6.80692	30.717	2.17315	6.22154e-10
AT1G12550	HYDROXYPYRUVATE REDUCTASE 3 (HPR3)	0.721994	8.1697	3.4958	1.10583e-11
AT1G12560	EXPANSIN A7 (EXPA7)	1.36876	0	-9.3953	1.17245e-08
AT1G12580	PHOSPHOENOLPYRUVATE CARBOXYLASE-RELATED KINASE 1 (PEPKR1)	18.1536	62.1668	1.77568	2.03118e-09
AT1G12600	UDP-N-acetylglucosamine (UAA) transporter family	1.21987	0.342172	-1.83204	0.000355316
AT1G12610	DWARF AND DELAYED FLOWERING 1 (DDF1)	0.0312384	203.856	12.5808	2.15644e-121
AT1G12650	rRNA biogenesis RRP36-like protein	15.8487	10.2149	-0.634909	0.0481689
AT1G12710	PHLOEM PROTEIN 2-A12 (PP2-A12)	1.79178	5.3997	1.58952	8.90253e-05
AT1G12740	"CYTOCHROME P450, FAMILY 87, SUBFAMILY A, POLYPEPTIDE 2" (CYP87A2)	14.3866	0.0148227	-9.89886	6.00991e-55
AT1G12750	RHOMBOID-LIKE PROTEIN 6 (RBL6)	3.4754	9.53943	1.45601	0.000228146
AT1G12760	Zinc finger%2C C3HC4 type (RING finger) family protein	20.4092	49.6065	1.28112	1.41514e-06
AT1G12770	EMBRYO DEFECTIVE 1586 (EMB1586)	9.22232	28.031	1.60377	1.60854e-09
AT1G12790	DNA ligase-like protein	3.88409	2.02184	-0.93898	0.0204854
AT1G12800	S1 DOMAIN-CONTAINING RBP; SDP	6.24954	77.97	3.64073	7.8363e-27
AT1G12805	nucleotide binding protein	264.286	0.351	-9.55922	2.77621e-74
AT1G12810	proline-rich family protein	70.24	16.769	-2.06637	2.05413e-09
AT1G12830	nucleolin	31.1547	13.7837	-1.17745	4.69392e-05
AT1G12840	DE-ETIOLATED 3 (DET3)	31.1007	53.9374	0.794374	0.00791944
AT1G12860	SCREAM 2 (SCRM2)	0.928516	9.56868	3.35795	3.6531e-11
AT1G12890	Integrase-type DNA-binding superfamily protein	36.7246	5.52693	-2.73197	1.4859e-08
AT1G12900	GLYCERALDEHYDE 3-PHOSPHATE DEHYDROGENASE A SUBUNIT 2 (GAPA-2)	1.41182	1839.74	10.3477	5.03106e-61
AT1G12940	NITRATE TRANSPORTER2.5 (NRT2.5)	5.92231	0.167508	-5.12988	5.59194e-14
AT1G12950	ROOT HAIR SPECIFIC 2 (RSH2)	13.966	0.0574167	-7.96627	1.28243e-60
AT1G12980	ENHANCER OF SHOOT REGENERATION 1 (ESR1)	9.34616	0	-12.0169	1.96863e-24
AT1G12990	beta-1%2C4-N-acetylglucosaminyltransferase family protein	4.58163	28.0158	2.61193	2.21681e-16
AT1G13030	sphere organelles protein-like protein	6.54362	1.94379	-1.75177	1.19491e-08
AT1G13040	Pentatricopeptide repeat (PPR-like) superfamily protein	4.84432	1.29517	-1.89814	3.09093e-06
AT1G13050	proline-rich receptor-like kinase	4.01395	1.80307	-1.15327	0.00374448
AT1G13080	"CYTOCHROME P450, FAMILY 71, SUBFAMILY B, POLYPEPTIDE 2" (CYP71B2)	8.65843	32.525	1.90956	0.000699286
AT1G13090	"CYTOCHROME P450, FAMILY 71, SUBFAMILY B, POLYPEPTIDE 28" (CYP71B28)	9.62092	41.6514	2.11382	1.85037e-08
AT1G13100	"CYTOCHROME P450, FAMILY 71, SUBFAMILY B, POLYPEPTIDE 29" (CYP71B29)	0.0669518	6.64256	6.55334	3.14087e-22
AT1G13110	"CYTOCHROME P450, FAMILY 71 SUBFAMILY B, POLYPEPTIDE 7" (CYP71B7)	1.36126	49.2133	5.18076	1.05204e-19
AT1G13120	nucleoporin GLE1-like protein	7.32158	4.62759	-0.661605	0.0217538
AT1G13140	"CYTOCHROME P450, FAMILY 86, SUBFAMILY C, POLYPEPTIDE 3" (CYP86C3)	1.26508	0.315004	-1.99004	0.00027915
AT1G13160	ARM repeat superfamily protein	15.7245	7.02412	-1.16352	0.000521553
AT1G13170	OSBP(OXYSTEROL BINDING PROTEIN)-RELATED PROTEIN 1D (ORP1D)	11.0011	5.66971	-0.956309	0.000789298
AT1G13180	DISTORTED TRICHOMES 1 (DIS1)	6.9243	2.65983	-1.37695	0.000294984
AT1G13210	AUTOINHIBITED CA2+/ATPASE II (ACA.l)	12.43	61.9213	2.31669	3.78494e-10
AT1G13220	LITTLE NUCLEI2 (LINC2)	15.8694	5.56905	-1.51054	5.41895e-09
AT1G13245	ROTUNDIFOLIA LIKE 17 (RTFL17)	11.0601	48.7119	2.13848	3.17336e-05
AT1G13260	RELATED TO ABI3/VP1 1 (RAV1)	17.1612	98.6748	2.52311	1.61009e-10
AT1G13270	METHIONINE AMINOPEPTIDASE 1B (MAP1C)	5.03056	18.331	1.86571	1.89021e-10
AT1G13280	ALLENE OXIDE CYCLASE 4 (AOC4)	69.9199	12.913	-2.43673	1.32635e-11
AT1G13300	HYPERSENSITIVITY TO LOW PI-ELICITED PRIMARY ROOT SHORTENING 1 (HRS1)	2.40692	0	-10.6044	6.7147e-19
AT1G13330	ARABIDOPSIS HOP2 HOMOLOG (AHP2)	2.64663	0.225588	-3.51841	1.0816e-10
AT1G13340	Regulator of Vps4 activity in the MVB pathway protein	16.7014	77.7099	2.21824	0.000563335
AT1G13350	Protein kinase superfamily protein	6.24154	11.4642	0.87703	0.00122534
AT1G13380	sodium/hydrogen exchanger (DUF1218)	31.124	19.8771	-0.647324	0.0250744
AT1G13470	hypothetical protein (DUF1262)	0.116926	36.9112	8.2637	2.05535e-14
AT1G13480	hypothetical protein (DUF1262)	5.43659	0.227348	-4.57801	1.33532e-13
AT1G13520	hypothetical protein (DUF1262)	11.3969	2.8927	-1.97491	0.0214219
AT1G13560	AMINOALCOHOLPHOSPHOTRANSFERASE 1 (AAPT1)	7.67837	26.9172	1.80912	2.17413e-10
AT1G13570	F-box/RNI-like superfamily protein	15.0187	7.83605	-0.937138	0.00290527
AT1G13590	PHYTOSULFOKINE 1 PRECURSOR (PSK1)	5.0793	0	-10.4802	1.18389e-12
AT1G13609	Defensin-like (DEFL) family protein	0.137779	65.7627	8.90913	1.2224e-37
AT1G13620	ROOT MERISTEM GROWTH FACTOR 2 (RGF2)	4.08155	0	-10.5435	2.15071e-17
AT1G13630	Tetratricopeptide repeat (TPR)-like superfamily protein	1.3137	0.64974	-1.01086	0.0170028
AT1G13650	hypothetical protein	0.00384161	24.1384	12.313	8.33586e-45
AT1G13700	6-PHOSPHOGLUCONOLACTONASE 1 (PGL1)	4.23269	9.23787	1.126	0.0245001
AT1G13750	Purple acid phosphatases superfamily protein	2.54402	6.14357	1.27138	0.0075542
AT1G13800	EMBRYONIC FACTOR 19 (FAC19)	1.52055	0.325127	-2.2186	1.33895e-06
AT1G13810	Restriction endonuclease%2C type II-like superfamily protein	8.65597	4.8812	-0.829508	0.0352142
AT1G13820	alpha/beta-Hydrolases superfamily protein	1.75263	27.2535	3.95601	1.09132e-33
AT1G13910	Leucine-rich repeat (LRR) family protein	3.06403	1.09653	-1.48194	0.000172493
AT1G13920	Remorin family protein	0.211461	2.60515	3.60111	9.09664e-11
AT1G13930	oleosin-B3-like protein	20.0693	108.876	2.4394	1.35039e-09
AT1G13950	EUKARYOTIC ELONGATION FACTOR 5A-1 (ELF5A-1)	4.03782	10.0326	1.311	0.00857076
AT1G13960	WRKY DNA-BINDING PROTEIN 4 (WRKY4)	20.1399	12.7324	-0.660865	0.0200811
AT1G13970	beta-hexosaminidase (DUF1336)	3.9608	0.596955	-2.72298	1.02645e-11
AT1G13980	GNOM (GN)	20.2558	10.9481	-0.887356	0.00401054
AT1G14030	LYSINE METHYLTRANSFERASE (LSMT)-LIKE (LSMT-L)	1.54801	17.6783	3.50911	2.55505e-16
AT1G14040	EXS (ERD1/XPR1/SYG1) family protein	3.72628	0.778597	-2.25307	5.24956e-10
AT1G14060	GCK domain-containing protein	48.7253	9.08515	-2.42378	8.27817e-14
AT1G14070	FUCOSYLTRANSFERASE 7 (FUT7)	4.60046	1.7811	-1.36584	0.00127771
AT1G14080	FUCOSYLTRANSFERASE 6 (FUT6)	1.02192	0.106418	-3.19363	0.000310866
AT1G14090		4.40543	1.58775	-1.47174	2.26622e-05
AT1G14120	2-oxoglutarate (2OG) and Fe(II)-dependent oxygenase superfamily protein	3.6706	0.0326974	-6.58792	5.56216e-15
AT1G14130	ATDAO; DAO1; DIOXYGENASE FOR AUXIN OXIDATION 1	30.7523	5.42207	-2.50362	8.04441e-17
AT1G14150	PHOTOSYNTHETIC NDH SUBCOMPLEX L 2 (PnsL2)	0.0485448	132.445	11.4747	7.24885e-99
AT1G14170	RNA-binding KH domain-containing protein	19.2448	4.93297	-1.96158	6.34418e-06
AT1G14180	RING/U-box superfamily protein	2.93691	1.40014	-1.07075	0.0237869
AT1G14200	RING/U-box superfamily protein	17.0012	44.8389	1.39926	0.0067705
AT1G14205	Ribosomal L18p/L5e family protein	0.440278	3.87034	3.11943	2.61977e-07
AT1G14210	Ribonuclease T2 family protein	40.2091	10.8067	-1.89749	1.42586e-07
AT1G14230	GDA1/CD39 nucleoside phosphatase family protein	14.2884	7.40177	-0.947863	0.000549772
AT1G14240	GDA1/CD39 nucleoside phosphatase family protein	3.38029	0.100507	-5.0615	2.84265e-13
AT1G14250	GDA1/CD39 nucleoside phosphatase family protein	0.324432	4.03534	3.63576	8.16091e-09
AT1G14260	RING/FYVE/PHD zinc finger superfamily protein	4.11562	0.966775	-2.07984	5.58567e-05
AT1G14270	CAAX amino terminal protease family protein	0.458407	30.5202	6.04644	7.44228e-38
AT1G14280	PHYTOCHROME KINASE SUBSTRATE 2 (PKS2)	0.016155	33.6699	10.749	2.07989e-62
AT1G14300	ARM repeat superfamily protein	11.5223	4.80151	-1.26171	1.00932e-05
AT1G14310	Haloacid dehalogenase-like hydrolase (HAD) superfamily protein	3.11434	5.42258	0.800035	0.0326913
AT1G14320	SUPPRESSOR OF ACAULIS 52 (SAC52)	475.586	250.174	-0.926809	0.0061625
AT1G14330	Galactose oxidase/kelch repeat superfamily protein	23.3799	11.5894	-1.01166	0.000964061
AT1G14345	NAD(P)-linked oxidoreductase superfamily protein	2.04106	186.028	6.50492	2.42902e-35
AT1G14350	FOUR LIPS (FLP)	14.5498	6.1492	-1.24314	0.0015357
AT1G14370	PROTEIN KINASE 2A (APK2A)	13.7498	28.2113	1.03729	0.00270431
AT1G14390	Leucine-rich repeat protein kinase family protein	6.14489	0.46268	-3.74737	3.76705e-16
AT1G14440	HOMEOBOX PROTEIN 31 (HB31)	0	1.82268	10.3965	5.10034e-23
AT1G14480	Ankyrin repeat family protein	4.17797	17.1644	2.03678	7.85558e-08
AT1G14490	AHL28; AT-HOOK MOTIF NUCLEAR LOCALIZED PROTEIN 28	1.03321	0.36909	-1.50609	0.0120968
AT1G14510	ALFIN-LIKE 7 (AL7)	32.6699	18.4956	-0.820484	0.00240018
AT1G14520	MYO-INOSITOL OXYGENASE 1 (MIOX1)	0.263048	3.59845	3.76151	4.16342e-08
AT1G14540	PEROXIDASE 4 (PER4)	1.18587	34.2103	4.8507	2.6798e-09
AT1G14570	ATPUX7; PLANT UBX DOMAIN-CONTAINING PROTEIN 7; PUX7	22.2246	13.3944	-0.730281	0.00854477
AT1G14580	BLJ; BLUEJAY	0.00367515	5.31245	10.2509	1.51168e-43
AT1G14590	Nucleotide-diphospho-sugar transferase family protein	2.75367	5.01582	0.863884	0.025751
AT1G14610	TWIN 2 (TWN2)	39.0489	19.5779	-0.996115	0.00130274
AT1G14620	DECOY (DECOY)	19.6744	4.67227	-2.07548	3.71078e-13
AT1G14630	XRI1-like protein	17.0892	0.868686	-4.29891	1.2288e-20
AT1G14640	SWAP (Suppressor-of-White-APricot)/surp domain-containing protein	6.63724	2.72919	-1.28001	0.00290268
AT1G14642	hypothetical protein	4.57355	1.10128	-2.00129	0.00205049
AT1G14650	SWAP (Suppressor-of-White-APricot)/surp domain-containing protein / ubiquitin family protein	37.7181	24.31	-0.633693	0.0314954
AT1G14680	early endosome antigen	5.476	0.756531	-2.85453	6.32256e-10
AT1G14700	PURPLE ACID PHOSPHATASE 3 (PAP3)	0.182841	6.63618	5.15777	8.89913e-10
AT1G14710	hydroxyproline-rich glycoprotein family protein	40.6054	18.2568	-1.15336	0.0001009
AT1G14740	TITANIA 1 (TTA1)	72.3608	111.003	0.617294	0.0488665
AT1G14770	RING/FYVE/PHD zinc finger superfamily protein	5.15097	2.00762	-1.35875	0.000387162
AT1G14780	MAC/Perforin domain-containing protein	6.47036	1.34083	-2.26631	0.000355319
AT1G14820	Sec14p-like phosphatidylinositol transfer family protein	12.8993	7.10118	-0.861146	0.0129692
AT1G14840	MICROTUBULE-ASSOCIATED PROTEINS 70-4 (MAP70-4)	2.33393	9.16285	1.9717	4.41509e-07
AT1G14850	NUCLEOPORIN 155 (NUP155)	16.5682	5.58408	-1.56905	3.23261e-08
AT1G14870	PLANT CADMIUM RESISTANCE 2 (PCR2)	112.272	43.8658	-1.35536	0.027185
AT1G14880	PLANT CADMIUM RESISTANCE 1 (PCR1)	0.153637	222.203	10.4765	1.08908e-18
AT1G14890	Plant invertase/pectin methylesterase inhibitor superfamily protein	188.821	9.41351	-4.32451	4.21108e-34
AT1G14900	HIGH MOBILITY GROUP A (HMGA)	45.5299	3.80905	-3.57667	2.82661e-26
AT1G14920	GIBBERELLIC ACID INSENSITIVE (GAI)	5.85405	11.5428	0.979478	0.00927483
AT1G14970	O-fucosyltransferase family protein	3.82198	1.43774	-1.41116	5.43161e-05
AT1G14980	CHAPERONIN 10 (CPN10)	75.0397	45.7892	-0.713124	0.0437243
AT1G15000	SERINE CARBOXYPEPTIDASE-LIKE 50 (scpl50)	6.68814	12.9152	0.948581	0.0161882
AT1G15010	mediator of RNA polymerase II transcription subunit	3.47779	584.24	7.39336	2.05667e-26
AT1G15030	hypothetical protein (DUF789)	6.96226	28.4733	2.03154	3.85374e-13
AT1G15040	GLUTAMINE AMIDOTRANSFERASE 1_2.1 (GAT1_2.1)	5.799	0.795297	-2.85865	0.000414641
AT1G15060	alpha/beta hydrolase family protein	6.11394	14.0601	1.20099	6.13685e-05
AT1G15100	RING-H2 FINGER A2A (RHA2A)	45.0825	18.1495	-1.31346	0.00102956
AT1G15110	PHOSPHATIDYLSERINE SYNTHASE 1 (PSS1)	10.2002	1.68177	-2.60304	6.23491e-17
AT1G15125	S-adenosyl-L-methionine-dependent methyltransferases superfamily protein	2.14026	27.5497	3.68391	7.90076e-06
AT1G15140	FAD/NAD(P)-binding oxidoreductase	6.67387	59.8249	3.16435	1.27702e-24
AT1G15160	MATE efflux family protein	1.76263	3.57827	1.0184	0.0367094
AT1G15165	RING/FYVE/PHD zinc finger superfamily protein	1.03885	2.80804	1.42992	0.00490065
AT1G15170	MATE efflux family protein	22.3009	10.8902	-1.03481	0.00123326
AT1G15175		0.106049	3.11897	4.8337	8.95298e-16
AT1G15180	MATE efflux family protein	1.27338	25.837	4.34134	3.01028e-31
AT1G15190	Fasciclin-like arabinogalactan family protein	3.69186	0.994388	-1.88644	4.37451e-05
AT1G15200	protein-protein interaction regulator family protein	38.973	17.7733	-1.13288	8.04207e-05
AT1G15210	ATP-BINDING CASSETTE G35 (ABCG35)	16.0166	1.3548	-3.56072	2.40191e-26
AT1G15215	SAWADEE HOMEODOMAIN HOMOLOG 1 (SHH1)	6.19292	2.17154	-1.50855	2.40888e-05
AT1G15230	hypothetical protein	41.2547	20.1388	-1.03446	0.000177879
AT1G15250	Zinc-binding ribosomal protein family protein	19.3416	11.4188	-0.762136	0.0301202
AT1G15260	LOW protein: ATP-dependent RNA helicase-like protein	0.140344	26.9412	7.54623	4.67432e-29
AT1G15290	Tetratricopeptide repeat (TPR)-like superfamily protein	0.616465	55.4419	6.48932	7.5762e-40
AT1G15310	SIGNAL RECOGNITION PARTICLE 54 KDA SUBUNIT (ATHSRP54A)	8.72074	0.408556	-4.39985	7.80728e-26
AT1G15330	Cystathionine beta-synthase (CBS) protein	1.29583	0.00817826	-6.82213	9.21622e-07
AT1G15350	DUF4050 family protein	18.0362	9.58861	-0.910509	0.00366459
AT1G15380	GLYOXYLASE I 4 (GLYI4)	29.3846	0.0614984	-8.79496	1.46604e-29
AT1G15385	cotton fiber protein	26.3222	0.0510789	-8.95969	3.5794e-23
AT1G15390	PEPTIDE DEFORMYLASE 1A (PDF1A)	9.64489	19.5682	1.01954	0.00259089
AT1G15410	aspartate-glutamate racemase family	4.02333	14.2007	1.81811	4.87818e-06
AT1G15420	LANT-SPECIFIC COMPONENT OF THE PRE- RRNA PROCESSING COMPLEX1; PCP1	32.939	7.75468	-2.08748	6.44287e-14
AT1G15440	PERIODIC TRYPTOPHAN PROTEIN 2 (PWP2)	20.6882	3.83665	-2.43205	1.63957e-17
AT1G15480	Tetratricopeptide repeat (TPR)-like superfamily protein	9.48594	1.32077	-2.83747	1.36504e-15
AT1G15490	alpha/beta-Hydrolases superfamily protein	5.27574	3.23959	-0.70366	0.042001
AT1G15510	EARLY CHLOROPLAST BIOGENESIS2 (ECB2)	1.70594	3.24989	0.929508	0.0212082
AT1G15530	Concanavalin A-like lectin protein kinase family protein	5.88907	13.8937	1.23796	5.20951e-05
AT1G15550	GIBBERELLIN 3-OXIDASE 1 (GA3OX1)	0.136629	6.16636	5.46082	4.07582e-07
AT1G15570	CYCLIN A2;3 (CYCA2;3)	4.10316	0.986426	-2.05629	5.39102e-07
AT1G15580	INDOLE-3-ACETIC ACID INDUCIBLE 5 (IAA5)	54.4047	1.96035	-4.78988	1.32962e-24
AT1G15610	transmembrane protein	4.38164	0.0260695	-7.12644	1.27678e-10
AT1G15630	transmembrane protein	10.8746	0	-12.2212	7.36855e-18
AT1G15640	transmembrane protein	10.7872	0	-12.2316	3.16701e-19
AT1G15660	CENTROMERE PROTEIN C (CENP-C)	9.10461	2.12309	-2.09837	2.63125e-12
AT1G15670	Galactose oxidase/kelch repeat superfamily protein	62.2692	5.64544	-3.46012	1.52433e-10
AT1G15690	(AVP1)	160.022	401.461	1.32698	0.000165875
AT1G15720	TRF-LIKE 5 (TRFL5)	3.84831	1.64386	-1.23113	0.00598366
AT1G15730	Cobalamin biosynthesis CobW-like protein	1.26496	29.4967	4.53793	1.57355e-35
AT1G15740	Leucine-rich repeat family protein	18.3196	48.8966	1.41635	2.12966e-05
AT1G15760	Sterile alpha motif (SAM) domain-containing protein	0.575765	2.6926	2.19656	0.0017106
AT1G15780	MED15_1; MEDIATOR 15_1; NON-RECOGNITION-OF-BTH 4; NRB4	18.3683	11.9023	-0.625756	0.0438727
AT1G15800	hypothetical protein	5.89216	3.45213	-0.76845	0.0401968
AT1G15820	LIGHT HARVESTING COMPLEX PHOTOSYSTEM II SUBUNIT 6 (LHCB6)	8.89664	2996.55	8.39485	2.40735e-27
AT1G15825	hydroxyproline-rich glycoprotein family protein	0.0665854	27.0071	8.43538	8.32282e-23
AT1G15830	hypothetical protein	0.113008	21.0257	7.4933	1.06733e-32
AT1G15870	Mitochondrial glycoprotein family protein	2.64657	0.434798	-2.59155	2.56693e-07
AT1G15880	GOLGI SNARE 11 (GOS11)	16.017	26.9631	0.751432	0.00914583
AT1G15885	hypothetical protein	0.967968	9.00957	3.20517	6.97044e-10
AT1G15890	Disease resistance protein (CC-NBS-LRR class) family	0.257312	8.16863	4.99538	1.66805e-27
AT1G15920	Polynucleotidyl transferase%2C ribonuclease H-like superfamily protein	20.1863	11.7052	-0.785908	0.00363948
AT1G15940	ATPDS5E; PDS5E	19.8925	8.08809	-1.29862	4.22711e-06
AT1G15960	NRAMP METAL ION TRANSPORTER 6 (NRAMP6)	0.972984	6.86657	2.81671	0.00107353
AT1G15980	PHOTOSYNTHETIC NDH SUBCOMPLEX B 1 (PnsB1)	0.0732272	179.366	11.201	2.19502e-58
AT1G16000	GAG1At protein	15.7511	7.8857	-0.996684	0.00503541
AT1G16020	CALCIUM CAFFEINE ZINC SENSITIVITY 1A; CCZ1A	2.78778	6.75002	1.27438	0.000662329
AT1G16040	phosphatidylinositol-glycan biosynthesis class F-like protein	8.07764	3.21239	-1.32819	8.41206e-05
AT1G16070	TUBBY LIKE PROTEIN 8 (TLP8)	2.91234	0.420589	-2.807	5.8962e-07
AT1G16080	nuclear protein	8.26453	140.276	4.08412	5.29147e-32
AT1G16090	WALL ASSOCIATED KINASE-LIKE 7 (WAKL7)	1.81391	8.0979	2.15573	1.41784e-06
AT1G16110	WALL ASSOCIATED KINASE-LIKE 6 (WAKL6)	2.08103	19.3074	3.21142	1.72489e-18
AT1G16130	WALL ASSOCIATED KINASE-LIKE 2 (WAKL2)	0.515401	31.6974	5.93652	1.69041e-27
AT1G16170	ephrin-A3 protein	4.22001	26.8875	2.6705	4.60505e-15
AT1G16220	Protein phosphatase 2C family protein	6.26442	1.25336	-2.31793	3.86841e-09
AT1G16240	SYNTAXIN OF PLANTS 51 (SYP51)	29.9303	46.0734	0.622376	0.0312521
AT1G16260	Wall-associated kinase family protein	3.3993	31.6713	3.21883	3.55813e-26
AT1G16280	RNA HELICASE 36 (RH36)	7.57866	3.60636	-1.07252	0.00120366
AT1G16300	GLYCERALDEHYDE-3-PHOSPHATE DEHYDROGENASE OF PLASTID 2 (GAPCP-2)	9.00158	1.12736	-2.99888	3.18225e-21
AT1G16320	plant/protein (DUF2358)	7.89856	76.6554	3.27787	7.27118e-19
AT1G16330	CYCLIN B3;1 (CYCB3;1)	1.17671	0.20651	-2.51775	5.71415e-07
AT1G16340	(ATKDSA2)	4.53647	2.55525	-0.828278	0.0184013
AT1G16350	Aldolase-type TIM barrel family protein	45.0099	19.3956	-1.21469	1.59591e-05
AT1G16370	ORGANIC CATION/CARNITINE TRANSPORTER 6 (OCT6)	1.65189	39.7925	4.58639	6.85813e-17
AT1G16400	"CYTOCHROME P450, FAMILY 79, SUBFAMILY F, POLYPEPTIDE 2" (CYP79F2)	0	4.25078	11.7722	2.24977e-28
AT1G16410	CYTOCHROME P450 79F1 (CYP79F1)	0	68.0288	15.9506	1.10404e-76
AT1G16420	METACASPASE 8 (MC8)	0.0350539	12.2422	8.29636	1.96228e-41
AT1G16445	S-adenosyl-L-methionine-dependent methyltransferases superfamily protein	0.146553	1.80997	3.57822	4.95957e-06
AT1G16460	RHODANESE HOMOLOGUE 2 (RDH2)	9.97823	20.2767	1.02241	0.000745818
AT1G16480	Tetratricopeptide repeat (TPR)-like superfamily protein	1.73442	0.950218	-0.867945	0.0326687
AT1G16520	interactor of constitutive active ROPs protein	16.6809	5.67591	-1.5558	5.79004e-08
AT1G16530	ASYMMETRIC LEAVES 2-LIKE 9 (ASL9)	8.80328	1.44882	-2.60245	1.60592e-07
AT1G16540	ABA DEFICIENT 3 (ABA3)	6.66178	1.6704	-1.99288	5.31342e-09
AT1G16550		3.70774	1.90081	-0.966821	0.0372087
AT1G16610	ARGININE/SERINE-RICH 45 (SR45)	19.494	11.9887	-0.70149	0.00895005
AT1G16630	transmembrane protein	3.6818	0.805143	-2.19652	3.85342e-05
AT1G16650	S-adenosyl-L-methionine-dependent methyltransferases superfamily protein	3.97725	2.14402	-0.89069	0.0143203
AT1G16700	Alpha-helical ferredoxin	11.0166	23.4288	1.08843	3.16417e-05
AT1G16720	HIGH CHLOROPHYLL FLUORESCENCE PHENOTYPE 173 (HCF173)	4.97714	196.638	5.30388	3.89635e-42
AT1G16730	UNKNOWN PROTEIN 6 (UP6)	0.10883	25.403	7.82095	1.28666e-24
AT1G16740	Ribosomal protein L20	18.4755	10.517	-0.81335	0.005349
AT1G16750	GPI-anchored adhesin-like protein%2C putative (Protein of unknown function%2C DUF547)	0.0266682	3.18946	6.94236	8.12935e-21
AT1G16790	ribosomal protein-like protein	11.5895	6.02005	-0.945229	0.0189994
AT1G16800	P-loop containing nucleoside triphosphate hydrolases superfamily protein	3.86028	1.05316	-1.87518	3.16549e-11
AT1G16830	Pentatricopeptide repeat (PPR) superfamily protein	2.64146	0.447113	-2.5612	4.60902e-08
AT1G16850	transmembrane protein	15.6778	7.77396	-1.01256	0.00858688
AT1G16870	mitochondrial 28S ribosomal protein S29-like protein	13.5432	7.96907	-0.765029	0.00504383
AT1G16880	ACT DOMAIN REPEATS 11 (ACR11)	3.60395	210.063	5.86413	4.72765e-56
AT1G16900	EMS-MUTAGENIZED BRI1 SUPPRESSOR 3 (EBS3)	10.9127	4.52426	-1.26864	9.78928e-06
AT1G16930	F-box/RNI-like/FBD-like domains-containing protein	0.542021	2.99352	2.45287	1.32448e-06
AT1G16960	Ubiquitin domain-containing protein	0.0070777	6.65092	9.57231	1.87528e-28
AT1G16970	KU70 HOMOLOG (KU70)	4.42658	2.5596	-0.789523	0.00899007
AT1G17020	SENESCENCE-RELATED GENE 1 (SRG1)	28.6558	0.123214	-7.82947	1.8983e-42
AT1G17050	SOLANESYL DIPHOSPHATE SYNTHASE 2 (SPS2)	12.1605	82.7636	2.76632	6.17811e-09
AT1G17060	CYTOCHROME P450 72C1 (CYP72C1)	23.7926	2.30123	-3.36986	1.00163e-26
AT1G17070	GC-rich sequence DNA-binding factor-like protein with Tuftelin interacting domain-containing protein	9.96312	4.10969	-1.27617	1.01789e-05
AT1G17100	SOUL heme-binding family protein	2.57103	214.894	6.38567	5.1895e-37
AT1G17120	CATIONIC AMINO ACID TRANSPORTER 8 (CAT8)	14.516	23.2967	0.682012	0.0323381
AT1G17140	INTERACTOR OF CONSTITUTIVE ACTIVE ROPS 1 (ICR1)	6.71476	18.0956	1.42926	0.0014667
AT1G17147	VQ motif-containing protein	0.983769	11.8639	3.60257	5.90261e-07
AT1G17170	GLUTATHIONE S-TRANSFERASE TAU 24 (GSTU24)	70.4946	1.50681	-5.54925	3.52342e-29
AT1G17180	GLUTATHIONE S-TRANSFERASE TAU 25 (GSTU25)	15.3553	0.530748	-4.87784	7.77753e-11
AT1G17190	GLUTATHIONE S-TRANSFERASE TAU 26 (GSTU26)	10.7027	1.5175	-2.81906	1.41909e-09
AT1G17200	CASP-LIKE PROTEIN 2A1; CASPL2A1	2.64694	16.1134	2.60231	8.63088e-07
AT1G17220	FU-GAERI1 (FUG1)	3.64509	136.402	5.22513	6.47786e-32
AT1G17230	Leucine-rich receptor-like protein kinase family protein	1.19391	4.41725	1.88865	1.11477e-05
AT1G17290	ALANINE AMINOTRANSFERAS (AlaAT1)	144.141	74.0589	-0.960664	0.00954999
AT1G17310	MADS-box transcription factor family protein	4.49047	0.0212803	-7.62314	1.12562e-14
AT1G17340	SAC5; SUPPRESSOR OF ACTIN 5	2.10369	20.6748	3.29785	3.7089e-26
AT1G17350	NADH:ubiquinone oxidoreductase intermediate-associated protein 30	3.94569	2.24043	-0.81765	0.0323563
AT1G17360	LOW protein: protein phosphatase 1 regulatory subunit-like protein	7.8267	50.5776	2.6918	5.80703e-16
AT1G17380	JASMONATE-ZIM-DOMAIN PROTEIN 5 (JAZ5)	5.445	117.916	4.4378	4.42339e-36
AT1G17410	Nucleoside diphosphate kinase family protein	3.73664	7.84528	1.06757	0.00677847
AT1G17420	LIPOXYGENASE 3 (LOX3)	3.41897	314.955	6.52562	9.82298e-30
AT1G17430	alpha/beta-Hydrolases superfamily protein	0.531101	6.00293	3.4921	1.62289e-12
AT1G17460	TRF-LIKE 3 (TRFL3)	3.9315	0.78132	-2.32227	5.25305e-06
AT1G17480	IQ-DOMAIN 7 (IQD7)	4.9034	1.32454	-1.88616	7.30711e-06
AT1G17500	ATPase E1-E2 type family protein / haloacid dehalogenase-like hydrolase family protein	21.0646	7.97886	-1.39975	1.82955e-05
AT1G17510	hypothetical protein	15.6753	4.40534	-1.82733	9.49647e-07
AT1G17520	Homeodomain-like/winged-helix DNA-binding family protein	8.08225	4.96251	-0.703367	0.0176184
AT1G17530	TRANSLOCASE OF INNER MITOCHONDRIAL MEMBRANE 23 (TIM23-1)	72.2775	32.6467	-1.14622	5.84596e-05
AT1G17560	HUELLENLOS (HLL)	8.36023	2.03835	-2.0323	2.4071e-07
AT1G17580	MYOSIN 1 (MYA1)	7.95845	5.11973	-0.636275	0.0215144
AT1G17600	Disease resistance protein (TIR-NBS-LRR class) family	0.305756	16.4258	5.75104	1.2661e-50
AT1G17610	Disease resistance protein (TIR-NBS class)	0.111984	16.2865	7.13494	1.87924e-37
AT1G17620	Late embryogenesis abundant (LEA) hydroxyproline-rich glycoprotein family	45.7179	262.754	2.52297	4.25018e-10
AT1G17630	CELL WALL MAINTAINER 1; CWM1	1.97143	0.806804	-1.28174	0.00388349
AT1G17640	RNA-binding (RRM/RBD/RNP motifs) family protein	0.956351	2.95353	1.62188	0.000929175
AT1G17650	GLYOXYLATE REDUCTASE 2 (GLYR2)	1.74528	22.0964	3.65853	3.77049e-23
AT1G17690	NUCLEOLAR FACTOR 1 (NOF1)	6.9872	3.17055	-1.14087	4.75926e-05
AT1G17720	(ATB BETA)	21.3953	12.7202	-0.749941	0.0106205
AT1G17730	VACUOLAR PROTEIN SORTING 46.1 (VPS46.1)	19.968	34.5843	0.792348	0.00271516
AT1G17745	3-PHOSPHOGLYCERATE DEHYDROGENASE (PGDH)	20.3158	6.63676	-1.61315	7.44186e-05
AT1G17750	PEP1 RECEPTOR 2 (PEPR2)	1.6664	10.0261	2.58841	3.81024e-11
AT1G17760	(CSTF77)	1.65235	2.82606	0.773278	0.0232859
AT1G17790	DNA-binding bromodomain-containing protein	4.41739	7.33287	0.729516	0.0418974
AT1G17820	testis-expressed sequence 2-like protein (DUF2404)	4.61588	7.40442	0.681931	0.0177484
AT1G17830	hypothetical protein (DUF789)	5.57851	1.58492	-1.81503	1.83955e-05
AT1G17840	ATP-BINDING CASSETTE G11 (ABCG11)	11.1462	21.1208	0.921692	0.0241403
AT1G17850	Rhodanese/Cell cycle control phosphatase superfamily protein	1.98077	3.66699	0.886778	0.0293799
AT1G17870	ETHYLENE-DEPENDENT GRAVITROPISM-DEFICIENT AND YELLOW-GREEN-LIKE 3 (EGY3)	1.67908	17.6584	3.39272	4.54934e-05
AT1G17890	(GER2)	36.5746	23.144	-0.659587	0.0293589
AT1G17930	MAIN; MAINTENANCE OF MERISTEMS	7.46669	3.55914	-1.06765	0.000516196
AT1G17940	Endosomal targeting BRO1-like domain-containing protein	1.29888	2.49681	0.941196	0.0282504
AT1G17960	Threonyl-tRNA synthetase	6.55041	0.237942	-4.77242	3.81564e-13
AT1G17970	RING/U-box superfamily protein	0.795813	4.7846	2.58935	4.4226e-07
AT1G17980	POLY(A) POLYMERASE 1 (PAPS1)	7.41055	27.9017	1.9129	5.9548e-11
AT1G17990	FMN-linked oxidoreductases superfamily protein	0.570919	48.8391	6.42507	9.94589e-37
AT1G18000	Major facilitator superfamily protein	0.187668	19.0672	6.68859	3.22721e-37
AT1G18010	Major facilitator superfamily protein	0.243719	19.3578	6.32171	1.18008e-28
AT1G18020	FMN-linked oxidoreductases superfamily protein	0.661041	58.6459	6.47625	5.52451e-38
AT1G18030	Protein phosphatase 2C family protein	2.66122	7.96753	1.58028	1.42376e-05
AT1G18060	microbial collagenase	0.806192	110.296	7.09861	2.57344e-66
AT1G18080	(ATARCA)	265.752	160.282	-0.729527	0.0300895
AT1G18100	(E12A11)	5.67809	0.0046828	-10.1416	4.05056e-20
AT1G18150	(ATMPK8)	6.49139	10.0116	0.625677	0.0323123
AT1G18170	FKBP-like peptidyl-prolyl cis-trans isomerase family protein	0.107879	40.5492	8.46781	2.29439e-62
AT1G18190	GOLGIN CANDIDATE 2 (GC2)	8.93376	5.18679	-0.78404	0.00376103
AT1G18200	RAB GTPASE HOMOLOG A6B (RABA6b)	0.859175	21.545	4.65216	6.17965e-16
AT1G18210	Calcium-binding EF-hand family protein	41.9016	191.285	2.19069	6.7193e-13
AT1G18250	(ATLP-1)	26.1522	4.3135	-2.60239	5.80822e-09
AT1G18265	zein-binding protein (Protein of unknown function%2C DUF593)	4.77082	1.41637	-1.74527	0.00947157
AT1G18300	NUDIX HYDROLASE HOMOLOG 4 (NUDT4)	3.12661	382.15	6.93108	5.1773e-53
AT1G18320	Mitochondrial import inner membrane translocase subunit Tim17/Tim22/Tim23 family protein	2.7161	0.620436	-2.13352	2.80771e-06
AT1G18370	HINKEL (HIK)	7.17047	0.96931	-2.89135	1.55128e-12
AT1G18390	LEAF RUST 10 DISEASE-RESISTANCE LOCUS RECEPTOR- LIKE PROTEIN KINASE-LIKE 1.1; LRK10L1.1	1.49265	6.80249	2.19005	1.63782e-06
AT1G18400	BR ENHANCED EXPRESSION 1 (BEE1)	0.0695792	3.7631	5.76827	1.78072e-19
AT1G18440	Peptidyl-tRNA hydrolase family protein	3.09902	10.2661	1.72647	6.52958e-06
AT1G18450	ACTIN-RELATED PROTEIN 4 (ARP4)	12.9099	7.83329	-0.721068	0.00819316
AT1G18460	alpha/beta-Hydrolases superfamily protein	2.59519	25.3565	3.28747	5.51804e-12
AT1G18470	Transmembrane Fragile-X-F-associated protein	7.83003	14.3467	0.873897	0.00630036
AT1G18480	SHEWENELLA-LIKE PROTEIN PHOSPHATASE 2 (SLP2)	35.8887	11.9247	-1.58919	4.82168e-09
AT1G18485	Pentatricopeptide repeat (PPR) superfamily protein	1.1353	8.6394	2.92726	3.17191e-14
AT1G18490	PCO3; PLANT CYSTEINE OXIDASE 3	3.03119	7.03292	1.21235	0.00105324
AT1G18540	Ribosomal protein L6 family protein	345.277	138.311	-1.31992	7.87824e-05
AT1G18550	ATP binding microtubule motor family protein	3.38532	1.11144	-1.60961	0.000120269
AT1G18570	MYB DOMAIN PROTEIN 51 (MYB51)	15.1263	33.2466	1.13665	0.000584859
AT1G18590	SULFOTRANSFERASE 17 (SOT17)	3.80221	43.4786	3.51364	1.12417e-29
AT1G18600	RHOMBOID-LIKE PROTEIN 12 (RBL12)	4.57971	7.50572	0.712123	0.0297511
AT1G18620	TON1 RECRUITING MOTIF 3 (TRM3)	2.06568	21.9897	3.41073	2.78701e-24
AT1G18650	PLASMODESMATA CALLOSE-BINDING PROTEIN 3 (PDCB3)	3.73391	9.22869	1.30384	0.00208643
AT1G18660	zinc finger (C3HC4-type RING finger) family protein	5.57973	16.6495	1.5768	2.424e-07
AT1G18670	IMPAIRED IN BABA-INDUCED STERILITY 1 (IBS1)	19.4535	3.63401	-2.41969	1.07982e-16
AT1G18680	HNH endonuclease domain-containing protein	2.48256	6.19622	1.32036	0.000702792
AT1G18690	XYLOGLUCAN XYLOSYLTRANSFERASE 4 (XXT4)	4.22307	1.731	-1.28289	0.000933033
AT1G18710	MYB DOMAIN PROTEIN 47 (MYB47)	0.0518425	5.29764	6.58777	4.79257e-24
AT1G18720	ER membrane protein%2C putative (DUF962)	29.7933	57.3226	0.944379	0.00202337
AT1G18730	PHOTOSYNTHETIC NDH SUBCOMPLEX B 4 (PnsB4)	0.0399703	82.5317	11.038	1.89214e-105
AT1G18740	ROH1%2C putative (DUF793)	25.1129	425.179	4.08143	3.669e-30
AT1G18745		11.7641	3.68836	-1.67538	2.04715e-05
AT1G18750	AGAMOUS-LIKE 65 (AGL65)	0.762673	5.11412	2.74264	8.15646e-09
AT1G18773	acyl thioesterase-like protein	1.04052	5.8163	2.47444	3.07438e-06
AT1G18800	NAP1-RELATED PROTEIN 2 (NRP2)	21.2344	6.51976	-1.70472	2.15406e-09
AT1G18810	phytochrome kinase substrate-like protein	0	9.81993	12.2893	3.654e-28
AT1G18830	Transducin/WD40 repeat-like superfamily protein	7.08329	0.170197	-5.3761	1.76351e-07
AT1G18850	hypothetical protein	19.5573	4.32526	-2.17945	6.30821e-12
AT1G18860	WRKY DNA-BINDING PROTEIN 61 (WRKY61)	1.93054	0.125423	-3.87726	0.000212659
AT1G18880	NITRATE TRANSPORTER 1.9 (NRT1.9)	0.0404541	3.65264	6.46679	2.90356e-11
AT1G18890	CALCIUM-DEPENDENT PROTEIN KINASE 1 (CDPK1)	17.6183	56.8488	1.69015	1.48825e-07
AT1G18900	Pentatricopeptide repeat (PPR) superfamily protein	8.09873	16.7235	1.04553	0.000362372
AT1G18910	zinc ion binding protein	5.51124	2.77027	-0.991153	0.00356758
AT1G18950	DDT domain superfamily	10.0575	6.4557	-0.639678	0.0159906
AT1G18980	RmlC-like cupins superfamily protein	2.06425	0.0611044	-5.01252	9.24631e-10
AT1G19000	Homeodomain-like superfamily protein	36.9746	190.664	2.36627	2.37251e-13
AT1G19010	hypothetical protein	2.44135	7.293	1.57843	6.61566e-06
AT1G19020	CDP-diacylglycerol-glycerol-3-phosphate 3-phosphatidyltransferase	30.008	323.009	3.42883	3.33209e-14
AT1G19025	DNA repair metallo-beta-lactamase family protein	1.59942	3.74886	1.23138	0.0109279
AT1G19050	RESPONSE REGULATOR 7 (ARR7)	8.24253	37.3973	2.18116	3.79388e-08
AT1G19070	F-box family protein	4.58175	2.00141	-1.18334	0.0261499
AT1G19100	DEFECTIVE IN MERISTEM SILENCING 11 (DMS11)	3.17168	1.66597	-0.929627	0.00285369
AT1G19110	inter-alpha-trypsin inhibitor heavy chain-like protein	9.39975	21.6064	1.20028	8.98388e-05
AT1G19115	DEEPER ROOTING 2; DRO2	9.41032	0.0475432	-7.54704	4.15981e-43
AT1G19120	Small nuclear ribonucleoprotein family protein	19.0697	12.4468	-0.615914	0.0395358
AT1G19140	ubiquinone biosynthesis COQ9-like protein	9.53154	23.3669	1.29301	0.000702254
AT1G19150	PHOTOSYSTEM I LIGHT HARVESTING COMPLEX GENE 6 (LHCA6)	0	174.815	16.2143	1.25332e-101
AT1G19180	JASMONATE-ZIM-DOMAIN PROTEIN 1 (JAZ1)	140.128	573.601	2.03332	5.088e-10
AT1G19190	alpha/beta-Hydrolases superfamily protein	3.21257	0.61322	-2.37376	8.97306e-05
AT1G19200	cyclin-dependent kinase%2C putative (DUF581)	7.20122	1.78621	-2.0074	8.29015e-06
AT1G19210	Integrase-type DNA-binding superfamily protein	0.576089	32.26	5.79424	1.21373e-14
AT1G19220	AUXIN RESPONSE FACTOR 19 (ARF19)	19.9632	6.12744	-1.70383	6.95646e-08
AT1G19230	Riboflavin synthase-like superfamily protein	2.21292	0.140844	-3.96393	2.77925e-15
AT1G19290	Pentatricopeptide repeat (PPR) superfamily protein	5.83437	2.7875	-1.06486	0.00228523
AT1G19300	PARVUS (PARVUS)	5.13423	47.2353	3.20174	5.61841e-29
AT1G19330	histone deacetylase complex subunit	3.37668	7.57236	1.16362	0.0113871
AT1G19350	BRI1-EMS-SUPPRESSOR 1 (BES1)	25.7995	114.429	2.14878	3.57299e-09
AT1G19360	REDUCED RESIDUAL ARABINOSE 3 (RRA3)	37.3401	19.1639	-0.961481	0.00157324
AT1G19370	membrane protein	14.57	8.74501	-0.735604	0.0113542
AT1G19380	sugar%2C putative (DUF1195)	38.2758	424.883	3.47278	9.04921e-19
AT1G19394	hypothetical protein	2.90947	1.01535	-1.50914	0.00126265
AT1G19396	hypothetical protein	1.53301	0.529122	-1.52098	0.00218001
AT1G19397	transmembrane protein	5.44749	1.59154	-1.7681	5.18368e-05
AT1G19400	Erythronate-4-phosphate dehydrogenase family protein	9.66483	55.1511	2.51238	4.20695e-12
AT1G19440	3-KETOACYL-COA SYNTHASE 4 (KCS4)	9.23141	21.2858	1.20443	0.000221095
AT1G19450	Major facilitator superfamily protein	3.4192	84.7898	4.63261	4.78542e-27
AT1G19510	RAD-LIKE 5 (RL5)	0	5.77832	11.1336	3.1806e-28
AT1G19520	NUCLEAR FUSION DEFECTIVE 5 (NFD5)	20.9528	8.21982	-1.35064	1.0519e-06
AT1G19530	DNA polymerase epsilon catalytic subunit A	121.407	0.0881937	-10.357	1.06744e-86
AT1G19540	NmrA-like negative transcriptional regulator family protein	9.23157	0.480992	-4.27175	9.11845e-18
AT1G19550	DEHYDROASCORBATE REDUCTASE; DHAR	5.38721	48.0649	3.15381	4.34961e-15
AT1G19570	DEHYDROASCORBATE REDUCTASE (DHAR1)	19.4432	182.246	3.22793	1.95356e-16
AT1G19600	pfkB-like carbohydrate kinase family protein	37.4175	18.5238	-1.01424	0.000471378
AT1G19640	JASMONIC ACID CARBOXYL METHYLTRANSFERASE (JMT)	0.064446	8.60732	7.0187	8.6945e-15
AT1G19650	Sec14p-like phosphatidylinositol transfer family protein	5.19243	10.8507	1.06265	0.00136961
AT1G19660	ATBBD2; BBD2; BIFUNCTIONAL NUCLEASE IN BASAL DEFENSE RESPONSE 2	13.7524	78.8246	2.51881	1.92019e-12
AT1G19670	CHLOROPHYLLASE 1 (CLH1)	0	62.8673	14.9673	8.57135e-108
AT1G19700	BEL1-LIKE HOMEODOMAIN 10 (BEL10)	2.89689	29.7721	3.36054	7.21943e-15
AT1G19710	UDP-Glycosyltransferase superfamily protein	13.6697	5.88299	-1.21671	6.76512e-05
AT1G19715	Mannose-binding lectin superfamily protein	1.09453	57.0021	5.70077	9.486e-62
AT1G19720	Pentatricopeptide repeat (PPR-like) superfamily protein	1.7955	54.011	4.90855	4.15762e-49
AT1G19740	ATP-dependent protease La (LON) domain protein	11.7659	96.0934	3.02935	6.4459e-30
AT1G19770	PURINE PERMEASE 14 (PUP14)	48.3108	702.969	3.8629	1.27418e-23
AT1G19790	SHI-RELATED SEQUENCE 7 (SRS7)	7.12547	0.0270208	-7.95808	3.0604e-42
AT1G19800	ATP-BINDING CASSETTE I14 (ABCI14)	12.5997	21.4073	0.764518	0.00610257
AT1G19835	filament-like protein (DUF869)	15.8744	38.3454	1.27226	9.47063e-06
AT1G19840	SAUR53; SMALL AUXIN UPREGULATED RNA 53	22.637	2.26134	-3.33617	8.87352e-08
AT1G19850	MONOPTEROS (MP)	65.3132	2.62686	-4.63609	1.29683e-35
AT1G19860	Zinc finger C-x8-C-x5-C-x3-H type family protein	4.30644	7.14958	0.730439	0.0328576
AT1G19870	IQ-DOMAIN 32 (iqd32)	27.7412	17.8726	-0.634128	0.032729
AT1G19880	Regulator of chromosome condensation (RCC1) family protein	19.8516	10.8449	-0.872144	0.000770762
AT1G19920	(APS2)	30.8663	70.492	1.19129	0.000990286
AT1G19940	GLYCOSYL HYDROLASE 9B5 (GH9B5)	0.198837	2.14927	3.41092	2.82859e-05
AT1G19950	HVA22-LIKE PROTEIN H (ATHVA22H) (HVA22H)	1.91504	4.21304	1.13526	0.0121574
AT1G19980	cytomatrix protein-like protein	4.41185	2.50877	-0.816383	0.0304454
AT1G19990	nucleolin	7.72224	3.84153	-1.01014	0.00809852
AT1G20010	TUBULIN BETA-5 CHAIN (TUB5)	0.262609	38.7591	7.21151	3.02547e-52
AT1G20020	FERREDOXIN-NADP(+)-OXIDOREDUCTASE 2 (FNR2)	0.155944	396.156	11.2981	1.78347e-59
AT1G20030	Pathogenesis-related thaumatin superfamily protein	0.415904	1.18334	1.50574	0.0224603
AT1G20060	ATP binding microtubule motor family protein	1.93674	0.346688	-2.48301	5.72182e-10
AT1G20070	hypothetical protein	2.21487	18.7413	3.07704	2.16968e-09
AT1G20140	SKP1-LIKE 4 (SK4)	21.8507	5.65092	-1.95318	1.41816e-08
AT1G20160	(ATSBT5.2)	0.0106005	6.17186	9.10128	4.38114e-45
AT1G20180	transmembrane protein (DUF677)	3.23544	0.00592853	-8.58883	6.48212e-16
AT1G20190	EXPANSIN 11 (EXPA11)	0	14.5894	12.7504	5.56153e-31
AT1G20200	EMBRYO DEFECTIVE 2719 (emb2719)	30.1299	19.2771	-0.644166	0.0242956
AT1G20220	Alba DNA/RNA-binding protein	25.853	12.87	-1.00704	0.00479866
AT1G20230	Pentatricopeptide repeat (PPR) superfamily protein	1.58743	0.718111	-1.1461	0.0091114
AT1G20260	V-ATPASE B SUBUNIT 3 (VAB3)	13.3177	46.534	1.80495	4.9559e-10
AT1G20270	2-oxoglutarate (2OG) and Fe(II)-dependent oxygenase superfamily protein	18.8701	4.87909	-1.95157	6.2281e-13
AT1G20310	syringolide-induced protein	0.995685	31.6515	4.98654	1.70283e-18
AT1G20340	DNA-DAMAGE-REPAIR/TOLERATION PROTEIN 112 (DRT112)	16.5443	5768.28	8.44512	2.9596e-18
AT1G20350	TRANSLOCASE INNER MEMBRANE SUBUNIT 17-1 (TIM17-1)	8.13973	48.9142	2.58684	0.00100112
AT1G20370	Pseudouridine synthase family protein	12.7153	5.09342	-1.32069	1.97349e-05
AT1G20380	Prolyl oligopeptidase family protein	3.13581	0.713282	-2.13078	8.62916e-08
AT1G20410	Pseudouridine synthase family protein	6.78235	1.96681	-1.78519	2.15908e-09
AT1G20430	hypothetical protein	50.7433	19.0313	-1.41444	2.48253e-07
AT1G20440	COLD-REGULATED 47 (COR47)	11.961	435.083	5.18422	1.95158e-09
AT1G20450	EARLY RESPONSIVE TO DEHYDRATION 10 (ERD10)	23.0665	699.406	4.92203	6.88607e-23
AT1G20470	SAUR-like auxin-responsive protein family	2.60298	6.13138	1.22917	0.0329787
AT1G20480	AMP-dependent synthetase and ligase family protein	2.3922	0.368051	-2.69335	3.23091e-09
AT1G20490	AMP-dependent synthetase and ligase family protein	0.836562	3.36866	2.00703	2.80836e-05
AT1G20510	OPC-8:0 COA LIGASE1 (OPCL1)	30.6738	462.911	3.91571	5.14945e-28
AT1G20540	Transducin/WD40 repeat-like superfamily protein	3.08482	5.62787	0.866729	0.022754
AT1G20550	O-fucosyltransferase family protein	2.64021	1.32906	-0.987444	0.0139368
AT1G20580	Small nuclear ribonucleoprotein family protein	30.5207	15.8966	-0.941199	0.000286784
AT1G20590	cyclin	2.1468	0.297354	-2.85307	4.08731e-07
AT1G20600	AP2/B3-like transcriptional factor family protein	1.62236	0.476626	-1.76345	0.00019022
AT1G20610	CYCLIN B2;3 (CYCB2;3)	5.38572	0.890662	-2.59806	1.55676e-11
AT1G20620	CATALASE 3 (CAT3)	118.619	379.38	1.6773	0.0190454
AT1G20630	CATALASE 1 (CAT1)	47.054	20.4187	-1.20405	0.00171303
AT1G20640	NIN-LIKE PROTEIN 4; NLP4	3.95117	8.32239	1.07339	0.00620839
AT1G20650	ALTERED SEED GERMINATION 5 (ASG5)	2.85215	16.6823	2.54627	1.03148e-08
AT1G20680	transport/golgi organization-like protein (DUF833)	0.0386466	1.55547	5.25889	3.00953e-14
AT1G20696	HIGH MOBILITY GROUP B3 (HMGB3)	70.4374	32.0043	-1.13779	0.000366583
AT1G20700	WUSCHEL RELATED HOMEOBOX 14 (WOX14)	7.38967	0.0346058	-7.72298	2.7223e-38
AT1G20720	RAD3-like DNA-binding helicase protein	1.6717	0.446112	-1.9093	1.89357e-05
AT1G20770	coiled-coil protein	15.9604	9.93883	-0.683046	0.0165609
AT1G20810	FKBP-like peptidyl-prolyl cis-trans isomerase family protein	2.11359	54.118	4.67601	2.01324e-41
AT1G20816	outer envelope pore-like protein	1.09878	7.8567	2.82959	1.71948e-08
AT1G20823	ATATL80	1.22918	350.04	8.14508	2.01977e-50
AT1G20830	MULTIPLE CHLOROPLAST DIVISION SITE 1 (MCD1)	4.0592	12.0417	1.5676	1.79695e-06
AT1G20840	TONOPLAST MONOSACCHARIDE TRANSPORTER1 (TMT1)	3.31221	12.6712	1.93658	7.8491e-07
AT1G20850	XYLEM CYSTEINE PEPTIDASE 2 (XCP2)	2.8768	32.5483	3.49913	5.12717e-06
AT1G20880	RNA-binding (RRM/RBD/RNP motifs) family protein	2.31545	5.02655	1.11838	0.00129922
AT1G20890	caveolin-1 protein	2.6413	5.35759	1.01903	0.0224373
AT1G20900	ESCAROLA (ESC)	14.0391	0.0351043	-8.44005	3.09327e-37
AT1G20920	P-loop containing nucleoside triphosphate hydrolases superfamily protein	28.3258	14.4495	-0.97099	0.0011802
AT1G20930	CYCLIN-DEPENDENT KINASE B2;2 (CDKB2;2)	6.05731	2.04167	-1.57196	4.70126e-05
AT1G20950	Phosphofructokinase family protein	21.833	11.0176	-0.987243	0.00621787
AT1G20960	EMBRYO DEFECTIVE 1507 (emb1507)	47.8073	27.1737	-0.815033	0.00671839
AT1G20970	calponin-like domain protein	52.8721	23.8309	-1.1495	0.000548717
AT1G21000	PLATZ transcription factor family protein	25.2903	96.8527	1.937	3.46291e-09
AT1G21050	MIZU-KUSSEI-like protein (Protein of unknown function%2C DUF617)	7.37307	20.9069	1.50232	0.00256742
AT1G21060	Serine/Threonine-kinase%2C putative (Protein of unknown function%2C DUF547)	2.52002	8.87709	1.81538	4.14976e-05
AT1G21065	secondary thiamine-phosphate synthase enzyme	6.78059	81.7242	3.59065	1.32464e-32
AT1G21070	UDP-RHA/UDP-GAL TRANSPORTER 2; URGT2	0.902801	4.85698	2.42358	2.11374e-08
AT1G21080	DNAJ heat shock N-terminal domain-containing protein	13.1787	27.6716	1.07024	0.000108845
AT1G21100	INDOLE GLUCOSINOLATE O-METHYLTRANSFERASE 1 (IGMT1)	3.36502	13.8809	2.04643	0.00121787
AT1G21120	INDOLE GLUCOSINOLATE O-METHYLTRANSFERASE 2 (IGMT2)	24.6814	12.9426	-0.930874	0.0214075
AT1G21130	INDOLE GLUCOSINOLATE O-METHYLTRANSFERASE 4 (IGMT4)	17.2777	178.233	3.36694	2.63203e-09
AT1G21140	Vacuolar iron transporter (VIT) family protein	1.22361	3.97237	1.69	0.01397
AT1G21150	Mitochondrial transcription termination factor family protein	2.96009	1.14292	-1.3766	0.00302813
AT1G21160	eukaryotic translation initiation factor 2 (eIF-2) family protein	13.4981	7.11383	-0.923949	0.00122788
AT1G21200	sequence-specific DNA binding transcription factor	8.29064	4.3292	-0.936045	0.00406183
AT1G21210	WALL ASSOCIATED KINASE 4 (WAK4)	0.408405	1.42038	1.79691	0.00123077
AT1G21240	WALL ASSOCIATED KINASE 3 (WAK3)	0.0269576	20.3537	9.47165	2.85161e-26
AT1G21250	CELL WALL-ASSOCIATED KINASE (WAK1)	0.572064	126.856	7.78527	1.65898e-18
AT1G21270	WALL-ASSOCIATED KINASE 2 (WAK2)	0.124814	43.8999	8.41528	3.49117e-28
AT1G21326	VQ motif-containing protein	0.390905	5.11857	3.71046	6.02454e-11
AT1G21350	Thioredoxin superfamily protein	4.18327	16.5577	1.98402	5.43131e-11
AT1G21380	Target of Myb protein 1	17.2446	32.8847	0.931321	0.000743163
AT1G21440	Phosphoenolpyruvate carboxylase family protein	10.3488	24.3524	1.23466	6.18212e-05
AT1G21460	(SWEET1)	1.40319	19.5469	3.79608	0.000463012
AT1G21500	hypothetical protein	0.223916	167.396	9.49706	2.17791e-27
AT1G21540	AMP-dependent synthetase and ligase family protein	0	2.49656	10.7598	4.74249e-25
AT1G21550	Calcium-binding EF-hand family protein	1.95048	48.864	4.64625	5.24049e-06
AT1G21560	hypothetical protein	10.4594	4.86236	-1.10437	0.000197977
AT1G21590	kinase with adenine nucleotide alpha hydrolases-like domain-containing protein	6.80994	28.8856	2.08491	9.20504e-12
AT1G21600	PLASTID TRANSCRIPTIONALLY ACTIVE 6 (PTAC6)	4.42831	26.1118	2.5588	3.11061e-15
AT1G21640	NAD KINASE 2 (NADK2)	8.78248	35.8596	2.0297	9.50545e-13
AT1G21650	(SECA2)	1.32638	2.56333	0.950952	0.00126189
AT1G21660	Chaperone DnaJ-domain superfamily protein	12.9369	20.7363	0.680403	0.0216397
AT1G21670	DPP6 amino-terminal domain protein	1.38474	14.4949	3.38887	7.40056e-10
AT1G21690	EMBRYO DEFECTIVE 1968 (emb1968)	7.65218	3.54029	-1.11175	0.000136873
AT1G21695	hydroxyproline-rich glycoprotein family protein	1.58231	0.577265	-1.45587	0.00458639
AT1G21730	KIN7.1; KINESIN 7.1	3.88388	1.51385	-1.35719	2.08076e-05
AT1G21740	DUF630 family protein%2C putative (DUF630 and DUF632)	7.32684	0.660208	-3.47491	1.53482e-16
AT1G21760	F-BOX PROTEIN 7 (FBP7)	3.15128	9.91409	1.65249	8.10358e-07
AT1G21780	BTB/POZ domain-containing protein	11.549	20.575	0.83287	0.00219307
AT1G21790	TRAM%2C LAG1 and CLN8 (TLC) lipid-sensing domain containing protein	3.69721	9.0122	1.28309	0.00140205
AT1G21840	UREASE ACCESSORY PROTEIN F (UREF)	4.88974	2.37309	-1.03786	0.0307895
AT1G21880	LYSM DOMAIN GPI-ANCHORED PROTEIN 1 PRECURSOR (LYM1)	17.3028	8.06673	-1.10187	0.000743416
AT1G21910	DEHYDRATION RESPONSE ELEMENT-BINDING PROTEIN 26 (DREB26)	20.6515	158.022	2.93574	9.52686e-13
AT1G21930	transmembrane protein	3.47338	9.38869	1.43416	0.000440936
AT1G21970	LEAFY COTYLEDON 1 (LEC1)	2.30922	0	-10.7118	4.17287e-20
AT1G21980	PHOSPHATIDYLINOSITOL-4-PHOSPHATE 5-KINASE 1 (PIP5K1)	73.024	11.3333	-2.68794	2.60251e-15
AT1G21990	F-box/RNI-like/FBD-like domains-containing protein	19.6543	0	-13.4271	8.3546e-59
AT1G22030	BPS1-like protein	14.3865	0.73011	-4.30407	1.1803e-24
AT1G22050	MEMBRANE-ANCHORED UBIQUITIN-FOLD PROTEIN 6 PRECURSOR (MUB6)	2.49517	6.23795	1.31978	0.000503733
AT1G22065	hypothetical protein	14.4946	0.809624	-4.14627	1.77246e-07
AT1G22140	zinc finger CCCH domain protein	16.2704	30.1638	0.889607	0.0107764
AT1G22160	senescence-associated family protein (DUF581)	0.945616	10.7867	3.50335	1.83988e-06
AT1G22170	Phosphoglycerate mutase family protein	6.2328	1.39783	-2.15833	6.04658e-08
AT1G22190	RAP2.4; RELATED TO AP2 4; WIND2	43.4482	291.685	2.74692	2.3497e-16
AT1G22220	AUXIN UP-REGULATED F-BOX PROTEIN 2 (AUF2)	21.696	1.06047	-4.35827	4.29773e-29
AT1G22270	Trm112p-like protein	33.8791	20.0091	-0.759808	0.00923297
AT1G22280	PHYTOCHROME-ASSOCIATED PROTEIN PHOSPHATASE TYPE 2C (PAPP2C)	37.4066	75.701	1.01714	0.00081439
AT1G22300	GENERAL REGULATORY FACTOR 10 (GRF10)	110.222	63.3509	-0.798956	0.00767977
AT1G22330	RNA-binding (RRM/RBD/RNP motifs) family protein	0.00453086	3.36056	9.48714	5.60826e-33
AT1G22340	UDP-GLUCOSYL TRANSFERASE 85A7 (UGT85A7)	0.00716056	1.06963	6.97498	5.59329e-17
AT1G22350		0.573071	8.83819	3.94429	4.41558e-09
AT1G22360	UDP-GLUCOSYL TRANSFERASE 85A2 (UGT85A2)	92.3278	13.157	-2.81026	5.49023e-08
AT1G22370	UDP-GLUCOSYL TRANSFERASE 85A5 (UGT85A5)	0.231408	2.90358	3.65251	2.68367e-10
AT1G22400	(UGT85A1)	13.3891	30.1118	1.16923	0.0282181
AT1G22430	GroES-like zinc-binding dehydrogenase family protein	0.0893382	21.137	7.88421	1.89339e-68
AT1G22440	Zinc-binding alcohol dehydrogenase family protein	19.3677	0.155911	-6.94344	1.25323e-66
AT1G22490	basic helix-loop-helix (bHLH) DNA-binding superfamily protein	1.59345	0.604033	-1.39309	0.00955105
AT1G22500	ARABIDOPSIS TOXICOS EN LEVADURA 15 (ATL15)	0.357207	5.02664	3.81219	1.88367e-07
AT1G22510	E3 ubiquitin-protein ligase RNF170-like protein (DUF 1232)	8.15192	18.9539	1.21777	5.54625e-05
AT1G22530	PATELLIN 2 (PATL2)	33.969	64.3284	0.921322	0.00716017
AT1G22550	Major facilitator superfamily protein	3.08444	1.36258	-1.1781	0.0105539
AT1G22570	Major facilitator superfamily protein	9.35183	58.5336	2.64558	6.0248e-09
AT1G22590	AGAMOUS-LIKE 87 (AGL87)	0.0280055	7.61198	8.18133	2.07584e-26
AT1G22630	SSUH2-like protein	0.0460125	75.9967	10.7944	5.7468e-71
AT1G22640	MYB DOMAIN PROTEIN 3 (MYB3)	14.4277	7.11296	-1.02209	0.00473194
AT1G22650	ALKALINE/NEUTRAL INVERTASE D (A/N-InvD)	0.655624	10.2348	3.95679	1.07859e-11
AT1G22660	Polynucleotide adenylyltransferase family protein	3.79149	1.77807	-1.09029	0.000808348
AT1G22690	Gibberellin-regulated family protein	0.153372	59.6223	8.59057	2.23335e-58
AT1G22700	Tetratricopeptide repeat (TPR)-like superfamily protein	6.31213	57.3509	3.18299	1.12482e-29
AT1G22710	SUCROSE-PROTON SYMPORTER 2 (SUC2)	0.446641	185.488	8.68715	1.41637e-20
AT1G22740	RAB GTPASE HOMOLOG G3B (RABG3B)	0.269877	8.08182	4.88904	1.8033e-10
AT1G22750	transmembrane protein	1.7376	29.3879	4.0817	6.17286e-26
AT1G22770	GIGANTEA (GI)	13.9419	3.85655	-1.85399	0.000134301
AT1G22780	POINTED FIRST LEAVES (PFL)	106.125	58.114	-0.869074	0.0131949
AT1G22800	S-adenosyl-L-methionine-dependent methyltransferases superfamily protein	7.74695	4.43724	-0.80422	0.00941981
AT1G22810	ATERF019; ERF019	0.0446087	35.3053	9.45495	5.87617e-43
AT1G22830	Tetratricopeptide repeat (TPR)-like superfamily protein	3.20302	5.56941	0.797007	0.0218044
AT1G22850	SNARE associated Golgi protein family	6.02205	110.292	4.19444	1.3004e-28
AT1G22870	kinase family with ARM repeat domain-containing protein	5.51457	10.2717	0.897385	0.000681866
AT1G22880	CELLULASE 5 (CEL5)	10.8053	6.37372	-0.76173	0.013191
AT1G22885	transmembrane protein	3.01677	23.1195	2.94013	1.51692e-11
AT1G22890	transmembrane protein	0.48192	131.13	8.09337	1.05289e-56
AT1G22910	RNA-binding (RRM/RBD/RNP motifs) family protein	2.43637	11.8031	2.27548	0.000140644
AT1G22930	T-complex protein 11	61.5903	133.693	1.11816	0.000458608
AT1G22940	THIAMINE REQUIRING 1 (TH1)	4.57182	11.413	1.31903	1.87789e-05
AT1G22950	2-oxoglutarate (2OG) and Fe(II)-dependent oxygenase superfamily protein	9.52089	4.20505	-1.18045	0.000127554
AT1G22960	Pentatricopeptide repeat (PPR) superfamily protein	7.9048	2.87804	-1.45701	1.06717e-05
AT1G22970	cyclin-D1-binding protein	12.1189	6.57466	-0.881485	0.00503393
AT1G22980	Grap2/cyclin-D-interacting protein	2.00819	0.209158	-3.24424	4.75013e-11
AT1G22985	CYTOKININ RESPONSE FACTOR 7 (CRF7)	36.9846	6.40058	-2.53004	7.22552e-07
AT1G22990	HEAVY METAL ASSOCIATED ISOPRENYLATED PLANT PROTEIN 22 (HIPP22)	5.06664	0.239475	-4.32604	2.07153e-07
AT1G23000	Heavy metal transport/detoxification superfamily protein	2.75016	0.776261	-1.82445	0.00675966
AT1G23010	LOW PHOSPHATE ROOT1 (LPR1)	2.60984	1.1874	-1.13818	0.00412808
AT1G23020	FERRIC REDUCTION OXIDASE 3 (FRO3)	4.63785	28.059	2.59769	1.07332e-07
AT1G23030	PLANT U-BOX PROTEIN 11; PUB11	9.80744	42.6636	2.12088	2.57082e-12
AT1G23040	hydroxyproline-rich glycoprotein family protein	29.163	9.23685	-1.65964	6.70085e-05
AT1G23080	PIN-FORMED 7 (PIN7)	95.5448	17.2921	-2.46574	7.3321e-10
AT1G23090	SULFATE TRANSPORTER 91 (AST91)	0.0121116	39.3861	11.6012	1.3662e-120
AT1G23100	GroES-like family protein	8.2855	2.61529	-1.65848	5.51989e-05
AT1G23120	Polyketide cyclase/dehydrase and lipid transport superfamily protein	12.7173	0.644669	-4.26054	1.2402e-14
AT1G23130	Polyketide cyclase/dehydrase and lipid transport superfamily protein	0.0397446	1384.85	15.2166	3.74408e-114
AT1G23160	Auxin-responsive GH3 family protein	7.45533	0.0164649	-8.67787	3.65849e-13
AT1G23170	transmembrane protein (Protein of unknown function DUF2359%2C transmembrane)	4.15249	1.8321	-1.1794	0.00105838
AT1G23180	ARM repeat superfamily protein	4.63412	11.4319	1.30239	6.80461e-06
AT1G23200	Plant invertase/pectin methylesterase inhibitor superfamily	0.0533887	2.36532	5.38507	3.32486e-12
AT1G23205	Plant invertase/pectin methylesterase inhibitor superfamily protein	0.066109	14.2203	7.67158	2.21163e-18
AT1G23280	MAK16 protein-like protein	22.5982	8.12678	-1.47714	9.08588e-06
AT1G23290	(RPL27AB)	455.214	196.179	-1.21453	0.000213997
AT1G23310	GLUTAMATE:GLYOXYLATE AMINOTRANSFERASE (GGT1)	18.0292	1454.4	6.33389	2.02682e-61
AT1G23330	alpha/beta-Hydrolases superfamily protein	3.87157	9.78612	1.33695	0.000396789
AT1G23360	(MENG)	5.29619	16.1006	1.60366	6.67756e-07
AT1G23380	KNOTTED1-LIKE HOMEOBOX GENE 6 (KNAT6)	4.95383	0.0885615	-5.83293	6.57115e-47
AT1G23390	Kelch repeat-containing F-box family protein	25.7259	101.676	1.9826	2.03687e-10
AT1G23400	(CAF2)	4.51231	26.2073	2.53847	1.50745e-19
AT1G23410	Ribosomal protein S27a / Ubiquitin family protein	64.7306	1.70469	-5.26115	9.59897e-17
AT1G23440	Peptidase C15%2C pyroglutamyl peptidase I-like protein	41.2322	22.0956	-0.899662	0.00857076
AT1G23450	PPR superfamily protein	4.84323	0.603032	-3.00135	1.92734e-07
AT1G23480	CELLULOSE SYNTHASE-LIKE A3 (CSLA03)	1.75239	12.4879	2.83337	2.0832e-10
AT1G23490	ADP-RIBOSYLATION FACTOR 1 (ARF1)	65.4979	194.263	1.56852	3.48e-07
AT1G23530	transmembrane protein	0.196611	3.94594	4.27463	3.11812e-10
AT1G23560	OBP32pep%2C putative (DUF220)	7.64059	0.206234	-5.23023	7.87812e-19
AT1G23710	hypothetical protein (DUF1645)	11.8509	226.278	4.25519	1.16492e-28
AT1G23720	Proline-rich extensin-like family protein	2.84338	0.00420407	-9.11795	3.93401e-17
AT1G23730	BETA CARBONIC ANHYDRASE 3 (BCA3)	0.521757	2.33951	2.1645	6.7615e-06
AT1G23740	ALKENAL/ONE OXIDOREDUCTASE (AOR)	0.727163	228.051	8.2913	7.24958e-44
AT1G23760	(JP630)	7.77811	0.496513	-3.97248	4.58035e-05
AT1G23780	F-box family protein	33.7838	18.3665	-0.879283	0.00152516
AT1G23790	dicer-like protein (DUF936)	2.28682	0.391274	-2.54931	4.41779e-06
AT1G23800	ALDEHYDE DEHYDROGENASE 2B7 (ALDH2B7)	23.0964	1.94511	-3.5697	9.8548e-14
AT1G23830	transmembrane protein	4.64572	8.18516	0.815459	0.0399472
AT1G23840	transmembrane protein	1.18957	11.7641	3.29839	6.14097e-07
AT1G23860	RS-CONTAINING ZINC FINGER PROTEIN 21 (RSZ21)	21.6531	11.3461	-0.93267	0.000989737
AT1G23870	TREHALOSE-PHOSPHATASE/SYNTHASE 9 (TPS9)	20.7302	42.0427	1.02007	0.00288648
AT1G23890	NHL domain-containing protein	8.93728	1.79403	-2.31925	1.61125e-11
AT1G23950	hypothetical protein (DUF626)	16.2865	9.75945	-0.73863	0.0127011
AT1G24020	MLP-LIKE PROTEIN 423 (MLP423)	0	4.40178	11.3469	1.91521e-22
AT1G24040	Acyl-CoA N-acyltransferases (NAT) superfamily protein	3.24569	9.11298	1.48808	3.67362e-06
AT1G24095	Putative thiol-disulfide oxidoreductase DCC	14.7778	1.02691	-3.83383	3.47729e-15
AT1G24100	UDP-GLUCOSYL TRANSFERASE 74B1 (UGT74B1)	35.4855	101.207	1.5119	1.20624e-05
AT1G24120	ARG1-LIKE 1 (ARL1)	5.863	9.66506	0.720763	0.0111015
AT1G24140	Matrixin family protein	1.37635	84.2471	5.93841	3.00268e-57
AT1G24145	transmembrane protein	0.192727	93.6852	8.89948	7.94644e-80
AT1G24147	transmembrane protein	0.42388	106.514	7.94256	5.88335e-69
AT1G24148	hypothetical protein	0.00767635	18.6101	10.7889	4.9245e-53
AT1G24150	FORMIN HOMOLOGUE 4 (FH4)	6.82198	45.639	2.74262	5.54448e-16
AT1G24160	triadin	6.88741	21.5376	1.64443	1.54945e-09
AT1G24170	(LGT9)	16.4973	82.9104	2.32946	2.95237e-14
AT1G24180	IAA-CONJUGATE-RESISTANT 4 (IAR4)	43.4172	27.424	-0.662804	0.0353676
AT1G24210	Paired amphipathic helix (PAH2) superfamily protein	1.03455	0.502929	-1.03675	0.0395421
AT1G24240	Ribosomal protein L19 family protein	5.82275	2.9955	-0.957977	0.0079298
AT1G24265	bZIP transcription factor%2C putative (DUF1664)	1.36719	0.230159	-2.55625	4.12628e-08
AT1G24280	GLUCOSE-6-PHOSPHATE DEHYDROGENASE 3 (G6PD3)	5.81071	2.95267	-0.977223	0.00251803
AT1G24310	NUP54	13.5758	5.22569	-1.37859	4.08641e-06
AT1G24320	Six-hairpin glycosidases superfamily protein	4.37618	0.0306567	-7.0873	2.06826e-11
AT1G24330	ARM repeat superfamily protein	0.791168	23.1397	4.86607	1.74796e-41
AT1G24340	EMBRYO DEFECTIVE 2421 (emb2421)	4.77388	9.90594	1.05242	0.000505052
AT1G24400	LYSINE HISTIDINE TRANSPORTER 2 (LHT2)	0	2.5278	11.0881	1.77388e-25
AT1G24430	HXXXD-type acyl-transferase family protein	2.08274	0	-10.1237	4.63978e-20
AT1G24450	NUCLEAR FUSION DEFECTIVE 2 (NFD2)	11.5891	6.66824	-0.795768	0.0323793
AT1G24470	BETA-KETOACYL REDUCTASE 2 (KCR2)	0.017952	1.82703	6.67585	8.28819e-24
AT1G24510	TCP-1/cpn60 chaperonin family protein	72.3605	33.8346	-1.09676	0.000228416
AT1G24530	Transducin/WD40 repeat-like superfamily protein	9.92121	20.0121	1.01276	0.0300398
AT1G24560	paramyosin	19.6947	12.3973	-0.667434	0.0160295
AT1G24575	DEAD-box ATP-dependent RNA helicase-like protein	1.44967	25.0936	4.10206	0.000343128
AT1G24580	RING/U-box superfamily protein	1.97674	15.9183	3.00341	2.58427e-05
AT1G24610	Rubisco methyltransferase family protein	8.49276	20.0154	1.23621	3.44273e-05
AT1G24625	ZINC FINGER PROTEIN 7 (ZFP7)	10.3559	5.00119	-1.04861	0.00297067
AT1G24764	MICROTUBULE-ASSOCIATED PROTEINS 70-2 (MAP70-2)	15.3499	5.99687	-1.35587	9.59267e-07
AT1G24800	F-box family protein	24.4339	11.4263	-1.09633	3.23276e-05
AT1G24880	LIPID X C2 (LPXC2)	5.71922	3.49424	-0.710654	0.0127197
AT1G24881	F-box family protein	24.3669	11.6311	-1.06661	6.18602e-05
AT1G24996	hypothetical protein	84.8594	55.4503	-0.613627	0.0392449
AT1G25054	LIPID X C3 (LPXC3)	5.74683	3.4272	-0.745127	0.00985333
AT1G25055	F-box family protein	24.85	12.2822	-1.01665	0.000132012
AT1G25098		30.2775	18.5299	-0.707998	0.00894623
AT1G25145	LIPID X C4 (LPXC4)	6.68195	3.96189	-0.753266	0.0414764
AT1G25150	F-box family protein	25.4928	11.5803	-1.1381	1.89987e-05
AT1G25175		50.0606	31.0661	-0.688083	0.0280136
AT1G25210	LIPID X C5 (LPXC5)	6.06003	3.34187	-0.857694	0.0200636
AT1G25211	F-box family protein	24.5106	12.0392	-1.02564	9.1356e-05
AT1G25230	Calcineurin-like metallo-phosphoesterase superfamily protein	2.04355	11.1416	2.44516	8.32417e-06
AT1G25250	INDETERMINATE(ID)-DOMAIN 16 (IDD16)	0.023594	1.83612	6.11061	1.69845e-13
AT1G25260	Ribosomal protein L10 family protein	50.822	19.4182	-1.3888	0.000150997
AT1G25275	thionin-like protein	710.16	155.875	-2.18751	5.12832e-06
AT1G25280	TUBBY LIKE PROTEIN 10 (TLP10)	33.0414	20.0305	-0.722055	0.0134209
AT1G25290	RHOMBOID-LIKE PROTEIN 10 (RBL10)	1.90274	5.56236	1.54452	0.000250153
AT1G25320	Leucine-rich repeat protein kinase family protein	25.9383	1.32083	-4.28937	6.73719e-17
AT1G25360	Pentatricopeptide repeat (PPR) superfamily protein	1.28227	0.589461	-1.11334	0.0143885
AT1G25390	LEAF RUST 10 DISEASE-RESISTANCE LOCUS RECEPTOR- LIKE PROTEIN KINASE-LIKE 4; LRK10L4	6.48162	30.9616	2.25548	4.77969e-17
AT1G25400	transmembrane protein	16.6933	107.466	2.68665	1.74354e-11
AT1G25420	IST1-LIKE 2; ISTL2	12.8864	19.7158	0.613043	0.024181
AT1G25425	CLAVATA3/ESR-RELATED 43 (CLE43)	0.20645	4.42445	4.41166	1.66868e-11
AT1G25440	B-box type zinc finger protein with CCT domain-containing protein	1.28378	181.071	7.13546	4.99043e-18
AT1G25450	3-KETOACYL-COA SYNTHASE 5 (KCS5)	2.68812	7.72935	1.52094	0.00177823
AT1G25460	NAD(P)-binding Rossmann-fold superfamily protein	3.73085	0.0396726	-6.4383	8.2557e-18
AT1G25510	Eukaryotic aspartyl protease family protein	17.1244	1.09205	-3.97335	1.82435e-11
AT1G25520	Uncharacterized protein family (UPF0016)	3.75418	11.9941	1.67497	1.39572e-07
AT1G25530	Transmembrane amino acid transporter family protein	14.4344	2.29865	-2.6507	2.35477e-05
AT1G25550	myb-like transcription factor family protein	36.4354	130.288	1.83826	2.3339e-08
AT1G25560	TEMPRANILLO 1 (TEM1)	32.4545	54.6977	0.753036	0.00880488
AT1G25570	Di-glucose binding protein with Leucine-rich repeat domain-containing protein	21.0839	11.398	-0.887135	0.00219424
AT1G25580	SUPPRESSOR OF GAMMA RADIATION 1 (SOG1)	8.90638	4.53495	-0.972624	0.00268301
AT1G25682	CWC16A	9.73	30.1342	1.63097	2.41773e-09
AT1G25988	coiled-coil protein%2C putative (DUF572)	1.14711	3.75426	1.7101	0.000124802
AT1G26090	P-loop containing nucleoside triphosphate hydrolases superfamily protein	2.17936	8.57255	1.97399	1.54635e-08
AT1G26120	ISOPRENYLCYSTEINE METHYLESTERASE-LIKE 1 (ICME-LIKE1)	3.79955	6.98547	0.878637	0.00595957
AT1G26130	ATPase E1-E2 type family protein / haloacid dehalogenase-like hydrolase family protein	2.27992	4.7296	1.05272	0.0019692
AT1G26150	PROLINE-RICH EXTENSIN-LIKE RECEPTOR KINASE 10 (PERK10)	16.1266	47.9928	1.57314	1.03973e-06
AT1G26160	Metal-dependent phosphohydrolase	6.15241	10.2351	0.733723	0.0145308
AT1G26170	ARM repeat superfamily protein	5.55661	3.49537	-0.668837	0.0126701
AT1G26180	membrane protein	2.82114	12.5509	2.15199	1.8273e-10
AT1G26190	Phosphoribulokinase / Uridine kinase family	8.16607	1.81276	-2.16957	1.20251e-12
AT1G26210	SOB FIVE-LIKE 1 (SOFL1)	0.220696	3.07607	3.8011	3.17775e-09
AT1G26218	SHORT OPEN READING FRAME 14; SORF14	0.644996	1.33272	1.04194	0.0360733
AT1G26230	CHAPERONIN-60BETA4 (CPN60BETA4)	0.300147	6.35406	4.41169	8.30666e-17
AT1G26260	CRYPTOCHROME-INTERACTING BASIC-HELIX-LOOP-HELIX 5 (CIB5)	5.58548	2.04448	-1.44802	0.00022724
AT1G26270	Phosphatidylinositol 3- and 4-kinase family protein	59.9914	27.2745	-1.13743	0.00213708
AT1G26300	BSD domain-containing protein	7.33898	3.09074	-1.24571	0.000101719
AT1G26330	DNA binding protein	1.61223	0.311843	-2.3751	5.42037e-09
AT1G26340	CYTOCHROME B5 ISOFORM A (CB5-A)	15.8871	9.15827	-0.794662	0.0181155
AT1G26370	RNA helicase family protein	9.43718	4.33278	-1.12402	8.8816e-05
AT1G26420	FAD-binding Berberine family protein	0.488419	8.3365	4.09249	2.66649e-05
AT1G26440	UREIDE PERMEASE 5 (UPS5)	13.2946	7.68466	-0.788995	0.0495022
AT1G26460	Tetratricopeptide repeat (TPR)-like superfamily protein	21.3104	9.65358	-1.14202	1.247e-05
AT1G26470	SNRK2-SUBSTRATE 1; SNS1	21.1941	10.7807	-0.976834	0.0030437
AT1G26520	Cobalamin biosynthesis CobW-like protein	3.64028	1.2987	-1.4865	5.29132e-05
AT1G26540	Agenet domain-containing protein	2.49471	0.326822	-2.93503	1.18706e-09
AT1G26560	BETA GLUCOSIDASE 40 (BGLU40)	0.502131	32.5471	6.02178	2.38116e-14
AT1G26570	UDP-GLUCOSE DEHYDROGENASE 1 (UGD1)	0.729099	5.89324	3.01748	4.66381e-07
AT1G26620	T-box transcription factor%2C putative (DUF863)	11.27	3.92262	-1.52094	3.01006e-07
AT1G26650	Son of sevenless protein	7.44088	12.7956	0.780806	0.0294775
AT1G26660	Prefoldin chaperone subunit family protein	3.78381	2.05924	-0.876683	0.0179673
AT1G26665	Mediator complex%2C subunit Med10	23.8531	10.2901	-1.21145	0.00132721
AT1G26670	(VTI1B)	22.7443	41.2747	0.86006	0.00470805
AT1G26690	emp24/gp25L/p24 family/GOLD family protein	10.0292	17.2487	0.783068	0.0250657
AT1G26720	transmembrane protein	2.09011	0.0237901	-6.16906	9.31194e-09
AT1G26740	Ribosomal L32p protein family	12.4332	6.38553	-0.9598	0.00198107
AT1G26760	SET DOMAIN PROTEIN 35 (SDG35)	3.00565	0.469824	-2.68432	4.00223e-06
AT1G26761	Arabinanase/levansucrase/invertase	0.0517643	20.7979	8.50751	1.63486e-31
AT1G26770	EXPANSIN A10 (EXPA10)	27.0406	11.2011	-1.27163	0.000201823
AT1G26800	RING/U-box superfamily protein	7.08442	23.5191	1.73029	0.00157374
AT1G26810	GALACTOSYLTRANSFERASE1 (GALT1)	1.3332	2.5808	0.950878	0.0194029
AT1G26840	ORIGIN RECOGNITION COMPLEX PROTEIN 6 (ORC6)	2.04286	0.729985	-1.4801	0.00132733
AT1G26870	FEZ (FEZ)	2.13692	0.0162018	-6.89153	6.57359e-17
AT1G26880	Ribosomal protein L34e superfamily protein	79.5039	49.1708	-0.69358	0.0412459
AT1G26900	Pentatricopeptide repeat (PPR) superfamily protein	3.87509	1.99553	-0.953045	0.0223583
AT1G26910	RIBOSOMAL PROTEIN L10 B (RPL10B)	22.0541	5.9118	-1.90176	2.88564e-08
AT1G26930	Galactose oxidase/kelch repeat superfamily protein	69.9503	2.08437	-5.05912	4.56657e-23
AT1G26960	HOMEOBOX PROTEIN 23 (AtHB23)	1.93008	7.34919	1.92816	5.49171e-05
AT1G27020	plant/protein	1.94757	19.0904	3.29237	3.80455e-10
AT1G27030	hypothetical protein	0.827397	5.45017	2.71198	1.78448e-07
AT1G27050	homeobox leucine zipper protein	16.7044	7.75092	-1.10942	0.00212112
AT1G27060	Regulator of chromosome condensation (RCC1) family protein	1.73888	4.74148	1.44357	0.000905488
AT1G27100	Actin cross-linking protein	11.1127	145.017	3.70591	4.22712e-26
AT1G27120	Galactosyltransferase family protein	1.30417	6.1654	2.23843	5.98046e-06
AT1G27130	GLUTATHIONE S-TRANSFERASE TAU 13 (GSTU13)	34.7807	85.3702	1.29529	5.81948e-05
AT1G27140	GLUTATHIONE S-TRANSFERASE TAU 14 (GSTU14)	5.07705	0.028249	-7.34806	1.84502e-12
AT1G27150	Tetratricopeptide repeat (TPR)-like superfamily protein	8.16932	5.05669	-0.691192	0.0190388
AT1G27180	disease resistance protein (TIR-NBS-LRR class)	0.771055	1.6196	1.06908	0.00636045
AT1G27200	glycosyltransferase family protein (DUF23)	9.53962	35.8995	1.91133	2.70162e-11
AT1G27290	transmembrane protein	36.1774	137.343	1.92445	1.07222e-09
AT1G27300	transmembrane protein	45.2133	15.7792	-1.51764	1.75411e-07
AT1G27320	HISTIDINE KINASE 3 (HK3)	20.9177	40.8206	0.964502	0.00113928
AT1G27330	Ribosome associated membrane protein RAMP4	36.138	59.3161	0.71522	0.0150407
AT1G27360	SQUAMOSA PROMOTER-LIKE 11 (SPL11)	1.67564	7.38208	2.13817	1.28653e-07
AT1G27385	phosphoribosylformylglycinamidine synthase	3.69443	15.4421	2.06385	2.68047e-11
AT1G27390	TRANSLOCASE OUTER MEMBRANE 20-2 (TOM20-2)	33.8906	13.0947	-1.37256	3.82633e-07
AT1G27400	Ribosomal protein L22p/L17e family protein	97.4048	41.612	-1.22727	0.000175155
AT1G27470	transducin family protein / WD-40 repeat family protein	14.2851	4.011	-1.83372	2.7628e-10
AT1G27480	alpha/beta-Hydrolases superfamily protein	0.00382643	40.681	13.0785	7.29188e-83
AT1G27500	Tetratricopeptide repeat (TPR)-like superfamily protein	7.61178	2.86206	-1.41098	5.194e-05
AT1G27510	EXECUTER 2 (EX2)	9.90668	25.6604	1.3728	5.4692e-07
AT1G27565	hypothetical protein	6.72591	2.8234	-1.25923	0.00821597
AT1G27590		10.9007	5.15768	-1.07982	0.000127619
AT1G27620	HXXXD-type acyl-transferase family protein	4.08674	0.161588	-4.68257	5.15608e-13
AT1G27630	CYCLIN T 1;3 (CYCT1;3)	9.08463	2.59826	-1.80177	2.17595e-06
AT1G27650	(ATU2AF35A)	58.3009	29.5938	-0.978232	0.000772023
AT1G27660	basic helix-loop-helix (bHLH) DNA-binding superfamily protein	0.0095245	2.02018	7.72716	1.47593e-23
AT1G27680	ADPGLC-PPASE LARGE SUBUNIT (APL2)	5.62357	3.57783	-0.652081	0.0388697
AT1G27690	lipase%2C putative (DUF620)	17.3016	6.20967	-1.47718	1.75316e-06
AT1G27700	Syntaxin/t-SNARE family protein	3.74991	9.26799	1.30476	0.000353193
AT1G27730	SALT TOLERANCE ZINC FINGER (STZ)	38.0354	863.353	4.50425	3.08259e-21
AT1G27770	AUTOINHIBITED CA2+-ATPASE 1 (ACA1)	21.3257	300.965	3.81892	5.90524e-30
AT1G27880	DEAD/DEAH box RNA helicase family protein	1.64059	0.248205	-2.73336	5.55314e-09
AT1G27890	Polynucleotidyl transferase%2C ribonuclease H-like superfamily protein	2.34784	0.304851	-2.89498	8.16005e-06
AT1G27900	RNA helicase family protein	6.38463	4.10398	-0.637836	0.0249928
AT1G27910	PLANT U-BOX 45 (PUB45)	3.12287	7.01453	1.16692	0.000423675
AT1G27940	ATP-BINDING CASSETTE B13 (ABCB13)	0.02424	1.57568	5.98754	2.81304e-13
AT1G27950	GLYCOSYLPHOSPHATIDYLINOSITOL-ANCHORED LIPID PROTEIN TRANSFER 1 (LTPG1)	55.3459	124.655	1.17118	0.00482098
AT1G27960	EVOLUTIONARILY CONSERVED C-TERMINAL REGION 9 (ECT9)	3.7886	1.83736	-1.04556	0.00483595
AT1G27970	NUCLEAR TRANSPORT FACTOR 2B (NTF2B)	43.3789	67.9192	0.646831	0.0395911
AT1G27980	DIHYDROSPHINGOSINE PHOSPHATE LYASE (DPL1)	9.74688	5.94404	-0.712691	0.0109436
AT1G28010	ATP-BINDING CASSETTE B14 (ABCB14)	0.448893	3.34259	2.89021	6.94629e-06
AT1G28060	Pre-mRNA-splicing factor 3	19.8981	10.8353	-0.877214	0.00152647
AT1G28100	hypothetical protein	0.525268	1.62068	1.62526	0.000782025
AT1G28110	SERINE CARBOXYPEPTIDASE-LIKE 45 (SCPL45)	12.0899	4.13235	-1.54935	6.65676e-07
AT1G28130	(GH3.17)	53.3697	0.962793	-5.79565	2.63635e-17
AT1G28140	integral membrane family protein	5.06686	58.2379	3.52198	1.6697e-32
AT1G28150	hypothetical protein	5.06045	26.7847	2.40233	1.00278e-11
AT1G28210	(ATJ1)	1.11641	0.476443	-1.22361	0.00384439
AT1G28240	strawberry notch protein (DUF616)	9.21818	19.4691	1.07891	0.000142639
AT1G28260	Telomerase activating protein Est1	17.5959	5.14896	-1.77124	1.34636e-06
AT1G28290	ARABINOGALACTAN PROTEIN 31 (AGP31)	171.083	6.43377	-4.73421	1.16469e-29
AT1G28360	ERF DOMAIN PROTEIN 12 (ERF12)	10.5262	0.365997	-4.84665	1.1886e-21
AT1G28370	ERF DOMAIN PROTEIN 11 (ERF11)	9.80713	195.184	4.31359	1.22146e-38
AT1G28380	NECROTIC SPOTTED LESIONS 1 (NSL1)	15.5047	207.875	3.74494	2.52148e-26
AT1G28390	Protein kinase superfamily protein	9.88222	1.4334	-2.78634	1.2257e-12
AT1G28400	GATA zinc finger protein	174.59	45.1239	-1.95203	9.26348e-07
AT1G28440	HAESA-LIKE 1 (HSL1)	11.2556	21.5885	0.939303	0.00308082
AT1G28480	(GRX480)	19.4204	185.781	3.25854	4.55106e-14
AT1G28510	Optic atrophy 3 protein (OPA3)	6.34671	9.91145	0.643454	0.0465291
AT1G28520	VASCULAR PLANT ONE ZINC FINGER PROTEIN (VOZ1)	32.8623	19.4401	-0.757249	0.0121759
AT1G28570	SGNH hydrolase-type esterase superfamily protein	0.680941	3.69264	2.43172	4.46953e-05
AT1G28580	GDSL-like Lipase/Acylhydrolase superfamily protein	67.4475	23.1488	-1.54227	2.71061e-06
AT1G28600	GDSL-like Lipase/Acylhydrolase superfamily protein	6.38697	83.702	3.71227	2.71527e-24
AT1G28610	GDSL-like Lipase/Acylhydrolase superfamily protein	0.0124159	5.33748	8.55772	2.45227e-31
AT1G28620		3.69038	0.404075	-3.18468	7.36048e-07
AT1G28660	GDSL-like Lipase/Acylhydrolase superfamily protein	0.661967	5.47743	3.03913	2.15624e-06
AT1G28670	(ARAB-1)	2.07505	11.7299	2.49917	3.61892e-09
AT1G28680	HXXXD-type acyl-transferase family protein	6.6863	2.1061	-1.66673	0.000147592
AT1G28710	Nucleotide-diphospho-sugar transferase family protein	1.46894	3.17165	1.10877	0.00451546
AT1G28760	INNER NUCLEAR MEMBRANE PROTEIN A; NEMP_A	7.27162	3.03802	-1.26206	0.00146569
AT1G29020	Calcium-binding EF-hand family protein	10.1404	0	-13.0821	2.55313e-14
AT1G29030	Apoptosis inhibitory protein 5 (API5)	4.8305	1.10616	-2.12588	1.03179e-10
AT1G29040	50S ribosomal protein L34	7.08339	11.4101	0.687275	0.0233728
AT1G29050	TRICHOME BIREFRINGENCE-LIKE 38 (TBL38)	2.7257	6.34029	1.21638	0.0077986
AT1G29070	Ribosomal protein L34	5.52349	235.222	5.41101	7.89108e-47
AT1G29100	Heavy metal transport/detoxification superfamily protein	3.31247	0	-9.30709	7.39997e-10
AT1G29120	UP9	5.64722	9.2823	0.716673	0.0205881
AT1G29160	Dof-type zinc finger DNA-binding family protein	26.9217	5.0198	-2.42746	6.86302e-09
AT1G29195	phosphatidylinositol 4-phosphate 5-kinase MSS4-like protein	6.67334	0.475436	-3.78816	5.18377e-14
AT1G29250	Alba DNA/RNA-binding protein	24.3308	12.6082	-0.949578	0.00148969
AT1G29260	PEROXIN 7 (PEX7)	14.4627	23.099	0.674996	0.0207751
AT1G29280	WRKY DNA-BINDING PROTEIN 65 (WRKY65)	31.0637	0.573685	-5.72995	3.66356e-37
AT1G29290	B-cell lymphoma 6 protein	41.3345	13.6709	-1.59325	0.00078974
AT1G29300	UNFERTILIZED EMBRYO SAC 1 (UNE1)	17.992	3.54187	-2.34073	5.52407e-14
AT1G29310	SecY protein transport family protein	27.6857	12.2842	-1.17132	0.000658497
AT1G29320	Transducin/WD40 repeat-like superfamily protein	10.6826	3.02033	-1.82468	1.46881e-08
AT1G29340	PLANT U-BOX 17 (PUB17)	24.8119	158.849	2.67856	6.66447e-17
AT1G29350	RNA polymerase II degradation factor-like protein (DUF1296)	27.4986	14.4708	-0.926045	0.00200932
AT1G29357		5.9875	2.71922	-1.13336	0.0128628
AT1G29370	RNA polymerase II degradation factor-like protein (DUF1296)	27.4041	14.3355	-0.934626	0.00181158
AT1G29380	Carbohydrate-binding X8 domain superfamily protein	0.386458	2.63266	2.75751	3.39274e-08
AT1G29390	COLD REGULATED 314 THYLAKOID MEMBRANE 2 (COR314-TM2)	4.21634	30.6704	2.86168	1.07904e-20
AT1G29395	COLD REGULATED 314 INNER MEMBRANE 1 (COR413IM1)	0.100028	27.0009	8.04959	2.18072e-28
AT1G29410	PHOSPHORIBOSYLANTHRANILATE ISOMERASE 3 (PAI3)	5.44956	2.57935	-1.07815	0.00197654
AT1G29418	transmembrane protein	56.8322	13.3826	-2.08852	3.86654e-07
AT1G29430	SAUR62; SMALL AUXIN UPREGULATED RNA 62	0	9.73847	11.2119	8.56573e-22
AT1G29440	SMALL AUXIN UP RNA 63 (SAUR63)	0.0336283	9.70409	7.9036	3.63288e-21
AT1G29450	SAUR64; SMALL AUXIN UPREGULATED RNA 64	0	8.26587	10.6549	3.59042e-21
AT1G29460	SAUR65; SMALL AUXIN UPREGULATED RNA 65	0	5.53696	10.2904	1.07388e-20
AT1G29520	AWPM-19-like family protein	0.715644	14.5549	4.3324	2.07617e-09
AT1G29530	hypothetical protein	3.30342	16.9263	2.35582	3.07156e-09
AT1G29600	Zinc finger C-x8-C-x5-C-x3-H type family protein	0.0215496	2.03327	6.54673	1.30813e-17
AT1G29630	5'-3' exonuclease family protein	4.32698	0.719879	-2.58569	1.81797e-14
AT1G29640	senescence regulator (Protein of unknown function%2C DUF584)	12.7681	2.48498	-2.369	3.37834e-06
AT1G29660	GDSL-like Lipase/Acylhydrolase superfamily protein	0.450933	145.833	8.32478	5.57831e-17
AT1G29670	GDSL-like Lipase/Acylhydrolase superfamily protein	0.158123	91.2006	9.12941	2.05913e-56
AT1G29690	CONSTITUTIVELY ACTIVATED CELL DEATH 1 (CAD1)	10.756	89.0227	3.04901	8.65426e-22
AT1G29700	Metallo-hydrolase/oxidoreductase superfamily protein	2.01128	46.646	4.5358	3.04277e-46
AT1G29715		0.00834675	2.17373	7.91411	1.09489e-12
AT1G29720	Leucine-rich repeat transmembrane protein kinase	0.0115865	36.371	11.6203	4.21548e-52
AT1G29770	Haloacid dehalogenase-like hydrolase (HAD) superfamily protein	2.74998	1.208	-1.17534	0.0155035
AT1G29780	Haloacid dehalogenase-like hydrolase (HAD) superfamily protein	2.37618	0.620472	-1.90102	0.00137069
AT1G29830	Magnesium transporter CorA-like family protein	1.1346	0.147694	-2.94328	9.07997e-10
AT1G29840	alpha/beta-Hydrolases superfamily protein	2.11599	4.24832	1.00354	0.0134197
AT1G29860	WRKY DNA-BINDING PROTEIN 71 (WRKY71)	1.54695	0.196203	-2.90754	3.40194e-05
AT1G29890	REDUCED WALL ACETYLATION 4 (RWA4)	4.40866	8.4283	0.934132	0.0020522
AT1G29910	CHLOROPHYLL A/B BINDING PROTEIN 3 (CAB3)	2.42354	3988.12	10.6824	1.11277e-27
AT1G29920	CHLOROPHYLL A/B-BINDING PROTEIN 2 (CAB2)	10.5385	9828.97	9.86468	4.03849e-15
AT1G29930	CHLOROPHYLL A/B BINDING PROTEIN 1 (CAB1)	106.916	23374.3	7.77223	1.01194e-12
AT1G29940	NUCLEAR RNA POLYMERASE A2 (NRPA2)	15.4374	4.33196	-1.83392	3.60198e-08
AT1G29950	SACL3	3.58105	1.3255	-1.43422	0.000200526
AT1G29970	60S RIBOSOMAL PROTEIN L18A-1 (RPL18AA)	9.9908	15.8411	0.665156	0.0201182
AT1G29980	choice-of-anchor C domain protein%2C putative (Protein of unknown function%2C DUF642)	26.2297	5.32467	-2.30047	1.34604e-09
AT1G30040	GIBBERELLIN 2-OXIDASE (GA2OX2)	26.0969	10.1928	-1.35568	1.6463e-05
AT1G30080	Glycosyl hydrolase superfamily protein	2.7845	0.0106945	-7.88313	2.48434e-15
AT1G30090	Galactose oxidase/kelch repeat superfamily protein	28.5192	13.1601	-1.11509	3.77898e-05
AT1G30100	NINE-CIS-EPOXYCAROTENOID DIOXYGENASE 5 (NCED5)	6.81819	0.242072	-4.80153	2.27774e-10
AT1G30110	NUDIX HYDROLASE HOMOLOG 25 (NUDX25)	6.00081	2.5201	-1.25444	0.00116059
AT1G30120	PYRUVATE DEHYDROGENASE E1 BETA (PDH-E1 BETA)	18.7765	54.1421	1.52756	1.0931e-07
AT1G30135	JASMONATE-ZIM-DOMAIN PROTEIN 8 (JAZ8)	3.59445	53.1994	3.89138	5.3713e-17
AT1G30160	hypothetical protein (DUF295)	2.99725	0.692538	-2.12162	0.000818898
AT1G30190	cotton fiber protein	1.19223	13.8895	3.53431	8.28166e-12
AT1G30230	EUKARYOTIC ELONGATION FACTOR 1B BETA 1 (EEF-1BB1)	287.5	167.033	-0.783455	0.0119154
AT1G30250	hypothetical protein	0.0480212	83.2446	10.766	1.9366e-61
AT1G30260	galactosyltransferase family protein	1.36112	60.8289	5.47158	6.21739e-35
AT1G30270	CBL-INTERACTING PROTEIN KINASE 23 (CIPK23)	29.7295	5.19467	-2.51574	3.55933e-16
AT1G30280	Chaperone DnaJ-domain superfamily protein	0.101142	2.73712	4.72575	1.94072e-11
AT1G30330	AUXIN RESPONSE FACTOR 6 (ARF6)	20.0505	8.20637	-1.28811	1.74671e-05
AT1G30360	EARLY-RESPONSIVE TO DEHYDRATION 4 (ERD4)	18.1015	304.749	4.07324	1.15937e-30
AT1G30370	DAD1-LIKE ACYLHYDROLASE (DLAH)	0.536217	7.31491	3.76461	4.87923e-14
AT1G30380	PHOTOSYSTEM I SUBUNIT K (PSAK)	3.21973	1816.66	9.13732	4.2773e-23
AT1G30410	ATP-BINDING CASSETTE C12 (ABCC12)	1.29462	8.89802	2.7807	1.49315e-14
AT1G30420	ATP-BINDING CASSETTE C11 (ABCC11)	17.1845	4.66236	-1.88105	2.04784e-07
AT1G30440	Phototropic-responsive NPH3 family protein	29.4776	17.9133	-0.718782	0.0281704
AT1G30450	CATION-CHLORIDE CO-TRANSPORTER 1 (CCC1)	9.17112	5.14999	-0.831748	0.00470403
AT1G30460	CLEAVAGE AND POLYADENYLATION SPECIFICITY FACTOR 30 (CPSF30)	6.85347	3.98583	-0.781144	0.00517843
AT1G30475	hypothetical protein	2.5724	0.835626	-1.61319	0.000469354
AT1G30490	PHAVOLUTA (PHV)	51.7412	7.23293	-2.83848	9.67313e-18
AT1G30510	ROOT FNR 2 (RFNR2)	26.7765	6.67787	-2.00428	7.90332e-14
AT1G30520	ACYL-ACTIVATING ENZYME 14 (AAE14)	0.100939	14.9627	7.17416	2.13707e-49
AT1G30530	UDP-GLUCOSYL TRANSFERASE 78D1 (UGT78D1)	0.296291	44.551	7.21497	7.39948e-19
AT1G30540	Actin-like ATPase superfamily protein	2.63016	5.90028	1.16669	0.00138546
AT1G30600	Subtilase family protein	6.6146	1.7319	-1.93567	1.28701e-08
AT1G30610	EMBRYO DEFECTIVE 2279 (emb2279)	2.51166	5.27516	1.07049	0.000865662
AT1G30630	Coatomer epsilon subunit	63.5133	37.6342	-0.754866	0.0155525
AT1G30640	Protein kinase family protein	4.92778	8.18145	0.731867	0.0350352
AT1G30650	WRKY DNA-BINDING PROTEIN 14 (WRKY14)	3.27474	0	-11.767	9.17386e-40
AT1G30660	nucleic acid binding protein	3.73085	0.0327373	-6.765	2.32298e-21
AT1G30700	FAD-binding Berberine family protein	41.9317	2.8027	-3.90156	3.91746e-08
AT1G30755	elongation factor G%2C putative (DUF668)	7.24855	28.2499	1.96302	3.04534e-08
AT1G30757	transmembrane protein	3.1341	12.1293	1.95441	6.68963e-06
AT1G30760	ATBBE-LIKE 13; BERBERINE BRIDGE ENZYME-LIKE 13	13.9952	0.398817	-5.15016	1.08192e-12
AT1G30810	JUMONJI DOMAIN-CONTAINING PROTEIN 18 (JMJ18)	3.20393	14.9465	2.22207	3.72515e-15
AT1G30820	CTP synthase family protein	15.4606	4.22226	-1.87204	9.785e-09
AT1G30870	Peroxidase superfamily protein	1.48078	0	-9.66459	5.47428e-10
AT1G30880	hypothetical protein	91.9525	39.8568	-1.20621	3.25677e-05
AT1G30900	VACUOLAR SORTING RECEPTOR 6 (VSR6)	1.05715	14.0429	3.73171	2.22027e-11
AT1G30910	Molybdenum cofactor sulfurase family protein	7.26636	15.862	1.12624	6.48064e-05
AT1G30935		5.22591	0.0323136	-7.32176	1.93024e-32
AT1G30960	ERA-2	3.96454	0.868222	-2.1925	1.06413e-07
AT1G30970	SUPPRESSOR OF FRIGIDA4 (SUF4)	19.5781	9.78995	-0.999306	0.000233844
AT1G31010	ORGANELLAR SINGLE-STRANDED DNA BINDING PROTEIN 4 (OSB4)	4.75179	2.21152	-1.1014	0.00649281
AT1G31120	K+ UPTAKE PERMEASE 10 (KUP10)	6.94136	2.57137	-1.43243	2.12694e-06
AT1G31130	polyadenylate-binding protein 1-B-binding protein	84.3501	281.105	1.73666	8.10802e-09
AT1G31150	K-box region protein (DUF1985)	2.04796	3.71765	0.857806	0.0471952
AT1G31160	HISTIDINE TRIAD NUCLEOTIDE-BINDING 2 (HINT 2)	2.90313	14.5533	2.32274	7.03736e-09
AT1G31170	SULFIREDOXIN (SRX)	5.68647	21.9919	1.95173	1.32857e-09
AT1G31175	cytochrome C oxidase biogenesis Cmc1-like protein	6.03821	3.0508	-0.982561	0.00567314
AT1G31190	MYO-INOSITOL MONOPHOSPHATASE LIKE 1 (IMPL1)	2.88111	33.9279	3.55739	3.84692e-29
AT1G31200	PHLOEM PROTEIN 2-A9 (PP2-A9)	0.321926	7.46247	4.50197	5.79331e-15
AT1G31230	ASPARTATE KINASE-HOMOSERINE DEHYDROGENASE I (AK-HSDH I)	8.67328	14.6549	0.756227	0.010459
AT1G31240	Bromodomain transcription factor	1.66138	0.559922	-1.581	0.00449893
AT1G31290	ARGONAUTE 3 (AGO3)	32.0714	3.38189	-3.24328	1.62207e-09
AT1G31300	TRAM%2C LAG1 and CLN8 (TLC) lipid-sensing domain containing protein	9.19609	20.0587	1.12457	3.94769e-05
AT1G31320	LOB DOMAIN-CONTAINING PROTEIN 4 (LBD4)	66.3111	0.647651	-6.68849	1.28209e-53
AT1G31330	PHOTOSYSTEM I SUBUNIT F (PSAF)	26.3914	3492.89	7.04784	4.07741e-25
AT1G31350	KAR-UP F-BOX 1 (KUF1)	19.6058	30.1698	0.621729	0.01954
AT1G31355		4.00159	1.98754	-1.00487	0.0210116
AT1G31410	ENF2; ENLARGED FIL EXPRESSION DOMAIN 2	5.10718	13.6566	1.41833	4.63044e-06
AT1G31420	FEI 1 (FEI1)	12.6867	38.9672	1.61876	1.03589e-07
AT1G31440	SH3 domain-containing protein	13.9067	27.9255	1.00525	0.00342537
AT1G31470	NUCLEAR FUSION DEFECTIVE 4 (NFD4)	4.36149	1.87886	-1.2138	0.000925536
AT1G31480	SHOOT GRAVITROPISM 2 (SGR2)	4.94048	3.11424	-0.665764	0.0201646
AT1G31540	Disease resistance protein (TIR-NBS-LRR class) family	10.1296	80.5862	2.99174	3.60342e-18
AT1G31550	GDSL-like Lipase/Acylhydrolase superfamily protein	0.00628045	12.0708	10.6629	2.74482e-47
AT1G31580	(ECS1)	0.0743288	2337.18	15.0633	3.3502e-64
AT1G31660	bystin-like protein	21.7154	8.23944	-1.39947	0.00015643
AT1G31690	Copper amine oxidase family protein	0.00392408	4.11618	9.68095	1.55044e-32
AT1G31710	Copper amine oxidase family protein	0.0277721	1.57505	5.7696	1.99823e-10
AT1G31750	proline-rich family protein	0.0913218	1.48972	4.01684	1.05436e-10
AT1G31760	SWIB/MDM2 domain superfamily protein	5.46252	0.897081	-2.61152	1.54679e-08
AT1G31770	ATP-BINDING CASSETTE G14 (ABCG14)	4.53082	2.05606	-1.1422	0.00538332
AT1G31780	oligomeric golgi complex subunit	17.085	9.19101	-0.893466	0.0023353
AT1G31800	"CYTOCHROME P450, FAMILY 97, SUBFAMILY A, POLYPEPTIDE 3" (CYP97A3)	2.40238	51.0707	4.40907	4.55348e-43
AT1G31810	FORMIN HOMOLOGY 14 (AFH14)	10.2483	5.28904	-0.954592	0.000675336
AT1G31812	ACYL-COA-BINDING PROTEIN 6 (ACBP6)	56.891	261.608	2.20122	1.21005e-12
AT1G31814	FRIGIDA LIKE 2 (FRL2)	6.07417	2.60205	-1.22423	0.000672132
AT1G31817	NUCLEAR FUSION DEFECTIVE 3 (NFD3)	19.9631	11.6286	-0.780423	0.0103397
AT1G31820	POLYAMINE UPTAKE TRANSPORTER 1 (PUT1)	1.90225	4.71033	1.31093	0.0153279
AT1G31830	POLYAMINE UPTAKE TRANSPORTER 2 (PUT2)	14.9563	4.82148	-1.63154	2.71852e-08
AT1G31850	S-adenosyl-L-methionine-dependent methyltransferases superfamily protein	28.5328	13.9003	-1.03757	0.000726305
AT1G31870	pre-mRNA-splicing factor of RES complex protein	11.1377	6.6546	-0.74273	0.00458639
AT1G31880	BREVIS RADIX (BRX)	2.70621	0.413683	-2.7061	1.65535e-10
AT1G31900		3.92627	1.30745	-1.58578	0.00882638
AT1G31910	GHMP kinase family protein	66.466	35.01	-0.924817	0.00272552
AT1G31920	Tetratricopeptide repeat (TPR)-like superfamily protein	0.0160439	10.9562	9.45617	1.0383e-36
AT1G31935		3.88023	1.7215	-1.18305	0.0353251
AT1G31940	cystic fibrosis transmembrane conductance regulator	4.8652	21.9966	2.17581	3.20994e-11
AT1G31970	STRESS RESPONSE SUPPRESSOR 1 (STRS1)	44.2636	25.49	-0.79655	0.0373055
AT1G32060	PHOSPHORIBULOKINASE (PRK)	0.233631	1554.3	12.6932	6.58588e-26
AT1G32070	NUCLEAR SHUTTLE INTERACTING (NSI)	4.45584	40.1404	3.16963	1.71736e-26
AT1G32080	(LrgB)	0.0186285	305.205	14.062	4.34289e-41
AT1G32090	early-responsive to dehydration stress protein (ERD4)	39.1294	4.06903	-3.26451	3.07551e-26
AT1G32100	PINORESINOL REDUCTASE 1 (PRR1)	3.73772	9.03964	1.27438	0.0251203
AT1G32120	serine/threonine-protein phosphatase 7 long form-like protein	1.82052	3.87617	1.08908	0.00142718
AT1G32150	BASIC REGION/LEUCINE ZIPPER TRANSCRIPTION FACTOR 68 (bZIP68)	3.22061	7.85964	1.28689	3.29672e-05
AT1G32160	beta-casein (DUF760)	5.16854	61.1139	3.56259	6.02687e-31
AT1G32170	XYLOGLUCAN ENDOTRANSGLUCOSYLASE/HYDROLASE 30 (XTH30)	11.9609	4.94519	-1.27409	0.00851181
AT1G32190	alpha/beta-Hydrolases superfamily protein	16.6593	1.1329	-3.8788	3.75468e-37
AT1G32200	(ATS1)	5.65579	36.2558	2.68039	9.46238e-19
AT1G32210	DEFENDER AGAINST APOPTOTIC DEATH 1 (ATDAD1)	20.4815	13.3192	-0.620073	0.0249983
AT1G32220	NAD(P)-binding Rossmann-fold superfamily protein	5.42604	68.594	3.65952	1.53621e-34
AT1G32240	KANADI 2 (KAN2)	0.130851	1.10904	3.06874	3.70781e-08
AT1G32260	envelope glycoprotein	12.858	6.21634	-1.04646	0.0019957
AT1G32330	HEAT SHOCK TRANSCRIPTION FACTOR A1D (HSFA1D)	5.63436	3.5651	-0.659392	0.0353775
AT1G32360	Zinc finger (CCCH-type) family protein	10.7643	19.8896	0.885207	0.00149494
AT1G32400	TOBAMOVIRUS MULTIPLICATION 2A (TOM2A)	30.9509	53.4283	0.787616	0.00658553
AT1G32440	PLASTIDIAL PYRUVATE KINASE 3 (PKp3)	7.50563	29.24	1.96161	6.37163e-07
AT1G32450	NITRATE TRANSPORTER 1.5 (NRT1.5)	0.0512281	10.4204	7.63327	8.75908e-32
AT1G32460	hypothetical protein	20.036	64.943	1.69683	4.03435e-09
AT1G32470	Single hybrid motif superfamily protein	0.53886	614.182	10.1282	4.2294e-57
AT1G32500	ATP-BINDING CASSETTE I7 (ABCI7)	8.77129	47.4161	2.4343	7.42063e-16
AT1G32520	TLDc domain protein	3.82635	31.5794	3.04313	1.18618e-09
AT1G32540	LSD ONE LIKE 1 (LOL1)	0.603102	9.07566	3.9162	1.291e-15
AT1G32550	FERREDOXIN C 2 (FdC2)	0.57874	23.3644	5.33233	1.06235e-50
AT1G32560	LATE EMBRYOGENESIS ABUNDANT 4-1 (AtLEA4-1)	1.15662	0.0516587	-4.23361	7.32416e-08
AT1G32583	TRUE	2.65563	0.485562	-2.46103	0.000400916
AT1G32640	(MYC2)	26.7103	433.99	4.02194	1.12415e-26
AT1G32690	DUF740 family protein	11.2265	3.43024	-1.70408	9.17604e-05
AT1G32700	PLATZ transcription factor family protein	14.3211	26.9181	0.910142	0.00594252
AT1G32750	(HAF01)	12.1894	7.96344	-0.614075	0.0405304
AT1G32760	Glutaredoxin family protein	7.58207	1.31237	-2.53449	3.50928e-08
AT1G32810	RING/FYVE/PHD zinc finger superfamily protein	14.9255	8.67913	-0.782125	0.00378599
AT1G32870	NAC DOMAIN PROTEIN 13 (NAC13)	18.7614	8.34969	-1.16805	6.40443e-05
AT1G32900	GRANULE BOUND STARCH SYNTHASE 1 (GBSS1)	0.90893	315.899	8.43898	8.04478e-22
AT1G32910	HXXXD-type acyl-transferase family protein	0.042735	4.51703	6.70816	1.7367e-23
AT1G32920	hypothetical protein	93.7695	1042.47	3.47466	1.05624e-12
AT1G32928	Avr9/Cf-9 rapidly elicited protein	6.99721	150.909	4.42925	1.81662e-15
AT1G32930	ATGALT31A; GALT31A; GLYCOSYLTRANSFERASE OF CAZY FAMILY GT31 A	3.89145	1.06034	-1.87685	2.1784e-07
AT1G32990	PLASTID RIBOSOMAL PROTEIN L11 (PRPL11)	5.23568	203.973	5.28317	1.95817e-54
AT1G33030	O-methyltransferase family protein	22.8007	1.89266	-3.58287	1.41798e-06
AT1G33050	hypothetical protein	89.2602	36.1112	-1.30541	0.000166387
AT1G33055	hypothetical protein	97.4683	0.508023	-7.5693	1.93113e-64
AT1G33060	NAC 014 (NAC014)	11.7801	5.56113	-1.08276	0.0001553
AT1G33080	MATE efflux family protein	0.0415204	4.13891	6.60351	2.86422e-14
AT1G33110	MATE efflux family protein	18.4608	42.8823	1.21581	0.00147181
AT1G33170	S-adenosyl-L-methionine-dependent methyltransferases superfamily protein	0.203087	5.75067	4.81294	3.79735e-05
AT1G33240	GT-2-LIKE 1 (GTL1)	4.3341	72.755	4.06862	8.35938e-35
AT1G33260	Protein kinase superfamily protein	1.4643	8.40369	2.51945	1.3774e-08
AT1G33290	P-loop containing nucleoside triphosphate hydrolases superfamily protein	7.15413	21.0005	1.55277	9.92973e-08
AT1G33330	Class I peptide chain release factor	3.98837	12.4831	1.64499	1.01445e-06
AT1G33340	ENTH/ANTH/VHS superfamily protein	1.03735	12.3655	3.56529	4.3127e-11
AT1G33350	Pentatricopeptide repeat (PPR) superfamily protein	1.81961	0.766243	-1.24393	0.00434353
AT1G33360	ATP-dependent Clp protease	6.57465	3.67463	-0.838108	0.00370777
AT1G33390	FASCIATED STEM 4 (FAS4)	6.96025	4.28831	-0.697723	0.0203881
AT1G33410	SUPPRESSOR OF AUXIN RESISTANCE1 (SAR1)	11.0605	4.47951	-1.30397	2.54709e-06
AT1G33420	RING/FYVE/PHD zinc finger superfamily protein	13.2528	5.91138	-1.16492	1.45007e-05
AT1G33440	Major facilitator superfamily protein	0.188699	1.67834	3.14254	3.81987e-05
AT1G33475	SNARE-like superfamily protein	0.25464	3.00606	3.52369	8.72945e-08
AT1G33560	ACTIVATED DISEASE RESISTANCE 1 (ADR1)	13.5907	21.9216	0.689961	0.0327829
AT1G33600	Leucine-rich repeat (LRR) family protein	1.43898	95.2159	6.04847	7.9267e-32
AT1G33610	Leucine-rich repeat (LRR) family protein	0.547003	56.9681	6.68539	9.32999e-62
AT1G33612	Leucine-rich repeat (LRR) family protein	1.66008	0.205368	-2.99563	1.89812e-07
AT1G33615		1.3536	0.246162	-2.40641	2.21506e-05
AT1G33680	KH domain-containing protein	27.816	15.7667	-0.819178	0.00642216
AT1G33700	Beta-glucosidase%2C GBA2 type family protein	0.590336	2.19171	1.88949	0.000755374
AT1G33720	"CYTOCHROME P450, FAMILY 76, SUBFAMILY C, POLYPEPTIDE 6" (CYP76C6)	0.0282215	23.4734	9.654	4.81201e-46
AT1G33760	ERF022; ETHYLENE RESPONSE FACTOR022	2.08094	195.152	6.54505	1.44298e-09
AT1G33770	Protein kinase superfamily protein	0.361371	9.6509	4.74793	3.71038e-17
AT1G33780	electron transporter%2C putative (DUF179)	18.624	29.7126	0.673982	0.011486
AT1G33790	jacalin lectin family protein	43.3227	0.647457	-6.06389	1.32776e-63
AT1G33800	glucuronoxylan 4-O-methyltransferase-like protein (DUF579)	6.05063	2.85749	-1.0862	0.0152324
AT1G33810	zinc finger/BTB domain protein	7.32831	27.3181	1.89795	4.23117e-10
AT1G33811	GDSL-like Lipase/Acylhydrolase superfamily protein	0	14.0216	13.3167	6.89729e-50
AT1G33960	AVRRPT2-INDUCED GENE 1 (AIG1)	0.497767	19.6055	5.29233	1.86272e-08
AT1G34000	ONE-HELIX PROTEIN 2 (OHP2)	1.85296	306.299	7.36279	1.52602e-31
AT1G34030	Ribosomal protein S13/S18 family	100.322	56.4064	-0.830955	0.0128935
AT1G34065	S-ADENOSYLMETHIONINE CARRIER 2 (SAMC2)	2.451	0.917597	-1.41984	0.000624826
AT1G34110	RGF1 INSENSITIVE 5; RGI5	27.7025	3.81005	-2.86188	2.80712e-12
AT1G34130	STAUROSPORIN AND TEMPERATURE SENSITIVE 3-LIKE B (STT3B)	19.6066	11.4404	-0.776437	0.00830113
AT1G34150	Pseudouridine synthase family protein	5.70195	3.64731	-0.643833	0.0392506
AT1G34160	Tetratricopeptide repeat (TPR)-like superfamily protein	3.78163	1.68644	-1.1626	0.00340859
AT1G34180	NAC DOMAIN CONTAINING PROTEIN 16 (NAC016)	9.3725	2.59434	-1.84924	0.000560578
AT1G34260	FORMS APLOID AND BINUCLEATE CELLS 1A (FAB1D)	3.09896	18.1172	2.5482	2.1779e-12
AT1G34300	lectin protein kinase family protein	35.1977	14.4902	-1.27951	0.000288404
AT1G34315	transmembrane protein	2.01618	0.821873	-1.29131	0.0456346
AT1G34355	PARALLEL SPINDLE 1 (PS1)	2.95858	0.338497	-3.13029	2.58144e-12
AT1G34360	translation initiation factor 3 (IF-3) family protein	5.34942	2.49325	-1.09877	0.0013306
AT1G34370	SENSITIVE TO PROTON RHIZOTOXICITY 1 (STOP1)	73.725	29.5776	-1.31748	1.26668e-05
AT1G34380	5'-3' exonuclease family protein	1.73768	3.3784	0.961243	0.0328417
AT1G34420	leucine-rich repeat transmembrane protein kinase family protein	2.47237	10.0897	2.02908	4.49299e-06
AT1G34430	EMBRYO DEFECTIVE 3003 (EMB3003)	9.16755	39.5209	2.10729	1.94686e-11
AT1G34570	Essential protein Yae1%2C N-terminal	3.75515	11.5387	1.61935	7.19247e-06
AT1G34630	transmembrane protein	12.8627	6.56965	-0.967957	0.00101645
AT1G34750	Protein phosphatase 2C family protein	18.113	44.2574	1.28917	0.000904976
AT1G34760	GENERAL REGULATORY FACTOR 11 (GRF11)	0.780482	5.50439	2.8229	1.42943e-07
AT1G34770	melanoma-associated antigen G1-like protein	4.97327	0.965907	-2.3649	1.83813e-10
AT1G35140	PHOSPHATE-INDUCED 1 (PHI-1)	96.8082	616.477	2.6708	4.09647e-10
AT1G35180	TRAM%2C LAG1 and CLN8 (TLC) lipid-sensing domain containing protein	0.0165962	1.88278	6.65991	2.2429e-14
AT1G35190	2-oxoglutarate (2OG) and Fe(II)-dependent oxygenase superfamily protein	18.994	3.8421	-2.30726	1.022e-06
AT1G35210	hypothetical protein	2.4785	69.8718	4.82276	3.32327e-30
AT1G35220	FAM91 carboxy-terminus protein	8.32424	4.75439	-0.807208	0.00626974
AT1G35230	ARABINOGALACTAN PROTEIN 5 (AGP5)	8.26074	54.4599	2.72167	6.02514e-06
AT1G35320	transmembrane protein	16.1301	0.67742	-4.58299	8.01719e-28
AT1G35340	ATP-dependent protease La (LON) domain protein	2.9245	31.4762	3.42802	7.44507e-34
AT1G35350	EXS (ERD1/XPR1/SYG1) family protein	0.350502	43.9279	6.96059	7.47064e-78
AT1G35420	alpha/beta-Hydrolases superfamily protein	0.17281	66.1828	8.53929	2.1494e-47
AT1G35430	transmembrane protein	5.79109	24.8366	2.1002	1.42611e-08
AT1G35460	FLOWERING BHLH 1 (FBH1)	4.16167	15.5608	1.90273	3.16077e-08
AT1G35510	O-fucosyltransferase family protein	5.7778	12.0256	1.05696	0.000292567
AT1G35560	TCP family transcription factor	1.94017	17.1863	3.14311	9.91188e-14
AT1G35660	erythroid differentiation factor-like protein	6.55014	4.12405	-0.668546	0.0472127
AT1G35670	CALCIUM-DEPENDENT PROTEIN KINASE 2 (CDPK2)	13.2248	29.4219	1.15355	0.000390184
AT1G35680	CHLOROPLAST RIBOSOMAL PROTEIN L21 (RPL21C)	7.10975	241.203	5.08334	1.21155e-45
AT1G35710	kinase family with leucine-rich repeat domain-containing protein	1.42494	270.337	7.56502	5.27352e-51
AT1G35720	ANNEXIN 1 (ANNAT1)	182.327	73.6372	-1.30796	0.00886733
AT1G35780	N-lysine methyltransferase	13.3448	6.12955	-1.12358	0.000294471
AT1G35830	VQ motif-containing protein	3.88928	1.06911	-1.86875	0.000564329
AT1G35910	TREHALOSE-6-PHOSPHATE PHOSPHATASE D (TPPD)	25.8035	0.505254	-5.69234	1.77456e-21
AT1G36060	TG; TRANSLUCENT GREEN; WIND3	160.052	0.4523	-8.45332	1.92275e-68
AT1G36070	Transducin/WD40 repeat-like superfamily protein	7.98611	3.6703	-1.12064	4.28288e-05
AT1G36180	ACETYL-COA CARBOXYLASE 2 (ACC2)	9.63135	1.13387	-3.08625	3.04312e-13
AT1G36280	L-Aspartase-like family protein	7.47414	4.64397	-0.686361	0.0254574
AT1G36320	hypothetical protein	12.5719	57.9424	2.20467	9.19426e-16
AT1G36370	SERINE HYDROXYMETHYLTRANSFERASE 7 (SHM7)	48.5893	194.292	1.99948	0.00208788
AT1G36390	Co-chaperone GrpE family protein	3.68551	14.9012	2.0148	2.15339e-11
AT1G36622	transmembrane protein	0.756235	39.9854	5.73212	1.83512e-14
AT1G37130	NITRATE REDUCTASE 2 (NIA2)	435.635	1714.5	1.97659	1.63185e-07
AT1G38065	O-fucosyltransferase family protein	0.840446	6.65949	2.98108	1.47064e-09
AT1G38131	O-fucosyltransferase family protein	1.0453	8.19753	2.96799	9.43075e-10
AT1G40089		0.546237	4.41208	3.00868	2.06249e-09
AT1G41830	SKU5-SIMILAR 6 (SKS6)	14.9197	36.375	1.28557	0.00582788
AT1G41880	Ribosomal protein L35Ae family protein	97.0403	58.4956	-0.730503	0.0306988
AT1G42430	EARLY STARVATION 1; ESV1	3.4934	8.34469	1.25492	0.00164561
AT1G42440	pre-rRNA-processing TSR1-like protein	18.4567	8.22938	-1.16576	6.08185e-05
AT1G42470	ATNPC1 - 1; NIEMANN-PICK DISEASE TYPE C1-1	3.63838	10.1289	1.47678	3.16509e-07
AT1G42540	GLUTAMATE RECEPTOR 3.3 (GLR3.3)	3.29043	10.4899	1.67236	1.30822e-08
AT1G42550	PLASTID MOVEMENT IMPAIRED1 (PMI1)	0.0247275	135.047	12.5177	5.99928e-53
AT1G42960	inner membrane localized protein	23.3995	86.7229	1.88955	9.76167e-12
AT1G42970	GLYCERALDEHYDE-3-PHOSPHATE DEHYDROGENASE B SUBUNIT (GAPB)	0.159845	1817.74	13.4796	1.07556e-25
AT1G42990	BASIC REGION/LEUCINE ZIPPER MOTIF 60 (BZIP60)	51.7829	232.815	2.1687	2.64845e-08
AT1G43000	PLATZ transcription factor family protein	0.0361142	5.04785	7.10387	6.08933e-21
AT1G43160	RELATED TO AP2 6 (RAP2.6)	15.4944	3.01764	-2.36212	4.53451e-07
AT1G43170	RIBOSOMAL PROTEIN 1 (RP1)	419.337	205.718	-1.02749	0.00313317
AT1G43560	THIOREDOXIN Y2 (ty2)	3.3475	67.3109	4.32884	4.50622e-44
AT1G43650	nodulin MtN21 /EamA-like transporter family protein	0.00428058	1.77877	8.64506	1.31887e-24
AT1G43670	FRUCTOSE-1,6-BISPHOSPHATASE (FBP)	9.08519	78.2972	3.10754	3.95915e-16
AT1G43765		1.50049	0.0594594	-4.51306	6.09862e-08
AT1G43790	TRACHEARY ELEMENT DIFFERENTIATION-RELATED 6 (TED6)	11.3996	26.4814	1.21761	0.0146498
AT1G43800	FLORAL TRANSITION AT THE MERISTEM1 (FTM1)	315.076	0.203791	-10.5866	4.38385e-105
AT1G43860	sequence-specific DNA binding transcription factor	10.655	5.55102	-0.939881	0.00132084
AT1G43900	Protein phosphatase 2C family protein	10.4351	16.1918	0.633342	0.0287128
AT1G43910	P-loop containing nucleoside triphosphate hydrolases superfamily protein	95.837	23.1715	-2.04799	9.66785e-08
AT1G44000	SGRL; STAY-GREEN LIKE	3.05063	139.446	5.51299	1.5705e-36
AT1G44050	Cysteine/Histidine-rich C1 domain family protein	5.17692	0.0215105	-7.84143	6.68004e-10
AT1G44100	AMINO ACID PERMEASE 5 (AAP5)	13.6914	32.2385	1.23526	0.000936789
AT1G44110	CYCLIN A1;1 (CYCA1;1)	4.47479	0.906743	-2.30943	1.23334e-06
AT1G44170	ALDEHYDE DEHYDROGENASE 3H1 (ALDH3H1)	17.932	7.82782	-1.19581	4.24535e-05
AT1G44180	Peptidase M20/M25/M40 family protein	25.4054	0.360633	-6.1264	3.99389e-32
AT1G44350	IAA-LEUCINE RESISTANT (ILR)-LIKE GENE 6 (ILL6)	6.56819	22.0399	1.74656	1.45717e-09
AT1G44446	CHLORINA 1 (CH1)	4.2308	149.259	5.14031	7.69822e-33
AT1G44542	Cyclase family protein	2.35254	0	-10.4186	1.97304e-17
AT1G44575	NONPHOTOCHEMICAL QUENCHING 4 (NPQ4)	0.117163	1568.99	13.7157	1.77745e-30
AT1G44740	hypothetical protein	1.39576	0.133459	-3.39302	6.1751e-09
AT1G44750	PURINE PERMEASE 11 (PUP11)	16.1939	8.29779	-0.964827	0.000379448
AT1G44780	translation initiation factor	4.88495	1.03343	-2.23449	9.4958e-09
AT1G44790	ChaC-like family protein	6.83857	16.2501	1.2485	8.21159e-05
AT1G44800	SILIQUES ARE RED 1 (SIAR1)	1.65348	10.4313	2.65845	0.00278659
AT1G44810	DNA-binding storekeeper protein-related transcriptional regulator	44.2485	14.8815	-1.57229	1.60607e-09
AT1G44820	Peptidase M20/M25/M40 family protein	8.21014	17.1959	1.06626	8.73427e-05
AT1G44835	YbaK/aminoacyl-tRNA synthetase-associated domain-containing protein	7.78367	4.68853	-0.731497	0.0189011
AT1G44900	MINICHROMOSOME MAINTENANCE 2 (MCM2)	13.1265	2.63761	-2.31716	2.95712e-13
AT1G44920	transmembrane protein	3.49431	73.8428	4.39835	1.63985e-30
AT1G44960	SNARE associated Golgi protein family	8.63189	3.57601	-1.26932	6.47878e-05
AT1G45010	TRAM%2C LAG1 and CLN8 (TLC) lipid-sensing domain containing protein	0.0740224	5.45692	6.142	2.05408e-12
AT1G45191	BETA GLUCOSIDASE 1 (BGLU1)	0	2.87716	11.6433	1.60327e-19
AT1G45201	TRIACYLGLYCEROL LIPASE-LIKE 1 (TLL1)	0.189529	22.6459	6.88977	1.09968e-17
AT1G45207	Remorin family protein	3.33588	7.99425	1.25968	0.00451157
AT1G45230	DCL protein (DUF3223)	2.10843	28.972	3.7778	1.21999e-23
AT1G45231	S-adenosyl-L-methionine-dependent methyltransferases superfamily protein	5.12553	2.3784	-1.10611	0.000705699
AT1G45233	(THO5)	6.72848	3.2511	-1.04732	0.00232732
AT1G45249	ABSCISIC ACID RESPONSIVE ELEMENTS-BINDING FACTOR 2 (ABF2)	5.32015	14.2071	1.41629	3.69635e-05
AT1G45332	Translation elongation factor EFG/EF2 protein	13.7698	6.56127	-1.06913	8.19903e-05
AT1G45474	PHOTOSYSTEM I LIGHT HARVESTING COMPLEX GENE 5 (LHCA5)	0.506707	175.516	8.41793	7.36216e-55
AT1G45545	WEAK CHLOROPLAST MOVEMENT UNDER BLUE LIGHT-like protein (DUF827)	0.154902	1.55723	3.30311	2.84477e-06
AT1G45688	CC1; COMPANION OF CELLULOSE SYNTHASE 1	40.8641	95.1135	1.2187	7.91836e-05
AT1G46264	HEAT SHOCK TRANSCRIPTION FACTOR B4 (HSFB4)	12.161	1.08964	-3.47738	8.15009e-12
AT1G46480	WUSCHEL RELATED HOMEOBOX 4 (WOX4)	9.47756	1.99118	-2.25396	7.51382e-05
AT1G46768	RELATED TO AP2 1 (RAP2.1)	0.447037	4.26907	3.24331	2.11775e-07
AT1G47128	ESPONSIVE TO DEHYDRATION 21A (RD21A)	95.8571	302.602	1.65849	7.10692e-07
AT1G47200	WPP DOMAIN PROTEIN 2 (WPP2)	61.2084	38.4565	-0.670983	0.013458
AT1G47210	CYCLIN-DEPENDENT PROTEIN KINASE 3;2 (CYCA3;2)	18.7135	5.82379	-1.6847	2.70911e-07
AT1G47230	CYCLIN A3;4 (CYCA3;4)	4.97301	2.75884	-0.850597	0.0191439
AT1G47250	20S PROTEASOME ALPHA SUBUNIT F2 (PAF2)	23.1647	13.1038	-0.821526	0.00275752
AT1G47278	hypothetical protein	18.1656	10.2352	-0.827973	0.0079466
AT1G47340	F-box and associated interaction domains-containing protein	3.55476	1.18546	-1.58619	3.26669e-05
AT1G47370	ESPONSE TO THE BACTERIAL TYPE III EFFECTOR PROTEIN HOPBA1; RBA1	0.0108111	1.10415	6.64545	1.36819e-15
AT1G47395	hypothetical protein	0.0129861	58.6533	11.3813	1.80683e-39
AT1G47400	hypothetical protein	0.0144265	40.6047	11.1555	1.07881e-37
AT1G47410	hypothetical protein	0.913369	3.05987	1.73805	0.000372261
AT1G47480	alpha/beta-Hydrolases superfamily protein	7.92382	2.65046	-1.5774	0.000196386
AT1G47510	INOSITOL POLYPHOSPHATE 5-PHOSPHATASE 11 (5PTASE11)	25.1115	2.15693	-3.54332	4.4966e-09
AT1G47530	MATE efflux family protein	19.1147	57.9257	1.59927	1.1497e-05
AT1G47570	RING/U-box superfamily protein	4.07182	2.2858	-0.832759	0.00591545
AT1G47578	Biotin/lipoate A/B protein ligase family	1.05099	0.33686	-1.65726	0.00688866
AT1G47580	DYW DOMAIN PROTEIN 1; DYW1	1.67894	24.8101	3.87876	1.34451e-14
AT1G47655	Dof-type zinc finger DNA-binding family protein	0.893199	2.45476	1.4467	0.0488704
AT1G47670	Transmembrane amino acid transporter family protein	30.9847	3.89992	-2.99065	3.24648e-12
AT1G47720	ORGANELLAR SINGLE-STRANDED (OSB1)	4.90315	2.14925	-1.19211	0.00219992
AT1G47840	HEXOKINASE 3 (HXK3)	2.85455	1.08096	-1.40312	0.000736007
AT1G47870	(ATE2F2)	7.7909	2.16019	-1.84865	1.52709e-08
AT1G47960	CELL WALL / VACUOLAR INHIBITOR OF FRUCTOSIDASE 1 (C/VIF1)	27.9569	8.77321	-1.67193	1.41799e-06
AT1G47970	nucleolin	39.6521	24.7795	-0.678342	0.0266583
AT1G47980	desiccation-like protein	1.13152	0.149613	-2.87139	0.00061756
AT1G47990	GIBBERELLIN 2-OXIDASE 4 (GA2OX4)	1.30283	0	-9.98086	2.34477e-16
AT1G48000	MYB DOMAIN PROTEIN 112 (MYB112)	12.0841	0.259201	-5.54404	2.1388e-36
AT1G48030	MITOCHONDRIAL LIPOAMIDE DEHYDROGENASE 1 (mtLPD1)	74.0713	248.377	1.74556	3.93376e-09
AT1G48050	(KU80)	8.21765	4.67683	-0.812593	0.00375024
AT1G48110	EVOLUTIONARILY CONSERVED C-TERMINAL REGION 7 (ECT7)	13.25	21.4032	0.691736	0.0127977
AT1G48175	EMBRYO DEFECTIVE 2191 (emb2191)	5.74476	2.73478	-1.06757	0.00562449
AT1G48200	hypothetical protein	6.65706	3.43819	-0.951143	0.00921657
AT1G48240	NOVEL PLANT SNARE 12 (NPSN12)	4.7615	7.8277	0.716039	0.0434469
AT1G48280	hydroxyproline-rich glycoprotein family protein	0.579209	1.79036	1.62209	0.0010944
AT1G48300	DIACYLGLYCEROL ACYLTRANSFERASE 3 (DGAT3)	151.148	463.329	1.61605	8.59982e-07
AT1G48320	DHNA-COA THIOESTERASE 1 (DHNAT1)	6.01359	16.2545	1.43369	0.000167089
AT1G48350	EMBRYO DEFECTIVE 3105 (EMB3105)	9.75106	255.093	4.70802	7.62479e-35
AT1G48370	YELLOW STRIPE LIKE 8 (YSL8)	5.32129	1.7099	-1.63263	8.39023e-05
AT1G48390	RNI-like superfamily protein	1.60625	0.435111	-1.8904	0.000348852
AT1G48410	ARGONAUTE 1 (AGO1)	32.6284	19.6984	-0.728053	0.0144807
AT1G48420	D-CYSTEINE DESULFHYDRASE (D-CDES)	16.515	40.3352	1.28798	1.27659e-06
AT1G48440	B-cell receptor-associated 31-like protein	30.5275	48.0775	0.655237	0.0193787
AT1G48450	alanine-tRNA ligase%2C putative (DUF760)	16.9042	102.179	2.59544	6.29748e-18
AT1G48480	RECEPTOR-LIKE KINASE 1 (RKL1)	4.34711	20.6737	2.24826	1.50385e-07
AT1G48510	Surfeit locus 1 cytochrome c oxidase biogenesis protein	9.01913	0.0101431	-9.43212	1.21547e-52
AT1G48520	GLU-ADT SUBUNIT B (GATB)	4.78106	34.0187	2.8301	1.77295e-22
AT1G48560	hypothetical protein	4.6666	1.073	-2.11806	4.19547e-09
AT1G48580	nuclear localized protein	1.79824	0.315443	-2.51151	3.78996e-07
AT1G48605	(ATHAL3B)	12.5234	3.74744	-1.73392	0.000219866
AT1G48620	HIGH MOBILITY GROUP A5 (HON5)	31.7528	20.5724	-0.626081	0.0358864
AT1G48630	RECEPTOR FOR ACTIVATED C KINASE 1B (RACK1B_AT)	95.52	38.3258	-1.31791	0.00088958
AT1G48650	DEA(D/H)-box RNA helicase family protein	11.5159	23.8433	1.04978	0.00276432
AT1G48745	hypothetical protein	1.32761	19.1813	3.85264	9.86755e-11
AT1G48830	Ribosomal protein S7e family protein	68.8648	43.5916	-0.659935	0.0298798
AT1G48870	Transducin/WD40 repeat-like superfamily protein	4.91032	0.189603	-4.68475	1.71092e-17
AT1G48920	NUCLEOLIN LIKE 1 (NUC-L1)	174.52	42.594	-2.03479	2.98242e-09
AT1G48960	Adenine nucleotide alpha hydrolases-like superfamily protein	4.92349	12.174	1.30619	0.000180291
AT1G49000	transmembrane protein	1.40728	9.25085	2.72004	7.13199e-09
AT1G49005	CLAVATA3/ESR-RELATED 11 (CLE11)	1.61308	0.0177357	-6.4881	6.52666e-19
AT1G49010	Duplicated homeodomain-like superfamily protein	0.796084	29.4692	5.19854	1.75367e-11
AT1G49032	hypothetical protein	14.2946	42.9683	1.588	0.000458089
AT1G49130	B-BOX DOMAIN PROTEIN 17; BBX17	0.200318	16.3261	6.32368	2.73649e-26
AT1G49160	(WNK7)	9.61965	2.10756	-2.18731	6.14473e-07
AT1G49200	RING/U-box superfamily protein	0.67888	9.32671	3.768	6.95688e-06
AT1G49350	pfkB-like carbohydrate kinase family protein	4.95524	2.48391	-0.99431	0.00475252
AT1G49360	F-box family protein	13.5701	3.53412	-1.93856	9.32834e-11
AT1G49380	cytochrome c biogenesis protein family	1.68808	33.0109	4.28892	1.30556e-39
AT1G49390	2-oxoglutarate (2OG) and Fe(II)-dependent oxygenase superfamily protein	2.02453	0.109363	-4.23018	4.64544e-11
AT1G49410	TRANSLOCASE OF THE OUTER MITOCHONDRIAL MEMBRANE 6 (TOM6)	25.108	14.7501	-0.768291	0.0108778
AT1G49430	LONG-CHAIN ACYL-COA SYNTHETASE 2 (LACS2)	1.18505	5.65744	2.25219	1.38519e-06
AT1G49450	Transducin/WD40 repeat-like superfamily protein	0.0226144	12.2712	8.92032	4.75096e-36
AT1G49470	transmembrane epididymal protein (DUF716)	0.00898301	16.9427	10.4611	1.6817e-46
AT1G49475	AP2/B3-like transcriptional factor family protein	4.81198	0.699904	-2.78053	1.55674e-08
AT1G49480	RELATED TO VERNALIZATION1 1 (RTV1)	11.9811	27.3003	1.18767	7.18713e-05
AT1G49490	Leucine-rich repeat (LRR) family protein	0.0594698	2.49977	5.33754	8.96954e-17
AT1G49500	transcription initiation factor TFIID subunit 1b-like protein	0.945895	126.069	7.06072	1.41121e-51
AT1G49510	EMBRYO DEFECTIVE 1273 (emb1273)	5.95727	19.1742	1.68529	7.18325e-08
AT1G49540	ELONGATOR PROTEIN 2 (ELP2)	10.6844	2.90554	-1.87859	1.45916e-12
AT1G49560	Homeodomain-like superfamily protein	8.74873	2.92027	-1.58564	3.00946e-06
AT1G49630	PRESEQUENCE PROTEASE 2 (PREP2)	1.91784	5.39318	1.49067	9.47195e-06
AT1G49650	alpha/beta-Hydrolases superfamily protein	0.822867	9.88446	3.57585	3.50931e-10
AT1G49660	CARBOXYESTERASE 5 (CXE5)	11.027	25.7413	1.22137	0.0122212
AT1G49670	(NQR)	17.6374	11.0088	-0.680003	0.0244946
AT1G49700	Plant protein 1589 of unknown function	3.70954	0.729248	-2.33745	0.00029249
AT1G49720	ABSCISIC ACID RESPONSIVE ELEMENT-BINDING FACTOR 1 (ABF1)	8.89297	2.8637	-1.63106	0.00313317
AT1G49730	Protein kinase superfamily protein	1.69734	12.1154	2.83536	1.12166e-15
AT1G49750	Leucine-rich repeat (LRR) family protein	0.756622	146.449	7.5849	7.42611e-45
AT1G49760	POLY(A) BINDING PROTEIN 8 (PAB8)	45.8396	25.4908	-0.846853	0.0217061
AT1G49780	PLANT U-BOX 26 (PUB26)	7.58109	35.2683	2.21674	1.12196e-06
AT1G49820	S-METHYL-5-THIORIBOSE KINASE (MTK)	25.6449	14.1739	-0.854888	0.00181427
AT1G49840	glutamyl-tRNA (Gln) amidotransferase subunit A (DUF620)	3.45175	28.6722	3.05322	2.39765e-21
AT1G49870	myosin-2 heavy chain-like protein	4.20852	0.833128	-2.33894	1.15454e-07
AT1G49880	ERV1 (Erv1)	1.47947	3.15188	1.09081	0.00946218
AT1G49910	BUB (BUDDING UNINHIBITED BY BENZYMIDAZOL) 3.2 (BUB3.2)	2.62253	0.258475	-3.34668	1.1326e-12
AT1G49920	MuDR family transposase	1.00976	0.103691	-3.30886	2.30701e-07
AT1G49950	TELOMERE REPEAT BINDING FACTOR 1 (TRB1)	14.6053	27.1851	0.896134	0.00109964
AT1G49970	CLP PROTEASE PROTEOLYTIC SUBUNIT 1 (CLPR1)	18.2608	117.075	2.68064	4.88777e-19
AT1G49975	photosystem I reaction center subunit N	0	44.8831	13.6319	1.9738e-57
AT1G49990	F-box family protein	0.146697	2.72657	4.19218	2.23687e-11
AT1G50010	TUBULIN ALPHA-2 CHAIN (TUA2)	171.123	63.2071	-1.43694	9.75289e-06
AT1G50020	tubulin alpha-6 chain	5.88325	86.5974	3.87939	4.33364e-28
AT1G50030	TARGET OF RAPAMYCIN (TOR)	11.1262	7.0791	-0.652233	0.0330912
AT1G50040	formin-like protein%2C putative (DUF1005)	3.31788	15.0394	2.17983	0.000433963
AT1G50055	TRANS-ACTING SIRNA1B (TAS1B)	8.18805	4.18152	-0.968658	0.0372833
AT1G50090	BRANCHED-CHAIN AMINO ACID TRANSAMINASE 7 (BCAT7)	14.4105	0	-13.4294	1.61037e-12
AT1G50110	D-aminoacid aminotransferase-like PLP-dependent enzymes superfamily protein	15.576	0.443501	-5.15499	8.81361e-20
AT1G50170	SIROHYDROCHLORIN FERROCHELATASE B (SIRB)	5.19661	16.5194	1.66784	1.01274e-07
AT1G50180	NB-ARC domain-containing disease resistance protein	0.215119	5.47549	4.6676	1.12266e-20
AT1G50240	FUSED (FU)	3.98428	0.552191	-2.8538	4.67872e-15
AT1G50250	FTSH PROTEASE 1 (FTSH1)	2.32876	275.526	6.88494	1.45618e-35
AT1G50280	Phototropic-responsive NPH3 family protein	0.0113024	1.7271	7.05728	2.5232e-15
AT1G50290	hypothetical protein	0.814265	9.79988	3.57769	2.35461e-14
AT1G50300	TBP-ASSOCIATED FACTOR 15 (TAF15)	6.39118	3.87791	-0.721706	0.0185121
AT1G50320	THIOREDOXIN X (THX)	6.26509	265.917	5.40782	3.27311e-56
AT1G50400	Eukaryotic porin family protein	1.47297	0.184904	-2.95362	2.29143e-06
AT1G50420	SCARECROW-LIKE 3 (SCL3)	28.2749	7.35366	-1.94457	6.92215e-08
AT1G50430	DWARF 5 (DWF5)	13.7298	28.2808	1.04249	9.70326e-05
AT1G50440	RING/FYVE/PHD zinc finger superfamily protein	5.19659	11.9348	1.19974	9.1926e-05
AT1G50450	Saccharopine dehydrogenase	2.1729	25.2057	3.53622	5.67067e-21
AT1G50460	HEXOKINASE-LIKE 1 (HKL1)	6.8392	11.388	0.735145	0.012768
AT1G50490	UBIQUITIN-CONJUGATING ENZYME 20 (UBC20)	18.6832	4.31421	-2.11603	1.62725e-11
AT1G50510	indigoidine synthase A family protein	7.693	4.37984	-0.812478	0.00443682
AT1G50520	"CYTOCHROME P450, FAMILY 705, SUBFAMILY A, POLYPEPTIDE 27" (CYP705A27)	7.43021	1.30722	-2.49824	3.27939e-08
AT1G50550	"CYTOCHROME P450, FAMILY 705, SUBFAMILY A, POLYPEPTIDE 26, PSEUDOGENE" (CYP705A26P)	1.03941	0.306725	-1.75535	0.00235852
AT1G50560	"CYTOCHROME P450, FAMILY 705, SUBFAMILY A, POLYPEPTIDE 25" (CYP705A25)	3.75241	1.17814	-1.67216	0.000122983
AT1G50570	Calcium-dependent lipid-binding (CaLB domain) family protein	97.3158	24.2277	-2.00597	5.31121e-10
AT1G50580	UDP-Glycosyltransferase superfamily protein	1.80294	0	-9.75793	1.20641e-17
AT1G50590	RmlC-like cupins superfamily protein	0.905363	6.67398	2.88168	1.69219e-08
AT1G50600	SCARECROW-LIKE 5 (SCL5)	23.4456	58.604	1.32154	4.71376e-06
AT1G50620	RING/FYVE/PHD zinc finger superfamily protein	9.00234	4.86142	-0.890067	0.00524288
AT1G50630	extracellular ligand-gated ion channel protein (DUF3537)	13.2931	7.14303	-0.896108	0.00869582
AT1G50640	ETHYLENE RESPONSIVE ELEMENT BINDING FACTOR 3 (ERF3)	42.4056	99.0858	1.22443	8.9856e-06
AT1G50660	actin cytoskeleton-regulatory complex pan-like protein	26.2496	16.057	-0.709424	0.0254344
AT1G50710	AUGMIN SUBUNIT 4 (AUG4)	7.78348	3.49464	-1.15466	5.68214e-05
AT1G50732	transmembrane protein	0.0144077	45.677	11.1408	3.28864e-56
AT1G50740	Transmembrane proteins 14C	18.5826	80.0856	2.10771	1.72971e-13
AT1G50750	aminotransferase-like%2C mobile domain protein	1.26611	15.2126	3.58818	9.37962e-23
AT1G50790	Plant mobile domain protein family	1.43608	0.452353	-1.67055	0.0028711
AT1G50840	POLYMERASE GAMMA 2 (POLGAMMA2)	6.76793	14.3645	1.08525	0.000504285
AT1G50890	ARM repeat superfamily protein	1.92339	3.77528	0.972181	0.00763652
AT1G50900	GRANA DEFICIENT CHLOROPLAST 1 (GDC1)	0.659016	79.0901	6.8874	8.01169e-26
AT1G50910	hypothetical protein	1.60241	0.521078	-1.62229	0.000107729
AT1G50920	Nucleolar GTP-binding protein	103.074	47.0733	-1.13088	0.00118431
AT1G50950	protein disulfide-isomerase 5-like protein (DUF1692)	1.59737	0.637576	-1.31984	0.00207517
AT1G50970	Membrane trafficking VPS53 family protein	5.39804	1.81411	-1.5719	2.37705e-06
AT1G51000	hypothetical protein	30.1785	0	-11.1987	1.95148e-29
AT1G51010	hypothetical protein	43.3933	0.0487266	-9.51736	6.00229e-42
AT1G51020	hypothetical protein	36.9185	0.0336542	-9.95922	1.33032e-68
AT1G51030	hypothetical protein	8.54233	0	-10.4601	2.39117e-23
AT1G51035	hypothetical protein	12.8258	0	-10.0235	2.80736e-14
AT1G51080	golgin family A protein	1.71835	9.32619	2.43865	2.58038e-08
AT1G51090	Heavy metal transport/detoxification superfamily protein	0.0806772	18.4939	7.84827	6.124e-32
AT1G51100	CHLORORESPIRATORY REDUCTION 41 (CRR41)	3.02967	20.9941	2.79263	1.83756e-11
AT1G51110	Plastid-lipid associated protein PAP / fibrillin family protein	0.321444	53.4326	7.38166	1.41297e-40
AT1G51130	Nse4%2C component of Smc5/6 DNA repair complex	5.88178	0.591207	-3.31684	8.29879e-19
AT1G51160	SNARE-like superfamily protein	19.1966	11.6516	-0.719646	0.00970404
AT1G51170	AGC2 KINASE 3; AGC2-3; UCN; UNICORN	17.0464	3.90195	-2.12786	2.42504e-06
AT1G51190	PLETHORA 2 (PLT2)	12.0371	0.0187048	-9.32182	2.99857e-69
AT1G51270	vesicle-associated protein 1-4	0.627031	18.6737	4.89201	3.05352e-14
AT1G51310	tRNA (5-methylaminomethyl-2-thiouridylate)-methyltransferase	4.40026	8.38715	0.93053	0.00249581
AT1G51340	MATE efflux family protein	0.156732	16.3858	6.68818	8.69787e-33
AT1G51360	DIMERIC A/B BARREL DOMAINS-PROTEIN 1 (DABB1)	7.92406	16.831	1.08668	0.00258033
AT1G51380	DEA(D/H)-box RNA helicase family protein	4.72805	0.395182	-3.58511	1.14612e-15
AT1G51400	Photosystem II 5 kD protein	1.56337	77.3091	5.60855	2.0603e-35
AT1G51420	SUCROSE-PHOSPHATASE 1 (SPP1)	25.3853	0.00626378	-11.7025	1.01242e-62
AT1G51440	DAD1-LIKE LIPASE 2; DALL2	0	5.28157	11.7066	4.25511e-22
AT1G51460	ATP-BINDING CASSETTE G13 (ABCG13)	3.60128	0.0877147	-5.34392	9.61381e-25
AT1G51500	ATP-BINDING CASSETTE G12 (ABCG12)	15.9161	63.3275	1.992	1.71776e-06
AT1G51510	(Y14)	28.807	17.7067	-0.701703	0.00871459
AT1G51570	Calcium-dependent lipid-binding (CaLB domain) plant phosphoribosyltransferase family protein	29.3556	54.9643	0.904622	0.0041875
AT1G51590	ALPHA-MANNOSIDASE 1 (MNS1)	11.1382	6.25727	-0.831394	0.00196615
AT1G51620	Protein kinase superfamily protein	0.600645	14.1464	4.55914	2.17396e-25
AT1G51630	ATMSR2; MANNAN SYNTHESIS RELATED 2; MSR2	40.6076	19.626	-1.04919	0.000260381
AT1G51660	MITOGEN-ACTIVATED PROTEIN KINASE KINASE 4 (MKK4)	13.896	54.9487	1.98341	8.5892e-14
AT1G51670	HEAT-INDUCED TAS1 TARGET 5; HTT5	0.0693176	2.40038	5.11311	1.7193e-12
AT1G51690	PROTEIN PHOSPHATASE 2A 55 KDA REGULATORY SUBUNIT B ALPHA ISOFORM (B ALPHA)	9.14723	14.8104	0.695139	0.00989191
AT1G51700	DOF ZINC FINGER PROTEIN 1 (DOF1)	13.2926	152.969	3.52434	1.734e-22
AT1G51710	UBIQUITIN-SPECIFIC PROTEASE 6 (UBP6)	22.6575	13.6442	-0.731521	0.0144765
AT1G51760	IAA-ALANINE RESISTANT 3 (IAR3)	68.1886	152.799	1.16409	0.00145791
AT1G51790	Leucine-rich repeat protein kinase family protein	0.093698	2.55786	4.77673	2.72222e-06
AT1G51800	IMPAIRED OOMYCETE SUSCEPTIBILITY 1 (IOS1)	0.443076	6.39205	3.85313	2.56391e-05
AT1G51805	Leucine-rich repeat protein kinase family protein	0.00287733	74.347	14.6167	1.10618e-87
AT1G51820	Leucine-rich repeat protein kinase family protein	0.0362478	10.7398	8.25009	7.85763e-26
AT1G51860	Leucine-rich repeat protein kinase family protein	0.204134	1.88017	3.19614	4.15504e-05
AT1G51890	Leucine-rich repeat protein kinase family protein	0.239601	7.01122	4.86912	2.50703e-09
AT1G51940	LYSM-CONTAINING RECEPTOR-LIKE KINASE 3 (LYK3)	1.39475	7.05843	2.33831	7.66138e-05
AT1G51950	INDOLE-3-ACETIC ACID INDUCIBLE 18 (IAA18)	10.7187	36.1771	1.7549	4.89221e-08
AT1G51965	ABA OVERLY-SENSITIVE 5 (ABO5)	8.37302	3.28167	-1.35137	5.41426e-05
AT1G52000	Mannose-binding lectin superfamily protein	0.0144673	16.4102	10.0337	4.26903e-44
AT1G52040	MYROSINASE-BINDING PROTEIN 1 (MBP1)	0.0304411	6.1536	7.5593	3.63629e-09
AT1G52080	(AR791)	5.84462	1.43254	-2.03155	1.0962e-08
AT1G52100	Mannose-binding lectin superfamily protein	5.02168	0.00577002	-9.66291	1.39722e-18
AT1G52110	Mannose-binding lectin superfamily protein	1.04657	0	-10.099	3.45878e-17
AT1G52120	Mannose-binding lectin superfamily protein	6.34137	0	-12.2522	5.17217e-13
AT1G52130	Mannose-binding lectin superfamily protein	60.6318	0	-15.1984	1.34361e-28
AT1G52140	Avr9/Cf-9 rapidly elicited protein	17.6075	8.05674	-1.1305	0.010192
AT1G52150	(ATHB-15)	55.1765	6.97437	-2.98437	1.70108e-18
AT1G52155	transmembrane protein	4.25272	1.93849	-1.13561	0.00322705
AT1G52160	TRNASE Z3 (TRZ3)	7.5476	2.54855	-1.56491	5.55025e-07
AT1G52190	ATNPF1.2; NITRATE TRANSPORTER 1.11; NPF1.2; NRT1.11; NRT1/ PTR FAMILY 1.2	0.120734	24.6519	7.65748	3.09258e-10
AT1G52200	PLAC8 family protein	2.27407	11.8356	2.38171	0.00201107
AT1G52220	CURVATURE THYLAKOID protein	1.41012	271.892	7.58475	3.05256e-21
AT1G52230	PHOTOSYSTEM I SUBUNIT H2 (PSAH2)	1.9484	1331.53	9.41075	2.0677e-20
AT1G52260	PDI-LIKE 1-5 (PDIL1-5)	12.5408	3.98249	-1.65346	4.54568e-09
AT1G52290	PROLINE-RICH EXTENSIN-LIKE RECEPTOR KINASE 15 (PERK15)	0.218872	19.8918	6.47593	7.74262e-31
AT1G52300	Zinc-binding ribosomal protein family protein	176.524	94.0296	-0.908812	0.0065166
AT1G52310	protein kinase family protein / C-type lectin domain-containing protein	22.0597	9.89817	-1.15638	1.05998e-05
AT1G52315	IST1-LIKE 9; ISTL9	4.49044	1.87651	-1.25867	0.0438667
AT1G52330	Late embryogenesis abundant (LEA) hydroxyproline-rich glycoprotein family	7.95375	0.0672697	-6.72238	3.26673e-28
AT1G52342	hypothetical protein	28.1416	111.461	1.98514	1.87521e-06
AT1G52360	Coatomer%2C beta' subunit	24.0805	13.1579	-0.87174	0.00406189
AT1G52370	Ribosomal protein L22p/L17e family protein	11.6939	6.39109	-0.870521	0.00378566
AT1G52380	NUP50 (Nucleoporin 50 kDa) protein	27.9955	16.0925	-0.798954	0.00291917
AT1G52400	BETA GLUCOSIDASE 18 (BGLU18)	0.49167	37.7947	6.25891	8.68319e-18
AT1G52410	TSK-ASSOCIATING PROTEIN 1 (TSA1)	0.0357321	5.60878	7.31525	9.13166e-21
AT1G52420	UDP-Glycosyltransferase superfamily protein	27.28	16.2379	-0.748165	0.0112728
AT1G52450	Ubiquitin carboxyl-terminal hydrolase-related protein	1.11728	0.261558	-2.08763	8.0007e-07
AT1G52500	MUTM HOMOLOG-1 (MMH-1)	9.67775	3.32924	-1.54028	8.79071e-08
AT1G52510	alpha/beta-Hydrolases superfamily protein	0.637158	45.3619	6.15281	7.29424e-51
AT1G52530	Hus1-like protein	1.55709	0.289523	-2.43042	7.05709e-06
AT1G52550	transmembrane protein	1.89052	14.9422	2.98134	1.81381e-12
AT1G52565	cytochrome P450 family protein	11.2458	23.958	1.0905	0.00613404
AT1G52590	Putative thiol-disulfide oxidoreductase DCC	2.87891	28.1003	3.28463	1.19775e-22
AT1G52618	hypothetical protein	1.03918	5.44282	2.37382	7.70673e-06
AT1G52620	Pentatricopeptide repeat (PPR) superfamily protein	3.86014	1.78349	-1.11124	0.0039008
AT1G52640	Pentatricopeptide repeat (PPR) superfamily protein	1.03057	0.497777	-1.04715	0.0314465
AT1G52670	Single hybrid motif superfamily protein	7.85107	15.7771	1.00646	0.000399813
AT1G52720	hypothetical protein	17.8196	84.4751	2.2441	3.23904e-13
AT1G52740	HISTONE H2A PROTEIN 9 (HTA9)	116.394	75.5859	-0.622788	0.0493166
AT1G52760	LYSOPHOSPHOLIPASE 2 (LysoPL2)	151.218	28.201	-2.4225	1.62762e-12
AT1G52770	Phototropic-responsive NPH3 family protein	0.0148577	2.69097	7.39499	7.00194e-19
AT1G52820	2-oxoglutarate (2OG) and Fe(II)-dependent oxygenase superfamily protein	2.5944	1.08227	-1.25104	0.00727855
AT1G52830	INDOLE-3-ACETIC ACID 6 (IAA6)	0.00446023	3.51565	8.93159	1.81867e-23
AT1G52870	Peroxisomal membrane 22 kDa (Mpv17/PMP22) family protein	1.90666	242.163	6.98757	2.2198e-65
AT1G52905	hypothetical protein	19.215	8.58902	-1.16531	0.0096827
AT1G52930	ARABIDOPSIS HOMOLOGUE OF YEAST BRX1 2; ATBRX1-2	20.4498	6.21765	-1.71985	2.91776e-07
AT1G52980	NUCLEAR/NUCLEOLAR GTPASE 2 (AtNug2)	44.1098	25.956	-0.765308	0.0190401
AT1G53035	transmembrane protein	9.46252	1.09722	-3.10182	4.26977e-12
AT1G53040	tRNA (met) cytidine acetyltransferase%2C putative (DUF616)	7.39523	3.48291	-1.08502	0.00264641
AT1G53050	Protein kinase superfamily protein	23.9352	10.0229	-1.25569	5.82149e-06
AT1G53060	Legume lectin family protein	4.66985	1.34216	-1.79823	0.00053393
AT1G53070	Legume lectin family protein	20.9792	1.56074	-3.76039	6.11591e-15
AT1G53090	SPA1-RELATED 4 (SPA4)	0.561818	22.0772	5.29139	3.06793e-16
AT1G53110	proton pump-interactor	3.78512	1.98718	-0.924741	0.0253776
AT1G53120	RNA-binding S4 domain-containing protein	4.07049	10.4773	1.3627	5.80164e-05
AT1G53140	DYNAMIN RELATED PROTEIN 5A (DRP5A)	3.84312	0.607517	-2.66571	9.861e-10
AT1G53160	SQUAMOSA PROMOTER BINDING PROTEIN-LIKE 4 (SPL4)	0.806218	21.0752	4.69619	2.37424e-08
AT1G53170	ETHYLENE RESPONSE FACTOR 8 (ERF8)	9.28727	97.3374	3.38809	3.37704e-16
AT1G53180	hypothetical protein	18.7203	0.189397	-6.65572	1.72153e-44
AT1G53190	TEAR1; TIE1-ASSOCIATED 33 RING-TYPE E3 LIGASE 1	9.72008	14.965	0.622207	0.0234254
AT1G53200	TAF RNA polymerase I subunit A	4.71281	2.8262	-0.738444	0.0263896
AT1G53210	ATNCL; NA+/CA2+ EXCHANGER; NCL	36.5576	334.651	3.19433	2.48763e-21
AT1G53240	MITOCHONDRIAL MALATE DEHYDROGENASE 1 (mMDH1)	81.2421	142.629	0.811911	0.0186364
AT1G53250	histone-lysine N-methyltransferase%2C H3 lysine-79 specific-like protein	0.976203	2.96653	1.59855	0.000565957
AT1G53280	DJ-1 HOMOLOG B (DJ1B)	22.008	40.0825	0.864955	0.00141851
AT1G53290	Galactosyltransferase family protein	3.13799	6.40715	1.02936	0.00465742
AT1G53310	PHOSPHOENOLPYRUVATE CARBOXYLASE 1 (PPC1)	73.3128	33.6126	-1.12507	0.000605566
AT1G53320	TUBBY LIKE PROTEIN 7 (TLP7)	28.8755	14.2894	-1.01388	0.00432944
AT1G53345	DHHA1 domain protein	3.31263	0.776196	-2.09805	4.91689e-05
AT1G53350	Disease resistance protein (CC-NBS-LRR class) family	0.985775	5.76121	2.54378	1.60654e-09
AT1G53380	hypothetical protein (DUF641)	15.671	9.00409	-0.800051	0.00882997
AT1G53400	Ubiquitin domain-containing protein	6.54435	15.3395	1.22832	0.000186187
AT1G53430	NEMATODE-INDUCED LRR-RLK 2; NILR2	11.0541	25.1118	1.18379	0.000953083
AT1G53440	Leucine-rich repeat transmembrane protein kinase	7.53251	13.8845	0.882589	0.00514472
AT1G53450	epstein-barr nuclear antigen	1.86535	4.52019	1.27566	0.000456241
AT1G53460	craniofacial development protein	10.3682	5.21111	-0.992362	0.00107566
AT1G53470	MECHANOSENSITIVE CHANNEL OF SMALL CONDUCTANCE-LIKE 4 (MSL4)	26.2313	0.358119	-6.20726	3.53334e-54
AT1G53480	MTO 1 RESPONDING DOWN 1 (MRD1)	1.65102	0.0440412	-5.27213	1.17907e-10
AT1G53490	HOMOLOG OF HUMAN HEI10 ( ENHANCER OF CELL INVASION NO.10) (HEI10)	2.6902	0.16231	-4.04682	8.57507e-17
AT1G53520	FATTY-ACID-BINDING PROTEIN 3 (FAP3)	1.10644	15.0705	3.76169	8.57813e-14
AT1G53560	Ribosomal protein L18ae family	4.18224	37.6893	3.17312	1.93463e-20
AT1G53570	MITOGEN-ACTIVATED PROTEIN KINASE KINASE KINASE 3 (MAP3KA)	10.3824	20.5206	0.983213	0.00026399
[truncated: 10,113 more rows]
